# Supplementary material for: A unicellular relative of animals generates a layer of polarized cells by actomyosin-dependent cellularization
Source: PubMed Central journal article supplement (PMC6855841; doi:10.7554/elife.49801), 2019-10-28
Supplement: elife-49801-fig3-data1.pdf [file elife-49801-fig3-data1.pdf]

Table 1

**Metrics of the *S. arctica* genome assemblies**

| Metrics                | Version 1 (Grau-Bove et al. 2017) | Version 2.1 (this study) |
|------------------------|-----------------------------------|--------------------------|
| Total sequence length  | 121,588,341 bp                    | 142,721,209 bp           |
| Number of supercontigs | 15,618                            | 737                      |
| Supercontig N50        | 64,598 bp                         | 243,943 bp               |
| Longest supercontig    | 357,797 bp                        | 776,519 bp               |

**Metrics of the *S. arctica* genome assemblies (without the mitochondrial genome)**

| Metrics                | Version 1 (Grau-Bove et al. 2017) | Version 2.1 (this study) |
|------------------------|-----------------------------------|--------------------------|
| Total sequence length  | 121,588,341 bp                    | 115,079,836 bp           |
| Number of supercontigs | 15,618                            | 732                      |
| Supercontig N50        | 64,598 bp                         | 244,210 bp               |
| Longest supercontig    | 357,797 bp                        | 776,519 bp               |
