# Supplementary material for: A unicellular relative of animals generates a layer of polarized cells by actomyosin-dependent cellularization
Source: PubMed Central journal article supplement (PMC6855841; doi:10.7554/elife.49801), 2019-10-28
Supplement: elife-49801-fig4-data4.pdf [file elife-49801-fig4-data4.pdf]

# Sheet1

| Species name      | Short name | Source                                                                                                                                                                                                  |
|-------------------|------------|---------------------------------------------------------------------------------------------------------------------------------------------------------------------------------------------------------|
| H. sapiens        | Hsap       | Ensembl 80                                                                                                                                                                                              |
| S. kowalewskii    | Skow       |                                                                                                                                                                                                         |
| D. melanogaster   | Dmel       | Ensembl Metazoa 27                                                                                                                                                                                      |
| N. vectensis      | Nvec       | Ensembl Metazoa 27                                                                                                                                                                                      |
| T. adherens       | Tadh       | Ensembl Metazoa 27                                                                                                                                                                                      |
| M. leidii         | Mlei       | Ensembl Metazoa 27                                                                                                                                                                                      |
| A. queenslandica  | Aque       | Ensembl Metazoa 27                                                                                                                                                                                      |
| S. rosetta        | Sros       | Ensembl Protist 27                                                                                                                                                                                      |
| C. owczarzewski   | Cowc       | <a href="https://figshare.com/articles/Genome_-_Capsaspora_owczarzewski_v3_/4123158">https://figshare.com/articles/Genome_-_Capsaspora_owczarzewski_v3_/4123158</a>                                     |
| M. vibrans        | Mvib       |                                                                                                                                                                                                         |
| S. arctica        | Sarc       | this study                                                                                                                                                                                              |
| C. fragrantissima | Cfra       | <a href="https://figshare.com/articles/Creolimax_fragrantissima_genome_data/1403592">https://figshare.com/articles/Creolimax_fragrantissima_genome_data/1403592</a>                                     |
| I. hoferi         | Ihof       | <a href="https://figshare.com/articles/Genome_-_Ichthyophonus_hoferi/5426488">https://figshare.com/articles/Genome_-_Ichthyophonus_hoferi/5426488</a>                                                   |
| A. whisleri       | Awhi       | <a href="https://figshare.com/articles/Genome_-_Abeoforma_whisleri_/5426458">https://figshare.com/articles/Genome_-_Abeoforma_whisleri_/5426458</a>                                                     |
| C. perkinsii      | Cper       | <a href="https://figshare.com/articles/Genome_-_Chromosphaera_perkinsii/5426494">https://figshare.com/articles/Genome_-_Chromosphaera_perkinsii/5426494</a>                                             |
| P. gemmata        | Pgem       | <a href="https://figshare.com/articles/Genome_-_Pirum_gemmata/5426506">https://figshare.com/articles/Genome_-_Pirum_gemmata/5426506</a>                                                                 |
| S. destruens      | Sdes       | <a href="https://figshare.com/articles/Transcriptome_-_Sphaerothecum_destruens_rosette_agent_/5446489">https://figshare.com/articles/Transcriptome_-_Sphaerothecum_destruens_rosette_agent_/5446489</a> |
| C. limatocisporum | Clim       | <a href="https://figshare.com/articles/Genome_-_Corallochytrium_limatocisporum/5426470">https://figshare.com/articles/Genome_-_Corallochytrium_limatocisporum/5426470</a>                               |
| F. alba           | Falb       | SRP022580                                                                                                                                                                                               |
| C. anguillulae    | Cang       | Ensembl Fungi 27                                                                                                                                                                                        |
| S. punctatus      | Spun       | SRR343043                                                                                                                                                                                               |
| M. verticillata   | Mver       |                                                                                                                                                                                                         |
| S. pombe          | Spom       | Ensembl Fungi 27                                                                                                                                                                                        |
| T. trahens        | Ttra       |                                                                                                                                                                                                         |
| A. castellanii    | Acas       | Ensembl Protist 27                                                                                                                                                                                      |
| D. discoideum     | Ddis       | Ensembl Protist 27                                                                                                                                                                                      |
| N. gruberi        | Ngru       | Ensembl Protist 27                                                                                                                                                                                      |
| T. thermophila    | Tthe       | Ensembl Protist 27                                                                                                                                                                                      |
| E. huxleyi        | Ehux       | Ensembl Protist 27                                                                                                                                                                                      |
| A. thaliana       | Atha       | Ensembl Plants 27                                                                                                                                                                                       |
| P. yezoensis      | Pyez       |                                                                                                                                                                                                         |
