# Supplementary material for: A unicellular relative of animals generates a layer of polarized cells by actomyosin-dependent cellularization
Source: PubMed Central journal article supplement (PMC6855841; doi:10.7554/elife.49801), 2019-10-28
Supplement: elife-49801-fig5-data2.pdf [file elife-49801-fig5-data2.pdf]

| <b>Common gene name</b>  | <b>Reference gene name</b>             |
|--------------------------|----------------------------------------|
| alpha-tubulin            | Sarc4_g31031T                          |
| beta-tubulin             | Sarc4_g29856T                          |
| Arp2                     | Sarc4_g15431T                          |
| Arp3                     | Sarc4_g29717T                          |
| Arp4                     | Sarc4_g33563T                          |
| Formin1                  | Sarc4_g11912T                          |
| Formin2                  | Sarc4_g18997T                          |
| Formin3                  | Sarc4_g26234T_Sarc4_g26235T            |
| Formin4                  | Sarc4_g26707T                          |
| Formin5                  | Sarc4_g32729T                          |
| Formin6                  | Sarc4_g8229T                           |
| Septin1                  | Sarc4_g12255T                          |
| Septin2                  | Sarc4_g19431T                          |
| Septin3                  | Sarc4_g20537T                          |
| Septin4                  | Sarc4_g8850T                           |
| Myosin II                | Sarc4_g23768T                          |
| Myosin V                 | Sarc4_g13387T                          |
| Profilin / Chickadee     | Sarc4_g5267T                           |
| Cofilin / Twinstar       | Sarc4_g6950T                           |
| Integrin alpha           | Sarc4_g1310T                           |
| Integrin beta            | Sarc4_g33805T                          |
| Pinch                    | Sarc4_g2938T                           |
| Parvin                   | Sarc4_g25286T                          |
| Paxilin                  | Sarc4_g20792T                          |
| Talin                    | Sarc4_g3704T_Sarc4_g3705T_Sarc4_g3706T |
| Vinculin / alpha-catenin | Sarc4_g11224T                          |
| alpha-actinin            | Sarc4_g4850T                           |
| Aardvark1                | Sarc4_g24897T                          |
| Aardvark2                | Sarc4_g24898T                          |
| Aardvark3                | Sarc4_g33617T                          |
| Kinesin1                 | Sarc4_g8678T                           |
| Kinesin2                 | Sarc4_g14701T                          |
| Kinesin3                 | Sarc4_g23312T                          |

|                  |                                           |
|------------------|-------------------------------------------|
| <b>Kinesin4</b>  | Sarc4_g23709T_Sarc4_g23711T_Sarc4_g23712T |
| <b>Kinesin5</b>  | Sarc4_g23709T_Sarc4_g23711T_Sarc4_g23712T |
| <b>Kinesin6</b>  | Sarc4_g27337T                             |
| <b>Kinesin7</b>  | Sarc4_g29337T                             |
| <b>Kinesin8</b>  | Sarc4_g29515T                             |
| <b>Kinesin9</b>  | Sarc4_g31878T                             |
| <b>Kinesin10</b> | Sarc4_g8472T_Sarc4_g8473T                 |
| <b>Kinesin11</b> | Sarc4_g8472T_Sarc4_g8473T                 |
| <b>Rho1</b>      | Sarc4_g28650T                             |
| <b>Rho2</b>      | Sarc4_g29101T                             |
| <b>Rho3</b>      | Sarc4_g32829T                             |
| <b>Rho4</b>      | Sarc4_g5839T                              |
| <b>Rab11_1</b>   | Sarc4_g17148T                             |
| <b>Rab11_2</b>   | Sarc4_g2031T                              |
| <b>Rab5_1</b>    | Sarc4_g1679T                              |
| <b>Rab5_2</b>    | Sarc4_g14741T                             |
