# Supplementary material for: A unicellular relative of animals generates a layer of polarized cells by actomyosin-dependent cellularization
Source: eLife. 2019 Oct 28;8:e49801. doi: 10.7554/eLife.49801 (PMC6855841; doi:10.7554/eLife.49801)
Supplement: Figure 4—source data 3. — Used in Figures 4 and 5. [file elife-49801-fig4-data3.csv]

Acas Aque Atha Awhi Cang Cfra Clim Cowc Cper Ddis Dmel Ehux Falb Hsap Ihof Mlei Mver Mvib Ngru Nvec Pgem Pyez Sarc Sdes Skow Spom Spun Sros Tadh Tcas Tthe Ttra
OG0000000 Acas_g10216	Acas_g10488	Acas_g10504	Acas_g10518	Acas_g10575	Acas_g10598	Acas_g10674	Acas_g10693	Acas_g10722	Acas_g10921	Acas_g10930	Acas_g10935	Acas_g10940	Acas_g10941	Acas_g10942	Acas_g10945	Acas_g10965	Acas_g10994	Acas_g11048	Acas_g11124	Acas_g11215	Acas_g11266	Acas_g11345	Acas_g11385	Acas_g1139	Acas_g1141	Acas_g11436	Acas_g11566	Acas_g11819	Acas_g11869	Acas_g12010	Acas_g12054	Acas_g12080	Acas_g12086	Acas_g12141	Acas_g12143	Acas_g12670	Acas_g12844	Acas_g12850	Acas_g13019	Acas_g13070	Acas_g13071	Acas_g13150	Acas_g13267	Acas_g13397	Acas_g13402	Acas_g13406	Acas_g1358	Acas_g13655	Acas_g13657
OG0000001 Acas_g11676	Acas_g11677	Acas_g12165	Acas_g13140	Acas_g13416	Acas_g14704	Acas_g15419	Acas_g3586	Acas_g543	Acas_g8174 Aque_XP_003382555	Aque_XP_003383359	Aque_XP_003384380	Aque_XP_003386833	Aque_XP_003387009	Aque_XP_003387336	Aque_XP_003388076	Aque_XP_003388267	Aque_XP_003388662	Aque_XP_003388930	Aque_XP_003389166	Aque_XP_003389582	Aque_XP_003389611	Aque_XP_003390028	Aque_XP_003390497	Aque_XP_003390581	Aque_XP_003390694	Aque_XP_003390918	Aque_XP_003391024	Aque_XP_003391051	Aque_XP_003391153	Aque_XP_003391163	Aque_XP_003391231	Aque_XP_003391288	Aque_XP_003391633	Aque_XP_003391700	Aque_XP_003392008	Aque_XP_003392093	Aque_XP_003392140 Atha_ATMG00860 Awhi_Unigene14963_m9413	Awhi_Unigene17186_m10956	Awhi_Unigene17528_m11370	Awhi_Unigene21942_m14985	Awhi_Unigene27536_m16690	Awhi_Unigene32258_m19713	Awhi_Unigene3967_m2956	Awhi_Unigene444_m444	Awhi_Unigene52_m56	Awhi_Unigene561_m559	Awhi_Unigene833_m857 Cang_100957	Cang_105217	Cang_110147
OG0000002 Acas_g10981	Acas_g11689	Acas_g1294	Acas_g13421	Acas_g13598	Acas_g13670	Acas_g14074	Acas_g16680	Acas_g1826	Acas_g2435	Acas_g2676	Acas_g3513	Acas_g3736	Acas_g4427	Acas_g7350 Aque_XP_003382595	Aque_XP_003383172	Aque_XP_003383203	Aque_XP_003383472	Aque_XP_003383814	Aque_XP_003383917	Aque_XP_003383920	Aque_XP_003384282	Aque_XP_003384468	Aque_XP_003384829	Aque_XP_003385052	Aque_XP_003385506	Aque_XP_003385595	Aque_XP_003385647	Aque_XP_003386456	Aque_XP_003386689	Aque_XP_003387419	Aque_XP_003387534	Aque_XP_003388781	Aque_XP_003388967	Aque_XP_003388968	Aque_XP_003389109	Aque_XP_003389224	Aque_XP_003389225	Aque_XP_003389844	Aque_XP_003390630	Aque_XP_003390813	Aque_XP_003390914	Aque_XP_003391053	Aque_XP_003391434	Aque_XP_003391840	Aque_XP_003391870	Aque_XP_003391886	Aque_XP_003392059 Atha_AT1G01950	Atha_AT1G09170	Atha_AT1G12430
OG0000003 Acas_g10720	Acas_g11624	Acas_g11938	Acas_g12239	Acas_g12437	Acas_g12866	Acas_g13593	Acas_g13594	Acas_g13595	Acas_g14784	Acas_g4160	Acas_g4198	Acas_g4302	Acas_g4856	Acas_g4961	Acas_g7165	Acas_g7927	Acas_g829	Acas_g8749	Acas_g8867	Acas_g8878	Acas_g8914	Acas_g9829 Aque_XP_003383252	Aque_XP_003383881	Aque_XP_003383882	Aque_XP_003383883	Aque_XP_003383884	Aque_XP_003383885	Aque_XP_003385947	Aque_XP_003386105	Aque_XP_003386306	Aque_XP_003386648	Aque_XP_003387395	Aque_XP_003387530	Aque_XP_003387700	Aque_XP_003389232	Aque_XP_003391658 Atha_AT1G26960	Atha_AT1G27045	Atha_AT1G69780	Atha_AT1G70920	Atha_AT2G01430	Atha_AT2G18550	Atha_AT2G22430	Atha_AT2G22800	Atha_AT2G36610	Atha_AT2G44910	Atha_AT2G46680	Atha_AT3G01220	Atha_AT3G01470	Atha_AT3G60390
OG0000004 Aque_XP_003382473	Aque_XP_003383045	Aque_XP_003383046	Aque_XP_003384581	Aque_XP_003385018	Aque_XP_003385365	Aque_XP_003385382	Aque_XP_003386003	Aque_XP_003386004	Aque_XP_003386401	Aque_XP_003386402	Aque_XP_003386653	Aque_XP_003386654	Aque_XP_003386904	Aque_XP_003388474	Aque_XP_003389560	Aque_XP_003389561	Aque_XP_003389934	Aque_XP_003389990	Aque_XP_003391427	Aque_XP_003391833	Aque_XP_003391844	Aque_XP_003392035 Awhi_Unigene10923_m7281	Awhi_Unigene27397_m16672	Awhi_Unigene40674_m26012	Awhi_Unigene4627_m3092	Awhi_Unigene6748_m3733 Cfra_0184T1	Cfra_1525T1	Cfra_1773T1	Cfra_7446T1 Cowc_CAOG_02764 Nk52_evm23s163 Ddis_XP_629912 Dmel_FBpp0073256	Dmel_FBpp0083153	Dmel_FBpp0084498	Dmel_FBpp0088727	Dmel_FBpp0110307 Hsap_ENSP00000205143	Hsap_ENSP00000246794	Hsap_ENSP00000249749	Hsap_ENSP00000254958	Hsap_ENSP00000257836	Hsap_ENSP00000264790	Hsap_ENSP00000328169	Hsap_ENSP00000331411	Hsap_ENSP00000344458	Hsap_ENSP00000345229	Hsap_ENSP00000349893	Hsap_ENSP00000355718	Hsap_ENSP00000356370	Hsap_ENSP00000359378	Hsap_ENSP00000362734	Hsap_ENSP00000367894	Hsap_ENSP00000376589 Ihof_3234
OG0000005 Acas_g10376	Acas_g10405	Acas_g12662	Acas_g13015	Acas_g1442	Acas_g15612	Acas_g15823	Acas_g16202	Acas_g16602	Acas_g17208	Acas_g17418	Acas_g1881	Acas_g3089	Acas_g3830	Acas_g4442	Acas_g4558	Acas_g6024	Acas_g6104	Acas_g6120	Acas_g6683	Acas_g6784	Acas_g7222	Acas_g7443	Acas_g8933 Aque_XP_003384993	Aque_XP_003385557	Aque_XP_003386447	Aque_XP_003386505	Aque_XP_003386929	Aque_XP_003386930	Aque_XP_003386931	Aque_XP_003387163	Aque_XP_003387942	Aque_XP_003389802	Aque_XP_003389803	Aque_XP_003390058	Aque_XP_003390863	Aque_XP_003390981	Aque_XP_003391005	Aque_XP_003391720 Atha_AT1G01600	Atha_AT1G13140	Atha_AT1G13150	Atha_AT1G13710	Atha_AT1G17060	Atha_AT1G24540	Atha_AT1G31800	Atha_AT1G34540	Atha_AT1G47620	Atha_AT1G50520	Atha_AT1G50560	Atha_AT1G57750
OG0000006 Acas_g10686	Acas_g12508	Acas_g1299	Acas_g1564	Acas_g1630	Acas_g300	Acas_g3023	Acas_g317	Acas_g3629	Acas_g691	Acas_g7162	Acas_g747	Acas_g8025	Acas_g8621	Acas_g914 Aque_XP_003382682	Aque_XP_003386044	Aque_XP_003386743	Aque_XP_003389643 Atha_AT1G04360	Atha_AT1G04790	Atha_AT1G12760	Atha_AT1G14200	Atha_AT1G15100	Atha_AT1G17970	Atha_AT1G18760	Atha_AT1G18770	Atha_AT1G18780	Atha_AT1G20823	Atha_AT1G21960	Atha_AT1G22500	Atha_AT1G22670	Atha_AT1G23980	Atha_AT1G24580	Atha_AT1G26800	Atha_AT1G28040	Atha_AT1G32361	Atha_AT1G33480	Atha_AT1G35330	Atha_AT1G35625	Atha_AT1G35630	Atha_AT1G45180	Atha_AT1G49200	Atha_AT1G49210	Atha_AT1G49220	Atha_AT1G49230	Atha_AT1G49850	Atha_AT1G50350	Atha_AT1G51930	Atha_AT1G53010	Atha_AT1G53190	Atha_AT1G53820
OG0000007 Acas_g104	Acas_g1189	Acas_g1190	Acas_g12109	Acas_g12335	Acas_g12381	Acas_g1288	Acas_g13139	Acas_g13983	Acas_g18195	Acas_g2007	Acas_g214	Acas_g3343	Acas_g3822	Acas_g3983	Acas_g7492	Acas_g8053	Acas_g8729	Acas_g9146	Acas_g9411 Aque_XP_003382766	Aque_XP_003383504	Aque_XP_003383837	Aque_XP_003384041	Aque_XP_003384983	Aque_XP_003385479	Aque_XP_003385666	Aque_XP_003385902	Aque_XP_003385924	Aque_XP_003386314	Aque_XP_003386315	Aque_XP_003386369	Aque_XP_003386485	Aque_XP_003386958	Aque_XP_003387122	Aque_XP_003388521	Aque_XP_003389496	Aque_XP_003391792	Aque_XP_003391973 Atha_AT1G45160	Atha_AT1G48490	Atha_AT3G08720	Atha_AT3G08730	Atha_AT3G17850	Atha_AT5G62310 Awhi_Unigene10527_m7115	Awhi_Unigene12233_m7911	Awhi_Unigene12991_m8406	Awhi_Unigene16422_m10121	Awhi_Unigene16483_m10189	Awhi_Unigene16484_m10190	Awhi_Unigene16485_m10192	Awhi_Unigene16579_m10284
OG0000008 Acas_g10495	Acas_g11499	Acas_g1169	Acas_g11838	Acas_g11910	Acas_g11911	Acas_g12096	Acas_g12297	Acas_g12957	Acas_g12958	Acas_g12959	Acas_g13729	Acas_g13730	Acas_g13731	Acas_g13987	Acas_g13988	Acas_g14024	Acas_g14320	Acas_g14375	Acas_g15783	Acas_g15784	Acas_g16159	Acas_g16260	Acas_g16635	Acas_g16788	Acas_g17538	Acas_g17619	Acas_g18758	Acas_g4939	Acas_g8061	Acas_g8618	Acas_g865	Acas_g866	Acas_g867 Aque_XP_003391589 Atha_AT4G23140	Atha_AT4G23160	Atha_ATMG00240	Atha_ATMG00300	Atha_ATMG00710	Atha_ATMG00810	Atha_ATMG00820 Awhi_Unigene14017_m9046	Awhi_Unigene15644_m9772	Awhi_Unigene20509_m14124	Awhi_Unigene20510_m14126	Awhi_Unigene23072_m15315	Awhi_Unigene28210_m16911	Awhi_Unigene4758_m3117	Awhi_Unigene92_m86 Cang_100050	Cang_101261	Cang_101291	Cang_111972
OG0000009 Acas_g10000	Acas_g10066	Acas_g10094	Acas_g10150	Acas_g10192	Acas_g10431	Acas_g10544	Acas_g10646	Acas_g10748	Acas_g10897	Acas_g11136	Acas_g1151	Acas_g11883	Acas_g12380	Acas_g1262	Acas_g12654	Acas_g12677	Acas_g12768	Acas_g12807	Acas_g12870	Acas_g13109	Acas_g13241	Acas_g1327	Acas_g13287	Acas_g13293	Acas_g13321	Acas_g1336	Acas_g13383	Acas_g13384	Acas_g13475	Acas_g13497	Acas_g13511	Acas_g1407	Acas_g14161	Acas_g145	Acas_g14902	Acas_g1513	Acas_g15239	Acas_g15551	Acas_g1565	Acas_g15737	Acas_g16086	Acas_g1629	Acas_g1645	Acas_g17019	Acas_g18139	Acas_g1830	Acas_g1864	Acas_g2734	Acas_g2809
OG0000010 Awhi_Unigene20146_m13792	Awhi_Unigene20952_m14526	Awhi_Unigene26858_m16490	Awhi_Unigene37145_m24050 Cfra_0574T1	Cfra_1484T1	Cfra_1701T1	Cfra_1948T1	Cfra_2886T1	Cfra_3159T1	Cfra_3195T1	Cfra_3417T1	Cfra_4765T1	Cfra_4994T1	Cfra_5570T1	Cfra_5725T1	Cfra_6234T1	Cfra_6243T1	Cfra_6276T1	Cfra_6379T1	Cfra_6380T1	Cfra_6449T1	Cfra_6582T1	Cfra_6723T1	Cfra_6946T1	Cfra_7205T1	Cfra_7221T1	Cfra_7376T1	Cfra_7537T1	Cfra_7705T1	Cfra_7775T1	Cfra_7776T1	Cfra_8460T1 Nk52_evm26s229	Nk52_evm27s229 Dmel_FBpp0070247	Dmel_FBpp0070268	Dmel_FBpp0070282	Dmel_FBpp0070826	Dmel_FBpp0070827	Dmel_FBpp0070828	Dmel_FBpp0071174	Dmel_FBpp0071322	Dmel_FBpp0071614	Dmel_FBpp0071636	Dmel_FBpp0071657	Dmel_FBpp0071658	Dmel_FBpp0072287	Dmel_FBpp0072964	Dmel_FBpp0072965	Dmel_FBpp0072966	Dmel_FBpp0072967	Dmel_FBpp0073070
OG0000011 Acas_g10069	Acas_g10375	Acas_g10447	Acas_g10517	Acas_g10878	Acas_g12304	Acas_g12438	Acas_g13277	Acas_g13431	Acas_g13628	Acas_g13668	Acas_g13769	Acas_g14250	Acas_g14319	Acas_g14396	Acas_g14718	Acas_g14972	Acas_g15404	Acas_g15465	Acas_g15545	Acas_g15637	Acas_g16133	Acas_g16359	Acas_g16559	Acas_g16575	Acas_g16576	Acas_g16783	Acas_g17310	Acas_g17452	Acas_g17614	Acas_g17709	Acas_g18585	Acas_g18723	Acas_g2358	Acas_g3397	Acas_g3399	Acas_g4163	Acas_g4208	Acas_g4849	Acas_g4853	Acas_g4857	Acas_g520	Acas_g5205	Acas_g5521	Acas_g5629	Acas_g6138	Acas_g7183	Acas_g7866	Acas_g791	Acas_g8136
OG0000012 Acas_g10064	Acas_g10711	Acas_g11176	Acas_g12186	Acas_g12674	Acas_g13005	Acas_g13268	Acas_g13921	Acas_g14548	Acas_g1527	Acas_g1541	Acas_g15941	Acas_g16080	Acas_g17099	Acas_g2322	Acas_g3282	Acas_g3301	Acas_g3544	Acas_g361	Acas_g3661	Acas_g3746	Acas_g4109	Acas_g45	Acas_g4783	Acas_g5758	Acas_g5796	Acas_g6463	Acas_g659	Acas_g6922	Acas_g695	Acas_g7479	Acas_g811	Acas_g8197	Acas_g8489	Acas_g8995	Acas_g9409	Acas_g9425	Acas_g9508	Acas_g9580	Acas_g9858 Aque_XP_003382737	Aque_XP_003382836	Aque_XP_003383175	Aque_XP_003384216	Aque_XP_003385111	Aque_XP_003385452	Aque_XP_003385510	Aque_XP_003385690	Aque_XP_003386295	Aque_XP_003386459	Aque_XP_003387783
OG0000013 Acas_g10166	Acas_g10186	Acas_g10545	Acas_g10626	Acas_g12800	Acas_g13179	Acas_g13465	Acas_g15765	Acas_g2254	Acas_g3307	Acas_g394	Acas_g5748	Acas_g6092	Acas_g6172	Acas_g6455	Acas_g7044	Acas_g8522	Acas_g8650 Aque_XP_003382630	Aque_XP_003382718	Aque_XP_003383525	Aque_XP_003384211	Aque_XP_003384212	Aque_XP_003385656	Aque_XP_003386198	Aque_XP_003386542	Aque_XP_003387561	Aque_XP_003389396	Aque_XP_003390645 Atha_AT1G10350	Atha_AT1G21080	Atha_AT1G24120	Atha_AT1G44160	Atha_AT1G56300	Atha_AT1G59725	Atha_AT1G59980	Atha_AT1G68370	Atha_AT1G71000	Atha_AT1G72070	Atha_AT1G72416	Atha_AT1G74250	Atha_AT1G76700	Atha_AT1G77020	Atha_AT1G77930	Atha_AT2G17880	Atha_AT2G20550	Atha_AT2G20560	Atha_AT2G21510	Atha_AT2G33735	Atha_AT2G41000	Atha_AT3G06778	Atha_AT3G08910
OG0000014 Acas_g10194	Acas_g10508	Acas_g10591	Acas_g10683	Acas_g10791	Acas_g10905	Acas_g1103	Acas_g11355	Acas_g1162	Acas_g12046	Acas_g12419	Acas_g12462	Acas_g12467	Acas_g12619	Acas_g12736	Acas_g12846	Acas_g13190	Acas_g13206	Acas_g1339	Acas_g13495	Acas_g13553	Acas_g14261	Acas_g1452	Acas_g14717	Acas_g15366	Acas_g1549	Acas_g15615	Acas_g15974	Acas_g18176	Acas_g1858	Acas_g1889	Acas_g1982	Acas_g2060	Acas_g2162	Acas_g2289	Acas_g2632	Acas_g2664	Acas_g2738	Acas_g2755	Acas_g2976	Acas_g3140	Acas_g322	Acas_g3229	Acas_g3314	Acas_g3565	Acas_g4398	Acas_g5214	Acas_g5577	Acas_g578	Acas_g6064
OG0000015 Acas_g10974	Acas_g10982	Acas_g11046	Acas_g1921	Acas_g2208	Acas_g2715	Acas_g4145	Acas_g5145	Acas_g5195	Acas_g5732	Acas_g8118	Acas_g8602	Acas_g9820 Aque_XP_003382394	Aque_XP_003383221	Aque_XP_003383392	Aque_XP_003383460	Aque_XP_003383677	Aque_XP_003384128	Aque_XP_003384166	Aque_XP_003384648	Aque_XP_003386915	Aque_XP_003387715	Aque_XP_003388213	Aque_XP_003388242	Aque_XP_003388415	Aque_XP_003388416	Aque_XP_003390080	Aque_XP_003390513 Atha_AT1G08650	Atha_AT1G12680	Atha_AT1G18890	Atha_AT1G35670	Atha_AT1G49180	Atha_AT1G50700	Atha_AT1G61950	Atha_AT1G74740	Atha_AT1G76040	Atha_AT2G17290	Atha_AT2G17890	Atha_AT2G31500	Atha_AT2G35890	Atha_AT2G37840	Atha_AT2G38910	Atha_AT2G41860	Atha_AT3G04530	Atha_AT3G10660	Atha_AT3G20410	Atha_AT3G51850	Atha_AT3G53930	Atha_AT3G57530	Atha_AT3G61960
OG0000016 Acas_g10074	Acas_g10097	Acas_g10863	Acas_g2156	Acas_g3257	Acas_g3650	Acas_g5820	Acas_g6348	Acas_g7246	Acas_g7694	Acas_g8102	Acas_g844 Aque_XP_003383668	Aque_XP_003384025	Aque_XP_003384814	Aque_XP_003385239	Aque_XP_003385651	Aque_XP_003387151	Aque_XP_003387156	Aque_XP_003387841	Aque_XP_003388457	Aque_XP_003389555	Aque_XP_003389910	Aque_XP_003390146	Aque_XP_003390354	Aque_XP_003390812 Atha_AT1G01080	Atha_AT1G07350	Atha_AT1G17640	Atha_AT1G18630	Atha_AT1G20880	Atha_AT1G22330	Atha_AT1G22910	Atha_AT1G33470	Atha_AT1G48920	Atha_AT1G55310	Atha_AT1G58470	Atha_AT1G60000	Atha_AT1G71800	Atha_AT1G73530	Atha_AT1G73840	Atha_AT1G74230	Atha_AT1G76460	Atha_AT1G78260	Atha_AT2G14160	Atha_AT2G21660	Atha_AT2G21690	Atha_AT2G22090	Atha_AT2G22100	Atha_AT2G33410	Atha_AT2G37220	Atha_AT2G37510
OG0000017 Acas_g10223	Acas_g13647	Acas_g1534	Acas_g1535	Acas_g6117	Acas_g9643 Aque_XP_003382375	Aque_XP_003382899	Aque_XP_003382900	Aque_XP_003383483	Aque_XP_003385178	Aque_XP_003385900	Aque_XP_003386153	Aque_XP_003386289	Aque_XP_003386506	Aque_XP_003386953	Aque_XP_003387044	Aque_XP_003388190	Aque_XP_003388832	Aque_XP_003389121	Aque_XP_003389132	Aque_XP_003390059	Aque_XP_003391364	Aque_XP_003391409	Aque_XP_003391513	Aque_XP_003391810	Aque_XP_003391898	Aque_XP_003391942	Aque_XP_003392099 Atha_AT1G04120	Atha_AT1G30400	Atha_AT1G30410	Atha_AT1G30420	Atha_AT1G71330	Atha_AT2G07680	Atha_AT2G34660	Atha_AT2G47800	Atha_AT3G13080	Atha_AT3G13090	Atha_AT3G13100	Atha_AT3G21250	Atha_AT3G59140	Atha_AT3G60160	Atha_AT3G60970	Atha_AT3G62700 Awhi_Unigene13034_m8444	Awhi_Unigene13260_m8606	Awhi_Unigene19584_m13278	Awhi_Unigene31439_m18886	Awhi_Unigene32774_m20201	Awhi_Unigene3672_m2738	Awhi_Unigene37220_m24097	Awhi_Unigene40295_m25770
OG0000018 Acas_g15591	Acas_g1657	Acas_g1942	Acas_g1944	Acas_g1964	Acas_g2553	Acas_g2648	Acas_g2841	Acas_g2975	Acas_g3013	Acas_g3249	Acas_g4864	Acas_g4868	Acas_g4869	Acas_g4925	Acas_g5724	Acas_g6438	Acas_g6493	Acas_g6638	Acas_g7504	Acas_g7706	Acas_g8157	Acas_g9713 Aque_XP_003382582	Aque_XP_003382584	Aque_XP_003383194	Aque_XP_003384956	Aque_XP_003386157	Aque_XP_003386170	Aque_XP_003387351	Aque_XP_003387522	Aque_XP_003387569	Aque_XP_003387637	Aque_XP_003387758	Aque_XP_003389642 Atha_AT1G01140	Atha_AT1G29230	Atha_AT1G30270	Atha_AT1G48260	Atha_AT1G78290	Atha_AT2G25090	Atha_AT2G26980	Atha_AT2G30360	Atha_AT2G34180	Atha_AT2G38490	Atha_AT3G01090	Atha_AT3G17510	Atha_AT3G23000	Atha_AT3G29160	Atha_AT3G50500	Atha_AT4G14580	Atha_AT4G18700
OG0000019 Acas_g10991	Acas_g11170	Acas_g1119	Acas_g11326	Acas_g11351	Acas_g11492	Acas_g11547	Acas_g11863	Acas_g12830	Acas_g13662	Acas_g13749	Acas_g13750	Acas_g13948	Acas_g14242	Acas_g14379	Acas_g15033	Acas_g15162	Acas_g16998	Acas_g18171	Acas_g18183	Acas_g18187	Acas_g18189	Acas_g18222	Acas_g18660	Acas_g2219	Acas_g247	Acas_g249	Acas_g252	Acas_g254	Acas_g2600	Acas_g2601	Acas_g2652	Acas_g2671	Acas_g2761	Acas_g2763	Acas_g2798	Acas_g2942	Acas_g2982	Acas_g3448	Acas_g3450	Acas_g3487	Acas_g3603	Acas_g3637	Acas_g4668	Acas_g4988	Acas_g5435	Acas_g5436	Acas_g596	Acas_g5989	Acas_g7041
OG0000020 Acas_g11075	Acas_g11084	Acas_g11438	Acas_g11439	Acas_g11607	Acas_g11759	Acas_g13210	Acas_g1538	Acas_g165	Acas_g1872	Acas_g2605	Acas_g2649	Acas_g2764	Acas_g3227	Acas_g4200	Acas_g4730	Acas_g500	Acas_g5180	Acas_g5568	Acas_g566	Acas_g5952	Acas_g7099	Acas_g815	Acas_g8321	Acas_g9104	Acas_g9950 Aque_XP_003383159	Aque_XP_003383215	Aque_XP_003383473	Aque_XP_003383893	Aque_XP_003384101	Aque_XP_003385366	Aque_XP_003385824	Aque_XP_003385862	Aque_XP_003386171	Aque_XP_003386354	Aque_XP_003386454	Aque_XP_003388293	Aque_XP_003389950 Atha_AT1G05100	Atha_AT1G07150	Atha_AT1G09000	Atha_AT1G23700	Atha_AT1G53165	Atha_AT1G53570	Atha_AT1G54960	Atha_AT1G63700	Atha_AT1G69220	Atha_AT1G70430	Atha_AT1G79640	Atha_AT2G30040	Atha_AT2G32510
OG0000021 Acas_g4224	Acas_g4225	Acas_g4268	Acas_g4844	Acas_g6236	Acas_g9655 Aque_XP_003383238	Aque_XP_003383593	Aque_XP_003384269	Aque_XP_003384270	Aque_XP_003385159	Aque_XP_003385530	Aque_XP_003385550	Aque_XP_003385821	Aque_XP_003387397	Aque_XP_003387633	Aque_XP_003388561 Awhi_Unigene11596_m7580	Awhi_Unigene41102_m26262 Cang_116244	Cang_121092	Cang_126334	Cang_133119	Cang_154381	Cang_409340	Cang_73564	Cang_74699	Cang_76552	Cang_80945 Cfra_1947T1 Clim_g2123	Clim_g5678	Clim_g5704	Clim_g5808	Clim_g5904	Clim_g6809 Cowc_CAOG_02000	Cowc_CAOG_02457	Cowc_CAOG_09003 Nk52_evm10s62	Nk52_evm11s1763	Nk52_evm11s237	Nk52_evm11s2474	Nk52_evm12s564	Nk52_evm135s226	Nk52_evm14s153	Nk52_evm14s221	Nk52_evm15s216	Nk52_evm16s1485	Nk52_evm16s2355	Nk52_evm16s2402	Nk52_evm16s48	Nk52_evm17s2355	Nk52_evm17s241	Nk52_evm18s1705	Nk52_evm1s1262	Nk52_evm1s2
OG0000022 Acas_g11193	Acas_g11448	Acas_g11727	Acas_g1367	Acas_g14352	Acas_g14427	Acas_g16094	Acas_g2349	Acas_g271	Acas_g2871	Acas_g3734	Acas_g3755	Acas_g4151	Acas_g4153	Acas_g5755	Acas_g6547	Acas_g6993	Acas_g7230	Acas_g7319	Acas_g7399	Acas_g7497	Acas_g7916	Acas_g8723	Acas_g8895	Acas_g9561 Aque_XP_003382481	Aque_XP_003382902	Aque_XP_003382916	Aque_XP_003383169	Aque_XP_003384555	Aque_XP_003384904	Aque_XP_003385759	Aque_XP_003387861	Aque_XP_003389380	Aque_XP_003392158 Atha_AT1G06210	Atha_AT1G20110	Atha_AT1G21380	Atha_AT1G61690	Atha_AT1G76970	Atha_AT2G30880	Atha_AT2G38410	Atha_AT3G08790	Atha_AT4G32760	Atha_AT5G01760	Atha_AT5G16880	Atha_AT5G63640 Awhi_Unigene12156_m7859	Awhi_Unigene12889_m8338	Awhi_Unigene13314_m8646	Awhi_Unigene14663_m9235	Awhi_Unigene14751_m9284	Awhi_Unigene15268_m9569
OG0000023 Acas_g10051	Acas_g10987	Acas_g13585	Acas_g13940	Acas_g13952	Acas_g15646	Acas_g1691	Acas_g1774	Acas_g2376	Acas_g2385	Acas_g31	Acas_g3715	Acas_g3836	Acas_g4060	Acas_g4167	Acas_g4712	Acas_g4754	Acas_g6065	Acas_g6176	Acas_g6191	Acas_g657	Acas_g6607	Acas_g7480	Acas_g9560 Aque_XP_003382779	Aque_XP_003383069	Aque_XP_003383232	Aque_XP_003383234	Aque_XP_003383862	Aque_XP_003385617	Aque_XP_003386203	Aque_XP_003387566	Aque_XP_003389327	Aque_XP_003391816 Atha_AT2G28840	Atha_AT5G07270	Atha_AT5G14230	Atha_AT5G57740 Awhi_Unigene1078_m1066	Awhi_Unigene11427_m7499	Awhi_Unigene13116_m8500	Awhi_Unigene16926_m10677	Awhi_Unigene17026_m10777	Awhi_Unigene17837_m11752	Awhi_Unigene18339_m12342	Awhi_Unigene22402_m15128	Awhi_Unigene2281_m1618	Awhi_Unigene229_m183	Awhi_Unigene26_m28	Awhi_Unigene30563_m18625	Awhi_Unigene31884_m19343	Awhi_Unigene32034_m19478	Awhi_Unigene32118_m19571
OG0000024 Acas_g10020	Acas_g1074	Acas_g10918	Acas_g11122	Acas_g11396	Acas_g11459	Acas_g11916	Acas_g12124	Acas_g1237	Acas_g12390	Acas_g13351	Acas_g13362	Acas_g13374	Acas_g14878	Acas_g15725	Acas_g15797	Acas_g1815	Acas_g1835	Acas_g1902	Acas_g2014	Acas_g2043	Acas_g3163	Acas_g3169	Acas_g3505	Acas_g395	Acas_g4553	Acas_g4576	Acas_g5352	Acas_g5770	Acas_g5896	Acas_g5936	Acas_g6990	Acas_g7637	Acas_g8405	Acas_g8831	Acas_g8912	Acas_g9162	Acas_g9272	Acas_g9553	Acas_g9556 Aque_XP_003383542	Aque_XP_003383757	Aque_XP_003387856	Aque_XP_003388359	Aque_XP_003389925	Aque_XP_003391959 Atha_AT1G19880	Atha_AT1G27060	Atha_AT1G65920	Atha_AT1G69710	Atha_AT1G76950	Atha_AT3G02300
OG0000025 Acas_g11559	Acas_g11781	Acas_g12007	Acas_g13143	Acas_g13144	Acas_g13314	Acas_g13937	Acas_g15094	Acas_g15203	Acas_g15409	Acas_g1547	Acas_g15682	Acas_g15875	Acas_g18151	Acas_g1866	Acas_g2746	Acas_g3152	Acas_g4528	Acas_g4764	Acas_g4789	Acas_g5351	Acas_g5498	Acas_g5910	Acas_g6535	Acas_g672	Acas_g6805	Acas_g6949	Acas_g7439	Acas_g7578	Acas_g7596	Acas_g7660	Acas_g7925	Acas_g8462	Acas_g8840	Acas_g9497 Aque_XP_003382594	Aque_XP_003382848	Aque_XP_003383381	Aque_XP_003383382	Aque_XP_003383734	Aque_XP_003384218	Aque_XP_003385818	Aque_XP_003386167	Aque_XP_003386262	Aque_XP_003386750	Aque_XP_003386826	Aque_XP_003386828	Aque_XP_003387363	Aque_XP_003387364	Aque_XP_003387762	Aque_XP_003387813
OG0000026 Acas_g10396	Acas_g10432	Acas_g1173	Acas_g1175	Acas_g13349	Acas_g137	Acas_g14556	Acas_g14888	Acas_g17690	Acas_g2502	Acas_g2583	Acas_g324	Acas_g3527	Acas_g3679	Acas_g3922	Acas_g3930	Acas_g4071	Acas_g4117	Acas_g4129	Acas_g425	Acas_g4443	Acas_g5239	Acas_g526	Acas_g5603	Acas_g6538	Acas_g7254	Acas_g7310	Acas_g794	Acas_g8927	Acas_g8932	Acas_g9031	Acas_g9404	Acas_g9628 Aque_XP_003383224	Aque_XP_003383580	Aque_XP_003384001	Aque_XP_003384303	Aque_XP_003384548	Aque_XP_003385509	Aque_XP_003385938	Aque_XP_003386475	Aque_XP_003386880	Aque_XP_003387285	Aque_XP_003387455	Aque_XP_003389213	Aque_XP_003389388	Aque_XP_003391072 Atha_AT1G01640	Atha_AT1G21780	Atha_AT1G55760	Atha_AT2G05330	Atha_AT2G36370
OG0000027 Acas_g1100	Acas_g1354 Aque_XP_003383220	Aque_XP_003383749	Aque_XP_003383750	Aque_XP_003384062	Aque_XP_003384855	Aque_XP_003385376	Aque_XP_003386332	Aque_XP_003389392	Aque_XP_003389393	Aque_XP_003389836	Aque_XP_003389838 Atha_AT1G05030	Atha_AT1G07340	Atha_AT1G08890	Atha_AT1G08900	Atha_AT1G08920	Atha_AT1G08930	Atha_AT1G11260	Atha_AT1G19450	Atha_AT1G30220	Atha_AT1G34580	Atha_AT1G50310	Atha_AT1G54730	Atha_AT1G67300	Atha_AT1G75220	Atha_AT1G77210	Atha_AT1G79820	Atha_AT2G16120	Atha_AT2G16130	Atha_AT2G18480	Atha_AT2G20780	Atha_AT2G35740	Atha_AT2G43330	Atha_AT2G48020	Atha_AT3G03090	Atha_AT3G05150	Atha_AT3G05155	Atha_AT3G05160	Atha_AT3G05165	Atha_AT3G05400	Atha_AT3G05960	Atha_AT3G18830	Atha_AT3G19930	Atha_AT3G19940	Atha_AT3G20460	Atha_AT4G02050	Atha_AT4G04750	Atha_AT4G04760	Atha_AT4G16480	Atha_AT4G21480
OG0000028 Acas_g10275	Acas_g11096	Acas_g12831	Acas_g14058	Acas_g14299	Acas_g14782	Acas_g15143	Acas_g15393	Acas_g1573	Acas_g16062	Acas_g1790	Acas_g1949	Acas_g4319	Acas_g4586	Acas_g5628	Acas_g6233	Acas_g676	Acas_g738	Acas_g9650	Acas_g977	Acas_g978 Aque_XP_003382370	Aque_XP_003382912	Aque_XP_003382913	Aque_XP_003385799	Aque_XP_003385802	Aque_XP_003386572	Aque_XP_003386755	Aque_XP_003388846	Aque_XP_003391601 Atha_AT1G03370	Atha_AT1G05500	Atha_AT1G20080	Atha_AT1G23140	Atha_AT1G48590	Atha_AT1G53590	Atha_AT1G66360	Atha_AT1G70790	Atha_AT1G70800	Atha_AT1G70810	Atha_AT1G73580	Atha_AT2G01540	Atha_AT2G20990	Atha_AT2G21010	Atha_AT2G21040	Atha_AT3G14590	Atha_AT3G17980	Atha_AT3G18370	Atha_AT3G55470	Atha_AT3G61050	Atha_AT4G00467	Atha_AT5G04220
OG0000029 Acas_g10644	Acas_g10870	Acas_g1208	Acas_g12568	Acas_g13819	Acas_g14333	Acas_g14645	Acas_g17803	Acas_g2218	Acas_g2275	Acas_g2626	Acas_g2627	Acas_g2803	Acas_g4359	Acas_g466	Acas_g4846	Acas_g6619	Acas_g7400	Acas_g8348	Acas_g9223	Acas_g9544 Aque_XP_003382719	Aque_XP_003382720	Aque_XP_003382721	Aque_XP_003382834	Aque_XP_003383103	Aque_XP_003383111	Aque_XP_003383669	Aque_XP_003383672	Aque_XP_003383725	Aque_XP_003383726	Aque_XP_003383727	Aque_XP_003383728	Aque_XP_003384331	Aque_XP_003385986	Aque_XP_003386471	Aque_XP_003387854	Aque_XP_003388867	Aque_XP_003388868	Aque_XP_003389037	Aque_XP_003389586	Aque_XP_003389944	Aque_XP_003390182	Aque_XP_003391202 Atha_AT1G06260	Atha_AT1G09850	Atha_AT1G20850	Atha_AT1G29080	Atha_AT1G29090	Atha_AT1G29110	Atha_AT1G47128	Atha_AT2G21430
OG0000030 Acas_g2238	Acas_g5775	Acas_g9622 Aque_XP_003384473	Aque_XP_003385240	Aque_XP_003385750	Aque_XP_003386333 Atha_AT1G16370	Atha_AT1G16390	Atha_AT1G20840	Atha_AT1G73220	Atha_AT1G79360	Atha_AT1G79410	Atha_AT3G13050	Atha_AT3G20660	Atha_AT3G51490 Awhi_Unigene1131_m1115	Awhi_Unigene14508_m9148	Awhi_Unigene15623_m9762	Awhi_Unigene19136_m12857	Awhi_Unigene19137_m12858	Awhi_Unigene42569_m27082	Awhi_Unigene4280_m3032	Awhi_Unigene6140_m3515 Cfra_3006T1	Cfra_6371T1	Cfra_7885T1 Clim_g2500	Clim_g901 Cowc_CAOG_07649	Cowc_CAOG_08072	Cowc_CAOG_08371 Nk52_evm16s2622	Nk52_evm20s147	Nk52_evm38s1671 Dmel_FBpp0070178	Dmel_FBpp0070944	Dmel_FBpp0072106	Dmel_FBpp0076737	Dmel_FBpp0078124	Dmel_FBpp0078127	Dmel_FBpp0078128	Dmel_FBpp0078522	Dmel_FBpp0080925	Dmel_FBpp0081788	Dmel_FBpp0081790	Dmel_FBpp0082450	Dmel_FBpp0082451	Dmel_FBpp0082452	Dmel_FBpp0082707	Dmel_FBpp0082730	Dmel_FBpp0083191	Dmel_FBpp0083193	Dmel_FBpp0083194	Dmel_FBpp0083217	Dmel_FBpp0083258	Dmel_FBpp0083599	Dmel_FBpp0083982
OG0000031 Acas_g10618	Acas_g11880	Acas_g12651	Acas_g12950	Acas_g13118	Acas_g13843	Acas_g13932	Acas_g1449	Acas_g1560	Acas_g1837	Acas_g2037	Acas_g205	Acas_g5382	Acas_g6163	Acas_g6613	Acas_g7928	Acas_g9362	Acas_g9693	Acas_g9824 Aque_XP_003382828	Aque_XP_003382837	Aque_XP_003383212	Aque_XP_003384926	Aque_XP_003385348	Aque_XP_003386029	Aque_XP_003386276	Aque_XP_003386525	Aque_XP_003386902	Aque_XP_003388016	Aque_XP_003388120	Aque_XP_003388838	Aque_XP_003389506	Aque_XP_003390292 Atha_AT1G04160	Atha_AT1G04600	Atha_AT1G08730	Atha_AT1G17580	Atha_AT1G50360	Atha_AT1G54560	Atha_AT2G20290	Atha_AT2G31900	Atha_AT2G33240	Atha_AT3G19960	Atha_AT3G58160	Atha_AT4G27370	Atha_AT4G28710	Atha_AT4G33200	Atha_AT5G20450	Atha_AT5G20470	Atha_AT5G20490	Atha_AT5G43900	Atha_AT5G54280 Awhi_Unigene161_m138
OG0000032 Acas_g10901	Acas_g10915	Acas_g11523	Acas_g12756	Acas_g13044	Acas_g15298	Acas_g16010	Acas_g3165	Acas_g3442	Acas_g3517	Acas_g3877	Acas_g7556	Acas_g8129	Acas_g8648	Acas_g8942	Acas_g9193 Aque_XP_003382642	Aque_XP_003382643	Aque_XP_003382926	Aque_XP_003388306	Aque_XP_003388319	Aque_XP_003388381	Aque_XP_003390482	Aque_XP_003390483 Atha_AT1G12310	Atha_AT1G18210	Atha_AT1G18530	Atha_AT1G24620	Atha_AT1G32250	Atha_AT1G62820	Atha_AT1G66400	Atha_AT1G66410	Atha_AT1G73630	Atha_AT1G76640	Atha_AT1G76650	Atha_AT2G27030	Atha_AT2G36180	Atha_AT2G41090	Atha_AT2G41100	Atha_AT2G41110	Atha_AT2G43290	Atha_AT3G01830	Atha_AT3G03000	Atha_AT3G03400	Atha_AT3G03410	Atha_AT3G22930	Atha_AT3G24110	Atha_AT3G25600	Atha_AT3G43810	Atha_AT3G50360	Atha_AT3G50770	Atha_AT3G51920
OG0000033 Acas_g1042	Acas_g1293	Acas_g13311	Acas_g13754	Acas_g14052	Acas_g14149	Acas_g14507	Acas_g14992	Acas_g15123	Acas_g15562	Acas_g15773	Acas_g16338	Acas_g1673	Acas_g16837	Acas_g17200	Acas_g6557	Acas_g7830	Acas_g8207 Aque_XP_003382408	Aque_XP_003382885	Aque_XP_003382937	Aque_XP_003382938	Aque_XP_003383898	Aque_XP_003384376	Aque_XP_003385126	Aque_XP_003386197	Aque_XP_003387068 Atha_AT1G18450	Atha_AT1G49240	Atha_AT2G37620	Atha_AT2G42090	Atha_AT2G42100	Atha_AT2G42170	Atha_AT3G12110	Atha_AT3G18780	Atha_AT3G33520	Atha_AT3G46520	Atha_AT3G60830	Atha_AT5G09810	Atha_AT5G59370 Awhi_Unigene16725_m10466	Awhi_Unigene17144_m10910	Awhi_Unigene19568_m13264	Awhi_Unigene19998_m13661	Awhi_Unigene19999_m13662	Awhi_Unigene24068_m15749	Awhi_Unigene2848_m2054	Awhi_Unigene28616_m17273	Awhi_Unigene31371_m18822	Awhi_Unigene31766_m19217	Awhi_Unigene33348_m20762	Awhi_Unigene35629_m22724	Awhi_Unigene37034_m23968
OG0000034 Acas_g11150	Acas_g12207	Acas_g12514	Acas_g12714	Acas_g1898	Acas_g238	Acas_g4837	Acas_g4938	Acas_g5096	Acas_g6358	Acas_g6495	Acas_g7237	Acas_g7482	Acas_g7509	Acas_g8032	Acas_g8216	Acas_g8748	Acas_g8877	Acas_g9726	Acas_g9833 Aque_XP_003382463	Aque_XP_003384090	Aque_XP_003384523	Aque_XP_003384531	Aque_XP_003385894	Aque_XP_003388595	Aque_XP_003389068	Aque_XP_003391029	Aque_XP_003391436 Atha_AT1G07440	Atha_AT1G07450	Atha_AT1G10310	Atha_AT1G24360	Atha_AT1G52340	Atha_AT1G54870	Atha_AT1G62610	Atha_AT1G63380	Atha_AT2G07640	Atha_AT2G17845	Atha_AT2G29150	Atha_AT2G29170	Atha_AT2G29260	Atha_AT2G29290	Atha_AT2G29300	Atha_AT2G29310	Atha_AT2G29320	Atha_AT2G29330	Atha_AT2G29340	Atha_AT2G29350	Atha_AT2G29360	Atha_AT2G29370	Atha_AT2G30670
OG0000035 Acas_g10266	Acas_g10299	Acas_g10838	Acas_g10856	Acas_g10924	Acas_g12873	Acas_g1347	Acas_g14298	Acas_g14924	Acas_g16615	Acas_g2100	Acas_g2494	Acas_g253	Acas_g3038	Acas_g3401	Acas_g3888	Acas_g4397	Acas_g4532	Acas_g4662	Acas_g4751	Acas_g5892	Acas_g6372	Acas_g6801	Acas_g7000	Acas_g7150	Acas_g962	Acas_g9798	Acas_g9805	Acas_g9937 Aque_XP_003382591	Aque_XP_003382990	Aque_XP_003383099	Aque_XP_003383346	Aque_XP_003384397	Aque_XP_003385354	Aque_XP_003389465	Aque_XP_003389954	Aque_XP_003390200 Atha_AT2G04550	Atha_AT3G06110	Atha_AT3G23610	Atha_AT3G55270	Atha_AT4G18593	Atha_AT5G23720 Awhi_Unigene12386_m8001	Awhi_Unigene14139_m9058	Awhi_Unigene18950_m12690	Awhi_Unigene19815_m13491	Awhi_Unigene19816_m13492	Awhi_Unigene20293_m13916	Awhi_Unigene20294_m13918	Awhi_Unigene21091_m14695	Awhi_Unigene21200_m14735
OG0000036 Acas_g949 Aque_XP_003383941	Aque_XP_003384981	Aque_XP_003387215	Aque_XP_003387874	Aque_XP_003388017	Aque_XP_003388314	Aque_XP_003388315 Awhi_Unigene16289_m10006	Awhi_Unigene19610_m13308	Awhi_Unigene20416_m14038	Awhi_Unigene22431_m15136	Awhi_Unigene25224_m16162	Awhi_Unigene32242_m19696	Awhi_Unigene36800_m23805	Awhi_Unigene5750_m3374	Awhi_Unigene7321_m4374	Awhi_Unigene8850_m6067	Awhi_Unigene9381_m6594 Cang_100788	Cang_104376	Cang_105630	Cang_106793	Cang_107137	Cang_113453	Cang_113737	Cang_122755	Cang_125363	Cang_126183	Cang_128280	Cang_129303	Cang_245053	Cang_33794	Cang_347966	Cang_61103	Cang_99304 Cfra_1308T1	Cfra_6624T1 Clim_g1747	Clim_g1792	Clim_g2970	Clim_g3978 Cowc_CAOG_02444	Cowc_CAOG_03608	Cowc_CAOG_06749	Cowc_CAOG_06953	Cowc_CAOG_07968	Cowc_CAOG_08850 Nk52_evm12s913	Nk52_evm13s1569	Nk52_evm38s293	Nk52_evm94s914 Dmel_FBpp0071314	Dmel_FBpp0071895	Dmel_FBpp0072038	Dmel_FBpp0072063	Dmel_FBpp0072447	Dmel_FBpp0076705
OG0000037 Aque_XP_003384109	Aque_XP_003384275	Aque_XP_003384276	Aque_XP_003384277	Aque_XP_003385808	Aque_XP_003391294 Atha_AT1G01340	Atha_AT1G15990	Atha_AT1G19780	Atha_AT2G23980	Atha_AT2G24610	Atha_AT2G25600	Atha_AT2G26650	Atha_AT2G28260	Atha_AT2G46430	Atha_AT2G46440	Atha_AT2G46450	Atha_AT3G02850	Atha_AT3G17690	Atha_AT3G17700	Atha_AT3G48010	Atha_AT4G01010	Atha_AT4G18290	Atha_AT4G22200	Atha_AT4G30360	Atha_AT4G30560	Atha_AT4G32500	Atha_AT4G32650	Atha_AT5G14870	Atha_AT5G15410	Atha_AT5G37500	Atha_AT5G46240	Atha_AT5G53130	Atha_AT5G54250	Atha_AT5G57940 Awhi_Unigene41154_m26291	Awhi_Unigene9245_m6540 Cang_122074	Cang_124113	Cang_126494	Cang_127121	Cang_136483	Cang_145758	Cang_148523	Cang_149601	Cang_153440	Cang_155610	Cang_205110	Cang_25103	Cang_282122	Cang_342801	Cang_408799	Cang_41146
OG0000038 Acas_g10392	Acas_g10398	Acas_g1058	Acas_g1063	Acas_g10799	Acas_g11033	Acas_g11645	Acas_g12132	Acas_g12672	Acas_g12848	Acas_g13092	Acas_g14341	Acas_g14426	Acas_g14467	Acas_g1467	Acas_g15036	Acas_g15327	Acas_g15462	Acas_g15732	Acas_g15789	Acas_g16282	Acas_g16393	Acas_g17305	Acas_g2055	Acas_g2113	Acas_g2851	Acas_g2973	Acas_g3311	Acas_g3686	Acas_g3860	Acas_g4806	Acas_g4966	Acas_g513	Acas_g525	Acas_g5323	Acas_g6262	Acas_g642	Acas_g8199	Acas_g8268	Acas_g9121	Acas_g9967 Aque_XP_003382950	Aque_XP_003383692	Aque_XP_003385968	Aque_XP_003386375	Aque_XP_003387060	Aque_XP_003387924	Aque_XP_003390272	Aque_XP_003390770	Aque_XP_003390903	Aque_XP_003391324 Atha_AT1G18610
OG0000039 Acas_g11562	Acas_g1715	Acas_g5470	Acas_g8120	Acas_g830	Acas_g9554 Aque_XP_003382741	Aque_XP_003382760	Aque_XP_003382761	Aque_XP_003383058	Aque_XP_003383454	Aque_XP_003383813	Aque_XP_003385315	Aque_XP_003386015	Aque_XP_003386087	Aque_XP_003386448	Aque_XP_003386830	Aque_XP_003387335	Aque_XP_003387406	Aque_XP_003387438	Aque_XP_003388437	Aque_XP_003388438	Aque_XP_003388515	Aque_XP_003388541	Aque_XP_003388679	Aque_XP_003388680	Aque_XP_003388683	Aque_XP_003388684	Aque_XP_003388826	Aque_XP_003388988	Aque_XP_003388994	Aque_XP_003389386	Aque_XP_003389750	Aque_XP_003389751	Aque_XP_003389752	Aque_XP_003389753	Aque_XP_003389761	Aque_XP_003389970	Aque_XP_003389971	Aque_XP_003389972	Aque_XP_003390041	Aque_XP_003390042	Aque_XP_003390054	Aque_XP_003390164	Aque_XP_003390402	Aque_XP_003391056	Aque_XP_003391464	Aque_XP_003391590	Aque_XP_003391612	Aque_XP_003391717	Aque_XP_003391756
OG0000040 Acas_g10103 Aque_XP_003382875	Aque_XP_003383020	Aque_XP_003383228	Aque_XP_003385448	Aque_XP_003385667	Aque_XP_003385719	Aque_XP_003386043	Aque_XP_003387417	Aque_XP_003387418	Aque_XP_003387589	Aque_XP_003388018	Aque_XP_003388831	Aque_XP_003389087	Aque_XP_003389539	Aque_XP_003389851	Aque_XP_003390594	Aque_XP_003390685	Aque_XP_003390762	Aque_XP_003390785	Aque_XP_003390830	Aque_XP_003390884	Aque_XP_003391067	Aque_XP_003391137	Aque_XP_003391747	Aque_XP_003391962	Aque_XP_003391982	Aque_XP_003391986	Aque_XP_003391992 Awhi_Unigene16468_m10167	Awhi_Unigene2535_m1812	Awhi_Unigene2536_m1813	Awhi_Unigene35663_m22754 Cang_117322	Cang_126626	Cang_136489	Cang_137591	Cang_142478	Cang_146932	Cang_27008	Cang_51340	Cang_52846	Cang_62484	Cang_67877 Cfra_0215T1	Cfra_0216T1 Clim_g2582	Clim_g3203 Cowc_CAOG_02097 Nk52_evm107s352	Nk52_evm13s1444	Nk52_evm13s2011	Nk52_evm16s156	Nk52_evm1s1607	Nk52_evm1s338	Nk52_evm21s1400	Nk52_evm26s232
OG0000041 Acas_g535	Acas_g5375	Acas_g5721	Acas_g6228	Acas_g7290	Acas_g9462	Acas_g9725 Aque_XP_003383070	Aque_XP_003383193	Aque_XP_003384202	Aque_XP_003385213	Aque_XP_003387081	Aque_XP_003388161	Aque_XP_003389019	Aque_XP_003389499	Aque_XP_003390187	Aque_XP_003390704	Aque_XP_003392086 Atha_AT1G03740	Atha_AT1G09600	Atha_AT1G18040	Atha_AT1G18670	Atha_AT1G20930	Atha_AT1G33770	Atha_AT1G53050	Atha_AT1G54610	Atha_AT1G57700	Atha_AT1G66750	Atha_AT1G67580	Atha_AT1G71530	Atha_AT1G73690	Atha_AT1G74330	Atha_AT1G76540	Atha_AT2G38620	Atha_AT3G01085	Atha_AT3G05050	Atha_AT3G48750	Atha_AT3G54180	Atha_AT4G10010	Atha_AT4G22940	Atha_AT5G10270	Atha_AT5G39420	Atha_AT5G44290	Atha_AT5G50860	Atha_AT5G63370	Atha_AT5G64960 Awhi_Unigene1034_m997	Awhi_Unigene1034_m998	Awhi_Unigene11966_m7732	Awhi_Unigene15696_m9812	Awhi_Unigene16904_m10656	Awhi_Unigene16951_m10702	Awhi_Unigene19177_m12894
OG0000042 Acas_g10531	Acas_g11650	Acas_g12264	Acas_g12983	Acas_g13230	Acas_g143	Acas_g14469	Acas_g2709	Acas_g2934	Acas_g3866	Acas_g4834	Acas_g5304	Acas_g8176	Acas_g839 Aque_XP_003383316	Aque_XP_003383615	Aque_XP_003383617	Aque_XP_003385711	Aque_XP_003386270	Aque_XP_003386353	Aque_XP_003386789	Aque_XP_003387518	Aque_XP_003387794 Atha_AT2G14255	Atha_AT2G40990	Atha_AT3G04970	Atha_AT3G09320	Atha_AT3G26935	Atha_AT3G48760	Atha_AT3G51390	Atha_AT3G56920	Atha_AT3G56930	Atha_AT3G60800	Atha_AT4G00840	Atha_AT4G22750	Atha_AT4G24630	Atha_AT5G04270	Atha_AT5G05070	Atha_AT5G20350	Atha_AT5G41060	Atha_AT5G50020 Awhi_Unigene12786_m8271	Awhi_Unigene13267_m8611	Awhi_Unigene20886_m14474	Awhi_Unigene20887_m14475	Awhi_Unigene29636_m18149	Awhi_Unigene29637_m18150	Awhi_Unigene33121_m20518	Awhi_Unigene3799_m2838	Awhi_Unigene646_m625 Cang_150404	Cang_24147	Cang_41657	Cang_44894
OG0000043 Acas_g1125	Acas_g1174	Acas_g1187	Acas_g127	Acas_g2498	Acas_g3588	Acas_g3660 Aque_XP_003382362	Aque_XP_003385134	Aque_XP_003385715	Aque_XP_003386587	Aque_XP_003386588	Aque_XP_003386685	Aque_XP_003387479	Aque_XP_003387691	Aque_XP_003387936	Aque_XP_003387974	Aque_XP_003388606	Aque_XP_003388607	Aque_XP_003388625	Aque_XP_003388627	Aque_XP_003389358	Aque_XP_003389886	Aque_XP_003390109	Aque_XP_003390228	Aque_XP_003390229	Aque_XP_003390347	Aque_XP_003390404	Aque_XP_003390890	Aque_XP_003391309	Aque_XP_003391426	Aque_XP_003391528	Aque_XP_003392009 Awhi_Unigene41064_m26235	Awhi_Unigene690_m701 Cang_265224	Cang_29749 Cfra_0224T1	Cfra_2413T1	Cfra_3730T1 Clim_g5338 Cowc_CAOG_04721 Nk52_evm126s226 Ddis_XP_629697	Ddis_XP_637452	Ddis_XP_637687	Ddis_XP_641217	Ddis_XP_644998 Dmel_FBpp0071238	Dmel_FBpp0079210	Dmel_FBpp0080702	Dmel_FBpp0083320	Dmel_FBpp0086838	Dmel_FBpp0113114	Dmel_FBpp0289357 Ehux_195497	Ehux_215858	Ehux_239117	Ehux_239943	Ehux_242540
OG0000044 Acas_g10100	Acas_g10161	Acas_g10363	Acas_g10370	Acas_g11497	Acas_g12424	Acas_g12707	Acas_g12709	Acas_g12746	Acas_g13058	Acas_g13372	Acas_g1484	Acas_g1662	Acas_g17062	Acas_g17616	Acas_g2074	Acas_g2079	Acas_g2434	Acas_g2835	Acas_g2899	Acas_g3794	Acas_g4748	Acas_g5243	Acas_g5570	Acas_g5891	Acas_g5908	Acas_g6197	Acas_g652	Acas_g6785	Acas_g6822	Acas_g7417	Acas_g752	Acas_g760	Acas_g7864	Acas_g8721	Acas_g9152	Acas_g9357	Acas_g9503	Acas_g964	Acas_g9868 Aque_XP_003383013	Aque_XP_003384227	Aque_XP_003385162	Aque_XP_003385284	Aque_XP_003385419	Aque_XP_003386097	Aque_XP_003386099	Aque_XP_003386444	Aque_XP_003388366	Aque_XP_003391597 Awhi_Unigene16350_m10047	Awhi_Unigene16582_m10289
OG0000045 Acas_g10913	Acas_g11013	Acas_g11057	Acas_g11747	Acas_g12440	Acas_g1762	Acas_g1767	Acas_g3589	Acas_g6874	Acas_g7213	Acas_g8245	Acas_g8675	Acas_g9143 Aque_XP_003383969	Aque_XP_003384341	Aque_XP_003385091	Aque_XP_003385181	Aque_XP_003385367	Aque_XP_003385504	Aque_XP_003387834	Aque_XP_003387998	Aque_XP_003389562	Aque_XP_003389610	Aque_XP_003389858	Aque_XP_003390480 Atha_AT1G10870	Atha_AT1G60860	Atha_AT2G35210	Atha_AT2G37550	Atha_AT3G07940	Atha_AT3G17660	Atha_AT3G53710	Atha_AT4G05330	Atha_AT4G17890	Atha_AT4G21160	Atha_AT5G13300	Atha_AT5G46750	Atha_AT5G54310	Atha_AT5G61980 Awhi_Unigene16674_m10396	Awhi_Unigene19186_m12903	Awhi_Unigene19187_m12904	Awhi_Unigene20090_m13740	Awhi_Unigene20091_m13742	Awhi_Unigene28469_m17143	Awhi_Unigene31352_m18799	Awhi_Unigene31919_m19373	Awhi_Unigene36874_m23863	Awhi_Unigene38187_m24811	Awhi_Unigene7296_m4345	Awhi_Unigene7593_m4665	Awhi_Unigene7814_m4906	Awhi_Unigene7896_m5011
OG0000046 Acas_g2735	Acas_g553 Aque_XP_003382744	Aque_XP_003388757	Aque_XP_003388758	Aque_XP_003389195	Aque_XP_003390679	Aque_XP_003392149 Atha_AT1G01540	Atha_AT1G06840	Atha_AT1G07560	Atha_AT1G07870	Atha_AT1G09440	Atha_AT1G09970	Atha_AT1G10620	Atha_AT1G11050	Atha_AT1G11350	Atha_AT1G17540	Atha_AT1G20650	Atha_AT1G23540	Atha_AT1G24030	Atha_AT1G26150	Atha_AT1G49270	Atha_AT1G49730	Atha_AT1G51790	Atha_AT1G51805	Atha_AT1G51820	Atha_AT1G51830	Atha_AT1G51850	Atha_AT1G51860	Atha_AT1G51870	Atha_AT1G51880	Atha_AT1G51890	Atha_AT1G51910	Atha_AT1G52290	Atha_AT1G54820	Atha_AT1G55610	Atha_AT1G56720	Atha_AT1G60800	Atha_AT1G61390	Atha_AT1G61480	Atha_AT1G61860	Atha_AT1G68690	Atha_AT1G70450	Atha_AT1G70460	Atha_AT1G70740	Atha_AT1G72760	Atha_AT1G76360	Atha_AT1G76370	Atha_AT1G79620	Atha_AT1G80640	Atha_AT2G01820
OG0000047 Acas_g15926	Acas_g2981	Acas_g7260	Acas_g7261	Acas_g7536 Aque_XP_003382564	Aque_XP_003382759	Aque_XP_003385721	Aque_XP_003386811	Aque_XP_003386812	Aque_XP_003388158	Aque_XP_003388395	Aque_XP_003388452	Aque_XP_003389457	Aque_XP_003389621	Aque_XP_003389863	Aque_XP_003390750	Aque_XP_003390840	Aque_XP_003391270	Aque_XP_003391533	Aque_XP_003391838 Atha_AT2G41700	Atha_AT3G47730	Atha_AT3G47740	Atha_AT3G47750	Atha_AT3G47760	Atha_AT3G47770	Atha_AT3G47780	Atha_AT3G47790	Atha_AT5G61690	Atha_AT5G61700	Atha_AT5G61730	Atha_AT5G61740 Awhi_Unigene14483_m9132	Awhi_Unigene16461_m10160	Awhi_Unigene25703_m16242	Awhi_Unigene26905_m16504	Awhi_Unigene29559_m18083	Awhi_Unigene29560_m18084	Awhi_Unigene35639_m22735	Awhi_Unigene39449_m25249	Awhi_Unigene926_m931 Cang_104216	Cang_105592	Cang_117702	Cang_126907	Cang_126941	Cang_157642	Cang_23921	Cang_34378	Cang_348377	Cang_40181	Cang_41184	Cang_41185
OG0000048 Acas_g11870	Acas_g12214	Acas_g13007	Acas_g14485	Acas_g14763	Acas_g14899	Acas_g15091	Acas_g15888	Acas_g2459	Acas_g2613	Acas_g3918	Acas_g8736	Acas_g9573 Aque_XP_003382416	Aque_XP_003382417	Aque_XP_003382428	Aque_XP_003383658	Aque_XP_003385271	Aque_XP_003385583	Aque_XP_003385584	Aque_XP_003386819	Aque_XP_003388856	Aque_XP_003388857	Aque_XP_003389773 Atha_AT1G03630	Atha_AT1G64590	Atha_AT2G37540	Atha_AT4G09750	Atha_AT4G11410	Atha_AT4G23420	Atha_AT4G23430	Atha_AT4G24050	Atha_AT4G27440	Atha_AT4G27760	Atha_AT5G02540	Atha_AT5G04070	Atha_AT5G15940	Atha_AT5G50130	Atha_AT5G53090	Atha_AT5G53100	Atha_AT5G54190 Awhi_Unigene13006_m8420	Awhi_Unigene18255_m12243	Awhi_Unigene20306_m13930	Awhi_Unigene31842_m19294	Awhi_Unigene34147_m21177	Awhi_Unigene34291_m21328	Awhi_Unigene3659_m2728	Awhi_Unigene36909_m23890	Awhi_Unigene623_m595	Awhi_Unigene9079_m6359	Awhi_Unigene9080_m6361 Cang_38613	Cang_38615
OG0000049 Acas_g10054	Acas_g10280	Acas_g11443	Acas_g12388	Acas_g13260	Acas_g1748	Acas_g3214	Acas_g4918	Acas_g5626	Acas_g5830	Acas_g9327 Aque_XP_003382543	Aque_XP_003383441	Aque_XP_003384075	Aque_XP_003385228	Aque_XP_003387610	Aque_XP_003387870	Aque_XP_003389819	Aque_XP_003389989	Aque_XP_003390826 Atha_AT1G20810	Atha_AT3G10060	Atha_AT3G12340	Atha_AT3G21640	Atha_AT3G25220	Atha_AT3G25230	Atha_AT3G55520	Atha_AT4G25340	Atha_AT4G39710	Atha_AT5G05420	Atha_AT5G45680	Atha_AT5G48570	Atha_AT5G48580	Atha_AT5G64350 Awhi_Unigene13755_m8947	Awhi_Unigene16599_m10310	Awhi_Unigene16876_m10621	Awhi_Unigene17911_m11828	Awhi_Unigene17912_m11829	Awhi_Unigene19018_m12741	Awhi_Unigene26526_m16387	Awhi_Unigene27747_m16706	Awhi_Unigene31966_m19413	Awhi_Unigene36540_m23639	Awhi_Unigene37589_m24354	Awhi_Unigene37590_m24355	Awhi_Unigene6988_m3992	Awhi_Unigene6989_m3994	Awhi_Unigene7289_m4339	Awhi_Unigene7957_m5079	Awhi_Unigene8841_m6057	Awhi_Unigene9010_m6270	Awhi_Unigene9011_m6271 Cang_126911
OG0000050 Aque_XP_003388736 Dmel_FBpp0070934	Dmel_FBpp0073193	Dmel_FBpp0078132	Dmel_FBpp0082936	Dmel_FBpp0082956	Dmel_FBpp0083092	Dmel_FBpp0083340	Dmel_FBpp0083653	Dmel_FBpp0084834	Dmel_FBpp0084947	Dmel_FBpp0085108	Dmel_FBpp0085761	Dmel_FBpp0085783	Dmel_FBpp0099564	Dmel_FBpp0288722	Dmel_FBpp0288773	Dmel_FBpp0290860 Hsap_ENSP00000176183	Hsap_ENSP00000256906	Hsap_ENSP00000258034	Hsap_ENSP00000258456	Hsap_ENSP00000275198	Hsap_ENSP00000275200	Hsap_ENSP00000275216	Hsap_ENSP00000276198	Hsap_ENSP00000280155	Hsap_ENSP00000286603	Hsap_ENSP00000287907	Hsap_ENSP00000289753	Hsap_ENSP00000298110	Hsap_ENSP00000304501	Hsap_ENSP00000305372	Hsap_ENSP00000306129	Hsap_ENSP00000306662	Hsap_ENSP00000307766	Hsap_ENSP00000308549	Hsap_ENSP00000313661	Hsap_ENSP00000316244	Hsap_ENSP00000322924	Hsap_ENSP00000327652	Hsap_ENSP00000336630	Hsap_ENSP00000337949	Hsap_ENSP00000343782	Hsap_ENSP00000347474	Hsap_ENSP00000353915	Hsap_ENSP00000356908	Hsap_ENSP00000358301	Hsap_ENSP00000358963	Hsap_ENSP00000366506	Hsap_ENSP00000367959	Hsap_ENSP00000368766
OG0000051 Aque_XP_003389217 Awhi_Unigene1015_m970	Awhi_Unigene10271_m7014	Awhi_Unigene10717_m7200	Awhi_Unigene1136_m1118	Awhi_Unigene11833_m7674	Awhi_Unigene1199_m1177	Awhi_Unigene12427_m8030	Awhi_Unigene20854_m14443	Awhi_Unigene20855_m14444	Awhi_Unigene21087_m14692	Awhi_Unigene21623_m14886	Awhi_Unigene21982_m14992	Awhi_Unigene22110_m15040	Awhi_Unigene22350_m15120	Awhi_Unigene23989_m15708	Awhi_Unigene24078_m15756	Awhi_Unigene25568_m16232	Awhi_Unigene29074_m17660	Awhi_Unigene31119_m18716	Awhi_Unigene31401_m18845	Awhi_Unigene31701_m19150	Awhi_Unigene31935_m19388	Awhi_Unigene32115_m19570	Awhi_Unigene37722_m24456	Awhi_Unigene38290_m24885	Awhi_Unigene38888_m25023	Awhi_Unigene40065_m25633	Awhi_Unigene40684_m26018	Awhi_Unigene41208_m26311	Awhi_Unigene4178_m3008	Awhi_Unigene503_m520	Awhi_Unigene5859_m3420	Awhi_Unigene660_m649	Awhi_Unigene6782_m3741	Awhi_Unigene6958_m3947	Awhi_Unigene773_m771	Awhi_Unigene8572_m5769	Awhi_Unigene9228_m6530 Cfra_0840T1	Cfra_1786T1	Cfra_2971T1	Cfra_4427T1	Cfra_8032T1 Clim_g2599	Clim_g4037	Clim_g4370	Clim_g4371	Clim_g4528	Clim_g4711	Clim_g6657 Cowc_CAOG_07761	Cowc_CAOG_09124 Nk52_evm18s225	Nk52_evm1s63
OG0000052 Acas_g10359	Acas_g10868	Acas_g11332	Acas_g12512	Acas_g13720	Acas_g15019	Acas_g15991	Acas_g16505	Acas_g16597	Acas_g306	Acas_g4069	Acas_g6255	Acas_g7286	Acas_g7372	Acas_g8366 Aque_XP_003384146	Aque_XP_003384671	Aque_XP_003384706	Aque_XP_003384707	Aque_XP_003384708	Aque_XP_003384709	Aque_XP_003384710	Aque_XP_003384893	Aque_XP_003384933	Aque_XP_003386463	Aque_XP_003387034	Aque_XP_003391217	Aque_XP_003392151 Awhi_Unigene10344_m7049	Awhi_Unigene10716_m7199	Awhi_Unigene1073_m1056	Awhi_Unigene11255_m7425	Awhi_Unigene11613_m7589	Awhi_Unigene15030_m9445	Awhi_Unigene16448_m10142	Awhi_Unigene16463_m10164	Awhi_Unigene18105_m12076	Awhi_Unigene18201_m12185	Awhi_Unigene18202_m12188	Awhi_Unigene18434_m12443	Awhi_Unigene18747_m12673	Awhi_Unigene195_m161	Awhi_Unigene19979_m13640	Awhi_Unigene20248_m13884	Awhi_Unigene21223_m14745	Awhi_Unigene22022_m15008	Awhi_Unigene22065_m15020	Awhi_Unigene22612_m15182	Awhi_Unigene22744_m15227	Awhi_Unigene23602_m15520	Awhi_Unigene23649_m15536	Awhi_Unigene26164_m16296
OG0000053 Acas_g10330	Acas_g10904	Acas_g11159	Acas_g11314	Acas_g13094	Acas_g477	Acas_g4838	Acas_g4883	Acas_g674	Acas_g7192 Aque_XP_003383572	Aque_XP_003383639	Aque_XP_003385269	Aque_XP_003385298	Aque_XP_003385677	Aque_XP_003387000	Aque_XP_003387826	Aque_XP_003388440 Atha_AT1G20693	Atha_AT1G20696	Atha_AT2G17560	Atha_AT2G34450	Atha_AT3G51880	Atha_AT4G11080	Atha_AT4G23800	Atha_AT4G35570	Atha_AT5G23405	Atha_AT5G23420 Awhi_Unigene8114_m5259 Cang_27746	Cang_30168	Cang_34574	Cang_36128	Cang_62639 Cfra_6144T1	Cfra_7938T1 Clim_g120	Clim_g1224	Clim_g4154	Clim_g668 Cowc_CAOG_00396	Cowc_CAOG_02944	Cowc_CAOG_04765	Cowc_CAOG_05377 Nk52_evm1s2343	Nk52_evm25s1737	Nk52_evm51s745	Nk52_evm62s207	Nk52_evm79s62	Nk52_evm8s559 Ddis_XP_641584	Ddis_XP_646657 Dmel_FBpp0071235	Dmel_FBpp0071501	Dmel_FBpp0071590	Dmel_FBpp0071625	Dmel_FBpp0072066	Dmel_FBpp0074818	Dmel_FBpp0075488	Dmel_FBpp0075489
OG0000054 Acas_g11539	Acas_g12089	Acas_g12183	Acas_g13072	Acas_g13557	Acas_g13658	Acas_g13757	Acas_g15047	Acas_g15220	Acas_g16396	Acas_g17028	Acas_g18581	Acas_g3236	Acas_g4013	Acas_g4910	Acas_g5136	Acas_g6699	Acas_g7059	Acas_g7060	Acas_g7061	Acas_g7594 Aque_XP_003387241 Awhi_Unigene35961_m23065 Cowc_CAOG_00569	Cowc_CAOG_04951	Cowc_CAOG_05396 Ddis_XP_635153	Ddis_XP_638122	Ddis_XP_638123	Ddis_XP_639223	Ddis_XP_639249	Ddis_XP_641615	Ddis_XP_642939 Dmel_FBpp0070594	Dmel_FBpp0071604	Dmel_FBpp0071746	Dmel_FBpp0072195	Dmel_FBpp0075735	Dmel_FBpp0075736	Dmel_FBpp0078010	Dmel_FBpp0079329	Dmel_FBpp0079353	Dmel_FBpp0079354	Dmel_FBpp0079434	Dmel_FBpp0080324	Dmel_FBpp0081064	Dmel_FBpp0081065	Dmel_FBpp0081068	Dmel_FBpp0081069	Dmel_FBpp0081070	Dmel_FBpp0081071	Dmel_FBpp0081073	Dmel_FBpp0081074	Dmel_FBpp0081077	Dmel_FBpp0081815
OG0000055 Acas_g1036	Acas_g1341	Acas_g1342	Acas_g144	Acas_g17507	Acas_g2420	Acas_g2714	Acas_g278	Acas_g3270	Acas_g3366	Acas_g4736	Acas_g5193	Acas_g7471	Acas_g8232 Aque_XP_003385237	Aque_XP_003387828	Aque_XP_003387832	Aque_XP_003388052	Aque_XP_003388330	Aque_XP_003388331	Aque_XP_003388875 Awhi_Unigene12166_m7863	Awhi_Unigene14411_m9099	Awhi_Unigene15577_m9733	Awhi_Unigene19150_m12868	Awhi_Unigene19838_m13507	Awhi_Unigene20041_m13697	Awhi_Unigene20724_m14320	Awhi_Unigene23335_m15395	Awhi_Unigene23706_m15564	Awhi_Unigene29712_m18213	Awhi_Unigene3395_m2512	Awhi_Unigene34124_m21154	Awhi_Unigene34244_m21284	Awhi_Unigene35521_m22624	Awhi_Unigene35795_m22886	Awhi_Unigene37057_m23983	Awhi_Unigene6811_m3775	Awhi_Unigene7823_m4918 Cang_127235	Cang_127286	Cang_127517	Cang_289690	Cang_40018 Cfra_2239T1	Cfra_3228T1	Cfra_3835T1	Cfra_8123T1 Clim_g138	Clim_g2623	Clim_g2800	Clim_g5541 Cowc_CAOG_00751	Cowc_CAOG_00929	Cowc_CAOG_02521	Cowc_CAOG_04083
OG0000056 Acas_g11078	Acas_g13923	Acas_g13924	Acas_g16850	Acas_g17899	Acas_g18303	Acas_g3228	Acas_g3662	Acas_g3846	Acas_g423	Acas_g4421	Acas_g4422	Acas_g5275	Acas_g5276	Acas_g5515	Acas_g6251	Acas_g6773	Acas_g7102	Acas_g9973 Aque_XP_003383729	Aque_XP_003385749	Aque_XP_003386117	Aque_XP_003386205	Aque_XP_003386294	Aque_XP_003386593 Atha_AT1G24150	Atha_AT1G31810	Atha_AT1G42980	Atha_AT1G59910	Atha_AT1G70140	Atha_AT2G25050	Atha_AT2G43800	Atha_AT3G05470	Atha_AT3G07540	Atha_AT3G25500	Atha_AT3G32400	Atha_AT4G15200	Atha_AT5G07650	Atha_AT5G07740	Atha_AT5G07760	Atha_AT5G07770	Atha_AT5G07780	Atha_AT5G48360	Atha_AT5G54650	Atha_AT5G58160	Atha_AT5G67470 Awhi_Unigene13506_m8775	Awhi_Unigene17795_m11696	Awhi_Unigene18170_m12154	Awhi_Unigene2060_m1444	Awhi_Unigene20611_m14215	Awhi_Unigene20836_m14424	Awhi_Unigene31781_m19232
OG0000057 Atha_AT1G01190	Atha_AT1G01280	Atha_AT1G11610	Atha_AT1G13080	Atha_AT1G13090	Atha_AT1G13100	Atha_AT1G13110	Atha_AT1G16400	Atha_AT1G16410	Atha_AT1G33720	Atha_AT1G33730	Atha_AT1G58260	Atha_AT1G66540	Atha_AT1G74110	Atha_AT1G74540	Atha_AT1G74550	Atha_AT1G79370	Atha_AT2G02580	Atha_AT2G22330	Atha_AT2G23190	Atha_AT2G23220	Atha_AT2G24180	Atha_AT2G25160	Atha_AT2G30490	Atha_AT2G30750	Atha_AT2G30770	Atha_AT2G40890	Atha_AT2G42250	Atha_AT2G45550	Atha_AT2G45560	Atha_AT2G45570	Atha_AT2G45580	Atha_AT2G46660	Atha_AT3G25180	Atha_AT3G26150	Atha_AT3G26160	Atha_AT3G26170	Atha_AT3G26180	Atha_AT3G26190	Atha_AT3G26200	Atha_AT3G26210	Atha_AT3G26220	Atha_AT3G26230	Atha_AT3G26270	Atha_AT3G26280	Atha_AT3G26290	Atha_AT3G26300	Atha_AT3G26310	Atha_AT3G26320	Atha_AT3G26330
OG0000058 Acas_g10342	Acas_g10764	Acas_g14013	Acas_g2119	Acas_g3478	Acas_g5068	Acas_g5885	Acas_g6190	Acas_g6267 Aque_XP_003383205	Aque_XP_003384151	Aque_XP_003384677	Aque_XP_003384824	Aque_XP_003384871	Aque_XP_003388555	Aque_XP_003389354	Aque_XP_003391208 Atha_AT1G13690	Atha_AT2G15790	Atha_AT2G16600	Atha_AT2G21130	Atha_AT2G29960	Atha_AT2G38730	Atha_AT3G55920	Atha_AT3G56070	Atha_AT3G62030	Atha_AT3G63400	Atha_AT4G34870	Atha_AT4G34960	Atha_AT4G38740	Atha_AT5G13120	Atha_AT5G58710 Awhi_Unigene17073_m10831	Awhi_Unigene18273_m12267	Awhi_Unigene18498_m12516	Awhi_Unigene19001_m12730	Awhi_Unigene23534_m15482	Awhi_Unigene32084_m19533	Awhi_Unigene32353_m19809	Awhi_Unigene34317_m21349	Awhi_Unigene34963_m22037	Awhi_Unigene35437_m22528	Awhi_Unigene37279_m24139 Cang_119903	Cang_126681	Cang_140164	Cang_155830	Cang_29747	Cang_345899	Cang_35465	Cang_62222	Cang_63595	Cang_76288 Cfra_1230T1	Cfra_2042T1
OG0000059 Acas_g10027	Acas_g188	Acas_g4976	Acas_g5708 Atha_AT1G06180	Atha_AT1G08810	Atha_AT1G09540	Atha_AT1G14350	Atha_AT1G16490	Atha_AT1G17950	Atha_AT1G22640	Atha_AT1G25340	Atha_AT1G26780	Atha_AT1G34670	Atha_AT1G35515	Atha_AT1G48000	Atha_AT1G56160	Atha_AT1G57560	Atha_AT1G63910	Atha_AT1G66370	Atha_AT1G66390	Atha_AT1G68320	Atha_AT1G69560	Atha_AT1G73410	Atha_AT1G74080	Atha_AT1G74430	Atha_AT1G74650	Atha_AT1G79180	Atha_AT2G02820	Atha_AT2G13960	Atha_AT2G16720	Atha_AT2G23290	Atha_AT2G25230	Atha_AT2G26960	Atha_AT2G31180	Atha_AT2G32460	Atha_AT2G37630	Atha_AT2G39880	Atha_AT2G47190	Atha_AT2G47460	Atha_AT3G01140	Atha_AT3G02940	Atha_AT3G06490	Atha_AT3G08500	Atha_AT3G09230	Atha_AT3G09370	Atha_AT3G11440	Atha_AT3G12720	Atha_AT3G12820	Atha_AT3G13540	Atha_AT3G18100
OG0000060 Acas_g10047	Acas_g10507	Acas_g14069	Acas_g14503	Acas_g1752	Acas_g2656	Acas_g677	Acas_g8221	Acas_g8541	Acas_g9103	Acas_g9367	Acas_g968 Aque_XP_003382545	Aque_XP_003382997	Aque_XP_003383133	Aque_XP_003383144	Aque_XP_003383151	Aque_XP_003383152	Aque_XP_003383200	Aque_XP_003383772	Aque_XP_003384228	Aque_XP_003384686	Aque_XP_003385358	Aque_XP_003385633	Aque_XP_003386141 Atha_AT1G10630	Atha_AT1G23490	Atha_AT2G15310	Atha_AT2G18390	Atha_AT2G24765	Atha_AT2G47170	Atha_AT3G03120	Atha_AT3G22950	Atha_AT3G62290	Atha_AT5G14670	Atha_AT5G17060 Awhi_Unigene1183_m1164	Awhi_Unigene16859_m10610	Awhi_Unigene20747_m14346	Awhi_Unigene28130_m16847	Awhi_Unigene35946_m23049	Awhi_Unigene36204_m23363	Awhi_Unigene39598_m25345 Cang_115675	Cang_149409	Cang_36314	Cang_396878	Cang_401718	Cang_42228	Cang_70605 Cfra_1317T1	Cfra_2791T1	Cfra_3491T1	Cfra_4237T1	Cfra_4636T1
OG0000061 Acas_g10496	Acas_g12558	Acas_g12567	Acas_g13480	Acas_g13481	Acas_g13691	Acas_g14183	Acas_g14438	Acas_g14890	Acas_g18674 Aque_XP_003386856	Aque_XP_003387166	Aque_XP_003390809 Awhi_Unigene17602_m11463	Awhi_Unigene17603_m11467	Awhi_Unigene39143_m25093	Awhi_Unigene77_m76	Awhi_Unigene864_m880 Cang_48626 Nk52_evm14s1762 Ehux_101419	Ehux_106776	Ehux_202894	Ehux_210232	Ehux_252968	Ehux_259763	Ehux_461135 Mlei_ML329916a Mver_06322	Mver_06923	Mver_07803	Mver_08498	Mver_12216 Mvib_comp118238_c0_seq1_m45190	Mvib_comp15698_c0_seq1_m37790 Nvec_XP_001619572	Nvec_XP_001620826	Nvec_XP_001622533	Nvec_XP_001624017	Nvec_XP_001625301	Nvec_XP_001627585	Nvec_XP_001629871	Nvec_XP_001631218	Nvec_XP_001634194	Nvec_XP_001634991	Nvec_XP_001638194	Nvec_XP_001639092	Nvec_XP_001641964 Pyez_10457_g2506	Pyez_11058_g2638	Pyez_11196_g2677	Pyez_11989_g2853	Pyez_11989_g2854	Pyez_12014_g2863	Pyez_12203_g2921	Pyez_12247_g2927	Pyez_12294_g2940	Pyez_12510_g2983	Pyez_1282_g187	Pyez_1283_g188
OG0000062 Aque_XP_003383994	Aque_XP_003384985	Aque_XP_003385921	Aque_XP_003385961	Aque_XP_003385977	Aque_XP_003386016	Aque_XP_003386017	Aque_XP_003387477	Aque_XP_003387478	Aque_XP_003387878	Aque_XP_003388397	Aque_XP_003388837	Aque_XP_003390253	Aque_XP_003390998 Awhi_Unigene10644_m7171	Awhi_Unigene11935_m7718	Awhi_Unigene13711_m8914	Awhi_Unigene2139_m1505	Awhi_Unigene29519_m18051	Awhi_Unigene29727_m18228	Awhi_Unigene31305_m18743	Awhi_Unigene32326_m19785	Awhi_Unigene32809_m20226	Awhi_Unigene34055_m21087	Awhi_Unigene36202_m23359 Dmel_FBpp0073611	Dmel_FBpp0074382	Dmel_FBpp0078297	Dmel_FBpp0080312	Dmel_FBpp0080313	Dmel_FBpp0080340	Dmel_FBpp0080341	Dmel_FBpp0080342	Dmel_FBpp0080343	Dmel_FBpp0082501	Dmel_FBpp0083770	Dmel_FBpp0084018	Dmel_FBpp0084068	Dmel_FBpp0084070	Dmel_FBpp0271945	Dmel_FBpp0288820 Ehux_110578	Ehux_112120	Ehux_118619	Ehux_195965	Ehux_197110	Ehux_206654	Ehux_209663	Ehux_215150	Ehux_223328	Ehux_227748	Ehux_241658	Ehux_245750
OG0000063 Acas_g10917	Acas_g11579	Acas_g13619	Acas_g15919	Acas_g17336	Acas_g18552	Acas_g3136	Acas_g4335	Acas_g5191	Acas_g7101	Acas_g7626	Acas_g9549 Aque_XP_003382467	Aque_XP_003383888	Aque_XP_003385631	Aque_XP_003387526	Aque_XP_003389288 Atha_AT1G06230	Atha_AT1G17790	Atha_AT1G20670	Atha_AT1G58025	Atha_AT1G61215	Atha_AT1G73150	Atha_AT1G76380	Atha_AT2G34900	Atha_AT2G42150	Atha_AT3G01770	Atha_AT3G27260	Atha_AT3G52280	Atha_AT3G54610	Atha_AT5G10550	Atha_AT5G14270	Atha_AT5G46550	Atha_AT5G55040	Atha_AT5G63320	Atha_AT5G65630 Awhi_Unigene16459_m10157	Awhi_Unigene16460_m10158	Awhi_Unigene19637_m13329	Awhi_Unigene20494_m14111	Awhi_Unigene33180_m20588	Awhi_Unigene33181_m20589	Awhi_Unigene33182_m20590	Awhi_Unigene34167_m21204	Awhi_Unigene35539_m22636	Awhi_Unigene3612_m2681	Awhi_Unigene40883_m26126	Awhi_Unigene8332_m5491	Awhi_Unigene8495_m5682 Cang_101050	Cang_103184	Cang_103471	Cang_103480	Cang_104273
OG0000064 Acas_g2657 Aque_XP_003383557	Aque_XP_003384223	Aque_XP_003384253	Aque_XP_003384256	Aque_XP_003384715	Aque_XP_003385210	Aque_XP_003385399	Aque_XP_003385437	Aque_XP_003387204	Aque_XP_003387403	Aque_XP_003388131	Aque_XP_003388414	Aque_XP_003391728	Aque_XP_003391736 Cowc_CAOG_00001	Cowc_CAOG_00386	Cowc_CAOG_00812	Cowc_CAOG_03413	Cowc_CAOG_03451	Cowc_CAOG_03584	Cowc_CAOG_05333 Ddis_XP_637908 Dmel_FBpp0073584	Dmel_FBpp0085099	Dmel_FBpp0085101	Dmel_FBpp0086614	Dmel_FBpp0086868	Dmel_FBpp0099841	Dmel_FBpp0111988	Dmel_FBpp0288552 Hsap_ENSP00000019103	Hsap_ENSP00000242786	Hsap_ENSP00000253673	Hsap_ENSP00000263281	Hsap_ENSP00000265417	Hsap_ENSP00000272847	Hsap_ENSP00000273352	Hsap_ENSP00000290823	Hsap_ENSP00000296862	Hsap_ENSP00000307831	Hsap_ENSP00000311545	Hsap_ENSP00000319883	Hsap_ENSP00000320180	Hsap_ENSP00000324788	Hsap_ENSP00000327246	Hsap_ENSP00000332900	Hsap_ENSP00000335156	Hsap_ENSP00000340688	Hsap_ENSP00000340943	Hsap_ENSP00000352561	Hsap_ENSP00000356581	Hsap_ENSP00000359686	Hsap_ENSP00000359752	Hsap_ENSP00000359778
OG0000065 Acas_g10116 Aque_XP_003382906	Aque_XP_003383008	Aque_XP_003383072	Aque_XP_003384421	Aque_XP_003384534	Aque_XP_003384559	Aque_XP_003385351	Aque_XP_003386176	Aque_XP_003386177	Aque_XP_003386405	Aque_XP_003387169	Aque_XP_003387576	Aque_XP_003387810	Aque_XP_003390089	Aque_XP_003392087 Atha_AT3G07220	Atha_AT3G07260 Awhi_Unigene10986_m7304	Awhi_Unigene17080_m10837	Awhi_Unigene31746_m19196	Awhi_Unigene51_m54	Awhi_Unigene7591_m4662	Awhi_Unigene9169_m6471 Cang_101444	Cang_129269	Cang_167185	Cang_50369	Cang_55857 Cfra_1692T1	Cfra_4444T1	Cfra_5969T1	Cfra_7414T1	Cfra_8015T1	Cfra_8591T1 Clim_g2046	Clim_g2091	Clim_g3417	Clim_g4000	Clim_g628 Cowc_CAOG_00937	Cowc_CAOG_01766	Cowc_CAOG_05750	Cowc_CAOG_07434 Nk52_evm1s1020	Nk52_evm21s248	Nk52_evm27s249	Nk52_evm30s2209	Nk52_evm3s514	Nk52_evm44s352	Nk52_evm50s914 Dmel_FBpp0070031	Dmel_FBpp0070577	Dmel_FBpp0071036	Dmel_FBpp0071809	Dmel_FBpp0073048	Dmel_FBpp0076609	Dmel_FBpp0077188	Dmel_FBpp0077189
OG0000066 Acas_g11488	Acas_g12671	Acas_g1331	Acas_g13715	Acas_g15417	Acas_g15460	Acas_g15587	Acas_g2197	Acas_g2368	Acas_g2380	Acas_g3764	Acas_g3967	Acas_g4728	Acas_g5636	Acas_g5826	Acas_g6066	Acas_g6137	Acas_g6425	Acas_g6432	Acas_g8027	Acas_g8531	Acas_g8690	Acas_g8863	Acas_g9351	Acas_g9418 Aque_XP_003382532	Aque_XP_003383505	Aque_XP_003383847	Aque_XP_003384184	Aque_XP_003384457	Aque_XP_003385962	Aque_XP_003385965	Aque_XP_003386715	Aque_XP_003386896	Aque_XP_003387180	Aque_XP_003387181	Aque_XP_003387989	Aque_XP_003389947	Aque_XP_003390362 Atha_AT1G20090	Atha_AT1G75840	Atha_AT2G17800	Atha_AT2G44690	Atha_AT3G48040	Atha_AT3G51300	Atha_AT4G28950	Atha_AT4G35020	Atha_AT4G35950	Atha_AT5G45970	Atha_AT5G62880 Awhi_Unigene14526_m9162	Awhi_Unigene15352_m9609	Awhi_Unigene17425_m11235
OG0000067 Acas_g10809	Acas_g10952	Acas_g11113	Acas_g11260	Acas_g13330	Acas_g13515	Acas_g14280	Acas_g15796	Acas_g1627	Acas_g1718	Acas_g17183	Acas_g18460	Acas_g2209	Acas_g2267	Acas_g3316	Acas_g3687	Acas_g377	Acas_g4095	Acas_g5154	Acas_g6494 Aque_XP_003383191	Aque_XP_003383516	Aque_XP_003385685	Aque_XP_003386077	Aque_XP_003386481	Aque_XP_003390138	Aque_XP_003390974	Aque_XP_003391564 Atha_AT1G07160	Atha_AT1G07430	Atha_AT1G17550	Atha_AT1G18030	Atha_AT1G22280	Atha_AT1G34750	Atha_AT1G43900	Atha_AT1G48040	Atha_AT1G67820	Atha_AT1G72770	Atha_AT1G78200	Atha_AT2G20630	Atha_AT2G25070	Atha_AT2G25620	Atha_AT2G29380	Atha_AT2G30020	Atha_AT2G33700	Atha_AT2G34740	Atha_AT2G40180	Atha_AT3G11410	Atha_AT3G15260	Atha_AT3G17250	Atha_AT3G51470	Atha_AT3G62260
OG0000068 Acas_g11544	Acas_g15161	Acas_g441	Acas_g5506	Acas_g6446	Acas_g7149	Acas_g9962 Aque_XP_003384664	Aque_XP_003385238	Aque_XP_003387124	Aque_XP_003387717	Aque_XP_003389474	Aque_XP_003389507	Aque_XP_003390508 Atha_AT1G02580	Atha_AT1G04050	Atha_AT1G05830	Atha_AT1G17770	Atha_AT1G73100	Atha_AT1G76710	Atha_AT1G77300	Atha_AT2G22740	Atha_AT2G23380	Atha_AT2G23740	Atha_AT2G24740	Atha_AT2G33290	Atha_AT2G35160	Atha_AT2G44150	Atha_AT3G03750	Atha_AT3G04380	Atha_AT3G59960	Atha_AT3G61740	Atha_AT3G62500	Atha_AT4G02020	Atha_AT4G13460	Atha_AT4G27910	Atha_AT4G30860	Atha_AT5G04940	Atha_AT5G13960	Atha_AT5G42400	Atha_AT5G43990	Atha_AT5G53430 Awhi_Unigene19169_m12888	Awhi_Unigene29426_m17957	Awhi_Unigene32300_m19757	Awhi_Unigene33307_m20711	Awhi_Unigene33308_m20714	Awhi_Unigene33309_m20717	Awhi_Unigene33310_m20720	Awhi_Unigene35879_m22978	Awhi_Unigene36040_m23166 Cang_102567	Cang_107102	Cang_120080
OG0000069 Acas_g1032	Acas_g10533	Acas_g10534	Acas_g10589	Acas_g10762	Acas_g12527	Acas_g12586	Acas_g1340	Acas_g1371	Acas_g13766	Acas_g138	Acas_g13855	Acas_g14006	Acas_g14914	Acas_g14947	Acas_g1631	Acas_g18162	Acas_g1979	Acas_g243	Acas_g3034	Acas_g3330	Acas_g3414	Acas_g3612	Acas_g4213	Acas_g458	Acas_g4745	Acas_g4835	Acas_g5584	Acas_g6235	Acas_g6448	Acas_g6633	Acas_g6930	Acas_g7067	Acas_g7462	Acas_g8820 Aque_XP_003382501	Aque_XP_003382588	Aque_XP_003385165	Aque_XP_003385199	Aque_XP_003385200	Aque_XP_003385233	Aque_XP_003385248	Aque_XP_003385566	Aque_XP_003386073	Aque_XP_003386147	Aque_XP_003386474	Aque_XP_003386924	Aque_XP_003387236	Aque_XP_003390442 Atha_AT2G29700	Atha_AT5G05710 Awhi_Unigene10373_m7056	Awhi_Unigene11925_m7712
OG0000070 Acas_g10188	Acas_g10189	Acas_g12146	Acas_g13161	Acas_g13651	Acas_g13777	Acas_g14212	Acas_g204	Acas_g529	Acas_g7073	Acas_g8760	Acas_g9592	Acas_g9593	Acas_g9653	Acas_g973 Aque_XP_003382966	Aque_XP_003385421 Atha_AT1G01660	Atha_AT1G01670	Atha_AT1G01680	Atha_AT1G10560	Atha_AT1G20780	Atha_AT1G23030	Atha_AT1G24330	Atha_AT1G27910	Atha_AT1G29340	Atha_AT1G49780	Atha_AT1G56030	Atha_AT1G56040	Atha_AT1G60190	Atha_AT1G66160	Atha_AT1G67530	Atha_AT1G71020	Atha_AT1G76390	Atha_AT2G23140	Atha_AT2G35930	Atha_AT2G45920	Atha_AT3G02840	Atha_AT3G07360	Atha_AT3G07370	Atha_AT3G11840	Atha_AT3G18710	Atha_AT3G19380	Atha_AT3G19895	Atha_AT3G46510	Atha_AT3G47820	Atha_AT3G49060	Atha_AT3G49810	Atha_AT3G52450	Atha_AT3G54790	Atha_AT3G54850	Atha_AT3G61390
OG0000071 Acas_g14966	Acas_g4340	Acas_g4388 Aque_XP_003384377	Aque_XP_003384437	Aque_XP_003386533	Aque_XP_003389411	Aque_XP_003389479 Atha_AT1G50620	Atha_AT1G77250	Atha_AT2G27980	Atha_AT2G36720	Atha_AT2G37520	Atha_AT3G01460	Atha_AT3G08020	Atha_AT3G19510	Atha_AT3G20280	Atha_AT3G52100	Atha_AT3G53680	Atha_AT3G61723	Atha_AT4G29940	Atha_AT5G09790	Atha_AT5G24330	Atha_AT5G59830 Awhi_Unigene11359_m7469	Awhi_Unigene13198_m8558	Awhi_Unigene16883_m10627	Awhi_Unigene20515_m14130	Awhi_Unigene31733_m19183	Awhi_Unigene32694_m20121	Awhi_Unigene35598_m22695	Awhi_Unigene35599_m22697	Awhi_Unigene36792_m23799	Awhi_Unigene39460_m25258	Awhi_Unigene7614_m4684	Awhi_Unigene7670_m4746 Cang_134729	Cang_144189	Cang_56784 Cfra_0062T1	Cfra_0411T1	Cfra_1475T1	Cfra_2964T1	Cfra_4271T1	Cfra_5067T1	Cfra_8272T1 Clim_g1040	Clim_g2812	Clim_g3661	Clim_g4832 Cowc_CAOG_00246	Cowc_CAOG_00506	Cowc_CAOG_03177	Cowc_CAOG_03589	Cowc_CAOG_05818	Cowc_CAOG_08018 Nk52_evm2s393	Nk52_evm38s2152
OG0000072 Aque_XP_003384356	Aque_XP_003384447	Aque_XP_003384608	Aque_XP_003387683	Aque_XP_003387767	Aque_XP_003387768	Aque_XP_003387769	Aque_XP_003387770	Aque_XP_003387771	Aque_XP_003388940	Aque_XP_003388948	Aque_XP_003388949 Awhi_Unigene12186_m7875	Awhi_Unigene2348_m1670	Awhi_Unigene27523_m16688	Awhi_Unigene34434_m21465	Awhi_Unigene34435_m21467	Awhi_Unigene34743_m21798	Awhi_Unigene35841_m22943	Awhi_Unigene35842_m22944	Awhi_Unigene39033_m25053	Awhi_Unigene40472_m25887 Cang_104092	Cang_118071	Cang_119264	Cang_120951	Cang_123782	Cang_123952	Cang_124013	Cang_126934	Cang_132593	Cang_143674	Cang_152079	Cang_153536	Cang_153867	Cang_157530	Cang_160441	Cang_195890	Cang_224983	Cang_273349	Cang_28394	Cang_306264	Cang_32595	Cang_358180	Cang_358783	Cang_35906	Cang_382388	Cang_40083	Cang_401634	Cang_403444	Cang_411708	Cang_412006
OG0000073 Dmel_FBpp0074640	Dmel_FBpp0076853	Dmel_FBpp0078239	Dmel_FBpp0083497	Dmel_FBpp0084470	Dmel_FBpp0084685	Dmel_FBpp0084873	Dmel_FBpp0085328	Dmel_FBpp0086052	Dmel_FBpp0111701	Dmel_FBpp0111916	Dmel_FBpp0288959 Hsap_ENSP00000234371	Hsap_ENSP00000239032	Hsap_ENSP00000243673	Hsap_ENSP00000258042	Hsap_ENSP00000277942	Hsap_ENSP00000295589	Hsap_ENSP00000303325	Hsap_ENSP00000303522	Hsap_ENSP00000307445	Hsap_ENSP00000307822	Hsap_ENSP00000315011	Hsap_ENSP00000329684	Hsap_ENSP00000332591	Hsap_ENSP00000339377	Hsap_ENSP00000354652	Hsap_ENSP00000359682	Hsap_ENSP00000359899	Hsap_ENSP00000362403	Hsap_ENSP00000362810	Hsap_ENSP00000363431	Hsap_ENSP00000366416	Hsap_ENSP00000369643	Hsap_ENSP00000377948	Hsap_ENSP00000435534 Nvec_XP_001619581	Nvec_XP_001621533	Nvec_XP_001621874	Nvec_XP_001622288	Nvec_XP_001622506	Nvec_XP_001622643	Nvec_XP_001622664	Nvec_XP_001622763	Nvec_XP_001624527	Nvec_XP_001625546	Nvec_XP_001626074	Nvec_XP_001626515	Nvec_XP_001626805	Nvec_XP_001627095	Nvec_XP_001627096	Nvec_XP_001627648
OG0000074 Acas_g10333	Acas_g1167	Acas_g1987	Acas_g2947	Acas_g5554	Acas_g8088 Aque_XP_003382710	Aque_XP_003383226	Aque_XP_003384417	Aque_XP_003384728	Aque_XP_003385021	Aque_XP_003386673	Aque_XP_003387193	Aque_XP_003390338	Aque_XP_003390576 Atha_AT1G26370	Atha_AT1G27900	Atha_AT1G32490	Atha_AT2G35340	Atha_AT2G47250	Atha_AT3G26560	Atha_AT3G62310	Atha_AT4G16680	Atha_AT4G18465	Atha_AT5G13010	Atha_AT5G14900 Awhi_Unigene14654_m9229	Awhi_Unigene15592_m9743	Awhi_Unigene17256_m11044	Awhi_Unigene18101_m12069	Awhi_Unigene20591_m14197	Awhi_Unigene2648_m1910	Awhi_Unigene29812_m18301	Awhi_Unigene30072_m18543	Awhi_Unigene30073_m18545	Awhi_Unigene79_m77 Cang_101209	Cang_139642	Cang_29069	Cang_389124	Cang_53492	Cang_53860	Cang_58295	Cang_97442 Cfra_3717T1	Cfra_4513T1	Cfra_5064T1	Cfra_5291T1	Cfra_6981T1	Cfra_7349T1	Cfra_8122T1 Clim_g1181	Clim_g179	Clim_g2168	Clim_g3819	Clim_g6427 Cowc_CAOG_00903
OG0000075 Acas_g1117	Acas_g14123	Acas_g4087	Acas_g4277	Acas_g8200	Acas_g8239	Acas_g8244	Acas_g8959 Atha_AT1G01630	Atha_AT1G05370	Atha_AT1G14820	Atha_AT1G19650	Atha_AT1G22180	Atha_AT1G22530	Atha_AT1G30690	Atha_AT1G55690	Atha_AT1G55840	Atha_AT1G72150	Atha_AT1G72160	Atha_AT1G75170	Atha_AT1G75370	Atha_AT2G16380	Atha_AT2G18180	Atha_AT2G21520	Atha_AT2G21540	Atha_AT3G22410	Atha_AT3G24840	Atha_AT3G46450	Atha_AT3G51670	Atha_AT4G08690	Atha_AT4G09160	Atha_AT4G34580	Atha_AT4G36490	Atha_AT4G36640	Atha_AT4G39170	Atha_AT4G39180	Atha_AT5G47510	Atha_AT5G47730	Atha_AT5G56160	Atha_AT5G63060 Awhi_Unigene12241_m7915	Awhi_Unigene13873_m9028	Awhi_Unigene28259_m16954	Awhi_Unigene29465_m17994	Awhi_Unigene7304_m4356 Cang_106255	Cang_118626	Cang_33821	Cang_64646 Cfra_6185T1	Cfra_6837T1	Cfra_7549T1 Clim_g1536	Clim_g4341	Clim_g6461 Cowc_CAOG_00455
OG0000076 Acas_g10499	Acas_g11554	Acas_g12448	Acas_g12577	Acas_g13134	Acas_g1400	Acas_g1433	Acas_g16343	Acas_g17468	Acas_g17693	Acas_g2916	Acas_g3672	Acas_g4237	Acas_g4842	Acas_g5117	Acas_g5446	Acas_g6437	Acas_g8233	Acas_g8266 Aque_XP_003383373	Aque_XP_003385872	Aque_XP_003386039	Aque_XP_003386179	Aque_XP_003391794	Aque_XP_003392102 Atha_AT1G23740	Atha_AT3G15090	Atha_AT3G56460	Atha_AT4G13010	Atha_AT4G21580	Atha_AT5G61510 Awhi_Unigene17038_m10792	Awhi_Unigene17269_m11059	Awhi_Unigene19778_m13459	Awhi_Unigene21115_m14709	Awhi_Unigene21116_m14710	Awhi_Unigene21282_m14764	Awhi_Unigene24259_m15829	Awhi_Unigene26456_m16363	Awhi_Unigene26945_m16513	Awhi_Unigene34564_m21598	Awhi_Unigene34909_m21980	Awhi_Unigene36015_m23132	Awhi_Unigene39432_m25236	Awhi_Unigene39779_m25458	Awhi_Unigene5567_m3305	Awhi_Unigene9198_m6505	Awhi_Unigene9757_m6764 Cang_127294	Cang_234222	Cang_39109	Cang_49573 Cfra_1587T1	Cfra_1588T1	Cfra_1589T1
OG0000077 Acas_g11061	Acas_g11429	Acas_g1249	Acas_g13346	Acas_g13814	Acas_g15351	Acas_g16658	Acas_g18178	Acas_g2233	Acas_g3231	Acas_g3324	Acas_g4642	Acas_g5317	Acas_g6527	Acas_g6711	Acas_g9990 Aque_XP_003384262	Aque_XP_003385053	Aque_XP_003387237	Aque_XP_003387326	Aque_XP_003388313	Aque_XP_003388923 Atha_AT2G37290	Atha_AT2G39280	Atha_AT3G02460	Atha_AT3G07890	Atha_AT3G55020	Atha_AT5G15930 Awhi_Unigene19678_m13362	Awhi_Unigene20502_m14116	Awhi_Unigene23339_m15397	Awhi_Unigene24206_m15800	Awhi_Unigene24207_m15801	Awhi_Unigene29235_m17789	Awhi_Unigene34467_m21499	Awhi_Unigene9062_m6340	Awhi_Unigene9064_m6343 Cang_410696	Cang_60062	Cang_65574 Cfra_2005T1	Cfra_2491T1	Cfra_3296T1	Cfra_6793T1 Clim_g2124	Clim_g4540	Clim_g4876	Clim_g6659	Clim_g6740 Cowc_CAOG_00491	Cowc_CAOG_01088	Cowc_CAOG_04244	Cowc_CAOG_04593	Cowc_CAOG_06719	Cowc_CAOG_08661 Nk52_evm10s296	Nk52_evm13s252	Nk52_evm15s2531
OG0000078 Acas_g11171	Acas_g11341	Acas_g1230	Acas_g12597	Acas_g14403	Acas_g14440	Acas_g1450	Acas_g15629	Acas_g15968	Acas_g18533	Acas_g4092	Acas_g4595	Acas_g6159	Acas_g8351	Acas_g8631	Acas_g989 Aque_XP_003384537	Aque_XP_003385858 Atha_AT1G54150	Atha_AT1G59560	Atha_AT1G63900	Atha_AT2G38185	Atha_AT3G06140	Atha_AT3G09770	Atha_AT3G23280	Atha_AT3G53410	Atha_AT4G14365	Atha_AT4G24204	Atha_AT5G03200	Atha_AT5G19080 Awhi_Unigene36459_m23586	Awhi_Unigene3821_m2857 Cang_30483	Cang_58475 Cfra_0425T1	Cfra_3132T1 Clim_g1004	Clim_g2981	Clim_g6006	Clim_g703 Cowc_CAOG_01796	Cowc_CAOG_05241	Cowc_CAOG_05402	Cowc_CAOG_08893 Nk52_evm17s16	Nk52_evm25s156	Nk52_evm65s1737 Ddis_XP_636689	Ddis_XP_644829	Ddis_XP_646206	Ddis_XP_646457	Ddis_XP_647025 Dmel_FBpp0073049	Dmel_FBpp0073674	Dmel_FBpp0080921	Dmel_FBpp0086919 Ehux_100621	Ehux_100738	Ehux_102218	Ehux_103204	Ehux_104859
OG0000079 Acas_g10900	Acas_g13509	Acas_g2383	Acas_g692	Acas_g9924 Aque_XP_003383319	Aque_XP_003383567	Aque_XP_003385663	Aque_XP_003386754	Aque_XP_003388407 Atha_AT1G14750	Atha_AT1G15570	Atha_AT1G16330	Atha_AT1G20590	Atha_AT1G20610	Atha_AT1G34460	Atha_AT1G44110	Atha_AT1G47210	Atha_AT1G47220	Atha_AT1G47230	Atha_AT1G70210	Atha_AT1G76310	Atha_AT1G77390	Atha_AT1G80370	Atha_AT2G01310	Atha_AT2G17620	Atha_AT2G22490	Atha_AT2G26760	Atha_AT3G11520	Atha_AT3G50070	Atha_AT4G03270	Atha_AT4G34160	Atha_AT4G35620	Atha_AT4G37490	Atha_AT4G37630	Atha_AT5G02110	Atha_AT5G06150	Atha_AT5G10440	Atha_AT5G11300	Atha_AT5G25380	Atha_AT5G43080	Atha_AT5G65420	Atha_AT5G67260 Awhi_Unigene17042_m10797	Awhi_Unigene17859_m11778	Awhi_Unigene18491_m12506	Awhi_Unigene23482_m15456	Awhi_Unigene30069_m18541	Awhi_Unigene34207_m21243	Awhi_Unigene34208_m21244	Awhi_Unigene39881_m25520	Awhi_Unigene40489_m25896	Awhi_Unigene4769_m3122
OG0000080 Acas_g12314	Acas_g13063	Acas_g17651	Acas_g18204	Acas_g2509	Acas_g265	Acas_g4005	Acas_g5223	Acas_g5225	Acas_g5981	Acas_g6357 Aque_XP_003385055	Aque_XP_003388367	Aque_XP_003390663 Atha_AT1G11980	Atha_AT1G23410	Atha_AT1G31340	Atha_AT2G17190	Atha_AT2G17200	Atha_AT2G36170	Atha_AT2G47110	Atha_AT3G62250	Atha_AT5G11080	Atha_AT5G25270	Atha_AT5G42220 Awhi_Unigene16888_m10636	Awhi_Unigene17428_m11240	Awhi_Unigene17505_m11336	Awhi_Unigene17511_m11350	Awhi_Unigene18224_m12217	Awhi_Unigene20856_m14445	Awhi_Unigene37165_m24065	Awhi_Unigene40592_m25960	Awhi_Unigene6955_m3943	Awhi_Unigene9130_m6427	Awhi_Unigene9132_m6429 Cang_111109	Cang_111717	Cang_115447	Cang_123925	Cang_131687	Cang_33965	Cang_48873	Cang_60472 Cfra_0921T1	Cfra_1325T1	Cfra_1957T1	Cfra_3184T1	Cfra_3909T1	Cfra_4812T1	Cfra_6307T1	Cfra_7416T1 Clim_g1309	Clim_g5528	Clim_g5770	Clim_g6379 Cowc_CAOG_01293
OG0000081 Aque_XP_003382363	Aque_XP_003382364	Aque_XP_003382365	Aque_XP_003382366	Aque_XP_003382367	Aque_XP_003382368	Aque_XP_003382386	Aque_XP_003382577	Aque_XP_003382693	Aque_XP_003382850	Aque_XP_003383092	Aque_XP_003383093	Aque_XP_003383435	Aque_XP_003385179	Aque_XP_003385254	Aque_XP_003385394	Aque_XP_003387234	Aque_XP_003387258	Aque_XP_003387354	Aque_XP_003387355	Aque_XP_003387818	Aque_XP_003388591	Aque_XP_003388866	Aque_XP_003390869 Cang_57241 Dmel_FBpp0074908	Dmel_FBpp0074909	Dmel_FBpp0074934	Dmel_FBpp0290455 Ehux_104575	Ehux_107777	Ehux_122017	Ehux_195344	Ehux_206526	Ehux_210706	Ehux_213721	Ehux_214289	Ehux_216250	Ehux_217656	Ehux_219170	Ehux_222125	Ehux_225922	Ehux_226193	Ehux_231651	Ehux_233891	Ehux_235621	Ehux_236432	Ehux_236678	Ehux_238963	Ehux_244606	Ehux_245055	Ehux_248910	Ehux_249581
OG0000082 Acas_g17181	Acas_g18574	Acas_g2232	Acas_g4434	Acas_g654	Acas_g8545	Acas_g9581 Aque_XP_003382567	Aque_XP_003382568	Aque_XP_003382569	Aque_XP_003383686	Aque_XP_003384280	Aque_XP_003386238	Aque_XP_003386704	Aque_XP_003389198	Aque_XP_003389199	Aque_XP_003389200	Aque_XP_003389201	Aque_XP_003389202	Aque_XP_003391054	Aque_XP_003391274 Atha_AT1G59950	Atha_AT1G59960	Atha_AT2G21250	Atha_AT2G21260	Atha_AT2G37760	Atha_AT2G37770	Atha_AT2G37790	Atha_AT3G53880	Atha_AT5G01670	Atha_AT5G62420 Awhi_Unigene11147_m7381	Awhi_Unigene18086_m12052	Awhi_Unigene19654_m13343	Awhi_Unigene22195_m15070	Awhi_Unigene23363_m15407	Awhi_Unigene2370_m1687	Awhi_Unigene2748_m1978	Awhi_Unigene2749_m1979	Awhi_Unigene2750_m1980	Awhi_Unigene2751_m1981	Awhi_Unigene3088_m2273	Awhi_Unigene31927_m19380	Awhi_Unigene34006_m21035	Awhi_Unigene35249_m22340	Awhi_Unigene3688_m2755	Awhi_Unigene37326_m24172	Awhi_Unigene7141_m4185	Awhi_Unigene7142_m4186 Cang_106028	Cang_123896	Cang_33856 Cfra_1453T1	Cfra_4201T1	Cfra_5318T1
OG0000083 Acas_g10140	Acas_g10239	Acas_g10304	Acas_g10327	Acas_g1040	Acas_g11086	Acas_g11316	Acas_g11407	Acas_g11556	Acas_g11712	Acas_g11809	Acas_g12269	Acas_g13464	Acas_g14968	Acas_g3049	Acas_g365	Acas_g3934	Acas_g4086	Acas_g4426	Acas_g4581	Acas_g4818	Acas_g483	Acas_g4893	Acas_g5082	Acas_g5967	Acas_g6441	Acas_g6554	Acas_g6624	Acas_g6742	Acas_g7120	Acas_g9392	Acas_g9536 Aque_XP_003382905	Aque_XP_003387168	Aque_XP_003387563	Aque_XP_003388839	Aque_XP_003388947	Aque_XP_003389395	Aque_XP_003391761 Awhi_Unigene11964_m7731	Awhi_Unigene15694_m9809	Awhi_Unigene15843_m9880	Awhi_Unigene19037_m12760	Awhi_Unigene19476_m13175	Awhi_Unigene19879_m13538	Awhi_Unigene19880_m13540	Awhi_Unigene21101_m14701	Awhi_Unigene33062_m20461	Awhi_Unigene35078_m22160	Awhi_Unigene36277_m23437	Awhi_Unigene3673_m2739	Awhi_Unigene3719_m2776
OG0000084 Acas_g10187	Acas_g12783	Acas_g15054	Acas_g16456	Acas_g16958	Acas_g273	Acas_g275	Acas_g380 Aque_XP_003382376	Aque_XP_003382554	Aque_XP_003382556	Aque_XP_003383367	Aque_XP_003383377	Aque_XP_003383949	Aque_XP_003383950	Aque_XP_003384026	Aque_XP_003384461	Aque_XP_003384462	Aque_XP_003384831	Aque_XP_003385183	Aque_XP_003385447	Aque_XP_003385488	Aque_XP_003386759	Aque_XP_003386840	Aque_XP_003386917	Aque_XP_003386988	Aque_XP_003387024	Aque_XP_003387025	Aque_XP_003387045	Aque_XP_003387255	Aque_XP_003387256	Aque_XP_003387257	Aque_XP_003387263	Aque_XP_003387570	Aque_XP_003387883	Aque_XP_003388101	Aque_XP_003388573	Aque_XP_003388693	Aque_XP_003388694	Aque_XP_003388695	Aque_XP_003388701	Aque_XP_003388800	Aque_XP_003389130	Aque_XP_003389131	Aque_XP_003389133	Aque_XP_003389134	Aque_XP_003389239	Aque_XP_003389240	Aque_XP_003389241	Aque_XP_003389397	Aque_XP_003389412
OG0000085 Acas_g10999	Acas_g1390	Acas_g18284	Acas_g2458	Acas_g2663	Acas_g4726	Acas_g6387	Acas_g6766	Acas_g7601	Acas_g9370	Acas_g9371 Aque_XP_003384008	Aque_XP_003384286	Aque_XP_003385145	Aque_XP_003385544	Aque_XP_003386028	Aque_XP_003387494	Aque_XP_003388291	Aque_XP_003388339	Aque_XP_003388432	Aque_XP_003388554	Aque_XP_003389160	Aque_XP_003389188	Aque_XP_003389231	Aque_XP_003389734	Aque_XP_003389810	Aque_XP_003389812	Aque_XP_003389983	Aque_XP_003390030	Aque_XP_003390100	Aque_XP_003390533	Aque_XP_003390665	Aque_XP_003390794	Aque_XP_003391141	Aque_XP_003391234	Aque_XP_003391246	Aque_XP_003391313	Aque_XP_003391641	Aque_XP_003391654	Aque_XP_003391957 Atha_AT1G10930	Atha_AT1G27880	Atha_AT1G31360	Atha_AT1G60930	Atha_AT3G05740	Atha_AT4G35740	Atha_AT5G27680 Awhi_Unigene10588_m7141	Awhi_Unigene12141_m7848	Awhi_Unigene13667_m8884	Awhi_Unigene22046_m15014	Awhi_Unigene222_m174	Awhi_Unigene40892_m26133
OG0000086 Acas_g13029	Acas_g15241	Acas_g3474	Acas_g370	Acas_g373	Acas_g406	Acas_g9131 Aque_XP_003383217	Aque_XP_003384527	Aque_XP_003387315	Aque_XP_003389311	Aque_XP_003389312	Aque_XP_003390988 Atha_AT1G11080	Atha_AT1G15000	Atha_AT1G28110	Atha_AT1G43780	Atha_AT1G61130	Atha_AT1G73270	Atha_AT1G73280	Atha_AT1G73290	Atha_AT1G73300	Atha_AT1G73310	Atha_AT2G05850	Atha_AT2G12480	Atha_AT2G22920	Atha_AT2G22970	Atha_AT2G22980	Atha_AT2G23000	Atha_AT2G23010	Atha_AT2G24000	Atha_AT2G24010	Atha_AT2G27920	Atha_AT2G33530	Atha_AT2G35770	Atha_AT2G35780	Atha_AT3G02110	Atha_AT3G07990	Atha_AT3G10410	Atha_AT3G10450	Atha_AT3G12203	Atha_AT3G12220	Atha_AT3G12230	Atha_AT3G12240	Atha_AT3G17180	Atha_AT3G25420	Atha_AT3G45010	Atha_AT3G52000	Atha_AT3G52010	Atha_AT3G52020	Atha_AT3G56540	Atha_AT3G63470
OG0000087 Acas_g7969 Aque_XP_003383340	Aque_XP_003385003	Aque_XP_003389335	Aque_XP_003390966 Awhi_Unigene11972_m7737	Awhi_Unigene13840_m8997	Awhi_Unigene1914_m1336	Awhi_Unigene20411_m14033	Awhi_Unigene20412_m14034	Awhi_Unigene21221_m14743	Awhi_Unigene32058_m19503	Awhi_Unigene33519_m20927	Awhi_Unigene34463_m21493	Awhi_Unigene34976_m22053	Awhi_Unigene35095_m22176	Awhi_Unigene35777_m22871	Awhi_Unigene35936_m23036	Awhi_Unigene36294_m23458	Awhi_Unigene42503_m27049	Awhi_Unigene7046_m4067 Cang_113284	Cang_247049	Cang_346251	Cang_64502	Cang_75258 Cfra_0260T1	Cfra_0859T1	Cfra_0971T1	Cfra_1405T1	Cfra_2781T1	Cfra_3035T1	Cfra_3458T1	Cfra_3856T1	Cfra_4189T1	Cfra_4960T1	Cfra_5369T1	Cfra_6773T1	Cfra_7153T1	Cfra_7816T1 Clim_g1119	Clim_g1193	Clim_g1616	Clim_g3367	Clim_g385	Clim_g4195	Clim_g4474	Clim_g4725	Clim_g6002	Clim_g713 Cowc_CAOG_01303	Cowc_CAOG_01464	Cowc_CAOG_01784	Cowc_CAOG_02389	Cowc_CAOG_03375	Cowc_CAOG_03433
OG0000088 Acas_g2320	Acas_g403	Acas_g6436 Aque_XP_003383065	Aque_XP_003383206	Aque_XP_003386756	Aque_XP_003386757	Aque_XP_003387414	Aque_XP_003387957	Aque_XP_003388811	Aque_XP_003389911	Aque_XP_003390973	Aque_XP_003391176 Atha_AT1G55860	Atha_AT1G70320	Atha_AT4G12570 Awhi_Unigene17355_m11142	Awhi_Unigene19582_m13275	Awhi_Unigene28715_m17367	Awhi_Unigene33966_m20990	Awhi_Unigene3524_m2613	Awhi_Unigene35741_m22835	Awhi_Unigene36699_m23735	Awhi_Unigene42488_m27042	Awhi_Unigene8920_m6161 Cang_33940	Cang_38292 Cfra_1928T1	Cfra_3661T1	Cfra_3668T1	Cfra_3682T1	Cfra_4899T1	Cfra_6842T1 Clim_g2882	Clim_g3111	Clim_g4100	Clim_g4386	Clim_g5988	Clim_g6887 Cowc_CAOG_00322	Cowc_CAOG_01913	Cowc_CAOG_02745	Cowc_CAOG_03063	Cowc_CAOG_03498	Cowc_CAOG_04735	Cowc_CAOG_05774	Cowc_CAOG_06100	Cowc_CAOG_07866	Cowc_CAOG_08010 Nk52_evm106s485	Nk52_evm18s256	Nk52_evm23s2085	Nk52_evm45s2309	Nk52_evm47s266 Ddis_XP_002649137	Ddis_XP_638793	Ddis_XP_640503 Dmel_FBpp0071299	Dmel_FBpp0071300	Dmel_FBpp0073898
OG0000089 Acas_g10274	Acas_g12002	Acas_g12048	Acas_g12549	Acas_g1365	Acas_g1689	Acas_g575	Acas_g7416	Acas_g8309 Aque_XP_003383363	Aque_XP_003385224	Aque_XP_003386487	Aque_XP_003387036	Aque_XP_003387965	Aque_XP_003389038	Aque_XP_003389928 Atha_AT1G03000	Atha_AT2G03670	Atha_AT3G01610	Atha_AT3G09840	Atha_AT3G53230	Atha_AT3G56690	Atha_AT5G03340	Atha_AT5G08470 Awhi_Unigene14437_m9111	Awhi_Unigene14438_m9114	Awhi_Unigene16892_m10640	Awhi_Unigene24131_m15774	Awhi_Unigene26093_m16285	Awhi_Unigene2766_m1991	Awhi_Unigene28446_m17127	Awhi_Unigene29199_m17760	Awhi_Unigene39948_m25566	Awhi_Unigene700_m710 Cang_118066	Cang_126559	Cang_159887	Cang_23822	Cang_27037	Cang_329225	Cang_348850	Cang_38884	Cang_47416	Cang_54645 Cfra_0702T1	Cfra_2674T1	Cfra_3099T1	Cfra_4695T1	Cfra_7369T1	Cfra_7695T1	Cfra_8438T1 Clim_g2277	Clim_g2576	Clim_g3984	Clim_g5220	Clim_g927 Cowc_CAOG_00033
OG0000090 Acas_g10128	Acas_g10364	Acas_g10645	Acas_g1081	Acas_g11202	Acas_g11356	Acas_g11472	Acas_g11799	Acas_g12220	Acas_g12375	Acas_g13117	Acas_g13213	Acas_g15217	Acas_g16533	Acas_g2698	Acas_g2849	Acas_g3050	Acas_g3104	Acas_g3180	Acas_g3404	Acas_g356	Acas_g3793	Acas_g4124	Acas_g4278	Acas_g5795	Acas_g584	Acas_g6119	Acas_g6298	Acas_g6653	Acas_g7481	Acas_g7862	Acas_g8325	Acas_g9119	Acas_g930 Aque_XP_003382409	Aque_XP_003387903	Aque_XP_003388916	Aque_XP_003389599	Aque_XP_003390536 Awhi_Unigene16643_m10362	Awhi_Unigene19342_m13052	Awhi_Unigene19502_m13202	Awhi_Unigene19503_m13203	Awhi_Unigene19504_m13204	Awhi_Unigene20579_m14192	Awhi_Unigene20685_m14280	Awhi_Unigene28054_m16783	Awhi_Unigene28350_m17035	Awhi_Unigene28466_m17140	Awhi_Unigene28467_m17141	Awhi_Unigene29165_m17737	Awhi_Unigene29787_m18281
OG0000091 Acas_g3382	Acas_g6627	Acas_g7008 Atha_ATMG01250 Awhi_Unigene117_m108	Awhi_Unigene12254_m7923	Awhi_Unigene1_m1	Awhi_Unigene38814_m25007	Awhi_Unigene5815_m3402	Awhi_Unigene779_m778	Awhi_Unigene780_m779	Awhi_Unigene784_m782 Cfra_8635T1 Cowc_CAOG_08843	Cowc_CAOG_08881	Cowc_CAOG_08961	Cowc_CAOG_09021	Cowc_CAOG_09213	Cowc_CAOG_09247	Cowc_CAOG_09248 Nk52_evm19s296	Nk52_evm1s2366	Nk52_evm1s2392	Nk52_evm1s2452	Nk52_evm1s2618	Nk52_evm1s55	Nk52_evm1s587	Nk52_evm1s629	Nk52_evm1s680	Nk52_evm1s751	Nk52_evm1s821	Nk52_evm1s895	Nk52_evm1s955	Nk52_evm1s959	Nk52_evm20s270	Nk52_evm22s241	Nk52_evm2s1271	Nk52_evm2s2224	Nk52_evm5s1892	Nk52_evm5s289	Nk52_evm5s426	Nk52_evm6s1892	Nk52_evm6s726	Nk52_evm7s503	Nk52_evm8s503	Nk52_evm9s503 Ddis_XP_628904	Ddis_XP_629061	Ddis_XP_629064	Ddis_XP_629110	Ddis_XP_629155	Ddis_XP_629268	Ddis_XP_629360	Ddis_XP_629485	Ddis_XP_629722	Ddis_XP_629724
OG0000092 Acas_g11187	Acas_g12948	Acas_g1810	Acas_g18256	Acas_g2555	Acas_g4836	Acas_g7364	Acas_g807	Acas_g8845 Aque_XP_003383029	Aque_XP_003383996	Aque_XP_003385758	Aque_XP_003387469	Aque_XP_003387562	Aque_XP_003389334	Aque_XP_003390716	Aque_XP_003390866	Aque_XP_003390948	Aque_XP_003391615 Atha_AT1G23800	Atha_AT1G74920	Atha_AT1G79440	Atha_AT2G14170	Atha_AT2G24270	Atha_AT3G24503	Atha_AT3G48000	Atha_AT3G48170 Awhi_Unigene11278_m7434	Awhi_Unigene14095_m9053	Awhi_Unigene16798_m10544	Awhi_Unigene17647_m11512	Awhi_Unigene35248_m22339	Awhi_Unigene7328_m4384	Awhi_Unigene9150_m6449 Cang_117454	Cang_52625	Cang_53653	Cang_54073 Cfra_0151T1	Cfra_2451T1	Cfra_2903T1	Cfra_4118T1	Cfra_6871T1 Clim_g2256	Clim_g263	Clim_g435	Clim_g6508 Cowc_CAOG_00500	Cowc_CAOG_02835	Cowc_CAOG_04450	Cowc_CAOG_06511 Nk52_evm20s2578	Nk52_evm4s2367	Nk52_evm57s2391	Nk52_evm7s272	Nk52_evm82s62	Nk52_evm8s1271 Ddis_XP_635634	Ddis_XP_635635
OG0000093 Aque_XP_003382992	Aque_XP_003383375	Aque_XP_003383376	Aque_XP_003384666	Aque_XP_003384786	Aque_XP_003384787	Aque_XP_003385729	Aque_XP_003386258	Aque_XP_003386478	Aque_XP_003386585	Aque_XP_003386900	Aque_XP_003387226	Aque_XP_003387327	Aque_XP_003387328	Aque_XP_003387329	Aque_XP_003387330	Aque_XP_003387427	Aque_XP_003387428	Aque_XP_003387429	Aque_XP_003387430	Aque_XP_003387431	Aque_XP_003387432	Aque_XP_003387433	Aque_XP_003387434	Aque_XP_003387435	Aque_XP_003387551	Aque_XP_003388285	Aque_XP_003388286	Aque_XP_003388287	Aque_XP_003388288	Aque_XP_003388400	Aque_XP_003388614	Aque_XP_003388828	Aque_XP_003388829	Aque_XP_003388830	Aque_XP_003388877	Aque_XP_003389031	Aque_XP_003389032	Aque_XP_003389226	Aque_XP_003389227	Aque_XP_003389369	Aque_XP_003389439	Aque_XP_003389440	Aque_XP_003389840	Aque_XP_003389841	Aque_XP_003389857	Aque_XP_003389896	Aque_XP_003389897	Aque_XP_003389946	Aque_XP_003389966
OG0000094 Acas_g13353	Acas_g3626	Acas_g7111	Acas_g7351 Aque_XP_003389617	Aque_XP_003391101 Atha_AT1G02400	Atha_AT1G03400	Atha_AT1G03410	Atha_AT1G04350	Atha_AT1G04380	Atha_AT1G05010	Atha_AT1G06620	Atha_AT1G06640	Atha_AT1G06645	Atha_AT1G06650	Atha_AT1G12010	Atha_AT1G15550	Atha_AT1G17010	Atha_AT1G17020	Atha_AT1G30040	Atha_AT1G35190	Atha_AT1G44090	Atha_AT1G47990	Atha_AT1G49390	Atha_AT1G50960	Atha_AT1G52800	Atha_AT1G52820	Atha_AT1G55290	Atha_AT1G60980	Atha_AT1G62380	Atha_AT1G77330	Atha_AT1G78440	Atha_AT1G78550	Atha_AT1G80320	Atha_AT1G80330	Atha_AT1G80340	Atha_AT2G19590	Atha_AT2G25450	Atha_AT2G30830	Atha_AT2G30840	Atha_AT2G34555	Atha_AT2G36690	Atha_AT2G38240	Atha_AT2G44800	Atha_AT3G11180	Atha_AT3G12900	Atha_AT3G13610	Atha_AT3G19000	Atha_AT3G19010	Atha_AT3G21420	Atha_AT3G46480
OG0000095 Acas_g10174	Acas_g10366	Acas_g12616	Acas_g13189	Acas_g14266	Acas_g15698	Acas_g15935	Acas_g18402	Acas_g18628	Acas_g2316	Acas_g6184	Acas_g6964	Acas_g8178	Acas_g8289	Acas_g9233	Acas_g9665 Aque_XP_003382880	Aque_XP_003385276	Aque_XP_003386527	Aque_XP_003387323	Aque_XP_003387667	Aque_XP_003388587	Aque_XP_003390430 Atha_AT3G20810	Atha_AT3G45880	Atha_AT5G19840 Awhi_Unigene28178_m16888	Awhi_Unigene29846_m18337	Awhi_Unigene35172_m22263	Awhi_Unigene35173_m22264	Awhi_Unigene40667_m26009	Awhi_Unigene41446_m26447	Awhi_Unigene8251_m5403 Cang_133881	Cang_26290	Cang_54997 Cfra_2798T1	Cfra_3953T1	Cfra_4915T1	Cfra_5311T1	Cfra_6338T1	Cfra_8355T1 Clim_g2131	Clim_g3170	Clim_g4174	Clim_g908 Cowc_CAOG_01898	Cowc_CAOG_02325	Cowc_CAOG_02532	Cowc_CAOG_03622	Cowc_CAOG_05125	Cowc_CAOG_08762 Nk52_evm10s545	Nk52_evm12s1705	Nk52_evm1s1223	Nk52_evm2s495	Nk52_evm32s628	Nk52_evm39s1705
OG0000096 Acas_g7744 Awhi_Unigene10013_m6896	Awhi_Unigene23847_m15630	Awhi_Unigene31677_m19128	Awhi_Unigene34275_m21310	Awhi_Unigene35250_m22341	Awhi_Unigene38001_m24675	Awhi_Unigene41034_m26222	Awhi_Unigene6209_m3548 Cang_389790	Cang_67091	Cang_73522	Cang_98035 Cfra_3403T1	Cfra_6505T1	Cfra_6643T1	Cfra_7541T1 Clim_g2740	Clim_g4902 Cowc_CAOG_05253	Cowc_CAOG_07728 Nk52_evm2s367	Nk52_evm5s233	Nk52_evm82s485 Ddis_XP_642818 Dmel_FBpp0072845	Dmel_FBpp0088599	Dmel_FBpp0111503	Dmel_FBpp0111766	Dmel_FBpp0288427	Dmel_FBpp0290659 Ehux_101833	Ehux_116528	Ehux_117824	Ehux_121239	Ehux_207060	Ehux_217753	Ehux_221841	Ehux_224331	Ehux_447739	Ehux_455390	Ehux_463052	Ehux_97050	Ehux_97509 Hsap_ENSP00000155840	Hsap_ENSP00000218176	Hsap_ENSP00000221444	Hsap_ENSP00000228858	Hsap_ENSP00000252321	Hsap_ENSP00000262916	Hsap_ENSP00000265969	Hsap_ENSP00000280684	Hsap_ENSP00000287042	Hsap_ENSP00000295082	Hsap_ENSP00000297404	Hsap_ENSP00000304127	Hsap_ENSP00000305824	Hsap_ENSP00000307694	Hsap_ENSP00000312129	Hsap_ENSP00000314520
OG0000097 Acas_g10221	Acas_g11628	Acas_g12313	Acas_g1582	Acas_g1734	Acas_g3004	Acas_g6336	Acas_g6818 Aque_XP_003383372	Aque_XP_003389147 Atha_AT1G13210	Atha_AT1G17500	Atha_AT1G26130	Atha_AT1G54280	Atha_AT1G59820	Atha_AT1G68710	Atha_AT1G72700	Atha_AT3G13900	Atha_AT3G25610	Atha_AT3G27870	Atha_AT5G04930	Atha_AT5G44240 Awhi_Unigene17078_m10836	Awhi_Unigene21499_m14844	Awhi_Unigene29352_m17886	Awhi_Unigene33229_m20637	Awhi_Unigene3809_m2847 Cang_127811	Cang_312624	Cang_53493	Cang_53761	Cang_54285	Cang_62744 Cfra_1455T1	Cfra_1479T1	Cfra_2754T1	Cfra_3779T1	Cfra_6623T1 Clim_g1407	Clim_g1894	Clim_g5414	Clim_g74 Cowc_CAOG_00572	Cowc_CAOG_02655	Cowc_CAOG_04512	Cowc_CAOG_05067	Cowc_CAOG_05112 Nk52_evm11s367	Nk52_evm11s369	Nk52_evm12s168	Nk52_evm134s226	Nk52_evm16s217	Nk52_evm16s24	Nk52_evm16s2474	Nk52_evm1s212	Nk52_evm1s717	Nk52_evm23s2273 Ddis_XP_637508	Ddis_XP_639280
OG0000098 Acas_g1182	Acas_g7828 Aque_XP_003383467	Aque_XP_003383744	Aque_XP_003383843	Aque_XP_003383995	Aque_XP_003384444	Aque_XP_003385337	Aque_XP_003385473	Aque_XP_003386899	Aque_XP_003388995	Aque_XP_003389839	Aque_XP_003390067 Awhi_Unigene40265_m25756 Cang_148515	Cang_406900 Clim_g676	Clim_g766 Nk52_evm13s578	Nk52_evm19s311	Nk52_evm27s2402	Nk52_evm4s805	Nk52_evm79s208	Nk52_evm8s1762	Nk52_evm8s373	Nk52_evm9s1020 Ddis_XP_640720	Ddis_XP_647811 Dmel_FBpp0073200	Dmel_FBpp0074177	Dmel_FBpp0077190	Dmel_FBpp0078935	Dmel_FBpp0081758	Dmel_FBpp0084177	Dmel_FBpp0084550	Dmel_FBpp0289333	Dmel_FBpp0289629	Dmel_FBpp0290053 Ehux_101059	Ehux_116665	Ehux_117907	Ehux_216525	Ehux_42298	Ehux_42604	Ehux_42928	Ehux_438199	Ehux_448219	Ehux_448902	Ehux_458828	Ehux_463212	Ehux_465099	Ehux_465781	Ehux_469304	Ehux_95226 Falb_H696_00924T0	Falb_H696_04161T0 Hsap_ENSP00000233336	Hsap_ENSP00000239587	Hsap_ENSP00000258398	Hsap_ENSP00000260505
OG0000099 Acas_g11700	Acas_g12118	Acas_g12219	Acas_g12556	Acas_g1290	Acas_g14568	Acas_g15096	Acas_g1536	Acas_g15489	Acas_g15592	Acas_g16865	Acas_g17711	Acas_g1857	Acas_g1933	Acas_g1967	Acas_g202	Acas_g2237	Acas_g3279	Acas_g3284	Acas_g3341	Acas_g4585	Acas_g5422	Acas_g5524	Acas_g5898	Acas_g6200	Acas_g7294	Acas_g8352	Acas_g8407	Acas_g9023	Acas_g9240	Acas_g9384	Acas_g9966 Aque_XP_003383321	Aque_XP_003385403	Aque_XP_003387900 Atha_AT2G24240	Atha_AT2G44700	Atha_AT3G09030	Atha_AT4G19250	Atha_AT4G30940	Atha_AT5G41330	Atha_AT5G55000 Awhi_Unigene12418_m8022	Awhi_Unigene21868_m14963	Awhi_Unigene32969_m20375	Awhi_Unigene33008_m20415	Awhi_Unigene34188_m21222	Awhi_Unigene40993_m26192	Awhi_Unigene41957_m26729 Cfra_3734T1	Cfra_4272T1	Cfra_7286T1 Clim_g2286	Clim_g2287	Clim_g4727 Cowc_CAOG_00559
OG0000100 Acas_g10419	Acas_g10675	Acas_g13904	Acas_g1401	Acas_g14596	Acas_g1588	Acas_g16307	Acas_g3523	Acas_g4804	Acas_g7170	Acas_g7408	Acas_g8162	Acas_g8181 Atha_AT1G02660	Atha_AT1G05800	Atha_AT1G06250	Atha_AT1G06800	Atha_AT1G30370	Atha_AT1G45201	Atha_AT1G51440	Atha_AT1G56630	Atha_AT2G30550	Atha_AT2G31100	Atha_AT2G31690	Atha_AT2G42690	Atha_AT2G44810	Atha_AT3G14360	Atha_AT3G52430	Atha_AT4G13550	Atha_AT4G16820	Atha_AT4G18550	Atha_AT5G18630	Atha_AT5G18640	Atha_AT5G42930	Atha_AT5G67050 Awhi_Unigene16367_m10071	Awhi_Unigene16871_m10617	Awhi_Unigene17215_m10991	Awhi_Unigene17216_m10992	Awhi_Unigene21520_m14852	Awhi_Unigene22166_m15057	Awhi_Unigene28584_m17252	Awhi_Unigene33531_m20928	Awhi_Unigene35630_m22725	Awhi_Unigene36781_m23792	Awhi_Unigene3895_m2931	Awhi_Unigene3896_m2932	Awhi_Unigene6414_m3605	Awhi_Unigene6537_m3667 Cang_100889	Cang_121968	Cang_123216	Cang_123335
OG0000101 Acas_g12065	Acas_g12351	Acas_g189	Acas_g5014	Acas_g5983	Acas_g6847	Acas_g7559	Acas_g7726 Aque_XP_003383163	Aque_XP_003384467 Atha_AT1G03680	Atha_AT1G11530	Atha_AT1G19730	Atha_AT1G31020	Atha_AT1G43560	Atha_AT1G45145	Atha_AT1G50320	Atha_AT1G59730	Atha_AT1G69880	Atha_AT1G76760	Atha_AT2G15570	Atha_AT2G35010	Atha_AT2G40790	Atha_AT3G02730	Atha_AT3G04780	Atha_AT3G06730	Atha_AT3G08710	Atha_AT3G15360	Atha_AT3G51030	Atha_AT3G53220	Atha_AT3G56420	Atha_AT4G03520	Atha_AT5G16400	Atha_AT5G39950	Atha_AT5G42980 Awhi_Unigene16530_m10239	Awhi_Unigene18350_m12353	Awhi_Unigene20259_m13894	Awhi_Unigene35941_m23045	Awhi_Unigene39716_m25427 Cang_125200	Cang_127694	Cang_43263	Cang_57128	Cang_61168 Cfra_2816T1	Cfra_7224T1	Cfra_8400T1 Clim_g4392	Clim_g4748	Clim_g5615	Clim_g867 Cowc_CAOG_02287	Cowc_CAOG_02925	Cowc_CAOG_06423 Nk52_evm1s1906	Nk52_evm39s343	Nk52_evm4s689
OG0000102 Acas_g11860	Acas_g12357	Acas_g13237	Acas_g2688	Acas_g8513 Aque_XP_003386175	Aque_XP_003392044 Atha_AT1G20480	Atha_AT1G20490	Atha_AT1G20500	Atha_AT1G20510	Atha_AT1G30520	Atha_AT1G51680	Atha_AT1G62940	Atha_AT1G65060	Atha_AT3G21230	Atha_AT3G21240	Atha_AT3G48990	Atha_AT4G05160	Atha_AT4G19010	Atha_AT5G38120	Atha_AT5G63380 Awhi_Unigene20223_m13864	Awhi_Unigene2266_m1608	Awhi_Unigene34115_m21149	Awhi_Unigene3471_m2569	Awhi_Unigene36425_m23559	Awhi_Unigene904_m921 Cang_125883	Cang_128146	Cang_54389	Cang_56988	Cang_58654	Cang_65713 Cfra_0096T1	Cfra_0871T1	Cfra_0872T1	Cfra_0873T1	Cfra_1451T1	Cfra_3959T1 Clim_g3129	Clim_g3213	Clim_g3214 Cowc_CAOG_01236	Cowc_CAOG_06261 Nk52_evm25s1967	Nk52_evm4s426	Nk52_evm58s270	Nk52_evm6s374	Nk52_evm6s78	Nk52_evm7s374	Nk52_evm8s374 Ddis_XP_638379	Ddis_XP_638380	Ddis_XP_638381	Ddis_XP_641700 Dmel_FBpp0071488	Dmel_FBpp0071489	Dmel_FBpp0072262	Dmel_FBpp0073789
OG0000103 Acas_g10785	Acas_g12241	Acas_g13100	Acas_g2985	Acas_g3804	Acas_g4316	Acas_g717	Acas_g870 Aque_XP_003382587	Aque_XP_003382862	Aque_XP_003386263	Aque_XP_003386705	Aque_XP_003389009 Atha_AT1G14140	Atha_AT2G22500	Atha_AT3G54110	Atha_AT4G03115	Atha_AT4G24570	Atha_AT5G09470	Atha_AT5G19760	Atha_AT5G58970 Awhi_Unigene13075_m8469	Awhi_Unigene17637_m11503	Awhi_Unigene2960_m2142	Awhi_Unigene29701_m18207	Awhi_Unigene32125_m19575 Cang_116656	Cang_44082	Cang_44342 Cfra_0069T1	Cfra_2066T1	Cfra_3019T1	Cfra_4260T1	Cfra_4598T1	Cfra_6824T1	Cfra_7465T1 Clim_g1097	Clim_g3247	Clim_g4119	Clim_g4776 Cowc_CAOG_00186	Cowc_CAOG_01198	Cowc_CAOG_01783	Cowc_CAOG_02873	Cowc_CAOG_04976	Cowc_CAOG_05425	Cowc_CAOG_05537 Nk52_evm11s266	Nk52_evm11s273	Nk52_evm26s207	Nk52_evm27s2367	Nk52_evm32s234	Nk52_evm48s1810	Nk52_evm49s223	Nk52_evm6s805 Ddis_XP_001733006	Ddis_XP_638658	Ddis_XP_645658 Dmel_FBpp0073222	Dmel_FBpp0073223
OG0000104 Acas_g1065	Acas_g10927	Acas_g11042	Acas_g11065	Acas_g11259	Acas_g11339	Acas_g12201	Acas_g12353	Acas_g12423	Acas_g12847	Acas_g13000	Acas_g13203	Acas_g13395	Acas_g14475	Acas_g1448	Acas_g14538	Acas_g15124	Acas_g1523	Acas_g15688	Acas_g15778	Acas_g16317	Acas_g1795	Acas_g3127	Acas_g4227	Acas_g4303	Acas_g4441	Acas_g4725	Acas_g4916	Acas_g5241	Acas_g6602	Acas_g7933	Acas_g7970	Acas_g8339 Aque_XP_003384529	Aque_XP_003386724	Aque_XP_003388557 Atha_AT1G08125	Atha_AT1G63855	Atha_AT1G73320	Atha_AT2G26810	Atha_AT3G50850	Atha_AT5G44170	Atha_AT5G49560 Awhi_Unigene10480_m7094	Awhi_Unigene19494_m13191	Awhi_Unigene19495_m13193	Awhi_Unigene24654_m16023	Awhi_Unigene28142_m16858	Awhi_Unigene42233_m26888 Cang_228589	Cang_25014	Cang_324546	Cang_34917	Cang_36988
OG0000105 Acas_g11093 Aque_XP_003382436	Aque_XP_003384415	Aque_XP_003385514	Aque_XP_003386377	Aque_XP_003387796	Aque_XP_003391531 Atha_AT2G40116	Atha_AT3G08510	Atha_AT3G47220	Atha_AT3G47290	Atha_AT3G55940	Atha_AT4G38530	Atha_AT5G58670	Atha_AT5G58690	Atha_AT5G58700 Awhi_Unigene11507_m7530	Awhi_Unigene17408_m11213	Awhi_Unigene18125_m12102	Awhi_Unigene18425_m12435	Awhi_Unigene2730_m1961	Awhi_Unigene28279_m16973	Awhi_Unigene28547_m17213	Awhi_Unigene2860_m2062	Awhi_Unigene31551_m18989	Awhi_Unigene32716_m20145	Awhi_Unigene32717_m20146	Awhi_Unigene33242_m20652	Awhi_Unigene36616_m23682	Awhi_Unigene38236_m24842	Awhi_Unigene40408_m25847	Awhi_Unigene40409_m25848	Awhi_Unigene40410_m25849	Awhi_Unigene7429_m4490 Cang_58006 Cfra_0553T1	Cfra_0559T1	Cfra_2128T1	Cfra_6680T1	Cfra_6732T1 Clim_g2708	Clim_g4136	Clim_g4378 Cowc_CAOG_00059	Cowc_CAOG_00247	Cowc_CAOG_01805	Cowc_CAOG_01904	Cowc_CAOG_03107	Cowc_CAOG_03477	Cowc_CAOG_05500	Cowc_CAOG_07975	Cowc_CAOG_08700 Nk52_evm34s156	Nk52_evm38s224	Nk52_evm38s242	Nk52_evm4s2496	Nk52_evm61s217 Ddis_XP_629476 Dmel_FBpp0070618	Dmel_FBpp0074009
OG0000106 Acas_g10676	Acas_g11129	Acas_g1140	Acas_g12003	Acas_g1446	Acas_g4154	Acas_g4190	Acas_g5565	Acas_g624	Acas_g6277	Acas_g6664	Acas_g8699	Acas_g924	Acas_g9455	Acas_g9657 Aque_XP_003385079	Aque_XP_003385567	Aque_XP_003386101	Aque_XP_003387795	Aque_XP_003388281	Aque_XP_003391667 Atha_AT1G02130	Atha_AT1G43890	Atha_AT3G09900	Atha_AT3G09910	Atha_AT3G11730	Atha_AT3G46060	Atha_AT3G53610	Atha_AT4G17530	Atha_AT5G03520	Atha_AT5G03530	Atha_AT5G47200	Atha_AT5G59840 Awhi_Unigene16650_m10367	Awhi_Unigene17202_m10973	Awhi_Unigene18133_m12114	Awhi_Unigene29797_m18290	Awhi_Unigene3312_m2441	Awhi_Unigene5499_m3284	Awhi_Unigene6167_m3526	Awhi_Unigene619_m591 Cang_141390	Cang_33378	Cang_38548	Cang_46502	Cang_76911 Cfra_2918T1	Cfra_3616T1	Cfra_4062T1	Cfra_8452T1 Clim_g325	Clim_g5411	Clim_g6762	Clim_g741 Cowc_CAOG_02329	Cowc_CAOG_02661	Cowc_CAOG_04809 Nk52_evm1s2153
OG0000107 Acas_g10414	Acas_g1078	Acas_g10978	Acas_g11040	Acas_g11108	Acas_g1133	Acas_g11702	Acas_g12792	Acas_g15196	Acas_g15932	Acas_g15976	Acas_g1723	Acas_g2240	Acas_g2675	Acas_g3719	Acas_g3883	Acas_g5049	Acas_g5201	Acas_g6577	Acas_g7914	Acas_g8204	Acas_g8592	Acas_g8784	Acas_g9263	Acas_g9352 Aque_XP_003382807	Aque_XP_003383324	Aque_XP_003385732	Aque_XP_003388731	Aque_XP_003391375 Awhi_Unigene18269_m12262	Awhi_Unigene20087_m13738	Awhi_Unigene21905_m14973	Awhi_Unigene2275_m1614	Awhi_Unigene2276_m1615	Awhi_Unigene24564_m15982	Awhi_Unigene29862_m18354	Awhi_Unigene31430_m18880	Awhi_Unigene38085_m24737	Awhi_Unigene40812_m26097	Awhi_Unigene4848_m3139	Awhi_Unigene6352_m3585	Awhi_Unigene6353_m3586	Awhi_Unigene7180_m4227	Awhi_Unigene7564_m4631 Cang_110553	Cang_218676	Cang_298906	Cang_37867	Cang_44038 Cfra_0040T1	Cfra_0848T1	Cfra_1116T1	Cfra_3512T1
OG0000108 Acas_g12403	Acas_g15650	Acas_g16223	Acas_g5550	Acas_g6466	Acas_g74 Aque_XP_003382659	Aque_XP_003383938	Aque_XP_003385022	Aque_XP_003390162	Aque_XP_003391170 Atha_AT1G05470	Atha_AT1G05630	Atha_AT1G34120	Atha_AT1G47510	Atha_AT1G65580	Atha_AT1G71710	Atha_AT2G01900	Atha_AT2G31830	Atha_AT2G32010	Atha_AT2G37440	Atha_AT2G43900	Atha_AT3G63240	Atha_AT4G18010	Atha_AT5G04980	Atha_AT5G65090 Awhi_Unigene14639_m9215	Awhi_Unigene16414_m10115	Awhi_Unigene19949_m13618	Awhi_Unigene20098_m13747	Awhi_Unigene2485_m1773	Awhi_Unigene32400_m19855	Awhi_Unigene32923_m20330	Awhi_Unigene35704_m22798	Awhi_Unigene36029_m23152	Awhi_Unigene8938_m6187	Awhi_Unigene8939_m6190 Cang_26869	Cang_40507	Cang_81724 Cfra_1320T1	Cfra_2331T1	Cfra_3224T1	Cfra_3445T1	Cfra_6018T1	Cfra_7454T1 Clim_g1162	Clim_g2507	Clim_g3390	Clim_g3609	Clim_g3651 Cowc_CAOG_01063	Cowc_CAOG_01452	Cowc_CAOG_01864	Cowc_CAOG_04696	Cowc_CAOG_05074	Cowc_CAOG_05559
OG0000109 Acas_g10253	Acas_g11787	Acas_g2726	Acas_g4537	Acas_g4721	Acas_g7131	Acas_g7665	Acas_g9391	Acas_g9875 Aque_XP_003383627	Aque_XP_003384865	Aque_XP_003387162	Aque_XP_003388834	Aque_XP_003390012 Atha_AT2G13370	Atha_AT2G25170	Atha_AT2G44980	Atha_AT3G06400	Atha_AT4G31900	Atha_AT5G18620	Atha_AT5G44800	Atha_AT5G66750 Awhi_Unigene17915_m11832	Awhi_Unigene23884_m15653	Awhi_Unigene29170_m17742	Awhi_Unigene31658_m19103	Awhi_Unigene6987_m3989	Awhi_Unigene7649_m4722 Cang_27623	Cang_350898	Cang_49397	Cang_89239 Cfra_0987T1	Cfra_3465T1	Cfra_4777T1	Cfra_6977T1	Cfra_8587T1 Clim_g1378	Clim_g2897	Clim_g3319	Clim_g4630 Cowc_CAOG_02220	Cowc_CAOG_03905	Cowc_CAOG_04904	Cowc_CAOG_06134	Cowc_CAOG_06231	Cowc_CAOG_06633	Cowc_CAOG_08157 Nk52_evm13s352	Nk52_evm19s2622	Nk52_evm4s2241	Nk52_evm68s217	Nk52_evm9s2241 Ddis_XP_629261	Ddis_XP_629432	Ddis_XP_638708	Ddis_XP_641133 Dmel_FBpp0074766	Dmel_FBpp0077358	Dmel_FBpp0086954
OG0000110 Aque_XP_003384004	Aque_XP_003386686 Atha_AT1G05170	Atha_AT1G11730	Atha_AT1G22015	Atha_AT1G26810	Atha_AT1G27120	Atha_AT1G32930	Atha_AT1G33430	Atha_AT1G53290	Atha_AT1G74800	Atha_AT1G77810	Atha_AT2G25300	Atha_AT2G26100	Atha_AT2G32430	Atha_AT3G06440	Atha_AT3G14960	Atha_AT4G21060	Atha_AT4G26940	Atha_AT4G32120	Atha_AT5G53340	Atha_AT5G62620 Awhi_Unigene20493_m14110	Awhi_Unigene867_m883 Cang_129706 Clim_g3438 Cowc_CAOG_03425	Cowc_CAOG_03646	Cowc_CAOG_05924 Dmel_FBpp0070103	Dmel_FBpp0070606	Dmel_FBpp0073166	Dmel_FBpp0079197	Dmel_FBpp0079198	Dmel_FBpp0087154	Dmel_FBpp0087155	Dmel_FBpp0087156	Dmel_FBpp0087807 Ehux_100082	Ehux_105429	Ehux_112215	Ehux_118740	Ehux_196600	Ehux_203608	Ehux_243705	Ehux_259908 Hsap_ENSP00000287590	Hsap_ENSP00000303740	Hsap_ENSP00000305595	Hsap_ENSP00000312700	Hsap_ENSP00000316173	Hsap_ENSP00000319636	Hsap_ENSP00000321874	Hsap_ENSP00000323479	Hsap_ENSP00000343318	Hsap_ENSP00000355559	Hsap_ENSP00000356404	Hsap_ENSP00000368496
OG0000111 Acas_g10071	Acas_g11454	Acas_g14077	Acas_g1709	Acas_g3351	Acas_g5057	Acas_g5184	Acas_g9120 Aque_XP_003382513	Aque_XP_003382788	Aque_XP_003382789	Aque_XP_003384511	Aque_XP_003384512 Atha_AT2G26300 Awhi_Unigene16730_m10469	Awhi_Unigene17413_m11218	Awhi_Unigene18093_m12061	Awhi_Unigene19465_m13165	Awhi_Unigene20311_m13934	Awhi_Unigene21776_m14937	Awhi_Unigene28843_m17482	Awhi_Unigene29453_m17982	Awhi_Unigene29454_m17983	Awhi_Unigene41819_m26653	Awhi_Unigene7456_m4530	Awhi_Unigene7634_m4707	Awhi_Unigene7731_m4817	Awhi_Unigene7865_m4972	Awhi_Unigene8285_m5446	Awhi_Unigene8447_m5635 Cang_118935	Cang_121680	Cang_124945	Cang_127204	Cang_128029	Cang_400238	Cang_87018 Cfra_0785T1	Cfra_0893T1	Cfra_3440T1	Cfra_5889T1	Cfra_5945T1	Cfra_6687T1 Clim_g2164	Clim_g4845 Cowc_CAOG_00167	Cowc_CAOG_01139	Cowc_CAOG_03262	Cowc_CAOG_03395	Cowc_CAOG_04667	Cowc_CAOG_05446 Nk52_evm15s246	Nk52_evm40s1810	Nk52_evm88s270 Ddis_XP_637414	Ddis_XP_637799	Ddis_XP_638196	Ddis_XP_638555	Ddis_XP_639050
OG0000112 Acas_g11464	Acas_g17209	Acas_g2390	Acas_g3167	Acas_g4650	Acas_g7932	Acas_g8928 Aque_XP_003384554	Aque_XP_003388441 Atha_AT1G80510	Atha_AT2G40420	Atha_AT3G30390	Atha_AT3G56200	Atha_AT5G38820 Awhi_Unigene16478_m10184	Awhi_Unigene31370_m18821	Awhi_Unigene32288_m19743 Cang_123286	Cang_247004	Cang_39358	Cang_47934 Cfra_0825T1	Cfra_0944T1	Cfra_2366T1	Cfra_2368T1	Cfra_2868T1	Cfra_3332T1	Cfra_3725T1	Cfra_5102T1	Cfra_5227T1	Cfra_5908T1	Cfra_6662T1 Clim_g309	Clim_g3446	Clim_g4678	Clim_g4728	Clim_g5471 Cowc_CAOG_01169	Cowc_CAOG_01365	Cowc_CAOG_02070	Cowc_CAOG_02979	Cowc_CAOG_07515	Cowc_CAOG_07901	Cowc_CAOG_07937 Nk52_evm107s224	Nk52_evm10s179	Nk52_evm1s1489	Nk52_evm23s2402	Nk52_evm30s1129	Nk52_evm44s1401	Nk52_evm51s153	Nk52_evm8s179	Nk52_evm9s179 Dmel_FBpp0071539	Dmel_FBpp0087743 Ehux_103000	Ehux_107152	Ehux_108831	Ehux_114718	Ehux_115541
OG0000113 Acas_g1017	Acas_g10272	Acas_g10273	Acas_g14081	Acas_g15391	Acas_g15678	Acas_g15724	Acas_g5283	Acas_g5733	Acas_g7141 Aque_XP_003383299	Aque_XP_003386159	Aque_XP_003391562	Aque_XP_003391793 Atha_AT4G33090 Awhi_Unigene18276_m12271	Awhi_Unigene31930_m19383	Awhi_Unigene4559_m3078	Awhi_Unigene456_m458	Awhi_Unigene456_m459 Cang_117601	Cang_119150	Cang_142810	Cang_31558 Cfra_5278T1 Clim_g2070 Cowc_CAOG_01850	Cowc_CAOG_04153	Cowc_CAOG_04730	Cowc_CAOG_06973 Nk52_evm11s316	Nk52_evm27s217	Nk52_evm58s221	Nk52_evm8s89	Nk52_evm93s485 Ddis_XP_644651	Ddis_XP_646343	Ddis_XP_646344	Ddis_XP_646397 Dmel_FBpp0071421	Dmel_FBpp0071435	Dmel_FBpp0072583	Dmel_FBpp0075867	Dmel_FBpp0080370	Dmel_FBpp0082209	Dmel_FBpp0082211	Dmel_FBpp0083523	Dmel_FBpp0083524	Dmel_FBpp0083525	Dmel_FBpp0083526	Dmel_FBpp0084751	Dmel_FBpp0084767	Dmel_FBpp0084770	Dmel_FBpp0084772	Dmel_FBpp0110098	Dmel_FBpp0110455	Dmel_FBpp0111795	Dmel_FBpp0112319	Dmel_FBpp0271735	Dmel_FBpp0288476
OG0000114 Acas_g354	Acas_g8122 Aque_XP_003382814	Aque_XP_003383605	Aque_XP_003384649	Aque_XP_003385110	Aque_XP_003387441	Aque_XP_003389029	Aque_XP_003389924	Aque_XP_003391187 Atha_AT1G54510	Atha_AT3G04810	Atha_AT3G12200	Atha_AT3G20860	Atha_AT3G44200	Atha_AT3G63280	Atha_AT5G28290 Cang_116363	Cang_135703	Cang_29227	Cang_49461 Cfra_6988T1	Cfra_8183T1 Clim_g1559	Clim_g2153	Clim_g4134	Clim_g473	Clim_g5509 Cowc_CAOG_00759	Cowc_CAOG_02107 Nk52_evm12s232	Nk52_evm15s358	Nk52_evm1s412	Nk52_evm22s248	Nk52_evm26s151	Nk52_evm2s268	Nk52_evm32s232	Nk52_evm7s232 Ddis_XP_636316	Ddis_XP_638809	Ddis_XP_642589	Ddis_XP_643733	Ddis_XP_646793 Dmel_FBpp0070225	Dmel_FBpp0071094	Dmel_FBpp0084112 Ehux_212562	Ehux_221956	Ehux_42534	Ehux_428294	Ehux_44037	Ehux_44365	Ehux_447395	Ehux_452649	Ehux_458856	Ehux_459269	Ehux_460010	Ehux_63487	Ehux_63623	Ehux_69566
OG0000115 Acas_g10328	Acas_g10344	Acas_g11087	Acas_g11147	Acas_g11695	Acas_g12389	Acas_g13845	Acas_g13846	Acas_g14929	Acas_g15454	Acas_g3510	Acas_g5072	Acas_g590	Acas_g812	Acas_g8357	Acas_g8659 Aque_XP_003382431	Aque_XP_003386483 Atha_AT1G79900	Atha_AT2G33820	Atha_AT5G46800 Awhi_Unigene14883_m9361	Awhi_Unigene17599_m11459	Awhi_Unigene24263_m15831	Awhi_Unigene31747_m19197	Awhi_Unigene36062_m23192	Awhi_Unigene42032_m26776 Cang_118664	Cang_129015	Cang_139233	Cang_156949	Cang_388472	Cang_42690	Cang_45108	Cang_45222 Cfra_4716T1	Cfra_5243T1	Cfra_5497T1	Cfra_6862T1	Cfra_7139T1 Clim_g1996	Clim_g3057	Clim_g4095	Clim_g4157	Clim_g416	Clim_g5090	Clim_g6074	Clim_g6315 Cowc_CAOG_01084	Cowc_CAOG_01328	Cowc_CAOG_02881	Cowc_CAOG_03357	Cowc_CAOG_03609	Cowc_CAOG_04321	Cowc_CAOG_07504	Cowc_CAOG_07519	Cowc_CAOG_08037 Nk52_evm19s287
OG0000116 Acas_g2978	Acas_g3772	Acas_g3916	Acas_g9921 Aque_XP_003385959	Aque_XP_003386940	Aque_XP_003388813 Atha_AT1G09080	Atha_AT1G16030	Atha_AT1G56410	Atha_AT3G09440	Atha_AT3G12580	Atha_AT5G02490	Atha_AT5G02500	Atha_AT5G28540	Atha_AT5G42020 Awhi_Unigene17661_m11538	Awhi_Unigene17677_m11562	Awhi_Unigene18318_m12314	Awhi_Unigene18319_m12316	Awhi_Unigene36501_m23612	Awhi_Unigene41380_m26415	Awhi_Unigene8260_m5420 Cang_135614	Cang_35800	Cang_41033 Cfra_1150T1	Cfra_1155T1	Cfra_2004T1	Cfra_3267T1	Cfra_4423T1	Cfra_4426T1	Cfra_5615T1	Cfra_8033T1	Cfra_8036T1 Clim_g1298	Clim_g2522 Cowc_CAOG_00845	Cowc_CAOG_01380	Cowc_CAOG_04171	Cowc_CAOG_04192	Cowc_CAOG_04537 Nk52_evm106s221	Nk52_evm28s2273	Nk52_evm67s270	Nk52_evm8s298 Ddis_XP_629089	Ddis_XP_629091	Ddis_XP_638227	Ddis_XP_643155	Ddis_XP_644428	Ddis_XP_646617 Dmel_FBpp0073445	Dmel_FBpp0075504	Dmel_FBpp0081956	Dmel_FBpp0082105	Dmel_FBpp0082106	Dmel_FBpp0082147	Dmel_FBpp0082175	Dmel_FBpp0082514
OG0000117 Aque_XP_003382521	Aque_XP_003382522	Aque_XP_003385520	Aque_XP_003387501	Aque_XP_003387502	Aque_XP_003387503	Aque_XP_003387504	Aque_XP_003388341	Aque_XP_003388645 Cang_149792	Cang_245283	Cang_25540 Clim_g1663 Cowc_CAOG_04812	Cowc_CAOG_06139	Cowc_CAOG_08369 Nk52_evm2s280 Dmel_FBpp0070429	Dmel_FBpp0070853	Dmel_FBpp0072039	Dmel_FBpp0074920	Dmel_FBpp0076233	Dmel_FBpp0079355	Dmel_FBpp0079356	Dmel_FBpp0081765	Dmel_FBpp0084286	Dmel_FBpp0085503	Dmel_FBpp0085508	Dmel_FBpp0085511	Dmel_FBpp0085512	Dmel_FBpp0085513	Dmel_FBpp0087248	Dmel_FBpp0088094	Dmel_FBpp0088097	Dmel_FBpp0088102	Dmel_FBpp0088103	Dmel_FBpp0088104	Dmel_FBpp0088105	Dmel_FBpp0088106	Dmel_FBpp0088107	Dmel_FBpp0088129	Dmel_FBpp0088131	Dmel_FBpp0111937	Dmel_FBpp0271912 Falb_H696_01689T0	Falb_H696_02637T0	Falb_H696_02781T0 Hsap_ENSP00000009180	Hsap_ENSP00000222747	Hsap_ENSP00000227155	Hsap_ENSP00000247829	Hsap_ENSP00000257857	Hsap_ENSP00000261177	Hsap_ENSP00000264234	Hsap_ENSP00000267970	Hsap_ENSP00000271324	Hsap_ENSP00000289407
OG0000118 Acas_g3619	Acas_g5677 Aque_XP_003382576	Aque_XP_003384967	Aque_XP_003386271	Aque_XP_003386746 Atha_AT5G06140	Atha_AT5G07120	Atha_AT5G37050	Atha_AT5G58440 Awhi_Unigene1031_m994	Awhi_Unigene1186_m1166	Awhi_Unigene34033_m21059	Awhi_Unigene34034_m21060	Awhi_Unigene34762_m21820	Awhi_Unigene34870_m21925	Awhi_Unigene36207_m23367	Awhi_Unigene36208_m23369	Awhi_Unigene36209_m23371	Awhi_Unigene36210_m23374	Awhi_Unigene36211_m23375	Awhi_Unigene6849_m3821	Awhi_Unigene7788_m4880 Cang_125767	Cang_43134	Cang_70215	Cang_92818 Cfra_1868T1	Cfra_4955T1	Cfra_6734T1	Cfra_6774T1	Cfra_6890T1 Clim_g4547	Clim_g5444	Clim_g6566	Clim_g677 Cowc_CAOG_01768	Cowc_CAOG_03761	Cowc_CAOG_04878	Cowc_CAOG_05018	Cowc_CAOG_06173	Cowc_CAOG_07043	Cowc_CAOG_08170 Nk52_evm14s267	Nk52_evm17s229	Nk52_evm23s136	Nk52_evm48s2367	Nk52_evm85s217	Nk52_evm8s2622 Ddis_XP_643166	Ddis_XP_644915 Dmel_FBpp0076142	Dmel_FBpp0077206	Dmel_FBpp0082110 Ehux_105464	Ehux_431836	Ehux_433295	Ehux_455678	Ehux_471479 Falb_H696_01269T0	Falb_H696_01269T1	Falb_H696_01722T0
OG0000119 Acas_g1562	Acas_g4823	Acas_g9686 Aque_XP_003385244	Aque_XP_003385611 Atha_AT1G11910	Atha_AT1G62290	Atha_AT1G69100	Atha_AT4G04460	Atha_AT4G22050 Awhi_Unigene11849_m7681	Awhi_Unigene16832_m10587	Awhi_Unigene16981_m10725	Awhi_Unigene18344_m12349	Awhi_Unigene21939_m14983	Awhi_Unigene24840_m16096	Awhi_Unigene32899_m20309	Awhi_Unigene34187_m21221	Awhi_Unigene34372_m21407	Awhi_Unigene37679_m24428	Awhi_Unigene40126_m25663	Awhi_Unigene8171_m5325 Cang_153296 Cfra_1348T1	Cfra_4597T1 Clim_g3237 Cowc_CAOG_00531	Cowc_CAOG_01171	Cowc_CAOG_07452	Cowc_CAOG_08957 Nk52_evm1s199	Nk52_evm1s40	Nk52_evm27s554	Nk52_evm2s239	Nk52_evm2s374	Nk52_evm82s554	Nk52_evm9s106 Ddis_XP_641634	Ddis_XP_641645	Ddis_XP_642564 Dmel_FBpp0070095	Dmel_FBpp0077594	Dmel_FBpp0077595	Dmel_FBpp0077596	Dmel_FBpp0077597	Dmel_FBpp0079309	Dmel_FBpp0079728	Dmel_FBpp0079729	Dmel_FBpp0082878	Dmel_FBpp0082879	Dmel_FBpp0082880	Dmel_FBpp0086615	Dmel_FBpp0087972 Ehux_197905	Ehux_358471	Ehux_362303 Hsap_ENSP00000236671	Hsap_ENSP00000253719	Hsap_ENSP00000272190	Hsap_ENSP00000309542	Hsap_ENSP00000322192	Hsap_ENSP00000354337
OG0000120 Acas_g10007	Acas_g11382	Acas_g12627	Acas_g14625	Acas_g15512	Acas_g16712	Acas_g2081	Acas_g2085	Acas_g2317	Acas_g3198	Acas_g3225	Acas_g3226	Acas_g3244	Acas_g3986	Acas_g4158	Acas_g4771	Acas_g6536	Acas_g6546	Acas_g6673	Acas_g7989	Acas_g8083	Acas_g9540	Acas_g9825 Aque_XP_003385347	Aque_XP_003386482	Aque_XP_003387655	Aque_XP_003387982	Aque_XP_003388245	Aque_XP_003388616	Aque_XP_003391027	Aque_XP_003391470 Awhi_Unigene11071_m7348	Awhi_Unigene17337_m11122	Awhi_Unigene25222_m16161	Awhi_Unigene25349_m16190	Awhi_Unigene26536_m16390	Awhi_Unigene31799_m19249	Awhi_Unigene34217_m21257	Awhi_Unigene34218_m21258	Awhi_Unigene37091_m24006	Awhi_Unigene42452_m27020	Awhi_Unigene7772_m4862 Cang_69110 Cfra_2532T1	Cfra_6476T1 Clim_g1244	Clim_g3104 Cowc_CAOG_02551	Cowc_CAOG_02554	Cowc_CAOG_03021	Cowc_CAOG_06905 Nk52_evm8s128 Ddis_XP_001134579	Ddis_XP_636175	Ddis_XP_637275	Ddis_XP_641053	Ddis_XP_641860	Ddis_XP_642870
OG0000121 Acas_g1364	Acas_g14384	Acas_g625	Acas_g8314 Aque_XP_003382622	Aque_XP_003384132	Aque_XP_003387629	Aque_XP_003390087 Atha_AT1G02840	Atha_AT1G09140	Atha_AT1G23860	Atha_AT1G60650	Atha_AT2G24590	Atha_AT2G37340	Atha_AT2G46610	Atha_AT3G49430	Atha_AT3G53500	Atha_AT3G61860	Atha_AT4G02430	Atha_AT4G25500	Atha_AT4G31580	Atha_AT5G05720	Atha_AT5G52040 Awhi_Unigene16855_m10609	Awhi_Unigene16902_m10653	Awhi_Unigene18287_m12282	Awhi_Unigene34338_m21370	Awhi_Unigene36103_m23246	Awhi_Unigene36104_m23251	Awhi_Unigene36106_m23260	Awhi_Unigene7299_m4350	Awhi_Unigene7606_m4676 Cang_44107	Cang_44889	Cang_56846	Cang_76643 Cfra_0414T1	Cfra_1198T1	Cfra_4825T1	Cfra_7822T1 Clim_g3673 Cowc_CAOG_03309	Cowc_CAOG_04274 Nk52_evm15s2635 Ddis_XP_001134500	Ddis_XP_001134599	Ddis_XP_628876	Ddis_XP_638672	Ddis_XP_641373 Dmel_FBpp0073621	Dmel_FBpp0076552	Dmel_FBpp0078996	Dmel_FBpp0079668	Dmel_FBpp0081754	Dmel_FBpp0082269	Dmel_FBpp0082724 Ehux_248948	Ehux_257430	Ehux_362686	Ehux_440007	Ehux_449013 Falb_H696_01630T0 Hsap_ENSP00000229390
OG0000122 Acas_g1071	Acas_g11577	Acas_g1161	Acas_g1516	Acas_g15906	Acas_g4253	Acas_g5560	Acas_g7387	Acas_g7388	Acas_g7404	Acas_g8146	Acas_g9789 Aque_XP_003382988	Aque_XP_003383304	Aque_XP_003385002	Aque_XP_003388116 Atha_AT1G05880	Atha_AT1G05890	Atha_AT1G65430	Atha_AT2G16090	Atha_AT2G31510	Atha_AT2G31760	Atha_AT2G31770	Atha_AT2G31780	Atha_AT3G27710	Atha_AT3G27720	Atha_AT4G34370	Atha_AT5G08730	Atha_AT5G63730	Atha_AT5G63750	Atha_AT5G63760 Awhi_Unigene14667_m9237	Awhi_Unigene16578_m10282	Awhi_Unigene28230_m16925	Awhi_Unigene28759_m17411	Awhi_Unigene29174_m17744	Awhi_Unigene29175_m17745	Awhi_Unigene293_m268	Awhi_Unigene34063_m21098	Awhi_Unigene34184_m21217	Awhi_Unigene35028_m22113	Awhi_Unigene37197_m24086	Awhi_Unigene37198_m24087	Awhi_Unigene41961_m26732	Awhi_Unigene659_m646	Awhi_Unigene7403_m4459	Awhi_Unigene7404_m4461	Awhi_Unigene8230_m5379	Awhi_Unigene8457_m5647 Cang_47457 Cfra_2290T1 Clim_g1107	Clim_g2772	Clim_g4423	Clim_g5328 Cowc_CAOG_01050	Cowc_CAOG_04614
OG0000123 Acas_g10914	Acas_g14549	Acas_g2523 Atha_AT1G03510	Atha_AT1G03540	Atha_AT1G05750	Atha_AT1G06140	Atha_AT1G06150	Atha_AT1G08070	Atha_AT1G09220	Atha_AT1G11290	Atha_AT1G14470	Atha_AT1G15510	Atha_AT1G16480	Atha_AT1G17630	Atha_AT1G18485	Atha_AT1G20230	Atha_AT1G25360	Atha_AT1G31430	Atha_AT1G31920	Atha_AT1G34160	Atha_AT1G43980	Atha_AT1G50270	Atha_AT1G56570	Atha_AT1G56690	Atha_AT1G59720	Atha_AT1G68930	Atha_AT1G69290	Atha_AT1G69350	Atha_AT1G71420	Atha_AT1G71460	Atha_AT1G71490	Atha_AT1G74400	Atha_AT1G74600	Atha_AT1G74630	Atha_AT1G77170	Atha_AT2G01510	Atha_AT2G02750	Atha_AT2G02980	Atha_AT2G03380	Atha_AT2G03880	Atha_AT2G04860	Atha_AT2G20540	Atha_AT2G21090	Atha_AT2G22070	Atha_AT2G22410	Atha_AT2G27610	Atha_AT2G27800	Atha_AT2G29760	Atha_AT2G33680	Atha_AT2G34400
OG0000124 Acas_g10512	Acas_g10670	Acas_g14960	Acas_g16784	Acas_g5863	Acas_g6630	Acas_g6772	Acas_g7119	Acas_g7247	Acas_g7463	Acas_g8177	Acas_g9032	Acas_g9413 Aque_XP_003382410	Aque_XP_003383812	Aque_XP_003388654	Aque_XP_003388952 Atha_AT1G49040	Atha_AT2G20320	Atha_AT5G35560 Awhi_Unigene10782_m7223	Awhi_Unigene13087_m8475	Awhi_Unigene13127_m8508	Awhi_Unigene15578_m9734	Awhi_Unigene18037_m11993	Awhi_Unigene28707_m17361	Awhi_Unigene33116_m20515	Awhi_Unigene35715_m22806	Awhi_Unigene3674_m2741	Awhi_Unigene37850_m24561	Awhi_Unigene40237_m25736	Awhi_Unigene40907_m26144	Awhi_Unigene73_m71	Awhi_Unigene8872_m6106 Cang_120813 Cfra_0652T1	Cfra_0978T1	Cfra_4634T1 Clim_g2697	Clim_g329	Clim_g4085	Clim_g5875	Clim_g6027	Clim_g6973 Cowc_CAOG_00406	Cowc_CAOG_00564	Cowc_CAOG_02394	Cowc_CAOG_02450	Cowc_CAOG_02770	Cowc_CAOG_03814	Cowc_CAOG_08486	Cowc_CAOG_08664 Nk52_evm10s270	Nk52_evm13s2325	Nk52_evm35s292	Nk52_evm3s16	Nk52_evm5s1810	Nk52_evm6s1224 Ddis_XP_629905
OG0000125 Acas_g10200	Acas_g10778	Acas_g13363	Acas_g15121	Acas_g1524	Acas_g15627	Acas_g16102	Acas_g4131	Acas_g427	Acas_g4457	Acas_g5416	Acas_g5901	Acas_g5944	Acas_g9158 Aque_XP_003384998	Aque_XP_003386741	Aque_XP_003386742	Aque_XP_003386761	Aque_XP_003386762	Aque_XP_003386763	Aque_XP_003386764	Aque_XP_003386765	Aque_XP_003386766	Aque_XP_003387337 Awhi_Unigene19931_m13606	Awhi_Unigene35132_m22212	Awhi_Unigene35558_m22657	Awhi_Unigene38687_m24976	Awhi_Unigene5263_m3241	Awhi_Unigene7103_m4143 Cang_121365	Cang_32736	Cang_42608	Cang_42619	Cang_44040 Cfra_0054T1	Cfra_0930T1	Cfra_5591T1	Cfra_6381T1	Cfra_6556T1	Cfra_6571T1	Cfra_8589T1 Cowc_CAOG_02067	Cowc_CAOG_07511 Ddis_XP_639027	Ddis_XP_641371	Ddis_XP_644019	Ddis_XP_644399	Ddis_XP_644578	Ddis_XP_647580 Dmel_FBpp0086156 Ehux_105459	Ehux_108082	Ehux_108521	Ehux_111521	Ehux_117429	Ehux_203363	Ehux_228062
OG0000126 Acas_g12691	Acas_g13326	Acas_g1628	Acas_g2130	Acas_g3115	Acas_g6314	Acas_g6460 Aque_XP_003383186	Aque_XP_003384071	Aque_XP_003385969	Aque_XP_003389257	Aque_XP_003390027	Aque_XP_003391090 Atha_AT1G02980	Atha_AT1G26830	Atha_AT1G43140	Atha_AT1G59790	Atha_AT1G59800	Atha_AT1G69670	Atha_AT4G02570	Atha_AT4G12100	Atha_AT5G46210 Awhi_Unigene19085_m12799	Awhi_Unigene20517_m14132	Awhi_Unigene20518_m14133	Awhi_Unigene30080_m18550	Awhi_Unigene33131_m20535	Awhi_Unigene36139_m23295 Cang_126608	Cang_56427	Cang_57363	Cang_59736	Cang_67845 Cfra_1537T1	Cfra_2409T1	Cfra_5367T1	Cfra_7481T1 Clim_g1093	Clim_g165	Clim_g2566	Clim_g2852 Cowc_CAOG_00038	Cowc_CAOG_01275	Cowc_CAOG_04201	Cowc_CAOG_04624 Nk52_evm10s470	Nk52_evm1s353	Nk52_evm5s292	Nk52_evm8s1073 Ddis_XP_629469	Ddis_XP_629756	Ddis_XP_639922	Ddis_XP_641893	Ddis_XP_647212 Dmel_FBpp0075633	Dmel_FBpp0084786	Dmel_FBpp0085254	Dmel_FBpp0087897	Dmel_FBpp0087921	Dmel_FBpp0291369 Ehux_211963
OG0000127 Acas_g11444	Acas_g11812	Acas_g12904	Acas_g13521	Acas_g1384	Acas_g14090	Acas_g14109	Acas_g15373	Acas_g16220	Acas_g16838	Acas_g17223	Acas_g17416	Acas_g2070	Acas_g2990	Acas_g4123	Acas_g5356	Acas_g5462	Acas_g8698	Acas_g9566	Acas_g9878 Aque_XP_003385433	Aque_XP_003388908	Aque_XP_003388909	Aque_XP_003388924	Aque_XP_003388925	Aque_XP_003389606	Aque_XP_003389637 Atha_AT2G29890	Atha_AT2G41740	Atha_AT3G57410	Atha_AT4G30160	Atha_AT5G57320 Awhi_Unigene1078_m1067	Awhi_Unigene18540_m12558	Awhi_Unigene34661_m21705	Awhi_Unigene35003_m22083	Awhi_Unigene35719_m22810	Awhi_Unigene35720_m22811	Awhi_Unigene8273_m5432	Awhi_Unigene8528_m5712	Awhi_Unigene8529_m5715 Cang_288171	Cang_52452	Cang_59083	Cang_74179	Cang_84864 Cfra_1028T1	Cfra_1082T1	Cfra_5628T1 Clim_g1166	Clim_g3601	Clim_g4476 Cowc_CAOG_00605	Cowc_CAOG_03808	Cowc_CAOG_03915	Cowc_CAOG_05747	Cowc_CAOG_06847 Nk52_evm53s359
OG0000128 Acas_g11306	Acas_g11782	Acas_g2212	Acas_g2756	Acas_g4037	Acas_g4318	Acas_g4936	Acas_g7538	Acas_g7722	Acas_g7878	Acas_g8002	Acas_g9677	Acas_g9840 Atha_AT1G26760	Atha_AT1G33400	Atha_AT1G43245	Atha_AT2G17900	Atha_AT2G19640	Atha_AT3G21820	Atha_AT5G06620 Awhi_Unigene10048_m6911	Awhi_Unigene12392_m8004	Awhi_Unigene12898_m8344	Awhi_Unigene15720_m9824	Awhi_Unigene18228_m12221	Awhi_Unigene20049_m13706	Awhi_Unigene2155_m1520	Awhi_Unigene26640_m16420	Awhi_Unigene3154_m2322	Awhi_Unigene36880_m23868	Awhi_Unigene39551_m25321 Cang_345912	Cang_44709	Cang_50545	Cang_73015 Cfra_1127T1	Cfra_1710T1	Cfra_1743T1	Cfra_1843T1	Cfra_2216T1	Cfra_3630T1	Cfra_5926T1	Cfra_6425T1 Clim_g3916	Clim_g4632 Cowc_CAOG_00050	Cowc_CAOG_01403	Cowc_CAOG_03053	Cowc_CAOG_03801	Cowc_CAOG_03954	Cowc_CAOG_07464	Cowc_CAOG_08663 Nk52_evm18s288	Nk52_evm23s273	Nk52_evm25s160	Nk52_evm34s229	Nk52_evm41s1073
OG0000129 Acas_g10070	Acas_g11739	Acas_g14078	Acas_g18200	Acas_g2900	Acas_g4193	Acas_g5270	Acas_g5752	Acas_g7394	Acas_g8910 Aque_XP_003382450	Aque_XP_003382921	Aque_XP_003383754	Aque_XP_003385922	Aque_XP_003388459 Atha_AT1G14560	Atha_AT1G78180	Atha_AT2G37890	Atha_AT3G20240	Atha_AT3G21390	Atha_AT3G51870	Atha_AT3G53940	Atha_AT3G55640	Atha_AT4G01100	Atha_AT4G26180	Atha_AT4G32400	Atha_AT5G01500	Atha_AT5G07320	Atha_AT5G48970	Atha_AT5G51050	Atha_AT5G61810	Atha_AT5G64970 Awhi_Unigene13011_m8425	Awhi_Unigene13712_m8915	Awhi_Unigene19016_m12738	Awhi_Unigene29239_m17793	Awhi_Unigene31358_m18806	Awhi_Unigene31359_m18807	Awhi_Unigene34143_m21173	Awhi_Unigene34144_m21174 Cang_111393	Cang_122255	Cang_42175 Cfra_0291T1	Cfra_1016T1	Cfra_4217T1	Cfra_4970T1	Cfra_6218T1	Cfra_7420T1 Clim_g1859	Clim_g3000	Clim_g4305	Clim_g4339	Clim_g4906	Clim_g6174 Cowc_CAOG_00524	Cowc_CAOG_01210
OG0000130 Acas_g7234 Awhi_Unigene40147_m25675 Nk52_evm1s2090 Dmel_FBpp0071550	Dmel_FBpp0071551	Dmel_FBpp0071845	Dmel_FBpp0074804	Dmel_FBpp0077221	Dmel_FBpp0078872	Dmel_FBpp0080466	Dmel_FBpp0080467	Dmel_FBpp0080468	Dmel_FBpp0080618	Dmel_FBpp0080654	Dmel_FBpp0080655	Dmel_FBpp0080904	Dmel_FBpp0081813	Dmel_FBpp0081814	Dmel_FBpp0081816	Dmel_FBpp0081849	Dmel_FBpp0081850	Dmel_FBpp0081851	Dmel_FBpp0081852	Dmel_FBpp0081853	Dmel_FBpp0081854	Dmel_FBpp0082126	Dmel_FBpp0083810	Dmel_FBpp0083811	Dmel_FBpp0083812	Dmel_FBpp0085174	Dmel_FBpp0085404	Dmel_FBpp0086224	Dmel_FBpp0112172	Dmel_FBpp0288390	Dmel_FBpp0290042	Dmel_FBpp0291574 Ehux_106145	Ehux_115931	Ehux_193935	Ehux_205491	Ehux_209124	Ehux_209224	Ehux_215032	Ehux_224168	Ehux_226129	Ehux_227339	Ehux_233893	Ehux_249012	Ehux_252162	Ehux_439593	Ehux_98252 Hsap_ENSP00000251566	Hsap_ENSP00000265403	Hsap_ENSP00000274278	Hsap_ENSP00000282507
OG0000131 Acas_g12323	Acas_g14343	Acas_g6912 Aque_XP_003385727	Aque_XP_003389500	Aque_XP_003390758	Aque_XP_003390759	Aque_XP_003391236	Aque_XP_003392130 Atha_AT1G70610	Atha_AT4G25450	Atha_AT5G39040 Awhi_Unigene12280_m7938	Awhi_Unigene12281_m7939	Awhi_Unigene13414_m8706	Awhi_Unigene18215_m12205	Awhi_Unigene20295_m13920	Awhi_Unigene20313_m13936	Awhi_Unigene20985_m14564	Awhi_Unigene26445_m16356	Awhi_Unigene28329_m17013	Awhi_Unigene34452_m21484	Awhi_Unigene35346_m22435	Awhi_Unigene35612_m22707	Awhi_Unigene38220_m24831	Awhi_Unigene39262_m25142	Awhi_Unigene39337_m25185	Awhi_Unigene39513_m25297 Cang_59264	Cang_84170 Cfra_6447T1	Cfra_6752T1	Cfra_7566T1	Cfra_7834T1 Clim_g1277	Clim_g1531	Clim_g3784 Cowc_CAOG_00237	Cowc_CAOG_03032	Cowc_CAOG_07437 Nk52_evm24s158	Nk52_evm98s1810 Ddis_XP_629144	Ddis_XP_641426 Dmel_FBpp0070078	Dmel_FBpp0073491 Ehux_210862	Ehux_212133	Ehux_247268	Ehux_360608	Ehux_431222	Ehux_43647	Ehux_442411	Ehux_466749	Ehux_53827	Ehux_56408	Ehux_62132	Ehux_63150	Ehux_65184	Ehux_72264	Ehux_76857
OG0000132 Acas_g11169	Acas_g11278	Acas_g11279	Acas_g11622	Acas_g11969	Acas_g122	Acas_g13605	Acas_g13801	Acas_g14601	Acas_g14676	Acas_g15172	Acas_g15453	Acas_g17896	Acas_g18648	Acas_g64	Acas_g7871 Aque_XP_003384035	Aque_XP_003385287	Aque_XP_003385976	Aque_XP_003386508	Aque_XP_003388034	Aque_XP_003388431	Aque_XP_003389376	Aque_XP_003389515	Aque_XP_003390479	Aque_XP_003391668	Aque_XP_003391718	Aque_XP_003391815	Aque_XP_003391835	Aque_XP_003392052	Aque_XP_003392112 Atha_AT3G51690	Atha_AT3G51700	Atha_AT5G28780 Awhi_Unigene24706_m16049	Awhi_Unigene2780_m2003	Awhi_Unigene32556_m19993	Awhi_Unigene33101_m20500	Awhi_Unigene33102_m20501	Awhi_Unigene33104_m20502	Awhi_Unigene33105_m20503	Awhi_Unigene40656_m26006 Cang_103864	Cang_104734	Cang_116940	Cang_121286	Cang_158448	Cang_273727	Cang_282017	Cang_29565	Cang_36896	Cang_59199	Cang_70900	Cang_99650 Cfra_1496T1
OG0000133 Acas_g11401	Acas_g14577	Acas_g16941	Acas_g3988	Acas_g6250	Acas_g7033 Aque_XP_003384011	Aque_XP_003384012	Aque_XP_003385996	Aque_XP_003387542	Aque_XP_003388915	Aque_XP_003389469 Atha_AT1G01560	Atha_AT1G07880	Atha_AT1G10210	Atha_AT1G18150	Atha_AT1G53510	Atha_AT1G59580	Atha_AT1G73670	Atha_AT2G01450	Atha_AT2G18170	Atha_AT2G42880	Atha_AT2G43790	Atha_AT2G46070	Atha_AT3G14720	Atha_AT3G18040	Atha_AT3G45640	Atha_AT3G59790	Atha_AT4G01370	Atha_AT4G01595	Atha_AT4G11330	Atha_AT4G36450	Atha_AT5G19010 Awhi_Unigene23511_m15469	Awhi_Unigene26269_m16311	Awhi_Unigene35763_m22856	Awhi_Unigene7932_m5051	Awhi_Unigene7933_m5052	Awhi_Unigene8068_m5206 Cang_118076	Cang_121702	Cang_30772 Cfra_0929T1	Cfra_3899T1	Cfra_7629T1 Clim_g1355	Clim_g204	Clim_g3020	Clim_g4710 Cowc_CAOG_02578	Cowc_CAOG_04095	Cowc_CAOG_05850	Cowc_CAOG_08222 Nk52_evm14s2596	Nk52_evm18s164	Nk52_evm6s157	Nk52_evm7s2340 Ddis_XP_637704	Ddis_XP_638833 Dmel_FBpp0071264
OG0000134 Atha_AT1G05200	Atha_AT1G42540	Atha_AT2G17260	Atha_AT2G24710	Atha_AT2G24720	Atha_AT2G29100	Atha_AT2G29110	Atha_AT2G29120	Atha_AT2G32390	Atha_AT2G32400	Atha_AT3G04110	Atha_AT3G07520	Atha_AT3G51480	Atha_AT4G31710	Atha_AT4G35290	Atha_AT5G11180	Atha_AT5G11210	Atha_AT5G27100	Atha_AT5G48400	Atha_AT5G48410 Dmel_FBpp0070276	Dmel_FBpp0071268	Dmel_FBpp0074638	Dmel_FBpp0076160	Dmel_FBpp0076691	Dmel_FBpp0078410	Dmel_FBpp0078739	Dmel_FBpp0081058	Dmel_FBpp0083346	Dmel_FBpp0083391	Dmel_FBpp0088259	Dmel_FBpp0088541	Dmel_FBpp0110134	Dmel_FBpp0110195	Dmel_FBpp0110206	Dmel_FBpp0110256	Dmel_FBpp0271752	Dmel_FBpp0271900	Dmel_FBpp0288417	Dmel_FBpp0288996	Dmel_FBpp0291499 Ehux_106865	Ehux_120549	Ehux_218301	Ehux_352369	Ehux_366747 Hsap_ENSP00000234389	Hsap_ENSP00000263269	Hsap_ENSP00000264357	Hsap_ENSP00000264426	Hsap_ENSP00000279593	Hsap_ENSP00000282020	Hsap_ENSP00000282499
OG0000135 Acas_g15289	Acas_g3633 Aque_XP_003388125	Aque_XP_003388137	Aque_XP_003388626 Atha_AT1G12110	Atha_AT1G18880	Atha_AT1G22540	Atha_AT1G22550	Atha_AT1G22570	Atha_AT1G27040	Atha_AT1G27080	Atha_AT1G32450	Atha_AT1G33440	Atha_AT1G52190	Atha_AT1G59740	Atha_AT1G62200	Atha_AT1G68570	Atha_AT1G69850	Atha_AT1G69860	Atha_AT1G69870	Atha_AT1G72120	Atha_AT1G72125	Atha_AT1G72130	Atha_AT1G72140	Atha_AT2G02020	Atha_AT2G02040	Atha_AT2G26690	Atha_AT2G37900	Atha_AT2G40460	Atha_AT3G01350	Atha_AT3G16180	Atha_AT3G21670	Atha_AT3G25260	Atha_AT3G25280	Atha_AT3G47960	Atha_AT3G53960	Atha_AT3G54140	Atha_AT3G54450	Atha_AT4G21680	Atha_AT5G01180	Atha_AT5G13400	Atha_AT5G19640	Atha_AT5G46040	Atha_AT5G46050	Atha_AT5G62680	Atha_AT5G62730 Awhi_Unigene14450_m9121	Awhi_Unigene18356_m12357	Awhi_Unigene2407_m1718	Awhi_Unigene34156_m21191	Awhi_Unigene39622_m25361	Awhi_Unigene39623_m25362
OG0000136 Acas_g11525	Acas_g15206	Acas_g18435	Acas_g4096	Acas_g4554	Acas_g4665	Acas_g6124	Acas_g6960	Acas_g8206 Aque_XP_003382944	Aque_XP_003382945	Aque_XP_003386180	Aque_XP_003386831 Atha_AT1G04180	Atha_AT1G04610	Atha_AT1G12130	Atha_AT1G12140	Atha_AT1G12160	Atha_AT1G12200	Atha_AT1G19250	Atha_AT1G21430	Atha_AT1G48910	Atha_AT1G62540	Atha_AT1G62560	Atha_AT1G62570	Atha_AT1G62580	Atha_AT1G62600	Atha_AT1G62620	Atha_AT1G63340	Atha_AT1G63370	Atha_AT1G63390	Atha_AT1G65860	Atha_AT2G33230	Atha_AT4G13260	Atha_AT4G28720	Atha_AT4G32540	Atha_AT5G07800	Atha_AT5G11320	Atha_AT5G25620	Atha_AT5G43890	Atha_AT5G45180	Atha_AT5G61290 Awhi_Unigene11974_m7739	Awhi_Unigene17089_m10841	Awhi_Unigene19145_m12863	Awhi_Unigene37749_m24472	Awhi_Unigene5768_m3383	Awhi_Unigene5769_m3384 Cang_89862 Cfra_0851T1	Cfra_4377T1	Cfra_4998T1	Cfra_5763T1	Cfra_6601T1 Clim_g3114	Clim_g4821
OG0000137 Acas_g1332	Acas_g13398	Acas_g14554	Acas_g4509	Acas_g5875	Acas_g9853 Aque_XP_003382441	Aque_XP_003383896	Aque_XP_003385187	Aque_XP_003389238	Aque_XP_003389959 Atha_AT1G09580	Atha_AT1G14010	Atha_AT1G21900	Atha_AT1G26690	Atha_AT1G57620	Atha_AT1G69460	Atha_AT2G03040	Atha_AT2G03290	Atha_AT3G07680	Atha_AT3G10780	Atha_AT3G22845	Atha_AT3G29070 Awhi_Unigene17806_m11716	Awhi_Unigene18377_m12377	Awhi_Unigene20549_m14157	Awhi_Unigene31762_m19213	Awhi_Unigene34758_m21814	Awhi_Unigene6794_m3747	Awhi_Unigene7408_m4464	Awhi_Unigene7440_m4505 Cang_121821	Cang_152127	Cang_24647	Cang_46790 Cfra_1831T1	Cfra_4375T1	Cfra_4759T1	Cfra_4890T1	Cfra_5451T1	Cfra_6084T1 Clim_g1954	Clim_g2685	Clim_g33	Clim_g3865	Clim_g6187 Cowc_CAOG_01379	Cowc_CAOG_03289	Cowc_CAOG_03462	Cowc_CAOG_04993	Cowc_CAOG_05946 Nk52_evm20s292	Nk52_evm2s262	Nk52_evm38s221	Nk52_evm5s222	Nk52_evm91s221 Ddis_XP_628999	Ddis_XP_636960	Ddis_XP_641887
OG0000138 Acas_g1129	Acas_g11868	Acas_g12470	Acas_g14155	Acas_g2572	Acas_g2589	Acas_g7674 Aque_XP_003383737	Aque_XP_003384600	Aque_XP_003384827	Aque_XP_003388369 Atha_AT1G04980	Atha_AT1G07960	Atha_AT2G32920	Atha_AT2G47470 Awhi_Unigene18240_m12230	Awhi_Unigene18553_m12569	Awhi_Unigene19993_m13656	Awhi_Unigene31861_m19323	Awhi_Unigene34224_m21265	Awhi_Unigene36088_m23217 Cang_117329	Cang_126977	Cang_128948	Cang_33547	Cang_397504	Cang_46973 Cfra_2783T1	Cfra_5470T1	Cfra_6573T1	Cfra_7759T1	Cfra_7817T1	Cfra_8631T1 Clim_g3097	Clim_g4482	Clim_g612	Clim_g6177 Cowc_CAOG_04159	Cowc_CAOG_07195	Cowc_CAOG_08387 Nk52_evm4s1360	Nk52_evm6s386	Nk52_evm73s212 Ddis_XP_002649161	Ddis_XP_629171	Ddis_XP_643357	Ddis_XP_643858	Ddis_XP_644101	Ddis_XP_645462 Dmel_FBpp0073396	Dmel_FBpp0075212	Dmel_FBpp0080049	Dmel_FBpp0080395	Dmel_FBpp0084135 Ehux_198780	Ehux_199129	Ehux_199189	Ehux_201331	Ehux_212299	Ehux_212686	Ehux_415400
OG0000139 Acas_g10371	Acas_g14437	Acas_g5332 Aque_XP_003383925	Aque_XP_003386586 Atha_AT1G23880	Atha_AT1G23890	Atha_AT1G56500	Atha_AT1G70280	Atha_AT3G07060	Atha_AT3G14860	Atha_AT5G14890 Clim_g2185 Nk52_evm4s330 Dmel_FBpp0075887	Dmel_FBpp0110543 Ehux_100655	Ehux_100831	Ehux_115723	Ehux_117715	Ehux_200958	Ehux_208291	Ehux_208373	Ehux_208409	Ehux_213242	Ehux_216380	Ehux_217900	Ehux_220166	Ehux_222586	Ehux_224182	Ehux_224247	Ehux_226236	Ehux_229266	Ehux_231699	Ehux_237801	Ehux_237929	Ehux_239268	Ehux_241616	Ehux_241795	Ehux_246339	Ehux_246966	Ehux_249649	Ehux_309158	Ehux_311940	Ehux_349742	Ehux_353638	Ehux_357191	Ehux_359044	Ehux_363571	Ehux_42119	Ehux_433296	Ehux_434364	Ehux_434574	Ehux_44050	Ehux_440591	Ehux_44077
OG0000140 Acas_g1001	Acas_g10602	Acas_g10887	Acas_g12121	Acas_g13650	Acas_g14211	Acas_g14713	Acas_g1497	Acas_g15125	Acas_g15835	Acas_g2005	Acas_g2087	Acas_g2115	Acas_g2242	Acas_g3262	Acas_g3265	Acas_g3471	Acas_g3745	Acas_g3963	Acas_g5312	Acas_g5528	Acas_g5949	Acas_g6851	Acas_g6893	Acas_g753	Acas_g7787	Acas_g969 Atha_AT1G09740	Atha_AT1G11360	Atha_AT1G68300	Atha_AT2G03720	Atha_AT2G21620	Atha_AT2G47710	Atha_AT3G01520	Atha_AT3G03270	Atha_AT3G11930	Atha_AT3G17020	Atha_AT3G25930	Atha_AT3G53990	Atha_AT3G58450	Atha_AT3G62550	Atha_AT4G27320	Atha_AT5G14680	Atha_AT5G49050	Atha_AT5G54430 Awhi_Unigene16567_m10271	Awhi_Unigene17811_m11724	Awhi_Unigene18039_m11996	Awhi_Unigene28677_m17336	Awhi_Unigene5781_m3386 Cang_102767	Cang_103294	Cang_104401
OG0000141 Acas_g11765	Acas_g13958	Acas_g1443	Acas_g1819	Acas_g5347	Acas_g6009	Acas_g7686 Atha_AT1G19190	Atha_AT1G47480	Atha_AT1G49640	Atha_AT1G49650	Atha_AT1G49660	Atha_AT1G68620	Atha_AT2G03550	Atha_AT2G45600	Atha_AT2G45610	Atha_AT3G05120	Atha_AT3G27320	Atha_AT3G48690	Atha_AT3G48700	Atha_AT3G63010	Atha_AT5G06570	Atha_AT5G14310	Atha_AT5G16080	Atha_AT5G23530	Atha_AT5G27320	Atha_AT5G62180 Awhi_Unigene28116_m16829	Awhi_Unigene48_m51	Awhi_Unigene9522_m6654 Cang_186798	Cang_189269 Cfra_0237T1	Cfra_4390T1	Cfra_4644T1	Cfra_4682T1	Cfra_8068T1 Clim_g2349	Clim_g2962	Clim_g3450	Clim_g3585	Clim_g4291	Clim_g4676	Clim_g4865	Clim_g5035	Clim_g5542	Clim_g6836	Clim_g773	Clim_g849 Cowc_CAOG_01839	Cowc_CAOG_02924 Nk52_evm2s1869	Nk52_evm30s2402	Nk52_evm36s2402	Nk52_evm41s1705	Nk52_evm59s1020 Ddis_XP_635362	Ddis_XP_635423
OG0000142 Acas_g11692	Acas_g12621	Acas_g14765	Acas_g15337	Acas_g4677	Acas_g9338 Aque_XP_003383534	Aque_XP_003383535	Aque_XP_003383536	Aque_XP_003386158	Aque_XP_003387331	Aque_XP_003387332	Aque_XP_003387553	Aque_XP_003387554 Atha_AT1G48090	Atha_AT4G17140	Atha_AT5G24740 Awhi_Unigene10989_m7305	Awhi_Unigene11479_m7517	Awhi_Unigene13544_m8802	Awhi_Unigene18588_m12604	Awhi_Unigene18589_m12607	Awhi_Unigene19965_m13631	Awhi_Unigene24642_m16017	Awhi_Unigene38015_m24686	Awhi_Unigene38015_m24687	Awhi_Unigene38016_m24689	Awhi_Unigene38588_m24953 Cang_145561	Cang_77867 Cfra_3266T1	Cfra_5316T1	Cfra_5907T1 Clim_g1684	Clim_g3535 Cowc_CAOG_05101	Cowc_CAOG_07766	Cowc_CAOG_08245	Cowc_CAOG_08246 Nk52_evm10s859	Nk52_evm42s1444	Nk52_evm43s1444 Ddis_XP_637397	Ddis_XP_637643	Ddis_XP_637675	Ddis_XP_642696	Ddis_XP_644147	Ddis_XP_647037	Ddis_XP_647570 Dmel_FBpp0087984	Dmel_FBpp0271898 Ehux_218847	Ehux_218850	Ehux_223994	Ehux_227062	Ehux_237857	Ehux_433404	Ehux_448672	Ehux_451837	Ehux_453400	Ehux_453726
OG0000143 Aque_XP_003383488	Aque_XP_003383694	Aque_XP_003383695	Aque_XP_003383696	Aque_XP_003386248	Aque_XP_003386249	Aque_XP_003386366	Aque_XP_003387839	Aque_XP_003389566	Aque_XP_003391068	Aque_XP_003391963 Cowc_CAOG_01087	Cowc_CAOG_01092	Cowc_CAOG_02086	Cowc_CAOG_03740	Cowc_CAOG_05181	Cowc_CAOG_05278	Cowc_CAOG_05350	Cowc_CAOG_05351	Cowc_CAOG_06673	Cowc_CAOG_08320	Cowc_CAOG_08321	Cowc_CAOG_08470	Cowc_CAOG_08471	Cowc_CAOG_08472 Dmel_FBpp0073424	Dmel_FBpp0087688	Dmel_FBpp0111897	Dmel_FBpp0288795	Dmel_FBpp0289634	Dmel_FBpp0290270	Dmel_FBpp0291372 Hsap_ENSP00000205948	Hsap_ENSP00000236147	Hsap_ENSP00000243611	Hsap_ENSP00000263686	Hsap_ENSP00000297405	Hsap_ENSP00000313875	Hsap_ENSP00000314299	Hsap_ENSP00000331736	Hsap_ENSP00000344219	Hsap_ENSP00000356016	Hsap_ENSP00000356024	Hsap_ENSP00000356030	Hsap_ENSP00000356037	Hsap_ENSP00000356382	Hsap_ENSP00000356384	Hsap_ENSP00000356385	Hsap_ENSP00000356386	Hsap_ENSP00000356395	Hsap_ENSP00000356399	Hsap_ENSP00000362095	Hsap_ENSP00000362479
OG0000144 Aque_XP_003390972	Aque_XP_003391600 Nk52_evm1s2628 Dmel_FBpp0070857 Mlei_ML00042a	Mlei_ML00211a	Mlei_ML002235a	Mlei_ML002237a	Mlei_ML002240a	Mlei_ML002241a	Mlei_ML002621a	Mlei_ML005312a	Mlei_ML00575a	Mlei_ML00633a	Mlei_ML008023a	Mlei_ML008719a	Mlei_ML00945a	Mlei_ML010129a	Mlei_ML01125a	Mlei_ML012514a	Mlei_ML013414a	Mlei_ML01642a	Mlei_ML020062a	Mlei_ML021111a	Mlei_ML03461a	Mlei_ML03719a	Mlei_ML04053a	Mlei_ML056924a	Mlei_ML059821a	Mlei_ML06468a	Mlei_ML069136a	Mlei_ML06975a	Mlei_ML07219a	Mlei_ML07849a	Mlei_ML078932a	Mlei_ML08971a	Mlei_ML09104a	Mlei_ML09662a	Mlei_ML096917a	Mlei_ML10104a	Mlei_ML10216a	Mlei_ML104621a	Mlei_ML11101a	Mlei_ML12261a	Mlei_ML124241a	Mlei_ML128215a	Mlei_ML13321a	Mlei_ML135626a	Mlei_ML13783a	Mlei_ML138319a	Mlei_ML138320a	Mlei_ML14581a	Mlei_ML15637a
OG0000145 Acas_g11530	Acas_g11952	Acas_g12035	Acas_g12036	Acas_g13466	Acas_g15139	Acas_g16382	Acas_g18390	Acas_g3417	Acas_g725	Acas_g9315 Aque_XP_003384248	Aque_XP_003384651	Aque_XP_003387658	Aque_XP_003388601	Aque_XP_003388737	Aque_XP_003388738	Aque_XP_003389859 Atha_AT1G03060	Atha_AT1G58230	Atha_AT2G45540	Atha_AT3G60920	Atha_AT4G02660 Awhi_Unigene18064_m12021	Awhi_Unigene20666_m14263	Awhi_Unigene31714_m19159	Awhi_Unigene35733_m22825	Awhi_Unigene37116_m24028	Awhi_Unigene40695_m26030	Awhi_Unigene40696_m26031	Awhi_Unigene5795_m3394	Awhi_Unigene8128_m5273 Cfra_2008T1	Cfra_4301T1	Cfra_5149T1	Cfra_6171T1 Clim_g167	Clim_g3949	Clim_g4414	Clim_g925 Cowc_CAOG_01936	Cowc_CAOG_02982	Cowc_CAOG_04630	Cowc_CAOG_06544	Cowc_CAOG_06548 Nk52_evm131s221	Nk52_evm35s32	Nk52_evm47s745	Nk52_evm55s32	Nk52_evm85s62 Ddis_XP_638607	Ddis_XP_639293	Ddis_XP_640913	Ddis_XP_645593	Ddis_XP_645615	Ddis_XP_646110 Dmel_FBpp0072734	Dmel_FBpp0073080	Dmel_FBpp0078775
OG0000146 Acas_g10203	Acas_g11092	Acas_g18486	Acas_g4166	Acas_g6904	Acas_g9669 Aque_XP_003383168	Aque_XP_003388772 Atha_AT1G16800	Atha_AT1G65780	Atha_AT1G65810	Atha_AT2G03270	Atha_AT2G19120	Atha_AT4G05540	Atha_AT4G15570	Atha_AT4G30100	Atha_AT5G35970	Atha_AT5G37030	Atha_AT5G37140	Atha_AT5G37150	Atha_AT5G37160	Atha_AT5G47010	Atha_AT5G52090 Awhi_Unigene14887_m9363	Awhi_Unigene16384_m10085	Awhi_Unigene24076_m15754	Awhi_Unigene3029_m2205	Awhi_Unigene32744_m20174	Awhi_Unigene37056_m23982	Awhi_Unigene4606_m3086	Awhi_Unigene8536_m5722 Cang_120578	Cang_280458 Cfra_2295T1	Cfra_5556T1	Cfra_5618T1	Cfra_6159T1	Cfra_6907T1 Clim_g4315	Clim_g4977	Clim_g5610 Cowc_CAOG_01709	Cowc_CAOG_04560	Cowc_CAOG_06072	Cowc_CAOG_08730 Nk52_evm10s1992	Nk52_evm19s352	Nk52_evm6s252	Nk52_evm71s62 Ddis_XP_002649136	Ddis_XP_636183	Ddis_XP_636184	Ddis_XP_636490	Ddis_XP_644230	Ddis_XP_645520	Ddis_XP_646844	Ddis_XP_646847	Ddis_XP_646848	Ddis_XP_647058 Dmel_FBpp0073433
OG0000147 Acas_g4987 Aque_XP_003383317 Atha_AT1G11670	Atha_AT1G12950	Atha_AT1G15150	Atha_AT1G15160	Atha_AT1G15170	Atha_AT1G15180	Atha_AT1G23300	Atha_AT1G33080	Atha_AT1G33090	Atha_AT1G33100	Atha_AT1G33110	Atha_AT1G47530	Atha_AT1G58340	Atha_AT1G61890	Atha_AT1G64820	Atha_AT1G66760	Atha_AT1G66780	Atha_AT1G71140	Atha_AT1G71870	Atha_AT1G73700	Atha_AT2G04040	Atha_AT2G04050	Atha_AT2G04066	Atha_AT2G04070	Atha_AT2G04080	Atha_AT2G04090	Atha_AT2G04100	Atha_AT2G34360	Atha_AT2G38510	Atha_AT3G03620	Atha_AT3G21690	Atha_AT3G23550	Atha_AT3G23560	Atha_AT3G26590	Atha_AT3G59030	Atha_AT4G00350	Atha_AT4G21903	Atha_AT4G21910	Atha_AT4G22790	Atha_AT4G23030	Atha_AT4G25640	Atha_AT4G29140	Atha_AT5G10420	Atha_AT5G17700	Atha_AT5G19700	Atha_AT5G38030	Atha_AT5G44050	Atha_AT5G49130	Atha_AT5G52050	Atha_AT5G52450
OG0000148 Acas_g10680	Acas_g2873	Acas_g6461	Acas_g7525 Aque_XP_003382872	Aque_XP_003384106	Aque_XP_003387665 Atha_AT1G04860	Atha_AT1G17110	Atha_AT2G24640	Atha_AT2G32780	Atha_AT3G14400	Atha_AT4G17895	Atha_AT4G24560	Atha_AT4G31670	Atha_AT5G10790	Atha_AT5G46740	Atha_AT5G57990	Atha_AT5G65450 Awhi_Unigene20532_m14144	Awhi_Unigene2106_m1482	Awhi_Unigene2107_m1483	Awhi_Unigene2298_m1631	Awhi_Unigene29495_m18033	Awhi_Unigene29790_m18284 Cang_136715	Cang_35265	Cang_397153	Cang_54861 Cfra_0206T1	Cfra_6769T1	Cfra_7978T1	Cfra_8488T1 Clim_g5810	Clim_g6046	Clim_g6781 Cowc_CAOG_00185	Cowc_CAOG_01999	Cowc_CAOG_05870	Cowc_CAOG_09153 Nk52_evm22s294	Nk52_evm26s913	Nk52_evm42s2192	Nk52_evm4s272	Nk52_evm62s1073 Ddis_XP_643982	Ddis_XP_645473	Ddis_XP_647029 Dmel_FBpp0070738	Dmel_FBpp0076805	Dmel_FBpp0288698 Ehux_213396	Ehux_215678	Ehux_241818	Ehux_452900	Ehux_466164	Ehux_69418 Falb_H696_00328T0	Falb_H696_03384T0	Falb_H696_05807T0 Hsap_ENSP00000258499	Hsap_ENSP00000301962	Hsap_ENSP00000310590
OG0000149 Acas_g10086	Acas_g10133	Acas_g10411	Acas_g10412	Acas_g10424	Acas_g10585	Acas_g10625	Acas_g10826	Acas_g11876	Acas_g11877	Acas_g12057	Acas_g12135	Acas_g12140	Acas_g12324	Acas_g12507	Acas_g13018	Acas_g13026	Acas_g1305	Acas_g13163	Acas_g13166	Acas_g13196	Acas_g13263	Acas_g13296	Acas_g13344	Acas_g13345	Acas_g13348	Acas_g13430	Acas_g1352	Acas_g13560	Acas_g13574	Acas_g13575	Acas_g13614	Acas_g13636	Acas_g13637	Acas_g14244	Acas_g14356	Acas_g14626	Acas_g14956	Acas_g15051	Acas_g15106	Acas_g15245	Acas_g15248	Acas_g15292	Acas_g15539	Acas_g1604	Acas_g16764	Acas_g18243	Acas_g1985	Acas_g2093	Acas_g2121
OG0000150 Acas_g10303	Acas_g14865	Acas_g17257	Acas_g309	Acas_g5297	Acas_g5298	Acas_g6906	Acas_g9114 Aque_XP_003383404	Aque_XP_003383427	Aque_XP_003386458	Aque_XP_003387457	Aque_XP_003390805 Atha_AT1G21480	Atha_AT1G27440	Atha_AT1G34270	Atha_AT1G67410	Atha_AT1G74680	Atha_AT1G80290	Atha_AT2G28110	Atha_AT2G35100	Atha_AT3G03650	Atha_AT3G07620	Atha_AT3G42180	Atha_AT3G45400	Atha_AT3G55830	Atha_AT3G57630	Atha_AT4G16745	Atha_AT4G32790	Atha_AT4G38040	Atha_AT5G03795	Atha_AT5G11130	Atha_AT5G11610	Atha_AT5G16890	Atha_AT5G19670	Atha_AT5G20260	Atha_AT5G22940	Atha_AT5G25310	Atha_AT5G25820	Atha_AT5G33290	Atha_AT5G37000	Atha_AT5G44930	Atha_AT5G61840 Awhi_Unigene12625_m8154	Awhi_Unigene14840_m9338	Awhi_Unigene2544_m1819	Awhi_Unigene27748_m16707 Cfra_0148T1	Cfra_1391T1	Cfra_4253T1	Cfra_5877T1	Cfra_7966T1	Cfra_8603T1 Clim_g1593	Clim_g3582
OG0000151 Acas_g10109	Acas_g11257	Acas_g1199	Acas_g14026	Acas_g14229	Acas_g2399	Acas_g2969	Acas_g3917	Acas_g5793	Acas_g6084	Acas_g6682	Acas_g6741 Aque_XP_003387461	Aque_XP_003387909	Aque_XP_003388173	Aque_XP_003388174	Aque_XP_003390881	Aque_XP_003391494	Aque_XP_003391882	Aque_XP_003392037 Atha_AT1G06290	Atha_AT1G06310	Atha_AT2G35690	Atha_AT4G16760	Atha_AT5G65110 Awhi_Unigene16597_m10308	Awhi_Unigene2747_m1977	Awhi_Unigene7903_m5017 Cang_124142	Cang_49192	Cang_56859	Cang_60296	Cang_60969 Cfra_1952T1	Cfra_3174T1 Clim_g3147	Clim_g3710	Clim_g4589	Clim_g4853	Clim_g5499	Clim_g587 Cowc_CAOG_00694	Cowc_CAOG_00726	Cowc_CAOG_01552	Cowc_CAOG_03715 Nk52_evm14s1400	Nk52_evm21s2152	Nk52_evm7s351 Ddis_XP_001732973	Ddis_XP_635946	Ddis_XP_636605	Ddis_XP_637610	Ddis_XP_639137	Ddis_XP_642669	Ddis_XP_643323	Ddis_XP_645634	Ddis_XP_646395 Dmel_FBpp0070963	Dmel_FBpp0071532	Dmel_FBpp0071533
OG0000152 Acas_g1307	Acas_g14669	Acas_g3264	Acas_g5976 Aque_XP_003385601	Aque_XP_003387275	Aque_XP_003387291	Aque_XP_003387292 Atha_AT1G02920	Atha_AT1G02930	Atha_AT1G02940	Atha_AT1G02950	Atha_AT1G49860	Atha_AT2G02930	Atha_AT2G30860	Atha_AT2G30870	Atha_AT2G47730	Atha_AT3G03190	Atha_AT3G62760	Atha_AT4G02520	Atha_AT5G17220	Atha_AT5G41210	Atha_AT5G41220	Atha_AT5G41240	Atha_AT5G54220 Awhi_Unigene19812_m13489	Awhi_Unigene2806_m2019	Awhi_Unigene6801_m3755 Cfra_2156T1	Cfra_4102T1 Clim_g2747	Clim_g4447	Clim_g4495	Clim_g5211	Clim_g5745	Clim_g6210	Clim_g6211 Cowc_CAOG_02279	Cowc_CAOG_02792	Cowc_CAOG_05679	Cowc_CAOG_06256	Cowc_CAOG_07101 Nk52_evm103s914	Nk52_evm1s632	Nk52_evm38s217	Nk52_evm40s296	Nk52_evm59s226 Ddis_XP_628935	Ddis_XP_629346	Ddis_XP_637060	Ddis_XP_640961	Ddis_XP_643188	Ddis_XP_644030	Ddis_XP_644245	Ddis_XP_645340	Ddis_XP_645406 Dmel_FBpp0072341	Dmel_FBpp0073609	Dmel_FBpp0082041
OG0000153 Acas_g1337	Acas_g3562 Aque_XP_003384820	Aque_XP_003386328	Aque_XP_003386721	Aque_XP_003388019	Aque_XP_003388435 Awhi_Unigene28175_m16885	Awhi_Unigene31720_m19164	Awhi_Unigene31721_m19165	Awhi_Unigene35381_m22478	Awhi_Unigene6995_m4004 Cang_118924	Cang_122593	Cang_123900	Cang_141090	Cang_147147	Cang_159859	Cang_26328	Cang_59532	Cang_74591 Cfra_0837T1	Cfra_1129T1 Clim_g2687	Clim_g6539	Clim_g6542	Clim_g6613 Cowc_CAOG_01392	Cowc_CAOG_04210 Nk52_evm14s442	Nk52_evm16s1360	Nk52_evm20s745	Nk52_evm29s152	Nk52_evm29s2356	Nk52_evm30s226	Nk52_evm3s303	Nk52_evm3s526	Nk52_evm4s353	Nk52_evm5s2604 Ddis_XP_001732951	Ddis_XP_636380	Ddis_XP_638612 Dmel_FBpp0070485	Dmel_FBpp0071983	Dmel_FBpp0289061	Dmel_FBpp0289744 Ehux_108787	Ehux_42215	Ehux_436369 Falb_H696_00927T0	Falb_H696_00927T1	Falb_H696_04978T0 Hsap_ENSP00000243052	Hsap_ENSP00000264917	Hsap_ENSP00000270474	Hsap_ENSP00000282096	Hsap_ENSP00000291539	Hsap_ENSP00000311453	Hsap_ENSP00000332116	Hsap_ENSP00000345502	Hsap_ENSP00000351957	Hsap_ENSP00000356761
OG0000154 Acas_g12338	Acas_g2473	Acas_g2474 Aque_XP_003385628 Awhi_Unigene12568_m8117	Awhi_Unigene16885_m10630	Awhi_Unigene16886_m10633	Awhi_Unigene17098_m10851	Awhi_Unigene18331_m12331	Awhi_Unigene19922_m13594	Awhi_Unigene20184_m13818	Awhi_Unigene20447_m14064	Awhi_Unigene23729_m15572	Awhi_Unigene2589_m1860	Awhi_Unigene31270_m18737	Awhi_Unigene32193_m19638	Awhi_Unigene35004_m22085	Awhi_Unigene35484_m22584	Awhi_Unigene35485_m22586	Awhi_Unigene6967_m3964	Awhi_Unigene8133_m5278	Awhi_Unigene8134_m5281	Awhi_Unigene8135_m5283	Awhi_Unigene8136_m5285	Awhi_Unigene8446_m5633	Awhi_Unigene8953_m6202	Awhi_Unigene9836_m6806 Cang_124359	Cang_127269	Cang_128717	Cang_339206	Cang_59123 Cfra_1175T1	Cfra_1355T1	Cfra_2243T1	Cfra_4531T1	Cfra_4656T1	Cfra_5028T1	Cfra_5111T1	Cfra_5490T1	Cfra_6180T1	Cfra_6458T1	Cfra_6459T1	Cfra_6532T1	Cfra_6783T1	Cfra_7586T1 Clim_g1655	Clim_g4187	Clim_g4425	Clim_g457 Cowc_CAOG_02090	Cowc_CAOG_03836 Nk52_evm8s287 Dmel_FBpp0079583	Dmel_FBpp0082669	Dmel_FBpp0082672	Dmel_FBpp0082675	Dmel_FBpp0289317 Ehux_224905 Falb_H696_02649T0
OG0000155 Acas_g11027	Acas_g7852 Atha_AT2G29720	Atha_AT2G35660	Atha_AT4G15760	Atha_AT4G15765	Atha_AT4G38540	Atha_AT5G05320	Atha_AT5G11330	Atha_AT5G67030 Awhi_Unigene40485_m25895	Awhi_Unigene41174_m26296 Cang_39250	Cang_39758	Cang_43999 Cowc_CAOG_00660	Cowc_CAOG_07904 Ddis_XP_629710	Ddis_XP_635410	Ddis_XP_637706	Ddis_XP_641295 Ehux_201674	Ehux_219379	Ehux_226914	Ehux_236664	Ehux_350731	Ehux_456674	Ehux_457120	Ehux_461162	Ehux_462793	Ehux_463185	Ehux_467294	Ehux_468023 Ihof_9667 Mver_00161	Mver_00665	Mver_01463	Mver_02384	Mver_02428	Mver_02430	Mver_02432	Mver_02449	Mver_02451	Mver_02472	Mver_02473	Mver_02474	Mver_02475	Mver_02476	Mver_02501	Mver_02502	Mver_02539	Mver_03445	Mver_03458	Mver_03467	Mver_03469	Mver_03645	Mver_03827	Mver_03828
OG0000156 Acas_g10343	Acas_g10736	Acas_g10825	Acas_g10961	Acas_g11397	Acas_g11408	Acas_g1200	Acas_g1215	Acas_g12402	Acas_g13042	Acas_g13443	Acas_g15266	Acas_g1938	Acas_g2245	Acas_g2878	Acas_g4639	Acas_g478	Acas_g485	Acas_g5661	Acas_g5879	Acas_g6094	Acas_g6174	Acas_g6865	Acas_g9478	Acas_g9495	Acas_g9807 Aque_XP_003385285	Aque_XP_003385525	Aque_XP_003385691	Aque_XP_003389313 Atha_AT1G01780	Atha_AT1G10200	Atha_AT2G39900	Atha_AT2G45800	Atha_AT3G55770	Atha_AT3G61230 Awhi_Unigene11467_m7511	Awhi_Unigene13141_m8515	Awhi_Unigene16983_m10727	Awhi_Unigene17262_m11052	Awhi_Unigene17590_m11448	Awhi_Unigene17898_m11812	Awhi_Unigene17899_m11813	Awhi_Unigene18007_m11959	Awhi_Unigene18084_m12048	Awhi_Unigene28539_m17205	Awhi_Unigene8132_m5277	Awhi_Unigene8288_m5450	Awhi_Unigene9183_m6488	Awhi_Unigene9438_m6622 Cfra_2101T1	Cfra_5196T1	Cfra_7521T1 Clim_g5657	Clim_g7027 Cowc_CAOG_01691
OG0000157 Acas_g10831	Acas_g1179	Acas_g14480	Acas_g15616	Acas_g1584	Acas_g4257	Acas_g7543 Aque_XP_003386119 Atha_AT1G01310	Atha_AT1G50050	Atha_AT1G50060	Atha_AT2G14580	Atha_AT2G14610	Atha_AT2G19970	Atha_AT2G19980	Atha_AT2G19990	Atha_AT3G09590	Atha_AT3G19690	Atha_AT4G07820	Atha_AT4G25780	Atha_AT4G25790	Atha_AT4G30320	Atha_AT4G31470	Atha_AT4G33710	Atha_AT4G33720	Atha_AT4G33730	Atha_AT5G02730	Atha_AT5G26130	Atha_AT5G57625	Atha_AT5G66590 Awhi_Unigene32299_m19756 Cang_59257	Cang_76776 Dmel_FBpp0072710	Dmel_FBpp0077434	Dmel_FBpp0077438	Dmel_FBpp0081179	Dmel_FBpp0081182	Dmel_FBpp0082250	Dmel_FBpp0291567 Ehux_208842	Ehux_252996	Ehux_59804 Hsap_ENSP00000211238	Hsap_ENSP00000217043	Hsap_ENSP00000260113	Hsap_ENSP00000262207	Hsap_ENSP00000262424	Hsap_ENSP00000266659	Hsap_ENSP00000338276	Hsap_ENSP00000360201	Hsap_ENSP00000362778	Hsap_ENSP00000367196	Hsap_ENSP00000367967	Hsap_ENSP00000448248 Mlei_ML00624a	Mlei_ML01489a	Mlei_ML016324a
OG0000158 Acas_g2417	Acas_g3183	Acas_g3247	Acas_g3354	Acas_g6234	Acas_g7327	Acas_g9284 Aque_XP_003384672	Aque_XP_003386610	Aque_XP_003387439	Aque_XP_003387638 Atha_AT1G04190	Atha_AT1G12270	Atha_AT1G56090	Atha_AT1G56440	Atha_AT1G62740	Atha_AT3G04710	Atha_AT3G54030	Atha_AT4G08320	Atha_AT4G12400 Awhi_Unigene1033_m996	Awhi_Unigene10885_m7270	Awhi_Unigene13481_m8758	Awhi_Unigene14953_m9407	Awhi_Unigene17329_m11113	Awhi_Unigene28078_m16800	Awhi_Unigene3209_m2364	Awhi_Unigene6820_m3784 Cang_215385	Cang_362029	Cang_86336 Cfra_1495T1	Cfra_3485T1 Clim_g1857	Clim_g2062 Cowc_CAOG_00645	Cowc_CAOG_03979	Cowc_CAOG_07694 Nk52_evm29s1020	Nk52_evm3s2578	Nk52_evm56s78	Nk52_evm82s212 Ddis_XP_629588	Ddis_XP_629613	Ddis_XP_638715	Ddis_XP_639380	Ddis_XP_641391	Ddis_XP_641449	Ddis_XP_643707	Ddis_XP_646116 Dmel_FBpp0072164	Dmel_FBpp0077790	Dmel_FBpp0080535	Dmel_FBpp0082652	Dmel_FBpp0084076	Dmel_FBpp0084440	Dmel_FBpp0111383	Dmel_FBpp0111406 Ehux_100775	Ehux_110682	Ehux_110807
OG0000159 Acas_g10971	Acas_g11779	Acas_g15394 Aque_XP_003382970	Aque_XP_003384038	Aque_XP_003389250	Aque_XP_003391253 Atha_AT1G08880	Atha_AT1G51060	Atha_AT1G52740	Atha_AT1G54690	Atha_AT2G38810	Atha_AT3G20670	Atha_AT3G54560	Atha_AT4G13570	Atha_AT4G27230	Atha_AT5G02560	Atha_AT5G27670	Atha_AT5G54640	Atha_AT5G59870 Awhi_Unigene35382_m22479 Cang_117638	Cang_36991 Cfra_3583T1	Cfra_3673T1 Clim_g1698	Clim_g3472 Cowc_CAOG_00768	Cowc_CAOG_01815	Cowc_CAOG_02251	Cowc_CAOG_02297	Cowc_CAOG_04778	Cowc_CAOG_07959 Nk52_evm16s282	Nk52_evm1s1856	Nk52_evm1s231	Nk52_evm1s2610	Nk52_evm1s524	Nk52_evm20s2568 Ddis_XP_637656	Ddis_XP_641587 Dmel_FBpp0084434	Dmel_FBpp0085249	Dmel_FBpp0091099 Ehux_252655	Ehux_358281	Ehux_442150	Ehux_59242	Ehux_66170	Ehux_gb1	Ehux_gb4 Falb_H696_04901T0 Hsap_ENSP00000228929	Hsap_ENSP00000259791	Hsap_ENSP00000296417	Hsap_ENSP00000297012	Hsap_ENSP00000308405	Hsap_ENSP00000321389	Hsap_ENSP00000328484	Hsap_ENSP00000330307	Hsap_ENSP00000332194	Hsap_ENSP00000332790	Hsap_ENSP00000341094
OG0000160 Acas_g736	Acas_g7361	Acas_g9466 Aque_XP_003384273	Aque_XP_003384965	Aque_XP_003384970	Aque_XP_003384971	Aque_XP_003386622	Aque_XP_003387320	Aque_XP_003388199 Awhi_Unigene14415_m9101	Awhi_Unigene16800_m10547	Awhi_Unigene17674_m11559	Awhi_Unigene18126_m12105	Awhi_Unigene20868_m14452	Awhi_Unigene20869_m14453	Awhi_Unigene23964_m15695	Awhi_Unigene9093_m6382 Cang_107686	Cang_43384	Cang_67643 Cfra_2244T1	Cfra_5080T1	Cfra_5437T1	Cfra_5540T1	Cfra_5903T1	Cfra_7164T1 Clim_g1434	Clim_g1755	Clim_g2019	Clim_g2462	Clim_g2639	Clim_g2744	Clim_g3441	Clim_g656 Cowc_CAOG_01604	Cowc_CAOG_03722	Cowc_CAOG_04055	Cowc_CAOG_04324	Cowc_CAOG_05952	Cowc_CAOG_06368 Nk52_evm16s233	Nk52_evm21s2506	Nk52_evm27s2506	Nk52_evm29s266	Nk52_evm33s914 Dmel_FBpp0072848	Dmel_FBpp0080012	Dmel_FBpp0081231	Dmel_FBpp0082848	Dmel_FBpp0084605	Dmel_FBpp0088397	Dmel_FBpp0290496 Ehux_221694	Ehux_221695	Ehux_228125	Ehux_247089	Ehux_260113	Ehux_365211
OG0000161 Acas_g10706	Acas_g12510	Acas_g15347	Acas_g5627 Aque_XP_003384066	Aque_XP_003385422	Aque_XP_003386282	Aque_XP_003389167	Aque_XP_003389996	Aque_XP_003390208	Aque_XP_003391719 Atha_AT1G01580	Atha_AT1G01590	Atha_AT1G09090	Atha_AT1G19230	Atha_AT1G23020	Atha_AT1G64060	Atha_AT3G45810	Atha_AT4G11230	Atha_AT4G25090	Atha_AT5G07390	Atha_AT5G23980	Atha_AT5G23990	Atha_AT5G47910	Atha_AT5G49730	Atha_AT5G49740	Atha_AT5G50160	Atha_AT5G51060	Atha_AT5G60010 Awhi_Unigene17563_m11409	Awhi_Unigene1979_m1392	Awhi_Unigene24086_m15760	Awhi_Unigene26983_m16528	Awhi_Unigene39257_m25139	Awhi_Unigene9719_m6745	Awhi_Unigene994_m961 Cang_118963	Cang_126224	Cang_53392	Cang_64493	Cang_71332 Cfra_4739T1	Cfra_8136T1 Clim_g444	Clim_g4563 Cowc_CAOG_06499 Nk52_evm32s2531	Nk52_evm34s2531	Nk52_evm5s1869 Ddis_XP_635387	Ddis_XP_636064	Ddis_XP_637386 Dmel_FBpp0111562	Dmel_FBpp0289611 Ehux_123711	Ehux_201052	Ehux_205158	Ehux_215378	Ehux_225553	Ehux_232597	Ehux_246122
OG0000162 Cang_136950	Cang_44041	Cang_90246 Clim_g1493	Clim_g2030	Clim_g2497	Clim_g2498	Clim_g2499	Clim_g4183	Clim_g4573	Clim_g5467	Clim_g5606	Clim_g5771	Clim_g5938	Clim_g5959	Clim_g6060	Clim_g6452	Clim_g6645	Clim_g6846	Clim_g6847 Dmel_FBpp0070377	Dmel_FBpp0072490	Dmel_FBpp0085408	Dmel_FBpp0085473	Dmel_FBpp0086346	Dmel_FBpp0086661	Dmel_FBpp0087139	Dmel_FBpp0271696	Dmel_FBpp0289988	Dmel_FBpp0291719 Hsap_ENSP00000261187	Hsap_ENSP00000276033	Hsap_ENSP00000295190	Hsap_ENSP00000309751	Hsap_ENSP00000310490	Hsap_ENSP00000319991	Hsap_ENSP00000321735	Hsap_ENSP00000330141	Hsap_ENSP00000357844	Hsap_ENSP00000358640	Hsap_ENSP00000358794	Hsap_ENSP00000360855	Hsap_ENSP00000376150	Hsap_ENSP00000378756	Hsap_ENSP00000401941 Mver_00536	Mver_01659	Mver_02583	Mver_02584	Mver_02585	Mver_05374	Mver_05857	Mver_05866	Mver_06895
OG0000163 Acas_g11581	Acas_g12658	Acas_g12789	Acas_g13992	Acas_g14514	Acas_g1462	Acas_g18342	Acas_g2609	Acas_g3574	Acas_g399	Acas_g4580	Acas_g612	Acas_g7729	Acas_g7730	Acas_g8423 Aque_XP_003389602	Aque_XP_003389603	Aque_XP_003390582 Atha_AT1G02670	Atha_AT1G05120	Atha_AT1G11100	Atha_AT1G50410	Atha_AT1G61140	Atha_AT3G16600	Atha_AT3G20010	Atha_AT5G05130	Atha_AT5G22750	Atha_AT5G43530 Awhi_Unigene1076_m1062	Awhi_Unigene12140_m7847	Awhi_Unigene21303_m14771	Awhi_Unigene268_m239	Awhi_Unigene26998_m16535	Awhi_Unigene28292_m16987	Awhi_Unigene2872_m2072	Awhi_Unigene33332_m20745	Awhi_Unigene34769_m21828	Awhi_Unigene35694_m22791	Awhi_Unigene37226_m24098	Awhi_Unigene37510_m24297	Awhi_Unigene624_m597 Cang_106271	Cang_121571	Cang_122203	Cang_123738	Cang_126726	Cang_127939	Cang_130367	Cang_35310	Cang_38216	Cang_398735	Cang_58728 Cfra_3731T1	Cfra_6066T1 Clim_g2116	Clim_g238
OG0000164 Acas_g11608	Acas_g3894	Acas_g4091	Acas_g4990	Acas_g8144	Acas_g9666 Aque_XP_003384042	Aque_XP_003388108	Aque_XP_003390621	Aque_XP_003390623 Atha_AT1G52870	Atha_AT2G14860	Atha_AT2G42770	Atha_AT3G24570	Atha_AT4G03410	Atha_AT4G04470	Atha_AT4G14305	Atha_AT4G33905	Atha_AT5G19750	Atha_AT5G43140 Awhi_Unigene19376_m13084	Awhi_Unigene3109_m2286	Awhi_Unigene3276_m2419	Awhi_Unigene35243_m22334 Cang_117133	Cang_119831	Cang_332814	Cang_41621	Cang_62587 Cfra_4940T1	Cfra_5289T1	Cfra_7233T1 Clim_g56	Clim_g6384	Clim_g6538 Cowc_CAOG_00806	Cowc_CAOG_01752	Cowc_CAOG_05261	Cowc_CAOG_06842 Nk52_evm10s232	Nk52_evm15s208	Nk52_evm1s68	Nk52_evm37s355	Nk52_evm78s207 Ddis_XP_635703	Ddis_XP_635840	Ddis_XP_642423	Ddis_XP_642741 Dmel_FBpp0070243	Dmel_FBpp0070244	Dmel_FBpp0072645	Dmel_FBpp0073039	Dmel_FBpp0073040	Dmel_FBpp0073607	Dmel_FBpp0075803	Dmel_FBpp0088286	Dmel_FBpp0112245	Dmel_FBpp0290527 Ehux_103689	Ehux_104368	Ehux_113825
OG0000165 Aque_XP_003388461 Awhi_Unigene10856_m7253	Awhi_Unigene16413_m10114	Awhi_Unigene18194_m12176	Awhi_Unigene18195_m12177	Awhi_Unigene18196_m12178	Awhi_Unigene20830_m14415	Awhi_Unigene21298_m14769	Awhi_Unigene26971_m16522	Awhi_Unigene435_m433 Clim_g2073	Clim_g4280	Clim_g4433	Clim_g6001	Clim_g6954	Clim_g7013 Dmel_FBpp0070763	Dmel_FBpp0072269	Dmel_FBpp0076158	Dmel_FBpp0077136	Dmel_FBpp0079102	Dmel_FBpp0079126	Dmel_FBpp0079130	Dmel_FBpp0080247	Dmel_FBpp0085877	Dmel_FBpp0086271	Dmel_FBpp0087080	Dmel_FBpp0087558	Dmel_FBpp0088910	Dmel_FBpp0112979	Dmel_FBpp0289933	Dmel_FBpp0290086	Dmel_FBpp0290385	Dmel_FBpp0291680	Dmel_FBpp0291681 Ehux_217075	Ehux_259028	Ehux_440057	Ehux_462780	Ehux_466353 Hsap_ENSP00000219833	Hsap_ENSP00000254488	Hsap_ENSP00000266682	Hsap_ENSP00000270349	Hsap_ENSP00000287766	Hsap_ENSP00000305302	Hsap_ENSP00000323549	Hsap_ENSP00000329205	Hsap_ENSP00000330199	Hsap_ENSP00000338627	Hsap_ENSP00000339260	Hsap_ENSP00000346298	Hsap_ENSP00000352702	Hsap_ENSP00000352933	Hsap_ENSP00000353791
OG0000166 Acas_g1280	Acas_g12922	Acas_g1308	Acas_g2864	Acas_g2956	Acas_g6384	Acas_g9160 Aque_XP_003389036	Aque_XP_003390218	Aque_XP_003390221 Atha_AT1G49430	Atha_AT1G64400	Atha_AT1G77590	Atha_AT2G04350	Atha_AT2G47240	Atha_AT3G05970	Atha_AT4G11030	Atha_AT4G23850	Atha_AT5G27600 Awhi_Unigene16326_m10021	Awhi_Unigene16966_m10710	Awhi_Unigene16974_m10717	Awhi_Unigene18482_m12497	Awhi_Unigene20468_m14083	Awhi_Unigene35038_m22121	Awhi_Unigene4003_m2968 Cang_139059	Cang_141418	Cang_143197	Cang_41242	Cang_49634	Cang_49846	Cang_63250 Cfra_0858T1	Cfra_2081T1	Cfra_2230T1	Cfra_3233T1	Cfra_3392T1	Cfra_6852T1	Cfra_6999T1 Clim_g1730	Clim_g4240	Clim_g5530	Clim_g5805 Cowc_CAOG_00771	Cowc_CAOG_01501 Nk52_evm101s224 Ddis_XP_001134470	Ddis_XP_646065 Dmel_FBpp0074844	Dmel_FBpp0099845 Ehux_197433	Ehux_225887	Ehux_308982	Ehux_353558	Ehux_418537	Ehux_459357	Ehux_469801	Ehux_74898 Falb_H696_01210T0	Falb_H696_02103T0	Falb_H696_02104T0 Hsap_ENSP00000281455
OG0000167 Acas_g11924	Acas_g15232	Acas_g17946	Acas_g640 Aque_XP_003386168	Aque_XP_003389351	Aque_XP_003389352 Atha_AT1G02690	Atha_AT1G09270	Atha_AT1G32880	Atha_AT3G05720	Atha_AT3G06720	Atha_AT4G02150	Atha_AT4G16143	Atha_AT5G03070	Atha_AT5G49310	Atha_AT5G52000 Awhi_Unigene11546_m7546	Awhi_Unigene1206_m1178	Awhi_Unigene12434_m8039	Awhi_Unigene16828_m10584	Awhi_Unigene16829_m10585	Awhi_Unigene18184_m12172	Awhi_Unigene19366_m13069	Awhi_Unigene21902_m14972	Awhi_Unigene22675_m15207	Awhi_Unigene28669_m17329	Awhi_Unigene29135_m17713	Awhi_Unigene32089_m19541	Awhi_Unigene33400_m20819	Awhi_Unigene34336_m21367	Awhi_Unigene6202_m3540	Awhi_Unigene6203_m3541	Awhi_Unigene6832_m3803	Awhi_Unigene6833_m3804	Awhi_Unigene772_m770 Cang_122994	Cang_50354	Cang_67172 Cfra_1251T1	Cfra_2458T1	Cfra_3859T1	Cfra_4226T1	Cfra_7932T1 Clim_g5701	Clim_g6341 Cowc_CAOG_01181	Cowc_CAOG_01711	Cowc_CAOG_03157	Cowc_CAOG_04661	Cowc_CAOG_04781	Cowc_CAOG_08200 Nk52_evm12s262	Nk52_evm1s2554	Nk52_evm33s1129 Ddis_XP_641879	Ddis_XP_642059	Ddis_XP_644344	Ddis_XP_644836
OG0000168 Acas_g12966	Acas_g14220	Acas_g2111	Acas_g4589	Acas_g7139	Acas_g7197	Acas_g8999 Aque_XP_003382657	Aque_XP_003383187	Aque_XP_003384167	Aque_XP_003385496	Aque_XP_003385805	Aque_XP_003386358	Aque_XP_003386884	Aque_XP_003387101	Aque_XP_003388513 Atha_AT1G32850	Atha_AT2G40930	Atha_AT4G10570	Atha_AT4G10590	Atha_AT5G22030 Awhi_Unigene13606_m8843	Awhi_Unigene16606_m10321	Awhi_Unigene32956_m20358	Awhi_Unigene40571_m25939	Awhi_Unigene8016_m5146 Cang_121206	Cang_130337	Cang_36451	Cang_39829 Cfra_1432T1	Cfra_1685T1	Cfra_8199T1	Cfra_8353T1 Clim_g1205	Clim_g2658	Clim_g3029	Clim_g5535	Clim_g6322 Cowc_CAOG_02196	Cowc_CAOG_05444	Cowc_CAOG_05894	Cowc_CAOG_06488	Cowc_CAOG_07171	Cowc_CAOG_08488	Cowc_CAOG_08489 Nk52_evm29s370	Nk52_evm30s352	Nk52_evm39s2391	Nk52_evm3s292	Nk52_evm42s2657	Nk52_evm58s239	Nk52_evm8s675 Ddis_XP_628978	Ddis_XP_638597	Ddis_XP_644261 Dmel_FBpp0072276	Dmel_FBpp0074659	Dmel_FBpp0077041	Dmel_FBpp0083419 Ehux_105327
OG0000169 Acas_g2712 Aque_XP_003384629	Aque_XP_003384705	Aque_XP_003386803	Aque_XP_003387401	Aque_XP_003388427	Aque_XP_003389638 Atha_AT3G10220 Awhi_Unigene13399_m8699	Awhi_Unigene16481_m10187	Awhi_Unigene20628_m14230	Awhi_Unigene39377_m25203	Awhi_Unigene7592_m4663	Awhi_Unigene8188_m5340 Cang_100386	Cang_122819	Cang_125479	Cang_36244 Cfra_3072T1	Cfra_3406T1	Cfra_3753T1	Cfra_4740T1	Cfra_7037T1 Clim_g2082	Clim_g288	Clim_g366	Clim_g3898	Clim_g5640	Clim_g5717 Cowc_CAOG_02134	Cowc_CAOG_04408	Cowc_CAOG_05006	Cowc_CAOG_08378 Nk52_evm10s245	Nk52_evm28s294	Nk52_evm59s78	Nk52_evm74s208	Nk52_evm7s128	Nk52_evm9s208 Ddis_XP_641173	Ddis_XP_642051 Dmel_FBpp0074744	Dmel_FBpp0075498	Dmel_FBpp0077346	Dmel_FBpp0080529	Dmel_FBpp0085690 Ehux_193900	Ehux_225089	Ehux_361800	Ehux_440500	Ehux_468865	Ehux_76170 Falb_H696_04297T0	Falb_H696_05607T0 Hsap_ENSP00000221855	Hsap_ENSP00000223398	Hsap_ENSP00000353732	Hsap_ENSP00000354791	Hsap_ENSP00000368859	Hsap_ENSP00000439093 Ihof_10515	Ihof_10718	Ihof_1093	Ihof_5724
OG0000170 Acas_g12308	Acas_g342	Acas_g5639 Aque_XP_003391681 Awhi_Unigene34795_m21851	Awhi_Unigene39884_m25522 Cowc_CAOG_03412 Nk52_evm10s263 Ddis_XP_635698	Ddis_XP_646034	Ddis_XP_646340 Ehux_216276	Ehux_48983	Ehux_71253 Falb_H696_00997T0	Falb_H696_01011T0	Falb_H696_01051T0	Falb_H696_01890T0	Falb_H696_02544T0	Falb_H696_02752T0	Falb_H696_02821T0	Falb_H696_03225T0	Falb_H696_03231T0	Falb_H696_03234T0	Falb_H696_03238T0	Falb_H696_03244T0	Falb_H696_03249T0	Falb_H696_03261T0	Falb_H696_03270T0	Falb_H696_03276T0	Falb_H696_03283T0	Falb_H696_03285T0	Falb_H696_03286T0	Falb_H696_03457T0	Falb_H696_03662T0	Falb_H696_03801T0	Falb_H696_03904T0	Falb_H696_03905T0	Falb_H696_03905T1	Falb_H696_03905T2	Falb_H696_04185T0	Falb_H696_04658T0	Falb_H696_04671T0	Falb_H696_04686T0	Falb_H696_04692T0	Falb_H696_05045T0	Falb_H696_05063T0	Falb_H696_05069T0	Falb_H696_05092T0	Falb_H696_05094T0	Falb_H696_05377T0	Falb_H696_05384T0	Falb_H696_05389T0	Falb_H696_05392T0	Falb_H696_05395T0	Falb_H696_05399T0	Falb_H696_05400T0
OG0000171 Acas_g1008	Acas_g10572	Acas_g13246	Acas_g16661	Acas_g1822	Acas_g18433	Acas_g3001	Acas_g4439	Acas_g4440	Acas_g7508	Acas_g7523	Acas_g8968	Acas_g8978 Aque_XP_003383384	Aque_XP_003383528	Aque_XP_003386535 Atha_AT1G01620	Atha_AT1G17810	Atha_AT1G31885	Atha_AT1G52180	Atha_AT1G73190	Atha_AT1G80760	Atha_AT2G16850	Atha_AT2G25810	Atha_AT2G29870	Atha_AT2G34390	Atha_AT2G36830	Atha_AT2G37170	Atha_AT2G37180	Atha_AT2G39010	Atha_AT2G45960	Atha_AT3G06100	Atha_AT3G16240	Atha_AT3G26520	Atha_AT3G47440	Atha_AT3G53420	Atha_AT3G54820	Atha_AT3G61430	Atha_AT4G00430	Atha_AT4G01470	Atha_AT4G10380	Atha_AT4G17340	Atha_AT4G18910	Atha_AT4G19030	Atha_AT4G23400	Atha_AT4G35100	Atha_AT5G37810	Atha_AT5G37820	Atha_AT5G47450	Atha_AT5G60660 Awhi_Unigene30519_m18620	Awhi_Unigene38550_m24943	Awhi_Unigene6524_m3660 Cang_121467
OG0000172 Acas_g10082	Acas_g13034	Acas_g2047	Acas_g2073	Acas_g2636	Acas_g3293 Aque_XP_003384138	Aque_XP_003386893	Aque_XP_003391250 Atha_AT1G09200	Atha_AT1G13370	Atha_AT1G19890	Atha_AT1G75600	Atha_AT4G40030	Atha_AT5G12910	Atha_AT5G65350 Awhi_Unigene18234_m12226	Awhi_Unigene18384_m12385	Awhi_Unigene31979_m19428	Awhi_Unigene35473_m22570	Awhi_Unigene417_m408	Awhi_Unigene6828_m3796 Cang_36656	Cang_38916 Cfra_0618T1	Cfra_3582T1	Cfra_3674T1	Cfra_4727T1 Clim_g1346	Clim_g4067 Cowc_CAOG_01816	Cowc_CAOG_02342	Cowc_CAOG_03668	Cowc_CAOG_07177 Nk52_evm12s215	Nk52_evm1s269	Nk52_evm1s499	Nk52_evm28s1401	Nk52_evm2s2286	Nk52_evm2s2418	Nk52_evm5s2256	Nk52_evm6s70 Ddis_XP_646791	Ddis_XP_646792	Ddis_XP_647577 Dmel_FBpp0071280	Dmel_FBpp0085250 Ehux_103498	Ehux_461181	Ehux_48267	Ehux_65361 Falb_H696_04899T0 Hsap_ENSP00000244661	Hsap_ENSP00000254810	Hsap_ENSP00000333277	Hsap_ENSP00000339835	Hsap_ENSP00000355657	Hsap_ENSP00000376675 Ihof_1188	Ihof_2403	Ihof_3168	Ihof_362	Ihof_4503	Ihof_4961
OG0000173 Acas_g10701	Acas_g1093	Acas_g10997	Acas_g13520	Acas_g14395	Acas_g14679	Acas_g14809	Acas_g15475	Acas_g1699	Acas_g4110	Acas_g583	Acas_g6478	Acas_g6481	Acas_g6545	Acas_g7307	Acas_g8971	Acas_g9057 Aque_XP_003385077	Aque_XP_003385078	Aque_XP_003385391	Aque_XP_003386806	Aque_XP_003387472	Aque_XP_003387473	Aque_XP_003388848 Atha_AT1G13750	Atha_AT1G13900	Atha_AT1G52940	Atha_AT1G56360	Atha_AT2G03450	Atha_AT2G16430	Atha_AT2G18130	Atha_AT2G27190	Atha_AT2G32770	Atha_AT3G07130	Atha_AT3G20500	Atha_AT3G46120	Atha_AT3G52780	Atha_AT3G52810	Atha_AT3G52820	Atha_AT4G13700	Atha_AT4G24890	Atha_AT4G36350	Atha_AT5G34850	Atha_AT5G50400 Awhi_Unigene32414_m19871	Awhi_Unigene32415_m19872	Awhi_Unigene32416_m19873	Awhi_Unigene34995_m22076	Awhi_Unigene36009_m23125	Awhi_Unigene36010_m23126	Awhi_Unigene36011_m23127 Cfra_2173T1 Clim_g3223	Clim_g6416	Clim_g6718 Cowc_CAOG_02793
OG0000174 Acas_g10091	Acas_g11639	Acas_g14290	Acas_g14733	Acas_g17371	Acas_g5159	Acas_g7267	Acas_g754	Acas_g7753	Acas_g8159 Aque_XP_003382977 Atha_AT1G01920	Atha_AT1G14030	Atha_AT1G24610	Atha_AT2G18850	Atha_AT3G07670	Atha_AT3G55080	Atha_AT3G56570	Atha_AT4G20130	Atha_AT5G14260	Atha_AT5G17240 Awhi_Unigene28096_m16816	Awhi_Unigene31572_m19009	Awhi_Unigene34519_m21553	Awhi_Unigene36226_m23392	Awhi_Unigene36227_m23393 Cang_114976	Cang_156814	Cang_43579	Cang_60646	Cang_64968 Cfra_1641T1	Cfra_3222T1	Cfra_4269T1	Cfra_4287T1	Cfra_4346T1 Clim_g2364	Clim_g2679	Clim_g3684	Clim_g6028 Cowc_CAOG_00472	Cowc_CAOG_00643	Cowc_CAOG_01287	Cowc_CAOG_02820	Cowc_CAOG_03170	Cowc_CAOG_04094	Cowc_CAOG_04380	Cowc_CAOG_05002	Cowc_CAOG_05107	Cowc_CAOG_05400	Cowc_CAOG_05634	Cowc_CAOG_06253	Cowc_CAOG_08575 Nk52_evm15s2474	Nk52_evm27s1073	Nk52_evm89s62	Nk52_evm8s442 Ddis_XP_637036	Ddis_XP_640721
OG0000175 Acas_g10444	Acas_g11776	Acas_g13993	Acas_g14657	Acas_g16283	Acas_g16453	Acas_g16900	Acas_g2210	Acas_g3739	Acas_g5017	Acas_g6324	Acas_g7719	Acas_g8909	Acas_g8936 Aque_XP_003382666	Aque_XP_003384049	Aque_XP_003384085 Atha_AT1G04420	Atha_AT1G04690	Atha_AT1G10810	Atha_AT1G60680	Atha_AT1G60690	Atha_AT1G60710	Atha_AT1G60730	Atha_AT1G60750	Atha_AT4G33670 Awhi_Unigene1855_m1282	Awhi_Unigene2642_m1906 Cang_33927 Cfra_1770T1	Cfra_4311T1 Clim_g3055	Clim_g764 Cowc_CAOG_05788	Cowc_CAOG_07650	Cowc_CAOG_08373 Nk52_evm31s78 Dmel_FBpp0081978	Dmel_FBpp0081979	Dmel_FBpp0081980	Dmel_FBpp0088745 Ehux_198823	Ehux_216971	Ehux_240414	Ehux_310078	Ehux_425873	Ehux_437509	Ehux_440426	Ehux_462242	Ehux_54940	Ehux_68207	Ehux_76803 Falb_H696_00534T0 Hsap_ENSP00000235835	Hsap_ENSP00000302719	Hsap_ENSP00000355377	Hsap_ENSP00000367323	Hsap_ENSP00000411913	Hsap_ENSP00000419952 Ihof_764	Ihof_8633 Mlei_ML03598a	Mlei_ML274432a	Mlei_ML274433a Mver_00426
OG0000176 Aque_XP_003383563	Aque_XP_003384519	Aque_XP_003384646	Aque_XP_003388905	Aque_XP_003388906	Aque_XP_003391916 Awhi_Unigene18441_m12455	Awhi_Unigene18556_m12574	Awhi_Unigene225_m177	Awhi_Unigene30985_m18690	Awhi_Unigene4276_m3031	Awhi_Unigene6956_m3945	Awhi_Unigene7119_m4160 Cang_106902	Cang_41569	Cang_43472	Cang_57853	Cang_61581	Cang_83744 Cfra_0834T1	Cfra_1904T1	Cfra_6401T1 Clim_g113	Clim_g3928 Cowc_CAOG_01377	Cowc_CAOG_04850	Cowc_CAOG_05752	Cowc_CAOG_08362	Cowc_CAOG_08580 Nk52_evm1s1772	Nk52_evm27s745	Nk52_evm47s221	Nk52_evm69s2192 Dmel_FBpp0074139	Dmel_FBpp0076897	Dmel_FBpp0083352	Dmel_FBpp0087869	Dmel_FBpp0087952 Ehux_217449	Ehux_217757	Ehux_218407	Ehux_218408	Ehux_356178	Ehux_370996	Ehux_436840	Ehux_441766	Ehux_469592 Falb_H696_00378T0	Falb_H696_00773T0	Falb_H696_01484T0	Falb_H696_02866T0	Falb_H696_05567T0 Hsap_ENSP00000239730	Hsap_ENSP00000268231	Hsap_ENSP00000324511	Hsap_ENSP00000349116	Hsap_ENSP00000367991	Hsap_ENSP00000372515	Hsap_ENSP00000373627	Hsap_ENSP00000375833
OG0000177 Acas_g10288	Acas_g11549	Acas_g12	Acas_g12038	Acas_g13990	Acas_g14649	Acas_g18471	Acas_g18566	Acas_g8016	Acas_g8269	Acas_g8816	Acas_g8817 Atha_AT5G35930 Awhi_Unigene13090_m8476	Awhi_Unigene13470_m8751	Awhi_Unigene14319_m9073	Awhi_Unigene15513_m9704	Awhi_Unigene19782_m13462	Awhi_Unigene20900_m14488	Awhi_Unigene21473_m14837	Awhi_Unigene22269_m15097	Awhi_Unigene27010_m16540	Awhi_Unigene27417_m16679	Awhi_Unigene29339_m17875	Awhi_Unigene33458_m20872	Awhi_Unigene34240_m21278	Awhi_Unigene5821_m3405	Awhi_Unigene7351_m4413 Cang_53151 Cfra_2349T1	Cfra_3248T1	Cfra_3994T1	Cfra_4436T1	Cfra_5101T1	Cfra_5995T1	Cfra_6394T1	Cfra_6471T1	Cfra_8023T1 Clim_g3687	Clim_g500 Cowc_CAOG_06995 Nk52_evm110s224	Nk52_evm20s160	Nk52_evm22s225	Nk52_evm23s225	Nk52_evm24s2657	Nk52_evm26s160	Nk52_evm45s1444	Nk52_evm7s291 Ddis_XP_635872	Ddis_XP_636931	Ddis_XP_637198	Ddis_XP_646097 Dmel_FBpp0083505 Ehux_125147	Ehux_199113	Ehux_207972	Ehux_227706	Ehux_230594	Ehux_314459
OG0000178 Acas_g10279	Acas_g10607	Acas_g11348	Acas_g1149	Acas_g11491	Acas_g11571	Acas_g11704	Acas_g11872	Acas_g12116	Acas_g12193	Acas_g12268	Acas_g12289	Acas_g12657	Acas_g13358	Acas_g1775	Acas_g2661	Acas_g3379	Acas_g3456	Acas_g4800	Acas_g5224	Acas_g5284	Acas_g5585	Acas_g5712	Acas_g5904	Acas_g6731	Acas_g7031	Acas_g71	Acas_g7420	Acas_g7507	Acas_g772	Acas_g8476	Acas_g8508	Acas_g8566	Acas_g8598	Acas_g8661	Acas_g9361	Acas_g9608	Acas_g9671 Aque_XP_003383199 Atha_AT1G09020	Atha_AT1G15330	Atha_AT1G69800	Atha_AT1G80090	Atha_AT3G48530 Awhi_Unigene20238_m13874	Awhi_Unigene20239_m13875	Awhi_Unigene20402_m14023	Awhi_Unigene34862_m21917 Cang_119895	Cang_128827	Cang_37042	Cang_53051 Cfra_0026T1	Cfra_0636T1	Cfra_2904T1
OG0000179 Acas_g10530	Acas_g10983	Acas_g13646	Acas_g14188	Acas_g1910	Acas_g339	Acas_g3435	Acas_g3631 Aque_XP_003384121	Aque_XP_003384927	Aque_XP_003390149	Aque_XP_003390170	Aque_XP_003391273	Aque_XP_003391522	Aque_XP_003392051 Atha_AT3G02280	Atha_AT3G24710	Atha_AT4G24520	Atha_AT4G30210 Awhi_Unigene16963_m10707	Awhi_Unigene28998_m17590	Awhi_Unigene34099_m21130	Awhi_Unigene35323_m22416 Cang_116630	Cang_117822	Cang_149765	Cang_155249 Cfra_1060T1	Cfra_2250T1	Cfra_4553T1	Cfra_6496T1	Cfra_7844T1 Clim_g1772	Clim_g2833	Clim_g404	Clim_g478 Cowc_CAOG_01148	Cowc_CAOG_05035	Cowc_CAOG_07021	Cowc_CAOG_07923	Cowc_CAOG_09219 Nk52_evm11s374	Nk52_evm19s252	Nk52_evm25s246	Nk52_evm59s210	Nk52_evm88s1737 Ddis_XP_628906	Ddis_XP_636921	Ddis_XP_637665	Ddis_XP_646400	Ddis_XP_647335 Dmel_FBpp0076337	Dmel_FBpp0078880	Dmel_FBpp0082740 Ehux_100426	Ehux_221860	Ehux_224317	Ehux_228907	Ehux_229939	Ehux_434852	Ehux_452377
OG0000180 Acas_g10876	Acas_g11740	Acas_g1289	Acas_g710 Aque_XP_003384295	Aque_XP_003385694	Aque_XP_003385695	Aque_XP_003385696	Aque_XP_003385697	Aque_XP_003385764	Aque_XP_003387728	Aque_XP_003388360 Atha_AT1G80350	Atha_AT2G27600	Atha_AT2G34560	Atha_AT2G45500	Atha_AT3G27120 Awhi_Unigene11890_m7698	Awhi_Unigene16626_m10341	Awhi_Unigene6877_m3855	Awhi_Unigene6878_m3857 Cang_121464	Cang_136324	Cang_28759	Cang_34942	Cang_37956 Cfra_4216T1	Cfra_4400T1	Cfra_6125T1	Cfra_7144T1	Cfra_8059T1	Cfra_8182T1 Clim_g1565	Clim_g2204	Clim_g3557	Clim_g5589 Cowc_CAOG_02653	Cowc_CAOG_05739	Cowc_CAOG_05996	Cowc_CAOG_06437 Nk52_evm11s598	Nk52_evm13s242	Nk52_evm18s1444	Nk52_evm5s148	Nk52_evm78s1992 Ddis_XP_637373	Ddis_XP_638572	Ddis_XP_647261 Dmel_FBpp0070511	Dmel_FBpp0074278	Dmel_FBpp0077290	Dmel_FBpp0078469	Dmel_FBpp0083918	Dmel_FBpp0289962 Ehux_315231	Ehux_41711	Ehux_447716	Ehux_62433	Ehux_63324	Ehux_67481	Ehux_76960 Falb_H696_02794T0
OG0000181 Acas_g13182	Acas_g167	Acas_g2331	Acas_g4482	Acas_g7668 Aque_XP_003385645	Aque_XP_003386473	Aque_XP_003387891	Aque_XP_003389697	Aque_XP_003389698	Aque_XP_003389903	Aque_XP_003390551	Aque_XP_003391758 Atha_AT1G51380	Atha_AT1G54270	Atha_AT1G72730	Atha_AT3G13920	Atha_AT3G19760	Atha_AT3G53110	Atha_AT4G09730 Awhi_Unigene17133_m10900	Awhi_Unigene18547_m12563	Awhi_Unigene8742_m5940 Cang_203077	Cang_35524	Cang_35680	Cang_370302	Cang_407885 Cfra_3208T1	Cfra_4306T1	Cfra_4697T1	Cfra_6176T1	Cfra_7232T1	Cfra_7899T1	Cfra_8121T1 Clim_g1970	Clim_g5827	Clim_g6769	Clim_g6919 Cowc_CAOG_01074	Cowc_CAOG_01609	Cowc_CAOG_02667	Cowc_CAOG_05129	Cowc_CAOG_07362 Nk52_evm16s123	Nk52_evm3s2531	Nk52_evm4s2531	Nk52_evm50s221	Nk52_evm5s2531	Nk52_evm9s554 Ddis_XP_640633	Ddis_XP_642653	Ddis_XP_645917	Ddis_XP_646270	Ddis_XP_646448 Dmel_FBpp0078806	Dmel_FBpp0081324	Dmel_FBpp0112438 Ehux_312754	Ehux_413872	Ehux_431737
OG0000182 Acas_g11275	Acas_g11276	Acas_g11684	Acas_g13394	Acas_g1845	Acas_g8671	Acas_g8983 Aque_XP_003383462 Atha_AT1G18460	Atha_AT1G73920	Atha_AT2G15230	Atha_AT5G14180 Awhi_Unigene13229_m8578	Awhi_Unigene16919_m10668	Awhi_Unigene17818_m11737	Awhi_Unigene17992_m11941	Awhi_Unigene18621_m12648	Awhi_Unigene18624_m12650	Awhi_Unigene26525_m16386	Awhi_Unigene35032_m22115 Cang_74036 Cfra_1458T1 Cowc_CAOG_04798	Cowc_CAOG_05206	Cowc_CAOG_06135	Cowc_CAOG_06974 Nk52_evm12s503	Nk52_evm14s2391	Nk52_evm19s2485	Nk52_evm27s239	Nk52_evm29s239	Nk52_evm31s239	Nk52_evm49s2039 Ddis_XP_642461	Ddis_XP_643308	Ddis_XP_644974	Ddis_XP_646921	Ddis_XP_646922	Ddis_XP_646929 Dmel_FBpp0077205	Dmel_FBpp0077854	Dmel_FBpp0079682	Dmel_FBpp0079683	Dmel_FBpp0079684	Dmel_FBpp0079688	Dmel_FBpp0079693	Dmel_FBpp0079712	Dmel_FBpp0079713	Dmel_FBpp0079720	Dmel_FBpp0082113	Dmel_FBpp0082115	Dmel_FBpp0082116	Dmel_FBpp0082239	Dmel_FBpp0084315	Dmel_FBpp0084316	Dmel_FBpp0086532	Dmel_FBpp0099523	Dmel_FBpp0110078	Dmel_FBpp0289157
OG0000183 Acas_g6240	Acas_g9017 Aque_XP_003383351	Aque_XP_003384932	Aque_XP_003385362	Aque_XP_003386265	Aque_XP_003389466 Atha_AT1G03920	Atha_AT1G30640	Atha_AT2G19400	Atha_AT2G20470	Atha_AT3G23310	Atha_AT4G14350	Atha_AT4G33080	Atha_AT5G09890 Awhi_Unigene12834_m8304	Awhi_Unigene18336_m12339	Awhi_Unigene28645_m17308	Awhi_Unigene28646_m17309	Awhi_Unigene35726_m22816	Awhi_Unigene35727_m22817	Awhi_Unigene6834_m3805	Awhi_Unigene8593_m5789 Cang_119616	Cang_124451	Cang_159691 Cfra_1777T1	Cfra_2155T1	Cfra_5018T1	Cfra_5918T1	Cfra_6655T1 Clim_g1481	Clim_g3956	Clim_g5663	Clim_g5998	Clim_g6727	Clim_g6790	Clim_g7000 Cowc_CAOG_00305	Cowc_CAOG_00316	Cowc_CAOG_00619	Cowc_CAOG_02802	Cowc_CAOG_03654	Cowc_CAOG_04705	Cowc_CAOG_05338	Cowc_CAOG_06515	Cowc_CAOG_07198	Cowc_CAOG_07230 Nk52_evm10s1810	Nk52_evm13s245	Nk52_evm19s2391	Nk52_evm24s1020	Nk52_evm29s2402	Nk52_evm43s1360	Nk52_evm94s217 Ddis_XP_636570	Ddis_XP_638411	Ddis_XP_642376	Ddis_XP_643264 Dmel_FBpp0072194
OG0000184 Aque_XP_003385761 Atha_AT1G02510	Atha_AT4G01840	Atha_AT4G18160	Atha_AT5G46360	Atha_AT5G46370	Atha_AT5G55630 Awhi_Unigene32346_m19803	Awhi_Unigene34356_m21389	Awhi_Unigene34748_m21803 Cfra_0318T1	Cfra_3115T1	Cfra_3526T1	Cfra_6746T1	Cfra_8283T1 Clim_g5591 Dmel_FBpp0072545	Dmel_FBpp0073260	Dmel_FBpp0073351	Dmel_FBpp0081523	Dmel_FBpp0083069	Dmel_FBpp0087579	Dmel_FBpp0087858	Dmel_FBpp0111557	Dmel_FBpp0289141	Dmel_FBpp0290868	Dmel_FBpp0290964 Ehux_206473	Ehux_208794	Ehux_213011	Ehux_235865	Ehux_246073	Ehux_253547	Ehux_368233	Ehux_444186 Hsap_ENSP00000263372	Hsap_ENSP00000282146	Hsap_ENSP00000302166	Hsap_ENSP00000306275	Hsap_ENSP00000310568	Hsap_ENSP00000327611	Hsap_ENSP00000334650	Hsap_ENSP00000344820	Hsap_ENSP00000352527	Hsap_ENSP00000355580	Hsap_ENSP00000361952	Hsap_ENSP00000362328	Hsap_ENSP00000391498	Hsap_ENSP00000394033	Hsap_ENSP00000438690	Hsap_ENSP00000444522 Mlei_ML017929a	Mlei_ML02337a	Mlei_ML03543a	Mlei_ML07603a	Mlei_ML08413a	Mlei_ML09739a	Mlei_ML10225a
OG0000185 Acas_g13284	Acas_g3075	Acas_g5479	Acas_g5730	Acas_g7156 Aque_XP_003385124	Aque_XP_003386734	Aque_XP_003388451 Atha_AT1G13610	Atha_AT1G32190	Atha_AT1G66900	Atha_AT2G24320	Atha_AT3G01690	Atha_AT3G30380	Atha_AT4G24760	Atha_AT4G31020	Atha_AT5G14390	Atha_AT5G20520	Atha_AT5G38220 Awhi_Unigene30031_m18510	Awhi_Unigene3727_m2782	Awhi_Unigene37884_m24588 Cang_117479	Cang_125501	Cang_127169	Cang_82467 Cfra_2530T1	Cfra_4455T1	Cfra_8004T1 Clim_g2779	Clim_g436	Clim_g5125 Cowc_CAOG_02721	Cowc_CAOG_06682 Nk52_evm17s232	Nk52_evm29s211	Nk52_evm2s823	Nk52_evm5s299 Ddis_XP_635345	Ddis_XP_636045 Dmel_FBpp0077328	Dmel_FBpp0085764	Dmel_FBpp0112956 Ehux_104580	Ehux_200267	Ehux_204314	Ehux_210304	Ehux_251088	Ehux_416957	Ehux_56518 Hsap_ENSP00000250974	Hsap_ENSP00000258884	Hsap_ENSP00000336693	Hsap_ENSP00000365063	Hsap_ENSP00000365725	Hsap_ENSP00000366240 Ihof_1338 Mlei_ML008720a	Mlei_ML09083a	Mlei_ML19679a	Mlei_ML21907a Mver_03915	Mver_07881	Mver_11018 Mvib_comp11199_c0_seq1_m14756	Mvib_comp11199_c0_seq2_m14758
OG0000186 Acas_g10932	Acas_g17026	Acas_g1877	Acas_g2531	Acas_g5395	Acas_g6709	Acas_g7588	Acas_g8612	Acas_g9043 Aque_XP_003386866	Aque_XP_003386923	Aque_XP_003387293	Aque_XP_003387672 Atha_AT3G03330	Atha_AT3G03350	Atha_AT3G47350	Atha_AT3G47360	Atha_AT4G10020	Atha_AT5G10050	Atha_AT5G50590	Atha_AT5G50600	Atha_AT5G50770	Atha_AT5G65205 Awhi_Unigene14149_m9059	Awhi_Unigene36123_m23280 Cang_43172 Cfra_4117T1	Cfra_5970T1	Cfra_6635T1 Clim_g3024	Clim_g4238	Clim_g5668	Clim_g6533 Cowc_CAOG_04335 Nk52_evm9s859 Ddis_XP_001134533	Ddis_XP_002649190	Ddis_XP_629499	Ddis_XP_635255	Ddis_XP_635256	Ddis_XP_635655	Ddis_XP_636259	Ddis_XP_636367	Ddis_XP_636371	Ddis_XP_636372	Ddis_XP_636661	Ddis_XP_637524	Ddis_XP_637526	Ddis_XP_637527	Ddis_XP_638644	Ddis_XP_638645	Ddis_XP_638696	Ddis_XP_638815	Ddis_XP_640078	Ddis_XP_640571	Ddis_XP_641549	Ddis_XP_641691	Ddis_XP_643454	Ddis_XP_644269
OG0000187 Aque_XP_003382750	Aque_XP_003385828	Aque_XP_003388189	Aque_XP_003388350	Aque_XP_003390853	Aque_XP_003391671 Atha_AT1G02520	Atha_AT1G02530	Atha_AT1G10680	Atha_AT1G27940	Atha_AT1G28010	Atha_AT2G36910	Atha_AT2G39480	Atha_AT2G47000	Atha_AT3G28345	Atha_AT3G28360	Atha_AT3G28380	Atha_AT3G28390	Atha_AT3G28415	Atha_AT3G28860	Atha_AT3G55320	Atha_AT3G62150	Atha_AT4G01820	Atha_AT4G01830	Atha_AT4G18050	Atha_AT4G25960	Atha_AT5G46540 Awhi_Unigene1338_m1196	Awhi_Unigene16634_m10351	Awhi_Unigene18213_m12200	Awhi_Unigene18214_m12203	Awhi_Unigene20018_m13675	Awhi_Unigene37721_m24455	Awhi_Unigene38219_m24830	Awhi_Unigene6692_m3714 Cang_129557	Cang_34903	Cang_47745	Cang_57616 Cfra_3938T1	Cfra_4039T1	Cfra_4527T1	Cfra_7501T1 Clim_g5625 Cowc_CAOG_00182	Cowc_CAOG_02955	Cowc_CAOG_03219 Nk52_evm24s225	Nk52_evm28s292	Nk52_evm6s2415	Nk52_evm6s321	Nk52_evm7s2284	Nk52_evm8s2284 Ddis_XP_629136	Ddis_XP_629966 Dmel_FBpp0076719	Dmel_FBpp0076720	Dmel_FBpp0086666	Dmel_FBpp0086914 Ehux_110965
OG0000188 Aque_XP_003382523 Atha_AT1G20270	Atha_AT2G17720	Atha_AT2G23096	Atha_AT2G43080	Atha_AT3G06300	Atha_AT3G28480	Atha_AT3G28490	Atha_AT4G25600	Atha_AT4G33910	Atha_AT4G35810	Atha_AT4G35820	Atha_AT5G18900	Atha_AT5G66060 Cfra_8450T1 Ddis_XP_643703 Dmel_FBpp0074870	Dmel_FBpp0074873	Dmel_FBpp0074877	Dmel_FBpp0085012	Dmel_FBpp0085015	Dmel_FBpp0085019	Dmel_FBpp0085029	Dmel_FBpp0085032	Dmel_FBpp0085033	Dmel_FBpp0085046	Dmel_FBpp0085047	Dmel_FBpp0085048	Dmel_FBpp0085050	Dmel_FBpp0085051	Dmel_FBpp0099996	Dmel_FBpp0110158	Dmel_FBpp0111465	Dmel_FBpp0289326	Dmel_FBpp0289328	Dmel_FBpp0289329	Dmel_FBpp0289601	Dmel_FBpp0289958	Dmel_FBpp0290184	Dmel_FBpp0290205	Dmel_FBpp0291683	Dmel_FBpp0291684 Ehux_101851	Ehux_103230	Ehux_116295	Ehux_119786	Ehux_205434	Ehux_209623	Ehux_218427	Ehux_222190	Ehux_229551	Ehux_235093	Ehux_236216	Ehux_239956	Ehux_249922
OG0000189 Acas_g11098	Acas_g2276	Acas_g714	Acas_g8524	Acas_g9892 Aque_XP_003386125	Aque_XP_003386534	Aque_XP_003387399	Aque_XP_003388246	Aque_XP_003390373 Atha_AT1G07745	Atha_AT2G28560	Atha_AT2G45280	Atha_AT3G22880	Atha_AT5G20850	Atha_AT5G57450 Awhi_Unigene13013_m8427	Awhi_Unigene19410_m13124	Awhi_Unigene34322_m21355 Cang_156559	Cang_236705	Cang_30401 Cfra_1911T1	Cfra_2949T1	Cfra_3301T1	Cfra_3871T1	Cfra_6207T1	Cfra_8175T1 Clim_g1283	Clim_g2551	Clim_g4719	Clim_g4756	Clim_g5114 Cowc_CAOG_01223	Cowc_CAOG_01607	Cowc_CAOG_01773	Cowc_CAOG_03087	Cowc_CAOG_05560	Cowc_CAOG_05813 Nk52_evm29s2531	Nk52_evm2s318	Nk52_evm39s1810	Nk52_evm39s292	Nk52_evm56s221	Nk52_evm82s1992 Ddis_XP_001134538	Ddis_XP_638535	Ddis_XP_638929	Ddis_XP_644422 Dmel_FBpp0082392	Dmel_FBpp0084486	Dmel_FBpp0084955	Dmel_FBpp0290742 Ehux_104759	Ehux_194578	Ehux_223738	Ehux_226145	Ehux_238228 Falb_H696_01984T0	Falb_H696_01985T0	Falb_H696_02689T0	Falb_H696_03686T0
OG0000190 Acas_g11386	Acas_g13332	Acas_g15996	Acas_g3215	Acas_g3313	Acas_g3938	Acas_g9621 Aque_XP_003384514	Aque_XP_003385467	Aque_XP_003389670 Awhi_Unigene12588_m8128	Awhi_Unigene13396_m8697	Awhi_Unigene14393_m9093	Awhi_Unigene14397_m9095	Awhi_Unigene17861_m11780	Awhi_Unigene19056_m12777	Awhi_Unigene26651_m16425	Awhi_Unigene29211_m17770	Awhi_Unigene36463_m23589	Awhi_Unigene37308_m24157	Awhi_Unigene37654_m24404	Awhi_Unigene38071_m24725	Awhi_Unigene41696_m26581	Awhi_Unigene7751_m4837	Awhi_Unigene8160_m5314	Awhi_Unigene8629_m5826 Cang_52200 Cfra_2979T1	Cfra_7022T1	Cfra_7893T1 Clim_g1900 Cowc_CAOG_03190	Cowc_CAOG_04952	Cowc_CAOG_06697	Cowc_CAOG_08514 Nk52_evm16s2209	Nk52_evm1s2504	Nk52_evm2s2085 Ddis_XP_637630	Ddis_XP_637867	Ddis_XP_640140	Ddis_XP_645034	Ddis_XP_645926	Ddis_XP_647807 Dmel_FBpp0074124	Dmel_FBpp0083666	Dmel_FBpp0084919	Dmel_FBpp0289455	Dmel_FBpp0290365 Falb_H696_03456T0 Hsap_ENSP00000206262	Hsap_ENSP00000235382	Hsap_ENSP00000258302	Hsap_ENSP00000259406	Hsap_ENSP00000262320	Hsap_ENSP00000262406	Hsap_ENSP00000297313	Hsap_ENSP00000302625	Hsap_ENSP00000333194	Hsap_ENSP00000339381	Hsap_ENSP00000356429
OG0000191 Acas_g13392	Acas_g13834	Acas_g15137	Acas_g16400	Acas_g16474	Acas_g16480	Acas_g17676	Acas_g17945	Acas_g8969 Aque_XP_003382679	Aque_XP_003383485	Aque_XP_003384028	Aque_XP_003384879	Aque_XP_003384991	Aque_XP_003386591	Aque_XP_003387155	Aque_XP_003390834	Aque_XP_003391199 Awhi_Unigene13115_m8498	Awhi_Unigene19334_m13045	Awhi_Unigene35263_m22351	Awhi_Unigene6947_m3932 Cfra_6028T1	Cfra_7088T1 Clim_g1567	Clim_g5664 Cowc_CAOG_04510	Cowc_CAOG_04826 Nk52_evm14s1607	Nk52_evm22s355	Nk52_evm4s470 Ddis_XP_629509 Dmel_FBpp0078336 Ehux_100055	Ehux_225477	Ehux_248526	Ehux_421760 Falb_H696_01395T0 Hsap_ENSP00000349029	Hsap_ENSP00000363435	Hsap_ENSP00000370744 Ihof_3469 Mlei_ML00401a	Mlei_ML07011a	Mlei_ML07014a	Mlei_ML25824a	Mlei_ML368912a	Mlei_ML368916a Mvib_comp11877_c0_seq1_m17114	Mvib_comp11877_c1_seq1_m17119	Mvib_comp13185_c0_seq1_m22353	Mvib_comp13185_c1_seq1_m22357	Mvib_comp13185_c2_seq1_m22360	Mvib_comp13185_c3_seq1_m22363	Mvib_comp13185_c7_seq1_m22368	Mvib_comp15004_c1_seq1_m31957	Mvib_comp15004_c2_seq1_m31961	Mvib_comp15004_c4_seq1_m31972	Mvib_comp15004_c6_seq1_m31978	Mvib_comp15464_c0_seq1_m35380	Mvib_comp15464_c1_seq1_m35382	Mvib_comp15464_c2_seq1_m35385	Mvib_comp15464_c2_seq2_m35390	Mvib_comp15898_c0_seq1_m40681
OG0000192 Acas_g10213	Acas_g12636	Acas_g493	Acas_g5460	Acas_g5529 Aque_XP_003382961	Aque_XP_003385512	Aque_XP_003387377	Aque_XP_003387729	Aque_XP_003389645 Atha_AT1G20920	Atha_AT1G31970	Atha_AT1G55150	Atha_AT2G47330	Atha_AT3G01540	Atha_AT3G06480	Atha_AT3G09620	Atha_AT5G14610	Atha_AT5G63120 Awhi_Unigene16756_m10495	Awhi_Unigene18145_m12126	Awhi_Unigene2100_m1475	Awhi_Unigene35625_m22720	Awhi_Unigene9042_m6316 Cang_119321	Cang_132925	Cang_29786	Cang_35841 Cfra_0522T1	Cfra_2341T1	Cfra_4084T1	Cfra_4297T1	Cfra_8304T1 Clim_g198	Clim_g6937 Cowc_CAOG_00776	Cowc_CAOG_01827	Cowc_CAOG_05283	Cowc_CAOG_08856 Nk52_evm28s1178	Nk52_evm2s388	Nk52_evm34s248	Nk52_evm5s278 Ddis_XP_629279	Ddis_XP_629301	Ddis_XP_636700	Ddis_XP_640502	Ddis_XP_643509 Dmel_FBpp0071084	Dmel_FBpp0073828	Dmel_FBpp0076003	Dmel_FBpp0076649	Dmel_FBpp0078301	Dmel_FBpp0112117 Ehux_199049	Ehux_252205	Ehux_311127	Ehux_418728	Ehux_428126	Ehux_429118	Ehux_455206
OG0000193 Acas_g11970	Acas_g14170	Acas_g14600	Acas_g15340	Acas_g15821	Acas_g2282	Acas_g8173	Acas_g9243 Aque_XP_003388842	Aque_XP_003388852 Atha_AT1G02300	Atha_AT1G02305	Atha_AT4G01610 Awhi_Unigene10992_m7307	Awhi_Unigene16874_m10620	Awhi_Unigene17088_m10840	Awhi_Unigene17120_m10882	Awhi_Unigene34975_m22052	Awhi_Unigene35254_m22344	Awhi_Unigene8199_m5354 Cfra_2262T1	Cfra_3763T1	Cfra_3918T1	Cfra_6075T1 Clim_g3588 Cowc_CAOG_01946	Cowc_CAOG_05925	Cowc_CAOG_08160 Nk52_evm11s282	Nk52_evm1s1639	Nk52_evm1s2113	Nk52_evm1s2582	Nk52_evm1s494	Nk52_evm21s223	Nk52_evm30s266 Ddis_XP_629634	Ddis_XP_636643	Ddis_XP_636852	Ddis_XP_637893	Ddis_XP_638805	Ddis_XP_643261 Dmel_FBpp0071697	Dmel_FBpp0073669	Dmel_FBpp0086772 Ehux_355058 Hsap_ENSP00000227266	Hsap_ENSP00000259782	Hsap_ENSP00000271064	Hsap_ENSP00000342070 Ihof_2513	Ihof_4097	Ihof_4098	Ihof_7171	Ihof_8397 Mlei_ML00328a	Mlei_ML009138a	Mlei_ML03248a	Mlei_ML033412a	Mlei_ML05253a	Mlei_ML075220a	Mlei_ML078013a	Mlei_ML07925a	Mlei_ML09068a
OG0000194 Nk52_evm97s224 Dmel_FBpp0070262 Hsap_ENSP00000255030	Hsap_ENSP00000255040	Hsap_ENSP00000265634	Hsap_ENSP00000295927	Hsap_ENSP00000307549	Hsap_ENSP00000327545	Hsap_ENSP00000445277 Mlei_ML003221a	Mlei_ML005717a	Mlei_ML00644a	Mlei_ML01057a	Mlei_ML01316a	Mlei_ML02594a	Mlei_ML028014a	Mlei_ML03062a	Mlei_ML03446a	Mlei_ML04388a	Mlei_ML04637a	Mlei_ML05697a	Mlei_ML06172a	Mlei_ML06581a	Mlei_ML073248a	Mlei_ML074243a	Mlei_ML078926a	Mlei_ML08033a	Mlei_ML08135a	Mlei_ML094317a	Mlei_ML12324a	Mlei_ML124915a	Mlei_ML129318a	Mlei_ML13181a	Mlei_ML13703a	Mlei_ML141730a	Mlei_ML15196a	Mlei_ML15511a	Mlei_ML15512a	Mlei_ML16271a	Mlei_ML181010a	Mlei_ML205715a	Mlei_ML216916a	Mlei_ML22522a	Mlei_ML24142a	Mlei_ML258259a	Mlei_ML310318a	Mlei_ML32996a	Mlei_ML34635a	Mlei_ML38171a	Mlei_ML409411a	Mlei_ML444214a	Mlei_ML451323a Mvib_comp10818_c1_seq1_m13501	Mvib_comp11658_c2_seq1_m16409
OG0000195 Dmel_FBpp0070550	Dmel_FBpp0088996	Dmel_FBpp0088997 Hsap_ENSP00000171757	Hsap_ENSP00000216629	Hsap_ENSP00000234961	Hsap_ENSP00000238699	Hsap_ENSP00000246657	Hsap_ENSP00000248076	Hsap_ENSP00000249016	Hsap_ENSP00000249041	Hsap_ENSP00000249887	Hsap_ENSP00000255008	Hsap_ENSP00000257254	Hsap_ENSP00000260843	Hsap_ENSP00000265572	Hsap_ENSP00000267377	Hsap_ENSP00000267549	Hsap_ENSP00000272644	Hsap_ENSP00000272928	Hsap_ENSP00000273145	Hsap_ENSP00000273430	Hsap_ENSP00000276077	Hsap_ENSP00000281806	Hsap_ENSP00000282018	Hsap_ENSP00000292174	Hsap_ENSP00000292301	Hsap_ENSP00000292303	Hsap_ENSP00000293897	Hsap_ENSP00000295683	Hsap_ENSP00000296140	Hsap_ENSP00000296641	Hsap_ENSP00000296677	Hsap_ENSP00000298440	Hsap_ENSP00000299727	Hsap_ENSP00000301974	Hsap_ENSP00000304414	Hsap_ENSP00000304767	Hsap_ENSP00000307259	Hsap_ENSP00000307713	Hsap_ENSP00000308361	Hsap_ENSP00000308479	Hsap_ENSP00000309771	Hsap_ENSP00000310305	Hsap_ENSP00000310405	Hsap_ENSP00000311733	Hsap_ENSP00000319635	Hsap_ENSP00000319744	Hsap_ENSP00000320376	Hsap_ENSP00000321326	Hsap_ENSP00000326432
OG0000196 Acas_g13359	Acas_g60	Acas_g8670	Acas_g9656 Aque_XP_003383523	Aque_XP_003385405	Aque_XP_003386975	Aque_XP_003389728	Aque_XP_003390649	Aque_XP_003391505	Aque_XP_003391876 Atha_AT1G08350	Atha_AT1G10950	Atha_AT1G14670	Atha_AT1G55130	Atha_AT2G01970	Atha_AT2G24170	Atha_AT3G13772	Atha_AT4G12650	Atha_AT5G10840	Atha_AT5G25100	Atha_AT5G35160	Atha_AT5G37310 Awhi_Unigene18120_m12096	Awhi_Unigene19754_m13438	Awhi_Unigene20918_m14502	Awhi_Unigene6936_m3917 Cang_59430 Cfra_1942T1	Cfra_2551T1	Cfra_2568T1	Cfra_4868T1	Cfra_8190T1 Clim_g3277	Clim_g4805	Clim_g5279	Clim_g5602 Cowc_CAOG_01530	Cowc_CAOG_02863	Cowc_CAOG_04425	Cowc_CAOG_05345	Cowc_CAOG_06252 Nk52_evm117s352	Nk52_evm20s304	Nk52_evm31s288	Nk52_evm41s2531 Ddis_XP_635866	Ddis_XP_642756	Ddis_XP_642757	Ddis_XP_647493 Dmel_FBpp0076833	Dmel_FBpp0080109	Dmel_FBpp0080923 Ehux_123772	Ehux_196296	Ehux_360511	Ehux_416312	Ehux_418672	Ehux_423478	Ehux_430018	Ehux_46235
OG0000197 Acas_g10577	Acas_g10588	Acas_g11741	Acas_g11754	Acas_g11962	Acas_g12250	Acas_g12628	Acas_g12697	Acas_g12923	Acas_g13350	Acas_g1968	Acas_g2915	Acas_g3731	Acas_g4262	Acas_g4445	Acas_g4446	Acas_g4673	Acas_g4682	Acas_g5215	Acas_g7381	Acas_g739	Acas_g7715	Acas_g8075	Acas_g8187	Acas_g8556	Acas_g9638	Acas_g9773	Acas_g9790	Acas_g9791	Acas_g9792	Acas_g9968 Atha_AT1G08000	Atha_AT1G08010	Atha_AT1G51600	Atha_AT2G18380	Atha_AT2G28340	Atha_AT2G45050	Atha_AT3G06740	Atha_AT3G16870	Atha_AT3G20750	Atha_AT3G21175	Atha_AT3G24050	Atha_AT3G45170	Atha_AT3G50870	Atha_AT3G51080	Atha_AT3G54810	Atha_AT3G60530	Atha_AT4G16141	Atha_AT4G24470	Atha_AT4G26150	Atha_AT4G32890
OG0000198 Acas_g11104	Acas_g11618	Acas_g12747	Acas_g4826	Acas_g6056	Acas_g6203	Acas_g6776	Acas_g9426 Aque_XP_003386695	Aque_XP_003387304	Aque_XP_003387499 Atha_AT1G04750	Atha_AT1G04760	Atha_AT2G25340	Atha_AT2G32670	Atha_AT2G33110	Atha_AT2G33120	Atha_AT3G24890	Atha_AT3G54300	Atha_AT4G15780	Atha_AT4G32150	Atha_AT5G11150	Atha_AT5G22360 Awhi_Unigene19074_m12791	Awhi_Unigene19075_m12792	Awhi_Unigene32567_m20001	Awhi_Unigene34310_m21342	Awhi_Unigene34311_m21343	Awhi_Unigene7303_m4355 Cang_109030	Cang_49933	Cang_55943	Cang_56646	Cang_57386	Cang_57587	Cang_71841 Cfra_0862T1	Cfra_0884T1	Cfra_3121T1	Cfra_5024T1	Cfra_6973T1 Clim_g1892	Clim_g3168	Clim_g4956	Clim_g730 Cowc_CAOG_06150	Cowc_CAOG_07836 Nk52_evm2s207	Nk52_evm57s226 Ddis_XP_635770	Ddis_XP_639950	Ddis_XP_641249	Ddis_XP_642704 Dmel_FBpp0088416	Dmel_FBpp0089251	Dmel_FBpp0271782 Ehux_204678	Ehux_219381	Ehux_226600	Ehux_316801	Ehux_351006
OG0000199 Acas_g10014	Acas_g11432	Acas_g17344	Acas_g372 Atha_AT1G19700	Atha_AT1G23380	Atha_AT1G62360	Atha_AT1G62990	Atha_AT1G70510	Atha_AT1G75410	Atha_AT1G75430	Atha_AT2G16400	Atha_AT2G23760	Atha_AT2G27220	Atha_AT2G27990	Atha_AT2G35940	Atha_AT4G08150	Atha_AT4G32040	Atha_AT4G32980	Atha_AT4G34610	Atha_AT4G36870	Atha_AT5G02030	Atha_AT5G11060	Atha_AT5G25220	Atha_AT5G41410 Awhi_Unigene35779_m22875 Cang_83039 Cfra_0717T1	Cfra_2245T1	Cfra_6765T1	Cfra_7141T1 Clim_g838 Cowc_CAOG_02804	Cowc_CAOG_05454	Cowc_CAOG_08013 Nk52_evm10s2010	Nk52_evm11s1837	Nk52_evm12s1837	Nk52_evm12s301	Nk52_evm13s301	Nk52_evm1s222	Nk52_evm23s266	Nk52_evm2s1837	Nk52_evm32s238	Nk52_evm35s279	Nk52_evm3s1837	Nk52_evm4s1837	Nk52_evm5s1837	Nk52_evm6s1837	Nk52_evm6s62	Nk52_evm9s1837 Ddis_XP_002649128	Ddis_XP_635379	Ddis_XP_637648	Ddis_XP_641195	Ddis_XP_644890 Dmel_FBpp0073940	Dmel_FBpp0075640	Dmel_FBpp0075641
OG0000200 Acas_g10329	Acas_g15114	Acas_g2044	Acas_g3179	Acas_g3445 Aque_XP_003388061	Aque_XP_003388253 Atha_AT1G55350 Awhi_Unigene3026_m2201	Awhi_Unigene3026_m2202	Awhi_Unigene37428_m24243	Awhi_Unigene37953_m24638	Awhi_Unigene37954_m24639 Clim_g2541	Clim_g6143 Cowc_CAOG_06245 Nk52_evm2s326	Nk52_evm34s2309 Ddis_XP_646763 Dmel_FBpp0074005	Dmel_FBpp0076072	Dmel_FBpp0085714	Dmel_FBpp0088620 Ehux_101205	Ehux_194523	Ehux_204365	Ehux_204520	Ehux_204548	Ehux_209933	Ehux_211883	Ehux_211884	Ehux_212097	Ehux_226821	Ehux_230012	Ehux_236382	Ehux_369600	Ehux_427647	Ehux_454604	Ehux_458777	Ehux_458780	Ehux_468751	Ehux_95406	Ehux_96457 Hsap_ENSP00000219611	Hsap_ENSP00000271971	Hsap_ENSP00000279247	Hsap_ENSP00000295055	Hsap_ENSP00000317214	Hsap_ENSP00000331636	Hsap_ENSP00000354087	Hsap_ENSP00000355834	Hsap_ENSP00000355837	Hsap_ENSP00000375844	Hsap_ENSP00000380349	Hsap_ENSP00000381758	Hsap_ENSP00000385247 Mlei_ML022412a	Mlei_ML02392a	Mlei_ML02826a	Mlei_ML058010a	Mlei_ML070242a
OG0000201 Acas_g10587	Acas_g12317	Acas_g12496	Acas_g7909	Acas_g8627	Acas_g9374 Atha_AT1G47710	Atha_AT1G51330	Atha_AT1G62160	Atha_AT1G62170	Atha_AT1G63280	Atha_AT1G64010	Atha_AT1G64030	Atha_AT2G14540	Atha_AT2G25240	Atha_AT2G26390	Atha_AT2G35580	Atha_AT3G45220 Nk52_evm1s2134	Nk52_evm51s223	Nk52_evm52s223 Dmel_FBpp0074610	Dmel_FBpp0074612	Dmel_FBpp0077830	Dmel_FBpp0078950	Dmel_FBpp0079094	Dmel_FBpp0079171	Dmel_FBpp0079179	Dmel_FBpp0079243	Dmel_FBpp0079528	Dmel_FBpp0080979	Dmel_FBpp0082594	Dmel_FBpp0082595	Dmel_FBpp0085495	Dmel_FBpp0085496	Dmel_FBpp0085497	Dmel_FBpp0085523	Dmel_FBpp0085912	Dmel_FBpp0087306	Dmel_FBpp0088112	Dmel_FBpp0088123	Dmel_FBpp0088124	Dmel_FBpp0088125	Dmel_FBpp0110074	Dmel_FBpp0110138	Dmel_FBpp0289587 Ehux_120202	Ehux_202735 Hsap_ENSP00000215727	Hsap_ENSP00000223095	Hsap_ENSP00000238508	Hsap_ENSP00000261994	Hsap_ENSP00000264677	Hsap_ENSP00000283752	Hsap_ENSP00000295777
OG0000202 Cfra_7252T1 Dmel_FBpp0073155	Dmel_FBpp0077724	Dmel_FBpp0079502	Dmel_FBpp0084003	Dmel_FBpp0084023	Dmel_FBpp0084061	Dmel_FBpp0089367	Dmel_FBpp0288426	Dmel_FBpp0289395	Dmel_FBpp0291049 Ehux_102976	Ehux_211329	Ehux_221874	Ehux_224307	Ehux_224308	Ehux_448130	Ehux_465047	Ehux_99941 Hsap_ENSP00000250699	Hsap_ENSP00000258385	Hsap_ENSP00000260191	Hsap_ENSP00000261007	Hsap_ENSP00000261751	Hsap_ENSP00000276410	Hsap_ENSP00000289957	Hsap_ENSP00000293780	Hsap_ENSP00000299565	Hsap_ENSP00000299847	Hsap_ENSP00000304290	Hsap_ENSP00000312663	Hsap_ENSP00000315602	Hsap_ENSP00000322617	Hsap_ENSP00000347754	Hsap_ENSP00000357461	Hsap_ENSP00000359285	Hsap_ENSP00000371929	Hsap_ENSP00000374145	Hsap_ENSP00000385026	Hsap_ENSP00000406050	Hsap_ENSP00000407546 Nvec_XP_001622431	Nvec_XP_001624152	Nvec_XP_001624153	Nvec_XP_001625846	Nvec_XP_001626826	Nvec_XP_001628236	Nvec_XP_001629487	Nvec_XP_001629488	Nvec_XP_001630785	Nvec_XP_001630815	Nvec_XP_001631037	Nvec_XP_001631598	Nvec_XP_001631599
OG0000203 Acas_g14011	Acas_g2302	Acas_g6220 Aque_XP_003383439	Aque_XP_003386476	Aque_XP_003386990	Aque_XP_003388799 Atha_AT1G29770	Atha_AT1G29780	Atha_AT1G55900	Atha_AT3G55960	Atha_AT4G18140	Atha_AT5G11860	Atha_AT5G45700	Atha_AT5G46410 Awhi_Unigene17625_m11489	Awhi_Unigene28114_m16828 Cang_103824	Cang_104468	Cang_120341	Cang_127889	Cang_23205	Cang_322729	Cang_339160	Cang_36013	Cang_365030	Cang_47758	Cang_69923 Cfra_0070T1	Cfra_3530T1 Clim_g2955	Clim_g5488	Clim_g6895 Cowc_CAOG_03127	Cowc_CAOG_04415	Cowc_CAOG_07628 Nk52_evm15s805	Nk52_evm25s293	Nk52_evm29s262	Nk52_evm33s554 Ddis_XP_628708	Ddis_XP_635771	Ddis_XP_637875	Ddis_XP_637876 Dmel_FBpp0070474	Dmel_FBpp0072407	Dmel_FBpp0072954	Dmel_FBpp0075276	Dmel_FBpp0076921	Dmel_FBpp0085289	Dmel_FBpp0087803 Ehux_210979	Ehux_436342	Ehux_58730 Falb_H696_02734T0	Falb_H696_04025T0	Falb_H696_04103T0	Falb_H696_04509T0	Falb_H696_05815T0 Hsap_ENSP00000260327	Hsap_ENSP00000273179	Hsap_ENSP00000318115	Hsap_ENSP00000321732
OG0000204 Acas_g12267	Acas_g13706	Acas_g1423	Acas_g14515	Acas_g14516	Acas_g2031	Acas_g3795	Acas_g5278	Acas_g7513	Acas_g9529 Aque_XP_003383437	Aque_XP_003384809	Aque_XP_003384840	Aque_XP_003387643 Atha_AT1G07930	Atha_AT1G18070	Atha_AT5G10630 Awhi_Unigene17981_m11920	Awhi_Unigene17982_m11923	Awhi_Unigene18445_m12460	Awhi_Unigene22957_m15277	Awhi_Unigene32977_m20380	Awhi_Unigene35958_m23059 Cang_128775	Cang_34708	Cang_39876	Cang_40544	Cang_43965	Cang_62347 Cfra_1811T1	Cfra_5425T1	Cfra_8354T1 Clim_g3853	Clim_g3927	Clim_g3987 Cowc_CAOG_07807	Cowc_CAOG_08140	Cowc_CAOG_08779	Cowc_CAOG_08980 Nk52_evm22s281	Nk52_evm2s232	Nk52_evm38s359	Nk52_evm5s1444 Ddis_XP_638881	Ddis_XP_642353	Ddis_XP_645978 Dmel_FBpp0072745	Dmel_FBpp0079951	Dmel_FBpp0085193	Dmel_FBpp0087142 Ehux_230439	Ehux_419452	Ehux_428552	Ehux_462457	Ehux_78778 Falb_H696_01775T0	Falb_H696_02364T0	Falb_H696_06294T0	Falb_H696_06294T1 Hsap_ENSP00000217182	Hsap_ENSP00000330054	Hsap_ENSP00000341247	Hsap_ENSP00000356811
OG0000205 Acas_g1006	Acas_g2691	Acas_g2950	Acas_g429	Acas_g6390	Acas_g8546 Aque_XP_003387250	Aque_XP_003388651 Atha_AT3G06460	Atha_AT3G06470	Atha_AT4G36830 Awhi_Unigene1020_m976	Awhi_Unigene16501_m10210	Awhi_Unigene16720_m10463	Awhi_Unigene17190_m10961	Awhi_Unigene18560_m12578	Awhi_Unigene28510_m17176	Awhi_Unigene36465_m23592 Cang_116679	Cang_120305	Cang_121456 Cfra_4852T1	Cfra_5992T1	Cfra_6469T1	Cfra_8614T1 Clim_g3387	Clim_g4827	Clim_g486 Cowc_CAOG_03987	Cowc_CAOG_05364	Cowc_CAOG_07538 Nk52_evm10s276	Nk52_evm17s153	Nk52_evm1s1930	Nk52_evm53s2152 Ddis_XP_002649204	Ddis_XP_629422	Ddis_XP_640460	Ddis_XP_642582	Ddis_XP_644121	Ddis_XP_645380	Ddis_XP_646697 Dmel_FBpp0075961	Dmel_FBpp0078575	Dmel_FBpp0078579	Dmel_FBpp0081313	Dmel_FBpp0081621	Dmel_FBpp0081622	Dmel_FBpp0081630	Dmel_FBpp0081631	Dmel_FBpp0081632	Dmel_FBpp0083654	Dmel_FBpp0083657	Dmel_FBpp0083674	Dmel_FBpp0083678	Dmel_FBpp0083731	Dmel_FBpp0083878	Dmel_FBpp0085824	Dmel_FBpp0085825	Dmel_FBpp0087468
OG0000206 Acas_g2135 Aque_XP_003387261	Aque_XP_003387463	Aque_XP_003387464 Atha_AT2G29650	Atha_AT2G38060	Atha_AT3G46980	Atha_AT4G00370	Atha_AT5G20380	Atha_AT5G44370 Awhi_Unigene39599_m25346 Clim_g6525 Cowc_CAOG_01813	Cowc_CAOG_02811 Ddis_XP_641013	Ddis_XP_641413 Dmel_FBpp0070683	Dmel_FBpp0071801	Dmel_FBpp0071802	Dmel_FBpp0071804	Dmel_FBpp0071806	Dmel_FBpp0071807	Dmel_FBpp0073555	Dmel_FBpp0077083	Dmel_FBpp0077146	Dmel_FBpp0077449	Dmel_FBpp0077623	Dmel_FBpp0079876	Dmel_FBpp0080090	Dmel_FBpp0083296	Dmel_FBpp0085229	Dmel_FBpp0085369	Dmel_FBpp0085628	Dmel_FBpp0085814	Dmel_FBpp0085816	Dmel_FBpp0085818	Dmel_FBpp0086261	Dmel_FBpp0086593	Dmel_FBpp0087925	Dmel_FBpp0288424	Dmel_FBpp0289506	Dmel_FBpp0290993	Dmel_FBpp0291857 Ehux_101959	Ehux_109501	Ehux_123931	Ehux_125142	Ehux_240437	Ehux_254804	Ehux_448586	Ehux_455309	Ehux_61619	Ehux_65966	Ehux_95194 Hsap_ENSP00000221485	Hsap_ENSP00000244527	Hsap_ENSP00000263160	Hsap_ENSP00000316909	Hsap_ENSP00000348019
OG0000207 Aque_XP_003385907	Aque_XP_003385908	Aque_XP_003385909	Aque_XP_003385910	Aque_XP_003385911	Aque_XP_003385912	Aque_XP_003386730	Aque_XP_003387246	Aque_XP_003388055	Aque_XP_003389484	Aque_XP_003390333	Aque_XP_003391520 Awhi_Unigene15807_m9861	Awhi_Unigene31438_m18885	Awhi_Unigene41060_m26233	Awhi_Unigene41332_m26386	Awhi_Unigene76_m75 Cang_156172	Cang_404127	Cang_41603	Cang_44098 Cowc_CAOG_07242	Cowc_CAOG_08495 Nk52_evm100s352	Nk52_evm1s1485	Nk52_evm8s369 Dmel_FBpp0088248	Dmel_FBpp0271833 Ehux_459284	Ehux_466586 Hsap_ENSP00000282753	Hsap_ENSP00000306138	Hsap_ENSP00000309493	Hsap_ENSP00000325675	Hsap_ENSP00000331867	Hsap_ENSP00000344173	Hsap_ENSP00000344411	Hsap_ENSP00000355316	Hsap_ENSP00000363296	Hsap_ENSP00000364520	Hsap_ENSP00000378492	Hsap_ENSP00000420194	Hsap_ENSP00000434573 Ihof_2321	Ihof_5657 Mlei_ML019237a	Mlei_ML02079a	Mlei_ML17995a	Mlei_ML223522a	Mlei_ML334215a Mver_08938 Nvec_XP_001618198	Nvec_XP_001618883	Nvec_XP_001618884	Nvec_XP_001623867	Nvec_XP_001625605	Nvec_XP_001625662	Nvec_XP_001627353	Nvec_XP_001630286	Nvec_XP_001630376	Nvec_XP_001630792
OG0000208 Acas_g10642	Acas_g4297	Acas_g5459	Acas_g8981	Acas_g976 Aque_XP_003382493	Aque_XP_003383655	Aque_XP_003383656	Aque_XP_003383657	Aque_XP_003385203 Atha_AT1G10430	Atha_AT1G50370	Atha_AT1G59830	Atha_AT1G69960	Atha_AT2G42500	Atha_AT3G19980	Atha_AT3G58500	Atha_AT4G26720	Atha_AT5G55260 Awhi_Unigene34247_m21288	Awhi_Unigene7087_m4126	Awhi_Unigene7438_m4504	Awhi_Unigene8378_m5547 Cang_40679	Cang_57101	Cang_57829	Cang_57943	Cang_60425 Cfra_0886T1	Cfra_2040T1	Cfra_4907T1	Cfra_5404T1 Clim_g1104	Clim_g3626	Clim_g5138 Cowc_CAOG_00053	Cowc_CAOG_01442	Cowc_CAOG_08096 Nk52_evm1s1382	Nk52_evm39s156	Nk52_evm5s218 Ddis_XP_635791	Ddis_XP_639209	Ddis_XP_645186	Ddis_XP_645278 Dmel_FBpp0070883	Dmel_FBpp0077016	Dmel_FBpp0079148 Ehux_415666	Ehux_423224	Ehux_428593	Ehux_439078	Ehux_445372 Falb_H696_03844T0	Falb_H696_04008T0	Falb_H696_05332T0	Falb_H696_06027T0 Hsap_ENSP00000221138	Hsap_ENSP00000279387	Hsap_ENSP00000392147	Hsap_ENSP00000418447 Ihof_1740	Ihof_2531	Ihof_2904
OG0000209 Acas_g11465	Acas_g11522	Acas_g12067	Acas_g2629	Acas_g6600	Acas_g6603 Aque_XP_003382469	Aque_XP_003388164 Atha_AT1G67340	Atha_AT5G50450 Awhi_Unigene10038_m6906	Awhi_Unigene13795_m8970	Awhi_Unigene15399_m9639	Awhi_Unigene16378_m10080	Awhi_Unigene19689_m13379	Awhi_Unigene23833_m15619	Awhi_Unigene2494_m1780	Awhi_Unigene29342_m17876	Awhi_Unigene29343_m17878	Awhi_Unigene31618_m19054	Awhi_Unigene32429_m19884	Awhi_Unigene32872_m20284	Awhi_Unigene33067_m20465	Awhi_Unigene39373_m25200	Awhi_Unigene39389_m25210	Awhi_Unigene8652_m5851	Awhi_Unigene8653_m5852 Cfra_6985T1 Clim_g1497	Clim_g2295 Cowc_CAOG_05217 Nk52_evm10s1485	Nk52_evm1s1004	Nk52_evm21s2367	Nk52_evm30s2579	Nk52_evm32s153	Nk52_evm33s356	Nk52_evm91s62 Ddis_XP_640363	Ddis_XP_642738	Ddis_XP_647677 Dmel_FBpp0075989	Dmel_FBpp0082339 Ehux_105797	Ehux_111484	Ehux_117124	Ehux_195465	Ehux_197873	Ehux_198900	Ehux_201631	Ehux_210760	Ehux_227045	Ehux_233650	Ehux_238443	Ehux_244285	Ehux_249219	Ehux_250616	Ehux_254328	Ehux_258390	Ehux_365014
OG0000210 Acas_g10088	Acas_g10875	Acas_g3099	Acas_g3271	Acas_g7649 Aque_XP_003382495	Aque_XP_003384453	Aque_XP_003384594 Atha_AT1G64230	Atha_AT2G16740	Atha_AT3G08690	Atha_AT3G08700	Atha_AT3G13550	Atha_AT3G24515	Atha_AT4G27960	Atha_AT5G41700	Atha_AT5G50870	Atha_AT5G53300	Atha_AT5G56150 Awhi_Unigene14344_m9077	Awhi_Unigene18046_m12003	Awhi_Unigene18277_m12272	Awhi_Unigene31684_m19132	Awhi_Unigene35504_m22603	Awhi_Unigene35505_m22604 Cang_34159	Cang_66429 Cfra_1401T1	Cfra_1639T1	Cfra_1982T1	Cfra_5519T1	Cfra_8299T1 Clim_g3091	Clim_g4103	Clim_g6803 Cowc_CAOG_00194	Cowc_CAOG_04214	Cowc_CAOG_06883	Cowc_CAOG_08446 Nk52_evm17s159	Nk52_evm1s1073	Nk52_evm48s158	Nk52_evm7s224 Ddis_XP_635346	Ddis_XP_635643	Ddis_XP_639901	Ddis_XP_640448 Dmel_FBpp0076124	Dmel_FBpp0077589	Dmel_FBpp0079704	Dmel_FBpp0082477 Ehux_429671	Ehux_444197	Ehux_458065	Ehux_47260 Falb_H696_00178T0 Hsap_ENSP00000222402	Hsap_ENSP00000261427	Hsap_ENSP00000303709	Hsap_ENSP00000349722	Hsap_ENSP00000356243	Hsap_ENSP00000363019	Hsap_ENSP00000376215
OG0000211 Acas_g10614 Aque_XP_003388575	Aque_XP_003388576	Aque_XP_003388798	Aque_XP_003388984	Aque_XP_003390539	Aque_XP_003391657 Awhi_Unigene28942_m17545	Awhi_Unigene31810_m19260	Awhi_Unigene7546_m4616 Cang_132405	Cang_134711	Cang_242298	Cang_259088	Cang_55405	Cang_59492 Cfra_7004T1 Clim_g5912 Cowc_CAOG_03458	Cowc_CAOG_07524 Nk52_evm12s1569	Nk52_evm1s405	Nk52_evm22s62	Nk52_evm24s287	Nk52_evm2s128	Nk52_evm2s283	Nk52_evm56s208	Nk52_evm63s2192	Nk52_evm6s7 Dmel_FBpp0084826	Dmel_FBpp0084917	Dmel_FBpp0111799	Dmel_FBpp0288810	Dmel_FBpp0290713 Falb_H696_01691T0 Hsap_ENSP00000200557	Hsap_ENSP00000256389	Hsap_ENSP00000256412	Hsap_ENSP00000260408	Hsap_ENSP00000264377	Hsap_ENSP00000265707	Hsap_ENSP00000265708	Hsap_ENSP00000265727	Hsap_ENSP00000265769	Hsap_ENSP00000267499	Hsap_ENSP00000309968	Hsap_ENSP00000348912	Hsap_ENSP00000349436	Hsap_ENSP00000352177	Hsap_ENSP00000357668	Hsap_ENSP00000358407	Hsap_ENSP00000369238	Hsap_ENSP00000370166	Hsap_ENSP00000419446	Hsap_ENSP00000428654 Ihof_3359	Ihof_4179	Ihof_4474	Ihof_9671 Mlei_ML010117a	Mlei_ML021121a	Mlei_ML02305a
OG0000212 Acas_g1261	Acas_g5766	Acas_g8189 Aque_XP_003383417	Aque_XP_003386623	Aque_XP_003388987 Atha_AT1G08065	Atha_AT1G08080	Atha_AT2G28210	Atha_AT3G52720	Atha_AT4G20990	Atha_AT4G21000	Atha_AT5G04180	Atha_AT5G56330 Awhi_Unigene17168_m10940	Awhi_Unigene27511_m16686	Awhi_Unigene28755_m17406 Cang_254719	Cang_254726	Cang_254751	Cang_31624	Cang_44461	Cang_61837 Cfra_4125T1	Cfra_7156T1 Clim_g5619 Cowc_CAOG_00017 Nk52_evm1s1956	Nk52_evm33s239 Dmel_FBpp0071167	Dmel_FBpp0071321	Dmel_FBpp0071443	Dmel_FBpp0071446	Dmel_FBpp0075733	Dmel_FBpp0080116	Dmel_FBpp0081657	Dmel_FBpp0083628	Dmel_FBpp0084107	Dmel_FBpp0084503	Dmel_FBpp0085124	Dmel_FBpp0087310	Dmel_FBpp0112225	Dmel_FBpp0112242	Dmel_FBpp0289296 Ehux_233460	Ehux_437452	Ehux_456048	Ehux_62679 Hsap_ENSP00000084798	Hsap_ENSP00000178638	Hsap_ENSP00000256119	Hsap_ENSP00000285379	Hsap_ENSP00000285381	Hsap_ENSP00000300900	Hsap_ENSP00000309649	Hsap_ENSP00000314099	Hsap_ENSP00000314407	Hsap_ENSP00000318912	Hsap_ENSP00000340363	Hsap_ENSP00000345659	Hsap_ENSP00000358107
OG0000213 Aque_XP_003387402	Aque_XP_003389191 Dmel_FBpp0070633	Dmel_FBpp0071834	Dmel_FBpp0077587	Dmel_FBpp0077606	Dmel_FBpp0086935	Dmel_FBpp0088964	Dmel_FBpp0110354	Dmel_FBpp0288826	Dmel_FBpp0289117	Dmel_FBpp0291294 Hsap_ENSP00000217939	Hsap_ENSP00000261908	Hsap_ENSP00000273261	Hsap_ENSP00000282466	Hsap_ENSP00000297267	Hsap_ENSP00000315465	Hsap_ENSP00000319623	Hsap_ENSP00000324967	Hsap_ENSP00000326759	Hsap_ENSP00000327536	Hsap_ENSP00000332773	Hsap_ENSP00000355396	Hsap_ENSP00000373937	Hsap_ENSP00000380903	Hsap_ENSP00000381450	Hsap_ENSP00000383303	Hsap_ENSP00000385899	Hsap_ENSP00000387564	Hsap_ENSP00000389140	Hsap_ENSP00000420524 Mlei_ML004515a	Mlei_ML016346a	Mlei_ML01771a	Mlei_ML02361a	Mlei_ML02384a	Mlei_ML046318a	Mlei_ML04939a	Mlei_ML051914a	Mlei_ML070826a	Mlei_ML073043a	Mlei_ML078919a	Mlei_ML09063a	Mlei_ML11648a	Mlei_ML11901a	Mlei_ML148519a	Mlei_ML14872a	Mlei_ML218914a	Mlei_ML22257a	Mlei_ML22527a	Mlei_ML402916a Ngru_XP_002674668 Nvec_XP_001617445	Nvec_XP_001617540
OG0000214 Acas_g11267	Acas_g11268	Acas_g11311	Acas_g12276	Acas_g3258	Acas_g3299	Acas_g4325	Acas_g5659	Acas_g594	Acas_g7285 Aque_XP_003383675	Aque_XP_003386697	Aque_XP_003387412 Atha_AT4G26560	Atha_AT4G26570	Atha_AT5G24270	Atha_AT5G47100	Atha_AT5G55990 Awhi_Unigene19100_m12817	Awhi_Unigene32383_m19842 Cang_121072	Cang_37968	Cang_40871	Cang_46257	Cang_50203 Cfra_1436T1 Clim_g3523 Cowc_CAOG_05011 Nk52_evm14s307	Nk52_evm1s2609 Ddis_XP_636163	Ddis_XP_636519	Ddis_XP_643630	Ddis_XP_643889	Ddis_XP_643890	Ddis_XP_643895	Ddis_XP_645163	Ddis_XP_646619 Dmel_FBpp0074319	Dmel_FBpp0074320	Dmel_FBpp0074669	Dmel_FBpp0074671	Dmel_FBpp0081181	Dmel_FBpp0081198	Dmel_FBpp0081199	Dmel_FBpp0082151	Dmel_FBpp0290370	Dmel_FBpp0290950	Dmel_FBpp0291978 Ehux_114725 Falb_H696_01248T0 Hsap_ENSP00000226193	Hsap_ENSP00000230361	Hsap_ENSP00000261047	Hsap_ENSP00000262103	Hsap_ENSP00000295156	Hsap_ENSP00000295225	Hsap_ENSP00000310749	Hsap_ENSP00000357726	Hsap_ENSP00000361475	Hsap_ENSP00000361935	Hsap_ENSP00000362056	Hsap_ENSP00000362566
OG0000215 Acas_g10584	Acas_g1083	Acas_g7453	Acas_g9271 Aque_XP_003385060	Aque_XP_003388870 Atha_AT1G01530	Atha_AT1G17310	Atha_AT1G18750	Atha_AT1G22130	Atha_AT1G22590	Atha_AT1G24260	Atha_AT1G26310	Atha_AT1G28460	Atha_AT1G29962	Atha_AT1G31140	Atha_AT1G47760	Atha_AT1G65360	Atha_AT1G69120	Atha_AT1G71692	Atha_AT1G72350	Atha_AT1G77080	Atha_AT1G77950	Atha_AT1G77980	Atha_AT2G03710	Atha_AT2G14210	Atha_AT2G22540	Atha_AT2G22630	Atha_AT2G24840	Atha_AT2G26320	Atha_AT2G34440	Atha_AT2G42830	Atha_AT2G45650	Atha_AT2G45660	Atha_AT3G02310	Atha_AT3G04100	Atha_AT3G05860	Atha_AT3G30260	Atha_AT3G54340	Atha_AT3G57230	Atha_AT3G57390	Atha_AT3G58780	Atha_AT3G61120	Atha_AT3G66656	Atha_AT4G09960	Atha_AT4G11880	Atha_AT4G18960	Atha_AT4G22950	Atha_AT4G24540	Atha_AT4G36590	Atha_AT4G37940	Atha_AT5G10140
OG0000216 Acas_g12329	Acas_g3512	Acas_g5902	Acas_g6359	Acas_g8672 Aque_XP_003383327	Aque_XP_003383931	Aque_XP_003386851 Atha_AT1G31500	Atha_AT1G31530	Atha_AT1G73875	Atha_AT3G18500	Atha_AT3G58560	Atha_AT3G58580	Atha_AT5G11350 Awhi_Unigene18986_m12715	Awhi_Unigene40887_m26130	Awhi_Unigene675_m676	Awhi_Unigene7803_m4897	Awhi_Unigene8107_m5252 Cang_29040	Cang_33535	Cang_346970	Cang_61144 Cfra_0472T1	Cfra_2511T1	Cfra_3305T1 Clim_g2948	Clim_g3576	Clim_g4375 Cowc_CAOG_00687	Cowc_CAOG_04994	Cowc_CAOG_05388 Nk52_evm6s319	Nk52_evm6s621	Nk52_evm7s2604 Ddis_XP_636212 Dmel_FBpp0071992	Dmel_FBpp0083954	Dmel_FBpp0112131	Dmel_FBpp0288678 Ehux_101445	Ehux_115090	Ehux_117605	Ehux_202174	Ehux_213941	Ehux_218359	Ehux_219492	Ehux_449888	Ehux_96881 Hsap_ENSP00000251089	Hsap_ENSP00000261951	Hsap_ENSP00000280614	Hsap_ENSP00000309142	Hsap_ENSP00000355929	Hsap_ENSP00000425571 Ihof_1206	Ihof_2171	Ihof_4043	Ihof_424	Ihof_7021 Mlei_ML02456a	Mlei_ML03269a	Mlei_ML141741a
OG0000217 Acas_g10059	Acas_g15892	Acas_g6415	Acas_g8094 Aque_XP_003382701	Aque_XP_003385156	Aque_XP_003385913	Aque_XP_003387815 Atha_AT1G20760	Atha_AT1G21630	Atha_AT3G20290	Atha_AT4G05520 Awhi_Unigene10583_m7139	Awhi_Unigene11137_m7376	Awhi_Unigene16439_m10136	Awhi_Unigene31879_m19338	Awhi_Unigene33276_m20690	Awhi_Unigene35034_m22116	Awhi_Unigene35035_m22117	Awhi_Unigene35083_m22165	Awhi_Unigene8147_m5298	Awhi_Unigene8250_m5401 Cang_121156	Cang_145444	Cang_62618	Cang_75442 Cfra_0132T1	Cfra_1053T1	Cfra_1899T1	Cfra_2929T1 Clim_g3083	Clim_g3905 Cowc_CAOG_00562	Cowc_CAOG_06353 Nk52_evm28s147	Nk52_evm32s242	Nk52_evm52s621 Ddis_XP_637239	Ddis_XP_640300	Ddis_XP_646135 Dmel_FBpp0072340	Dmel_FBpp0079817	Dmel_FBpp0081031	Dmel_FBpp0082123	Dmel_FBpp0082296 Ehux_235269	Ehux_443014	Ehux_447387	Ehux_448342	Ehux_448884	Ehux_449725	Ehux_451730	Ehux_456074 Falb_H696_00638T0	Falb_H696_03527T0 Hsap_ENSP00000220325	Hsap_ENSP00000263277	Hsap_ENSP00000320516	Hsap_ENSP00000327116	Hsap_ENSP00000333285	Hsap_ENSP00000349824	Hsap_ENSP00000360798	Hsap_ENSP00000392065
OG0000218 Acas_g10427	Acas_g15874	Acas_g169	Acas_g2708	Acas_g5597	Acas_g8326 Aque_XP_003385094	Aque_XP_003385361	Aque_XP_003386760	Aque_XP_003388240	Aque_XP_003388636 Atha_AT1G27630	Atha_AT1G35440	Atha_AT2G26430	Atha_AT4G19560	Atha_AT4G19600	Atha_AT5G45190	Atha_AT5G48630	Atha_AT5G48640 Awhi_Unigene2358_m1678	Awhi_Unigene29793_m18287	Awhi_Unigene35411_m22504	Awhi_Unigene8519_m5700 Cang_199463	Cang_338494	Cang_38190	Cang_53542 Cfra_1970T1	Cfra_2624T1	Cfra_5292T1	Cfra_8113T1 Clim_g4726	Clim_g553	Clim_g5656 Cowc_CAOG_02877	Cowc_CAOG_02974	Cowc_CAOG_08557 Nk52_evm10s2192	Nk52_evm30s288	Nk52_evm41s207 Ddis_XP_637571	Ddis_XP_638121	Ddis_XP_644320 Dmel_FBpp0070418	Dmel_FBpp0074968	Dmel_FBpp0082469	Dmel_FBpp0083045	Dmel_FBpp0085295 Ehux_107086	Ehux_109248	Ehux_241817	Ehux_355575	Ehux_436188	Ehux_450673	Ehux_466351	Ehux_471193 Falb_H696_03159T0	Falb_H696_03911T0	Falb_H696_03911T1	Falb_H696_06345T0 Hsap_ENSP00000261900	Hsap_ENSP00000264157	Hsap_ENSP00000276345
OG0000219 Acas_g12945	Acas_g12946	Acas_g14604	Acas_g2069	Acas_g3061 Aque_XP_003389145 Atha_AT1G64780	Atha_AT2G38290	Atha_AT3G24290	Atha_AT3G24300	Atha_AT4G13510	Atha_AT4G28700 Awhi_Unigene12964_m8388	Awhi_Unigene15619_m9758	Awhi_Unigene21760_m14932	Awhi_Unigene26394_m16345	Awhi_Unigene30750_m18648	Awhi_Unigene32821_m20238	Awhi_Unigene3804_m2840	Awhi_Unigene38305_m24887	Awhi_Unigene4520_m3072	Awhi_Unigene5993_m3465	Awhi_Unigene6187_m3535	Awhi_Unigene6953_m3940	Awhi_Unigene8809_m6026 Cang_104685	Cang_128218	Cang_131241	Cang_68314 Cfra_1088T1	Cfra_2574T1	Cfra_2872T1 Clim_g5047	Clim_g6288 Cowc_CAOG_01985	Cowc_CAOG_07102	Cowc_CAOG_07671 Nk52_evm142s226	Nk52_evm15s503	Nk52_evm21s2531	Nk52_evm4s1401	Nk52_evm7s305	Nk52_evm9s207 Ddis_XP_642123	Ddis_XP_642645	Ddis_XP_647385 Dmel_FBpp0112150 Ehux_122984	Ehux_193894	Ehux_200882	Ehux_201096	Ehux_225229	Ehux_234399	Ehux_235976	Ehux_257877	Ehux_415646	Ehux_433338	Ehux_433750	Ehux_441727	Ehux_451136	Ehux_452779
OG0000220 Acas_g3520 Aque_XP_003387069 Atha_AT1G14170	Atha_AT1G33680	Atha_AT1G51580	Atha_AT2G03110	Atha_AT2G22600	Atha_AT2G25970	Atha_AT3G04610	Atha_AT4G10070	Atha_AT4G18375	Atha_AT4G26000	Atha_AT5G04430	Atha_AT5G15270	Atha_AT5G46190	Atha_AT5G53060	Atha_AT5G64390 Awhi_Unigene16884_m10628	Awhi_Unigene17958_m11892	Awhi_Unigene18617_m12640	Awhi_Unigene38170_m24798 Cang_104783	Cang_57529 Cfra_5179T1 Clim_g777 Cowc_CAOG_07897 Nk52_evm13s248	Nk52_evm71s485	Nk52_evm85s1810 Dmel_FBpp0086222	Dmel_FBpp0089363	Dmel_FBpp0290578	Dmel_FBpp0291831 Ehux_107033	Ehux_206952	Ehux_219461	Ehux_233069	Ehux_236160	Ehux_434384	Ehux_49271 Falb_H696_01943T0 Hsap_ENSP00000263257	Hsap_ENSP00000305556	Hsap_ENSP00000318177	Hsap_ENSP00000352438	Hsap_ENSP00000365439	Hsap_ENSP00000378461	Hsap_ENSP00000381216	Hsap_ENSP00000383168	Hsap_ENSP00000389536	Hsap_ENSP00000438875 Ihof_10109	Ihof_2085	Ihof_2232	Ihof_2282	Ihof_294	Ihof_2965	Ihof_4081	Ihof_8030	Ihof_83 Mlei_ML009618a	Mlei_ML018013a	Mlei_ML020014a	Mlei_ML05202a
OG0000221 Acas_g10036	Acas_g5353	Acas_g8576 Aque_XP_003383190	Aque_XP_003385475 Atha_AT1G09730	Atha_AT1G10570	Atha_AT1G60220	Atha_AT3G06910	Atha_AT3G48480	Atha_AT4G00690	Atha_AT4G15880	Atha_AT4G33620 Awhi_Unigene19755_m13439	Awhi_Unigene19797_m13476	Awhi_Unigene1990_m1397	Awhi_Unigene32709_m20139	Awhi_Unigene32710_m20141 Cang_124570	Cang_165377	Cang_227886	Cang_46083	Cang_46446	Cang_46583	Cang_46884 Cfra_4516T1	Cfra_6163T1	Cfra_8471T1 Clim_g1172	Clim_g2435	Clim_g3959	Clim_g4700 Cowc_CAOG_01269	Cowc_CAOG_03468	Cowc_CAOG_03611	Cowc_CAOG_03899 Nk52_evm12s77	Nk52_evm1s1086	Nk52_evm7s2542 Ddis_XP_629102	Ddis_XP_629677	Ddis_XP_636167 Dmel_FBpp0073537	Dmel_FBpp0074462	Dmel_FBpp0075663	Dmel_FBpp0076659	Dmel_FBpp0112811	Dmel_FBpp0289914 Ehux_205955	Ehux_310524	Ehux_451491	Ehux_463196	Ehux_46753 Falb_H696_02368T0	Falb_H696_04925T0 Hsap_ENSP00000004980	Hsap_ENSP00000296257	Hsap_ENSP00000327197	Hsap_ENSP00000359031	Hsap_ENSP00000377655	Hsap_ENSP00000403712 Ihof_10415	Ihof_5666	Ihof_9559 Mlei_ML13045a
OG0000222 Acas_g1023	Acas_g10425	Acas_g14936	Acas_g17633	Acas_g3253	Acas_g3254	Acas_g437	Acas_g5809	Acas_g5819	Acas_g7413	Acas_g9350 Aque_XP_003385846	Aque_XP_003386675	Aque_XP_003392103 Atha_AT2G18080	Atha_AT2G24280	Atha_AT3G28680	Atha_AT4G36190	Atha_AT4G36195	Atha_AT5G22860	Atha_AT5G65760 Awhi_Unigene20290_m13914	Awhi_Unigene31771_m19222	Awhi_Unigene32172_m19620	Awhi_Unigene33024_m20428	Awhi_Unigene34900_m21972	Awhi_Unigene34901_m21973	Awhi_Unigene7263_m4323	Awhi_Unigene7264_m4324	Awhi_Unigene7265_m4325	Awhi_Unigene8323_m5483	Awhi_Unigene8324_m5484 Cfra_0874T1	Cfra_2595T1	Cfra_6913T1 Clim_g1505	Clim_g2802	Clim_g3745	Clim_g6263	Clim_g6378 Cowc_CAOG_01524	Cowc_CAOG_02959	Cowc_CAOG_07331 Nk52_evm4s284	Nk52_evm7s304	Nk52_evm86s224 Ddis_XP_629262	Ddis_XP_629642	Ddis_XP_635725	Ddis_XP_635876	Ddis_XP_636095	Ddis_XP_636355	Ddis_XP_642272	Ddis_XP_644128 Dmel_FBpp0076608	Dmel_FBpp0080895	Dmel_FBpp0083169	Dmel_FBpp0083170	Dmel_FBpp0083171
OG0000223 Acas_g10497	Acas_g11000	Acas_g11982	Acas_g12175	Acas_g13427	Acas_g1379	Acas_g14029	Acas_g14030	Acas_g14263	Acas_g1486	Acas_g15677	Acas_g1613	Acas_g16301	Acas_g16489	Acas_g16670	Acas_g16937	Acas_g17438	Acas_g2170	Acas_g3597	Acas_g4051	Acas_g6626	Acas_g6903	Acas_g6963	Acas_g8167	Acas_g9373	Acas_g9376 Aque_XP_003383022	Aque_XP_003386162	Aque_XP_003390043	Aque_XP_003390045 Atha_AT1G19110	Atha_AT1G72500 Awhi_Unigene1144_m1125	Awhi_Unigene17808_m11721	Awhi_Unigene18267_m12260	Awhi_Unigene20459_m14075	Awhi_Unigene23077_m15319	Awhi_Unigene34766_m21825	Awhi_Unigene5090_m3210	Awhi_Unigene810_m835	Awhi_Unigene811_m836 Cfra_3712T1 Clim_g6514 Cowc_CAOG_03714	Cowc_CAOG_04759	Cowc_CAOG_07931 Ddis_XP_002649126	Ddis_XP_629483	Ddis_XP_629769	Ddis_XP_629777	Ddis_XP_637567	Ddis_XP_637950	Ddis_XP_637951	Ddis_XP_637952	Ddis_XP_637953	Ddis_XP_647086	Ddis_XP_647286 Hsap_ENSP00000218436
OG0000224 Aque_XP_003387979 Dmel_FBpp0070071	Dmel_FBpp0070072	Dmel_FBpp0070073	Dmel_FBpp0070074	Dmel_FBpp0070482	Dmel_FBpp0070659	Dmel_FBpp0071864	Dmel_FBpp0074978	Dmel_FBpp0079662	Dmel_FBpp0080539	Dmel_FBpp0080631	Dmel_FBpp0081042	Dmel_FBpp0081318	Dmel_FBpp0081462	Dmel_FBpp0081911	Dmel_FBpp0084381	Dmel_FBpp0086327	Dmel_FBpp0088516	Dmel_FBpp0089410	Dmel_FBpp0090974	Dmel_FBpp0288762	Dmel_FBpp0290923 Hsap_ENSP00000231121	Hsap_ENSP00000237316	Hsap_ENSP00000242261	Hsap_ENSP00000242462	Hsap_ENSP00000242994	Hsap_ENSP00000246080	Hsap_ENSP00000264824	Hsap_ENSP00000266744	Hsap_ENSP00000275461	Hsap_ENSP00000295108	Hsap_ENSP00000297142	Hsap_ENSP00000302189	Hsap_ENSP00000302216	Hsap_ENSP00000304676	Hsap_ENSP00000306754	Hsap_ENSP00000317333	Hsap_ENSP00000317580	Hsap_ENSP00000318799	Hsap_ENSP00000318846	Hsap_ENSP00000321445	Hsap_ENSP00000322087	Hsap_ENSP00000326391	Hsap_ENSP00000331040	Hsap_ENSP00000332293	Hsap_ENSP00000333097	Hsap_ENSP00000334547	Hsap_ENSP00000342868	Hsap_ENSP00000345420	Hsap_ENSP00000352565
OG0000225 Acas_g11313	Acas_g15700	Acas_g385	Acas_g4814	Acas_g9477 Aque_XP_003386320	Aque_XP_003386617	Aque_XP_003387385	Aque_XP_003387467	Aque_XP_003391953 Atha_AT1G14510	Atha_AT2G02470	Atha_AT3G11200	Atha_AT3G42790	Atha_AT4G04260	Atha_AT4G22140	Atha_AT4G39100	Atha_AT5G05610	Atha_AT5G20510	Atha_AT5G26210 Cang_104126	Cang_119812	Cang_124569	Cang_380436	Cang_56372	Cang_73812 Cfra_0050T1	Cfra_5440T1 Clim_g1640	Clim_g5123	Clim_g6814 Cowc_CAOG_02306	Cowc_CAOG_06743 Nk52_evm45s2657	Nk52_evm46s208	Nk52_evm6s744 Ddis_XP_001134472	Ddis_XP_641903 Dmel_FBpp0071262	Dmel_FBpp0071263	Dmel_FBpp0072421	Dmel_FBpp0073236	Dmel_FBpp0289915	Dmel_FBpp0290255	Dmel_FBpp0290845 Ehux_107169	Ehux_110687	Ehux_216152	Ehux_225010	Ehux_227661	Ehux_227673	Ehux_244501	Ehux_255328	Ehux_446541	Ehux_447961	Ehux_448575	Ehux_449423	Ehux_66647 Hsap_ENSP00000262043	Hsap_ENSP00000266070	Hsap_ENSP00000315454
OG0000226 Acas_g12749	Acas_g12760	Acas_g3108	Acas_g3109 Aque_XP_003389739	Aque_XP_003389741 Awhi_Unigene16723_m10464	Awhi_Unigene19889_m13549	Awhi_Unigene35850_m22950	Awhi_Unigene7371_m4429 Cang_122023	Cang_125529	Cang_144140	Cang_57418 Cfra_5416T1	Cfra_7458T1 Dmel_FBpp0070000	Dmel_FBpp0070759	Dmel_FBpp0070837	Dmel_FBpp0078531	Dmel_FBpp0078885	Dmel_FBpp0079993	Dmel_FBpp0081559	Dmel_FBpp0083345	Dmel_FBpp0083710	Dmel_FBpp0083711	Dmel_FBpp0083712	Dmel_FBpp0084518	Dmel_FBpp0084624	Dmel_FBpp0084697	Dmel_FBpp0084698	Dmel_FBpp0084699	Dmel_FBpp0084718	Dmel_FBpp0087046	Dmel_FBpp0291157 Ehux_104923	Ehux_215544	Ehux_234781	Ehux_235880	Ehux_243348	Ehux_250143 Hsap_ENSP00000302051	Hsap_ENSP00000347409	Hsap_ENSP00000353679	Hsap_ENSP00000364028	Hsap_ENSP00000367668	Hsap_ENSP00000368682	Hsap_ENSP00000384223 Ihof_2139	Ihof_4475	Ihof_4476	Ihof_9125	Ihof_9424	Ihof_9425	Ihof_9469 Mlei_ML00955a	Mlei_ML042115a	Mlei_ML273223a	Mlei_ML47551a Mver_01392
OG0000227 Acas_g1075	Acas_g13789	Acas_g16224	Acas_g5268	Acas_g5269	Acas_g7168 Aque_XP_003383820 Atha_AT1G02610	Atha_AT1G11020	Atha_AT1G14260	Atha_AT1G50440	Atha_AT2G01275	Atha_AT2G02960	Atha_AT2G22120	Atha_AT3G06330	Atha_AT3G09760	Atha_AT3G47550	Atha_AT4G02075	Atha_AT4G32670	Atha_AT4G34100	Atha_AT5G18760	Atha_AT5G38070	Atha_AT5G62460 Awhi_Unigene18327_m12324 Cang_113333 Cfra_5240T1 Clim_g4483	Clim_g4559 Cowc_CAOG_00321	Cowc_CAOG_04195	Cowc_CAOG_07627 Nk52_evm20s153 Ddis_XP_638225	Ddis_XP_644750 Dmel_FBpp0070905	Dmel_FBpp0072779	Dmel_FBpp0076222	Dmel_FBpp0085553 Ehux_118832	Ehux_196406	Ehux_208607	Ehux_236656	Ehux_237427	Ehux_243622	Ehux_254556	Ehux_432925	Ehux_438620	Ehux_441401	Ehux_457082 Falb_H696_04526T0 Hsap_ENSP00000215555	Hsap_ENSP00000259050	Hsap_ENSP00000266643	Hsap_ENSP00000273067	Hsap_ENSP00000274140	Hsap_ENSP00000309141	Hsap_ENSP00000311496	Hsap_ENSP00000333181	Hsap_ENSP00000411848	Hsap_ENSP00000421322 Ihof_1380	Ihof_8281 Mlei_ML00199a	Mlei_ML04612a	Mlei_ML06538a
OG0000228 Acas_g5674	Acas_g6810	Acas_g8049 Aque_XP_003383413	Aque_XP_003388201 Awhi_Unigene35965_m23068	Awhi_Unigene7292_m4341	Awhi_Unigene7293_m4342	Awhi_Unigene8244_m5397	Awhi_Unigene8286_m5447 Cang_127396	Cang_36871	Cang_48850 Cfra_0552T1	Cfra_2506T1	Cfra_6237T1 Clim_g2198	Clim_g3309 Cowc_CAOG_02144	Cowc_CAOG_07788 Nk52_evm11s914	Nk52_evm15s252	Nk52_evm2s320	Nk52_evm35s914	Nk52_evm44s2118	Nk52_evm6s309	Nk52_evm6s77 Ddis_XP_638386	Ddis_XP_638387	Ddis_XP_638585 Dmel_FBpp0074746	Dmel_FBpp0074747	Dmel_FBpp0083537	Dmel_FBpp0084975	Dmel_FBpp0288483 Ehux_105134	Ehux_212619	Ehux_224946	Ehux_257014 Falb_H696_03956T0 Hsap_ENSP00000256997	Hsap_ENSP00000270593	Hsap_ENSP00000323036	Hsap_ENSP00000358241 Ihof_2932	Ihof_7502 Mlei_ML032414a	Mlei_ML20028a Mver_04931	Mver_05606	Mver_05657	Mver_11938 Mvib_comp15539_c0_seq1_m36134 Ngru_XP_002673283	Ngru_XP_002677113	Ngru_XP_002677354	Ngru_XP_002681034	Ngru_XP_002681774 Nvec_XP_001619106	Nvec_XP_001622243	Nvec_XP_001627643	Nvec_XP_001630297	Nvec_XP_001633091	Nvec_XP_001637501	Nvec_XP_001639789 Pgem_Unigene12397_Pirum_gemmatam7977	Pgem_Unigene40708_Pirum_gemmatam25271	Pgem_Unigene40709_Pirum_gemmatam25272	Pgem_Unigene40710_Pirum_gemmatam25273
OG0000229 Atha_AT2G39130	Atha_AT2G41190	Atha_AT3G09330	Atha_AT3G09340	Atha_AT3G28960	Atha_AT3G54830	Atha_AT5G02170	Atha_AT5G02180	Atha_AT5G15240	Atha_AT5G16740 Awhi_Unigene13851_m9004	Awhi_Unigene17061_m10820	Awhi_Unigene19003_m12731	Awhi_Unigene20271_m13902	Awhi_Unigene22438_m15139	Awhi_Unigene27385_m16666	Awhi_Unigene31676_m19127	Awhi_Unigene40228_m25731	Awhi_Unigene9209_m6516 Cfra_2772T1	Cfra_3818T1	Cfra_3819T1	Cfra_3827T1	Cfra_3828T1 Clim_g1523	Clim_g1680	Clim_g1816	Clim_g5208	Clim_g5753 Cowc_CAOG_07607 Nk52_evm12s242	Nk52_evm12s2473	Nk52_evm14s2367	Nk52_evm17s1444	Nk52_evm17s265	Nk52_evm19s2596	Nk52_evm1s1111	Nk52_evm1s1475	Nk52_evm1s990	Nk52_evm20s1569	Nk52_evm22s151	Nk52_evm22s554	Nk52_evm24s2612	Nk52_evm26s684	Nk52_evm32s355	Nk52_evm33s355	Nk52_evm3s533	Nk52_evm5s1400	Nk52_evm5s227	Nk52_evm5s2473	Nk52_evm5s2568	Nk52_evm7s206	Nk52_evm85s221	Nk52_evm85s223	Nk52_evm9s268 Dmel_FBpp0084126
OG0000230 Acas_g14768	Acas_g17412	Acas_g1766	Acas_g2562	Acas_g2631	Acas_g4610	Acas_g5314	Acas_g9890 Aque_XP_003382646	Aque_XP_003383919	Aque_XP_003384491	Aque_XP_003388641 Atha_AT3G43790	Atha_AT5G13740	Atha_AT5G13750 Awhi_Unigene10882_m7268	Awhi_Unigene24119_m15769	Awhi_Unigene32323_m19783	Awhi_Unigene32324_m19784	Awhi_Unigene39923_m25552	Awhi_Unigene9831_m6803 Cang_135983	Cang_44322	Cang_54464	Cang_55552	Cang_60880 Clim_g1729	Clim_g1927	Clim_g4691 Cowc_CAOG_02001	Cowc_CAOG_09180 Nk52_evm11s157	Nk52_evm18s294	Nk52_evm18s539	Nk52_evm19s539	Nk52_evm20s539	Nk52_evm25s675	Nk52_evm28s2496	Nk52_evm2s167	Nk52_evm32s294	Nk52_evm35s296	Nk52_evm40s156	Nk52_evm41s156	Nk52_evm4s1762	Nk52_evm50s2152 Ddis_XP_637094	Ddis_XP_639271	Ddis_XP_646434 Dmel_FBpp0083412 Ehux_103702	Ehux_113740	Ehux_119012	Ehux_194657	Ehux_204095	Ehux_204096	Ehux_207838	Ehux_208098	Ehux_212587	Ehux_218770	Ehux_219219
OG0000231 Acas_g12280	Acas_g14780	Acas_g17771	Acas_g18065	Acas_g1852	Acas_g6726	Acas_g9069 Aque_XP_003383116	Aque_XP_003386798	Aque_XP_003386799	Aque_XP_003386800	Aque_XP_003388050	Aque_XP_003388735 Atha_AT2G42005	Atha_AT3G11900	Atha_AT4G38250	Atha_AT5G65990 Awhi_Unigene17698_m11592	Awhi_Unigene20337_m13959	Awhi_Unigene28307_m16996	Awhi_Unigene7373_m4431 Cang_63884 Cfra_5586T1	Cfra_6831T1	Cfra_7668T1 Clim_g1984	Clim_g6366	Clim_g699 Cowc_CAOG_00255 Nk52_evm1s2014	Nk52_evm30s307	Nk52_evm3s334 Ddis_XP_629306 Dmel_FBpp0072724	Dmel_FBpp0074157	Dmel_FBpp0075928	Dmel_FBpp0075931	Dmel_FBpp0075972	Dmel_FBpp0076157	Dmel_FBpp0079271	Dmel_FBpp0086994	Dmel_FBpp0087294	Dmel_FBpp0288459	Dmel_FBpp0289425 Ehux_123614	Ehux_195046	Ehux_195047	Ehux_195048	Ehux_200073	Ehux_237285	Ehux_445622	Ehux_455582 Falb_H696_01310T0 Hsap_ENSP00000243389	Hsap_ENSP00000317382	Hsap_ENSP00000334223	Hsap_ENSP00000366942 Ihof_785	Ihof_8377 Mlei_ML073035a	Mlei_ML085720a	Mlei_ML104321a Mver_01567	Mver_03173	Mver_05977	Mver_07777
OG0000232 Acas_g11527	Acas_g11850	Acas_g13468	Acas_g13876	Acas_g15055	Acas_g15258	Acas_g15532	Acas_g15754	Acas_g16023	Acas_g16880	Acas_g1904	Acas_g1905	Acas_g4454	Acas_g8617	Acas_g8894 Aque_XP_003382550	Aque_XP_003383418	Aque_XP_003383636	Aque_XP_003383637	Aque_XP_003383638	Aque_XP_003387138	Aque_XP_003387219	Aque_XP_003392013 Atha_AT1G02640	Atha_AT1G78060	Atha_AT3G19620	Atha_AT3G47000	Atha_AT3G47010	Atha_AT3G47040	Atha_AT3G47050	Atha_AT3G62710	Atha_AT5G04885	Atha_AT5G09700	Atha_AT5G09730	Atha_AT5G10560	Atha_AT5G20940	Atha_AT5G20950	Atha_AT5G49360	Atha_AT5G64570 Awhi_Unigene11226_m7413	Awhi_Unigene1509_m1223	Awhi_Unigene22810_m15245	Awhi_Unigene24285_m15844	Awhi_Unigene25082_m16139	Awhi_Unigene30291_m18600 Cowc_CAOG_05297 Nk52_evm33s2356	Nk52_evm47s2579	Nk52_evm72s210	Nk52_evm74s210 Ddis_XP_629427 Ehux_104185	Ehux_105012	Ehux_117563	Ehux_195307	Ehux_211563	Ehux_220923
OG0000233 Acas_g12151	Acas_g14702	Acas_g3950	Acas_g7256 Aque_XP_003382635	Aque_XP_003384060	Aque_XP_003386082	Aque_XP_003386083	Aque_XP_003386084	Aque_XP_003386085 Atha_AT5G42320 Cang_122347	Cang_127466	Cang_129984	Cang_142839	Cang_177852	Cang_177857	Cang_284498	Cang_43504	Cang_44618	Cang_46521	Cang_55657	Cang_57939	Cang_58236	Cang_58520	Cang_76080 Cfra_7049T1	Cfra_7050T1 Clim_g6058 Cowc_CAOG_02106	Cowc_CAOG_03985 Nk52_evm48s212 Dmel_FBpp0070798	Dmel_FBpp0070801	Dmel_FBpp0074185	Dmel_FBpp0076542	Dmel_FBpp0076562	Dmel_FBpp0076564	Dmel_FBpp0076565	Dmel_FBpp0076578	Dmel_FBpp0076579	Dmel_FBpp0076604	Dmel_FBpp0079138	Dmel_FBpp0079139	Dmel_FBpp0079463	Dmel_FBpp0079464	Dmel_FBpp0083823	Dmel_FBpp0086967	Dmel_FBpp0087954	Dmel_FBpp0271927	Dmel_FBpp0288871 Ehux_115016	Ehux_217682	Ehux_240400	Ehux_242119	Ehux_244883	Ehux_61288 Falb_H696_00907T0	Falb_H696_02168T0	Falb_H696_04566T0
OG0000234 Acas_g14910	Acas_g3965 Aque_XP_003384504	Aque_XP_003384542	Aque_XP_003384864	Aque_XP_003385734	Aque_XP_003386370 Atha_AT1G18350	Atha_AT1G51660	Atha_AT1G73500	Atha_AT3G06230	Atha_AT3G21220	Atha_AT4G26070	Atha_AT4G29810	Atha_AT5G40440	Atha_AT5G56580 Awhi_Unigene24719_m16056	Awhi_Unigene28744_m17394	Awhi_Unigene34773_m21830	Awhi_Unigene35570_m22671	Awhi_Unigene35615_m22709	Awhi_Unigene35616_m22710 Cang_129364	Cang_218689	Cang_49749 Cfra_5305T1	Cfra_6538T1	Cfra_7646T1 Clim_g3418	Clim_g5235	Clim_g599 Cowc_CAOG_00295	Cowc_CAOG_01638	Cowc_CAOG_05490 Nk52_evm19s307	Nk52_evm5s2241	Nk52_evm8s578 Ddis_XP_646465 Dmel_FBpp0071248	Dmel_FBpp0073551	Dmel_FBpp0073578	Dmel_FBpp0081378 Ehux_101283	Ehux_67969	Ehux_68167	Ehux_75779 Falb_H696_02114T0 Hsap_ENSP00000178640	Hsap_ENSP00000262948	Hsap_ENSP00000302486	Hsap_ENSP00000319139	Hsap_ENSP00000351997	Hsap_ENSP00000410402	Hsap_ENSP00000443946 Ihof_3036	Ihof_3412	Ihof_5413	Ihof_6407 Mlei_ML017945a	Mlei_ML02994a	Mlei_ML07766a Mver_00495	Mver_03505	Mver_07199	Mver_09685 Mvib_comp10952_c0_seq1_m13939	Mvib_comp10952_c0_seq2_m13941
OG0000235 Awhi_Unigene10129_m6952	Awhi_Unigene10969_m7300	Awhi_Unigene10_m11	Awhi_Unigene11115_m7367	Awhi_Unigene12020_m7769	Awhi_Unigene15723_m9826	Awhi_Unigene17321_m11108	Awhi_Unigene17322_m11109	Awhi_Unigene19322_m13030	Awhi_Unigene23057_m15312	Awhi_Unigene23796_m15598	Awhi_Unigene23940_m15679	Awhi_Unigene24420_m15919	Awhi_Unigene24752_m16071	Awhi_Unigene26335_m16331	Awhi_Unigene29046_m17638	Awhi_Unigene29047_m17639	Awhi_Unigene29048_m17640	Awhi_Unigene34509_m21546	Awhi_Unigene34510_m21547	Awhi_Unigene39190_m25107	Awhi_Unigene39648_m25377	Awhi_Unigene40765_m26073	Awhi_Unigene40921_m26150	Awhi_Unigene41132_m26277	Awhi_Unigene42625_m27113	Awhi_Unigene6758_m3735	Awhi_Unigene6793_m3746	Awhi_Unigene718_m723	Awhi_Unigene816_m841	Awhi_Unigene8899_m6141 Ddis_XP_629549	Ddis_XP_641316	Ddis_XP_643336	Ddis_XP_643967	Ddis_XP_644675	Ddis_XP_644691	Ddis_XP_644692	Ddis_XP_646620	Ddis_XP_646621 Hsap_ENSP00000265371	Hsap_ENSP00000268150	Hsap_ENSP00000296591	Hsap_ENSP00000321646	Hsap_ENSP00000342422	Hsap_ENSP00000353582	Hsap_ENSP00000369320 Ngru_XP_002670909 Nvec_XP_001618400	Nvec_XP_001619028	Nvec_XP_001619206	Nvec_XP_001619622	Nvec_XP_001619843	Nvec_XP_001619948
OG0000236 Acas_g11005	Acas_g13719	Acas_g15335	Acas_g8789	Acas_g9510 Aque_XP_003382557	Aque_XP_003386867 Atha_AT1G08860	Atha_AT5G07300	Atha_AT5G61900 Awhi_Unigene31945_m19395	Awhi_Unigene6932_m3914 Cang_388133	Cang_48186 Cfra_5940T1	Cfra_7607T1 Clim_g4334 Cowc_CAOG_08597 Nk52_evm18s248	Nk52_evm1s828	Nk52_evm27s252	Nk52_evm28s252	Nk52_evm60s221	Nk52_evm8s2085 Ddis_XP_001134504	Ddis_XP_629291	Ddis_XP_635630	Ddis_XP_638407	Ddis_XP_645029	Ddis_XP_645884	Ddis_XP_647223 Ehux_95135 Hsap_ENSP00000198765	Hsap_ENSP00000244751	Hsap_ENSP00000268720	Hsap_ENSP00000290776	Hsap_ENSP00000317257	Hsap_ENSP00000329748	Hsap_ENSP00000373343	Hsap_ENSP00000421646	Hsap_ENSP00000440077 Ihof_10115	Ihof_7093	Ihof_9661 Mlei_ML072819a	Mlei_ML07523a	Mlei_ML07526a	Mlei_ML085212a	Mlei_ML08528a	Mlei_ML463537a Mver_05844	Mver_09483 Mvib_comp12300_c0_seq1_m18561	Mvib_comp12876_c0_seq1_m20841	Mvib_comp12876_c0_seq2_m20843	Mvib_comp12876_c0_seq3_m20845	Mvib_comp12876_c0_seq4_m20847	Mvib_comp14061_c0_seq1_m26428	Mvib_comp14061_c0_seq2_m26430 Ngru_XP_002669133	Ngru_XP_002669532	Ngru_XP_002670267	Ngru_XP_002671889	Ngru_XP_002672637	Ngru_XP_002674004	Ngru_XP_002674370
OG0000237 Acas_g10033	Acas_g1025	Acas_g13343	Acas_g17751	Acas_g3149	Acas_g4419	Acas_g6005 Aque_XP_003383110	Aque_XP_003385513	Aque_XP_003385515 Awhi_Unigene13160_m8532	Awhi_Unigene20158_m13798	Awhi_Unigene20824_m14410	Awhi_Unigene20923_m14506	Awhi_Unigene20924_m14507	Awhi_Unigene24373_m15897	Awhi_Unigene25127_m16149	Awhi_Unigene26490_m16376	Awhi_Unigene33201_m20608	Awhi_Unigene3660_m2729 Cang_144723	Cang_34126	Cang_46952 Cfra_0085T1	Cfra_2486T1	Cfra_3852T1	Cfra_5110T1 Clim_g2865	Clim_g6759 Cowc_CAOG_01506	Cowc_CAOG_02349	Cowc_CAOG_06832 Nk52_evm43s208 Ddis_XP_637214	Ddis_XP_641747	Ddis_XP_645105 Dmel_FBpp0077947	Dmel_FBpp0112308	Dmel_FBpp0290831 Ehux_221657	Ehux_222419	Ehux_241767	Ehux_260450	Ehux_462925	Ehux_463741	Ehux_471079 Falb_H696_00428T0	Falb_H696_00428T1	Falb_H696_00865T0	Falb_H696_03178T0	Falb_H696_03856T0 Hsap_ENSP00000020673	Hsap_ENSP00000245796	Hsap_ENSP00000248901	Hsap_ENSP00000274710	Hsap_ENSP00000297044	Hsap_ENSP00000315662	Hsap_ENSP00000354398	Hsap_ENSP00000379712	Hsap_ENSP00000391648	Hsap_ENSP00000401704	Hsap_ENSP00000402299 Ihof_1544
OG0000238 Acas_g13615	Acas_g15574	Acas_g18227	Acas_g4330	Acas_g7889	Acas_g8404	Acas_g8991	Acas_g9772 Aque_XP_003384179	Aque_XP_003385380	Aque_XP_003390760 Atha_AT1G62830	Atha_AT1G65840	Atha_AT2G43020	Atha_AT3G10390	Atha_AT3G13682	Atha_AT3G59050	Atha_AT4G16310	Atha_AT4G29720	Atha_AT5G13700 Awhi_Unigene21437_m14820	Awhi_Unigene36876_m23865	Awhi_Unigene37680_m24429	Awhi_Unigene38459_m24922	Awhi_Unigene5806_m3397	Awhi_Unigene6491_m3647	Awhi_Unigene7842_m4947 Cang_57037 Clim_g4442	Clim_g513	Clim_g5801 Cowc_CAOG_00719 Nk52_evm17s2531	Nk52_evm1s280 Ddis_XP_636261	Ddis_XP_636317 Dmel_FBpp0074594	Dmel_FBpp0074952	Dmel_FBpp0074958	Dmel_FBpp0076286	Dmel_FBpp0080699	Dmel_FBpp0081369	Dmel_FBpp0087206 Ehux_106708	Ehux_116825	Ehux_201294	Ehux_222436	Ehux_238919	Ehux_238920	Ehux_245889	Ehux_445147	Ehux_458922	Ehux_464470	Ehux_464657	Ehux_fgenesh_newKGs_kg_17__83__jgi Falb_H696_05909T0 Hsap_ENSP00000278060	Hsap_ENSP00000307252	Hsap_ENSP00000373522	Hsap_ENSP00000383042 Ihof_6765 Mlei_ML06333a	Mlei_ML095310a Mver_05868	Mver_06116
OG0000239 Acas_g13027	Acas_g1590	Acas_g16814	Acas_g2488	Acas_g452	Acas_g6134	Acas_g980 Aque_XP_003388596	Aque_XP_003391003	Aque_XP_003391483 Atha_AT1G56345	Atha_AT1G76050	Atha_AT1G78910	Atha_AT3G19440	Atha_AT3G52260	Atha_AT5G51140 Awhi_Unigene11010_m7317	Awhi_Unigene14264_m9069	Awhi_Unigene20737_m14338	Awhi_Unigene22316_m15110	Awhi_Unigene37612_m24370 Cang_36141	Cang_37710	Cang_42697	Cang_63157 Cfra_6980T1 Clim_g2631	Clim_g935 Cowc_CAOG_03507	Cowc_CAOG_03692 Nk52_evm35s304	Nk52_evm4s2340	Nk52_evm6s2340	Nk52_evm6s324 Ddis_XP_638115	Ddis_XP_640817	Ddis_XP_641190	Ddis_XP_645472 Dmel_FBpp0079622	Dmel_FBpp0079629 Ehux_100428	Ehux_115056	Ehux_198574	Ehux_200027	Ehux_201067	Ehux_211996	Ehux_225196	Ehux_227033	Ehux_228909	Ehux_230216	Ehux_255524	Ehux_43988	Ehux_44091	Ehux_447762	Ehux_448096	Ehux_454260	Ehux_456425	Ehux_57235	Ehux_57237	Ehux_57249	Ehux_57488
OG0000240 Acas_g1085	Acas_g11299	Acas_g17259	Acas_g18593	Acas_g2680	Acas_g3280	Acas_g4195 Aque_XP_003382460	Aque_XP_003383033	Aque_XP_003384100	Aque_XP_003385054	Aque_XP_003389033	Aque_XP_003391207	Aque_XP_003391744 Atha_AT1G27520	Atha_AT1G30000	Atha_AT1G51590	Atha_AT3G21160	Atha_AT5G43710 Awhi_Unigene12435_m8040	Awhi_Unigene39113_m25084 Cang_127674	Cang_304738	Cang_43906 Cfra_1377T1	Cfra_6652T1 Clim_g1436	Clim_g2855 Cowc_CAOG_00616	Cowc_CAOG_00804	Cowc_CAOG_05160	Cowc_CAOG_06716 Nk52_evm12s216	Nk52_evm29s1485	Nk52_evm8s39 Ddis_XP_629442	Ddis_XP_638603	Ddis_XP_638604	Ddis_XP_638605	Ddis_XP_642889	Ddis_XP_646930 Dmel_FBpp0070337	Dmel_FBpp0080019	Dmel_FBpp0084785	Dmel_FBpp0084876	Dmel_FBpp0288908 Ehux_209599	Ehux_235221	Ehux_237798	Ehux_237799	Ehux_245655	Ehux_434516	Ehux_447984	Ehux_455715	Ehux_464075	Ehux_64898 Falb_H696_05374T0 Hsap_ENSP00000256497	Hsap_ENSP00000318147	Hsap_ENSP00000348959	Hsap_ENSP00000357453	Hsap_ENSP00000363452	Hsap_ENSP00000363616
OG0000241 Acas_g1771	Acas_g2794	Acas_g3129	Acas_g4141 Aque_XP_003385225	Aque_XP_003386729	Aque_XP_003387992	Aque_XP_003390321	Aque_XP_003390526	Aque_XP_003390854	Aque_XP_003390867	Aque_XP_003391155	Aque_XP_003391637	Aque_XP_003391918	Aque_XP_003391943	Aque_XP_003392111	Aque_XP_003392148 Atha_AT1G01940	Atha_AT2G36130	Atha_AT4G33060	Atha_AT5G67530 Awhi_Unigene32375_m19833	Awhi_Unigene32718_m20147	Awhi_Unigene32719_m20148	Awhi_Unigene37432_m24244	Awhi_Unigene9105_m6398 Cang_113455	Cang_120791	Cang_126643	Cang_57183	Cang_63196 Cfra_2059T1	Cfra_3052T1	Cfra_6145T1	Cfra_8088T1 Cowc_CAOG_02076	Cowc_CAOG_03893	Cowc_CAOG_04271	Cowc_CAOG_06485 Nk52_evm17s266	Nk52_evm1s767	Nk52_evm75s230	Nk52_evm98s151 Ddis_XP_001733009	Ddis_XP_629967	Ddis_XP_646239	Ddis_XP_647340 Dmel_FBpp0072463	Dmel_FBpp0075761	Dmel_FBpp0086323	Dmel_FBpp0087366 Ehux_205479	Ehux_450103	Ehux_451960	Ehux_457808	Ehux_64857 Falb_H696_00103T0	Falb_H696_00355T0	Falb_H696_00972T0 Hsap_ENSP00000362803	Hsap_ENSP00000370460	Hsap_ENSP00000386893
OG0000242 Acas_g12798	Acas_g2295 Aque_XP_003383257	Aque_XP_003383258	Aque_XP_003385196	Aque_XP_003387422	Aque_XP_003391387 Atha_AT1G07140	Atha_AT1G52380	Atha_AT2G30060	Atha_AT3G15970	Atha_AT5G58590 Awhi_Unigene16356_m10054	Awhi_Unigene17226_m11003	Awhi_Unigene19569_m13265	Awhi_Unigene20167_m13804	Awhi_Unigene27077_m16556	Awhi_Unigene36134_m23291	Awhi_Unigene36514_m23621	Awhi_Unigene36515_m23622	Awhi_Unigene36516_m23623	Awhi_Unigene40925_m26152	Awhi_Unigene664_m658	Awhi_Unigene7457_m4531	Awhi_Unigene7682_m4765	Awhi_Unigene777_m775	Awhi_Unigene801_m817	Awhi_Unigene865_m881 Cang_127268	Cang_24885	Cang_32416 Cfra_1439T1	Cfra_5491T1	Cfra_5563T1	Cfra_6403T1 Clim_g2610	Clim_g665 Cowc_CAOG_05880 Nk52_evm14s262	Nk52_evm14s273	Nk52_evm36s1737 Ddis_XP_637284	Ddis_XP_642253 Dmel_FBpp0083859	Dmel_FBpp0084188 Ehux_452973 Falb_H696_02178T0	Falb_H696_06223T0 Hsap_ENSP00000016946	Hsap_ENSP00000283195	Hsap_ENSP00000303659	Hsap_ENSP00000306637	Hsap_ENSP00000341483	Hsap_ENSP00000347081	Hsap_ENSP00000381214	Hsap_ENSP00000381253	Hsap_ENSP00000404298	Hsap_ENSP00000421853 Ihof_2539	Ihof_2803	Ihof_3837	Ihof_4367	Ihof_4368	Ihof_7943
OG0000243 Aque_XP_003382548	Aque_XP_003383429	Aque_XP_003384423	Aque_XP_003384424	Aque_XP_003385547	Aque_XP_003385883	Aque_XP_003385887	Aque_XP_003385889	Aque_XP_003386340	Aque_XP_003386946	Aque_XP_003386947	Aque_XP_003386948	Aque_XP_003386959	Aque_XP_003386984	Aque_XP_003387764	Aque_XP_003390474	Aque_XP_003390475	Aque_XP_003391227	Aque_XP_003391425	Aque_XP_003392011 Atha_AT1G13420	Atha_AT1G13430	Atha_AT1G18590	Atha_AT1G28170	Atha_AT1G74090	Atha_AT1G74100	Atha_AT2G03750	Atha_AT2G03760	Atha_AT2G03770	Atha_AT2G14920	Atha_AT2G27570	Atha_AT3G45070	Atha_AT3G45080	Atha_AT3G51210	Atha_AT4G26280	Atha_AT5G07000	Atha_AT5G07010	Atha_AT5G43690 Dmel_FBpp0071989	Dmel_FBpp0081454	Dmel_FBpp0086735	Dmel_FBpp0113033 Ehux_102803	Ehux_123422	Ehux_201867	Ehux_220026	Ehux_220180	Ehux_235496	Ehux_242166	Ehux_437169	Ehux_437657	Ehux_439634	Ehux_446001
OG0000244 Ehux_208375	Ehux_224653	Ehux_231789	Ehux_237302	Ehux_250374	Ehux_453084 Hsap_ENSP00000228434	Hsap_ENSP00000228438	Hsap_ENSP00000229332	Hsap_ENSP00000240618	Hsap_ENSP00000250340	Hsap_ENSP00000254868	Hsap_ENSP00000259053	Hsap_ENSP00000261340	Hsap_ENSP00000264072	Hsap_ENSP00000265306	Hsap_ENSP00000266551	Hsap_ENSP00000269299	Hsap_ENSP00000272367	Hsap_ENSP00000279544	Hsap_ENSP00000296130	Hsap_ENSP00000299642	Hsap_ENSP00000299663	Hsap_ENSP00000299665	Hsap_ENSP00000302569	Hsap_ENSP00000315477	Hsap_ENSP00000316228	Hsap_ENSP00000327599	Hsap_ENSP00000332723	Hsap_ENSP00000339356	Hsap_ENSP00000344563	Hsap_ENSP00000347140	Hsap_ENSP00000353500	Hsap_ENSP00000361366	Hsap_ENSP00000361400	Hsap_ENSP00000363079	Hsap_ENSP00000371505	Hsap_ENSP00000383115	Hsap_ENSP00000386378	Hsap_ENSP00000390661	Hsap_ENSP00000393719	Hsap_ENSP00000396163	Hsap_ENSP00000397082	Hsap_ENSP00000411770	Hsap_ENSP00000438244 Mlei_ML002511a	Mlei_ML01785a	Mlei_ML056959a	Mlei_ML090113a	Mlei_ML17013a	Mlei_ML216321a	Mlei_ML35389a Mvib_comp15494_c20_seq1_m35656 Nvec_XP_001618503
OG0000245 Aque_XP_003384857	Aque_XP_003385102	Aque_XP_003385819	Aque_XP_003386184	Aque_XP_003386250	Aque_XP_003388169	Aque_XP_003388296 Dmel_FBpp0074675	Dmel_FBpp0075001	Dmel_FBpp0077167	Dmel_FBpp0077708	Dmel_FBpp0081987	Dmel_FBpp0082424	Dmel_FBpp0087309 Hsap_ENSP00000215473	Hsap_ENSP00000224721	Hsap_ENSP00000231484	Hsap_ENSP00000260147	Hsap_ENSP00000261800	Hsap_ENSP00000262738	Hsap_ENSP00000271332	Hsap_ENSP00000287008	Hsap_ENSP00000298047	Hsap_ENSP00000299441	Hsap_ENSP00000349408	Hsap_ENSP00000349768	Hsap_ENSP00000355082	Hsap_ENSP00000362125	Hsap_ENSP00000367096	Hsap_ENSP00000367151	Hsap_ENSP00000377862	Hsap_ENSP00000386653	Hsap_ENSP00000420840	Hsap_ENSP00000436557	Hsap_ENSP00000441802	Hsap_ENSP00000445694 Mlei_ML00359a	Mlei_ML07213a	Mlei_ML092621a	Mlei_ML106619a	Mlei_ML106621a	Mlei_ML24141a	Mlei_ML24143a Mvib_comp14953_c2_seq1_m31612	Mvib_comp15955_c4_seq1_m41686	Mvib_comp15955_c5_seq1_m41689	Mvib_comp15955_c5_seq2_m41693	Mvib_comp15955_c5_seq3_m41697	Mvib_comp15955_c5_seq4_m41701	Mvib_comp15955_c6_seq1_m41710	Mvib_comp283625_c0_seq1_m47020 Nvec_XP_001617773	Nvec_XP_001621773	Nvec_XP_001622464	Nvec_XP_001625458
OG0000246 Acas_g11524	Acas_g14594	Acas_g2312	Acas_g2370	Acas_g2379	Acas_g2716	Acas_g3553	Acas_g4459	Acas_g623	Acas_g6576	Acas_g9584	Acas_g979	Acas_g9846 Aque_XP_003383259	Aque_XP_003386462	Aque_XP_003386838	Aque_XP_003388221	Aque_XP_003389503	Aque_XP_003391784 Atha_AT3G10550	Atha_AT5G04540 Awhi_Unigene12325_m7968	Awhi_Unigene1897_m1323	Awhi_Unigene27285_m16628	Awhi_Unigene40048_m25623	Awhi_Unigene42164_m26849 Cang_90029 Cfra_1748T1	Cfra_6442T1 Clim_g1622	Clim_g2951	Clim_g3982 Cowc_CAOG_00119	Cowc_CAOG_00703	Cowc_CAOG_01035	Cowc_CAOG_06376	Cowc_CAOG_07864	Cowc_CAOG_07986 Nk52_evm12s360	Nk52_evm16s554	Nk52_evm35s805 Ddis_XP_001134519	Ddis_XP_629214	Ddis_XP_635951	Ddis_XP_638519	Ddis_XP_640454	Ddis_XP_642280	Ddis_XP_645554	Ddis_XP_645840	Ddis_XP_645977 Dmel_FBpp0071938	Dmel_FBpp0076242	Dmel_FBpp0078854	Dmel_FBpp0111901 Ehux_41894 Falb_H696_00438T0	Falb_H696_00621T0	Falb_H696_03655T0 Hsap_ENSP00000180173	Hsap_ENSP00000221086	Hsap_ENSP00000325285	Hsap_ENSP00000345752	Hsap_ENSP00000359423
OG0000247 Acas_g15334	Acas_g3188	Acas_g3312	Acas_g5405	Acas_g6394	Acas_g6972	Acas_g8762 Aque_XP_003385580	Aque_XP_003385581	Aque_XP_003386404	Aque_XP_003388272 Atha_AT1G49710	Atha_AT1G71990	Atha_AT3G19280 Awhi_Unigene26170_m16297 Cang_39682	Cang_53390 Cfra_0941T1	Cfra_2227T1	Cfra_6400T1 Clim_g3221	Clim_g6150 Nk52_evm15s418 Ddis_XP_628977	Ddis_XP_637507	Ddis_XP_638398	Ddis_XP_638529	Ddis_XP_638532	Ddis_XP_638533	Ddis_XP_638553	Ddis_XP_639141	Ddis_XP_644000	Ddis_XP_647625 Dmel_FBpp0072577	Dmel_FBpp0075394	Dmel_FBpp0079411 Ehux_116426 Falb_H696_01677T0 Hsap_ENSP00000252675	Hsap_ENSP00000302599	Hsap_ENSP00000305603	Hsap_ENSP00000318142	Hsap_ENSP00000344210	Hsap_ENSP00000351602	Hsap_ENSP00000361932	Hsap_ENSP00000369421 Ihof_5518	Ihof_7949 Mver_02135	Mver_02883	Mver_04616	Mver_06260	Mver_10304 Mvib_comp12783_c0_seq1_m20445	Mvib_comp12783_c0_seq2_m20448	Mvib_comp13764_c0_seq1_m24979	Mvib_comp14658_c0_seq1_m29768	Mvib_comp2036_c0_seq1_m820	Mvib_comp2995_c0_seq1_m1003	Mvib_comp7161_c0_seq1_m5226	Mvib_comp8671_c0_seq1_m8178 Ngru_XP_002670830	Ngru_XP_002670839	Ngru_XP_002670917	Ngru_XP_002670919	Ngru_XP_002670956
OG0000248 Acas_g10609	Acas_g12205	Acas_g17700	Acas_g7366 Aque_XP_003383265	Aque_XP_003384087	Aque_XP_003389696	Aque_XP_003391997 Atha_AT1G04710	Atha_AT2G33150	Atha_AT5G47720	Atha_AT5G48230	Atha_AT5G48880 Awhi_Unigene17340_m11125	Awhi_Unigene17546_m11389	Awhi_Unigene18342_m12347	Awhi_Unigene33797_m20956	Awhi_Unigene34503_m21534	Awhi_Unigene36130_m23286	Awhi_Unigene4980_m3179 Cang_116610	Cang_127283	Cang_43509	Cang_51051 Cfra_0754T1	Cfra_1357T1	Cfra_2614T1	Cfra_8195T1 Clim_g245	Clim_g3248	Clim_g3776	Clim_g5831	Clim_g5867 Cowc_CAOG_00009	Cowc_CAOG_02587	Cowc_CAOG_05953	Cowc_CAOG_07853 Nk52_evm45s2579	Nk52_evm7s281	Nk52_evm9s235 Ddis_XP_643924	Ddis_XP_645587	Ddis_XP_646095 Dmel_FBpp0071095	Dmel_FBpp0072560	Dmel_FBpp0079472 Ehux_429040	Ehux_435400 Falb_H696_03137T0	Falb_H696_04278T0	Falb_H696_04457T0	Falb_H696_04601T0 Hsap_ENSP00000265838	Hsap_ENSP00000285093	Hsap_ENSP00000333664	Hsap_ENSP00000437850 Ihof_1125	Ihof_3489	Ihof_9999 Mlei_ML04282a	Mlei_ML051317a	Mlei_ML271513a Mver_00594	Mver_02032	Mver_03341	Mver_04796
OG0000249 Acas_g1054	Acas_g10656	Acas_g11560	Acas_g11871	Acas_g13281	Acas_g14239	Acas_g3082	Acas_g3706	Acas_g3749	Acas_g688	Acas_g707 Atha_AT1G55590	Atha_AT1G80570	Atha_AT2G17020	Atha_AT2G25490	Atha_AT3G07550	Atha_AT5G01720	Atha_AT5G23340	Atha_AT5G25350 Awhi_Unigene11591_m7576	Awhi_Unigene20284_m13910	Awhi_Unigene24301_m15853	Awhi_Unigene34740_m21795	Awhi_Unigene35345_m22434 Cang_118270	Cang_211172	Cang_382052	Cang_78031 Cfra_1548T1 Clim_g4359	Clim_g5251	Clim_g5446 Cowc_CAOG_04314	Cowc_CAOG_07625 Nk52_evm1s331	Nk52_evm32s208	Nk52_evm87s485	Nk52_evm89s226 Ddis_XP_629174	Ddis_XP_638349	Ddis_XP_638556	Ddis_XP_642160	Ddis_XP_647378 Dmel_FBpp0073740	Dmel_FBpp0078693	Dmel_FBpp0082374 Ehux_200710 Falb_H696_03981T0 Hsap_ENSP00000229971 Ihof_170	Ihof_2676 Mlei_ML03808a	Mlei_ML040030a	Mlei_ML04343a	Mlei_ML089418a	Mlei_ML210013a	Mlei_ML27156a Mver_00045	Mver_02642	Mver_03216	Mver_04209	Mver_04958	Mver_07473	Mver_08198	Mver_09646
OG0000250 Acas_g13068	Acas_g16216	Acas_g3613	Acas_g9563 Aque_XP_003383255	Aque_XP_003384070	Aque_XP_003389290 Atha_AT1G55810	Atha_AT3G27190	Atha_AT3G27440	Atha_AT3G53900	Atha_AT4G26510	Atha_AT5G40870 Awhi_Unigene2826_m2036	Awhi_Unigene34653_m21694	Awhi_Unigene34892_m21962	Awhi_Unigene6899_m3877 Cang_31970	Cang_35734	Cang_35753	Cang_55012	Cang_55789	Cang_57462	Cang_86533 Cfra_0570T1	Cfra_7545T1	Cfra_7619T1 Clim_g1661	Clim_g3487	Clim_g571	Clim_g5874 Cowc_CAOG_02234	Cowc_CAOG_03825	Cowc_CAOG_05088	Cowc_CAOG_05712 Nk52_evm1s1077	Nk52_evm2s296	Nk52_evm43s210 Ddis_XP_644025	Ddis_XP_647007	Ddis_XP_647128 Dmel_FBpp0076818	Dmel_FBpp0086069	Dmel_FBpp0288805 Ehux_427275	Ehux_429946	Ehux_445511	Ehux_64340	Ehux_fgenesh_newKGs_kg_76__48__jgi Falb_H696_02644T0	Falb_H696_02645T0	Falb_H696_02702T0	Falb_H696_04963T0 Hsap_ENSP00000346155	Hsap_ENSP00000356853	Hsap_ENSP00000361285	Hsap_ENSP00000362481 Ihof_10264	Ihof_175	Ihof_4529	Ihof_5321	Ihof_6859 Mlei_ML00524a	Mlei_ML07426a	Mlei_ML289711a
OG0000251 Acas_g12968	Acas_g4041	Acas_g8553 Aque_XP_003382809	Aque_XP_003386055	Aque_XP_003387183	Aque_XP_003387185 Atha_AT1G04820	Atha_AT1G64740	Atha_AT4G14960	Atha_AT5G19780 Awhi_Unigene17439_m11253	Awhi_Unigene33347_m20760 Cang_135121	Cang_72621 Cfra_2895T1 Clim_g1064 Cowc_CAOG_06901 Nk52_evm149s226 Ddis_XP_637058	Ddis_XP_640483 Dmel_FBpp0076122	Dmel_FBpp0081062	Dmel_FBpp0081153	Dmel_FBpp0081565 Ehux_104197	Ehux_116863	Ehux_200410	Ehux_254823	Ehux_311254	Ehux_318009	Ehux_415405	Ehux_416424	Ehux_445562	Ehux_78701 Falb_H696_01409T0 Hsap_ENSP00000248437	Hsap_ENSP00000301071	Hsap_ENSP00000318197	Hsap_ENSP00000326042	Hsap_ENSP00000336799	Hsap_ENSP00000369784	Hsap_ENSP00000412646	Hsap_ENSP00000443475 Ihof_1739 Mlei_ML01482a	Mlei_ML021133a	Mlei_ML026516a	Mlei_ML056958a	Mlei_ML06742a	Mlei_ML085213a	Mlei_ML10374a	Mlei_ML10375a	Mlei_ML10376a	Mlei_ML10942a	Mlei_ML154172a	Mlei_ML174731a	Mlei_ML20831a	Mlei_ML234515a Mver_05006	Mver_11989	Mver_11994 Mvib_comp15467_c0_seq1_m35413	Mvib_comp15467_c0_seq2_m35417 Ngru_XP_002670875	Ngru_XP_002675064	Ngru_XP_002677064	Ngru_XP_002678201
OG0000252 Acas_g10429	Acas_g12210	Acas_g6631	Acas_g7545 Aque_XP_003382979	Aque_XP_003383779 Atha_AT1G10360	Atha_AT1G10370	Atha_AT1G17170	Atha_AT1G17180	Atha_AT1G17190	Atha_AT1G27130	Atha_AT1G27140	Atha_AT1G53680	Atha_AT1G59670	Atha_AT1G59700	Atha_AT1G69920	Atha_AT1G69930	Atha_AT1G74590	Atha_AT1G78320	Atha_AT1G78340	Atha_AT1G78360	Atha_AT1G78370	Atha_AT1G78380	Atha_AT2G02380	Atha_AT2G02390	Atha_AT2G29420	Atha_AT2G29440	Atha_AT2G29450	Atha_AT2G29460	Atha_AT2G29470	Atha_AT2G29480	Atha_AT2G29490	Atha_AT3G09270	Atha_AT3G43800	Atha_AT3G55040	Atha_AT5G02780	Atha_AT5G02790	Atha_AT5G62480 Awhi_Unigene16638_m10355	Awhi_Unigene9430_m6617 Cang_125288	Cang_28419	Cang_49941	Cang_67351 Cfra_8202T1 Clim_g4317	Clim_g6318 Cowc_CAOG_00139 Nk52_evm20s1524 Ddis_XP_642170 Dmel_FBpp0076348	Dmel_FBpp0076349	Dmel_FBpp0076376	Dmel_FBpp0076378	Dmel_FBpp0081520	Dmel_FBpp0081522 Ehux_115873	Ehux_195676	Ehux_218345	Ehux_218558
OG0000253 Acas_g12300	Acas_g13408	Acas_g13538	Acas_g18331	Acas_g8227	Acas_g9625 Aque_XP_003389619	Aque_XP_003390114 Atha_AT1G12570	Atha_AT1G14185	Atha_AT1G14190	Atha_AT1G72970	Atha_AT1G73050	Atha_AT3G56060	Atha_AT5G51930	Atha_AT5G51950 Awhi_Unigene20926_m14509	Awhi_Unigene32558_m19995 Cfra_1190T1 Clim_g4335	Clim_g4336	Clim_g4337	Clim_g5294	Clim_g5295 Cowc_CAOG_03138 Ddis_XP_001733023 Dmel_FBpp0073791	Dmel_FBpp0073792	Dmel_FBpp0073793	Dmel_FBpp0073795	Dmel_FBpp0073796	Dmel_FBpp0073797	Dmel_FBpp0073799	Dmel_FBpp0073800	Dmel_FBpp0073801	Dmel_FBpp0073802	Dmel_FBpp0073803	Dmel_FBpp0073804	Dmel_FBpp0081114	Dmel_FBpp0081880	Dmel_FBpp0084360 Ehux_115992	Ehux_195271	Ehux_237974	Ehux_249893	Ehux_426209	Ehux_441720	Ehux_463443	Ehux_467417	Ehux_77319 Hsap_ENSP00000319851 Mlei_ML00533a	Mlei_ML02606a	Mlei_ML34752a Mver_01778	Mver_01779	Mver_01799	Mver_01800	Mver_01801	Mver_01802	Mver_01803	Mver_08821 Ngru_XP_002670489
OG0000254 Acas_g12024 Aque_XP_003388255	Aque_XP_003389069 Atha_AT1G32330	Atha_AT1G46264	Atha_AT1G67970	Atha_AT1G77570	Atha_AT2G26150	Atha_AT2G41690	Atha_AT3G02990	Atha_AT3G22830	Atha_AT3G24520	Atha_AT3G51910	Atha_AT3G63350	Atha_AT4G11660	Atha_AT4G13980	Atha_AT4G17750	Atha_AT4G18870	Atha_AT4G18880	Atha_AT4G19630	Atha_AT4G36990	Atha_AT5G03720	Atha_AT5G16820	Atha_AT5G43840	Atha_AT5G45710	Atha_AT5G54070	Atha_AT5G62020 Awhi_Unigene35454_m22546	Awhi_Unigene35455_m22547	Awhi_Unigene35456_m22548	Awhi_Unigene37914_m24609 Cang_102584	Cang_117939	Cang_125509	Cang_126480	Cang_98945	Cang_99622 Cfra_3163T1	Cfra_4294T1	Cfra_8176T1 Clim_g224	Clim_g303	Clim_g3321	Clim_g3322	Clim_g3850	Clim_g7039	Clim_g828 Cowc_CAOG_00281	Cowc_CAOG_05916	Cowc_CAOG_06646 Nk52_evm13s163	Nk52_evm70s158 Ddis_XP_640855 Dmel_FBpp0110266 Ehux_103206	Ehux_125420	Ehux_224105	Ehux_248778	Ehux_436317	Ehux_464192	Ehux_464822
OG0000255 Acas_g651	Acas_g6985	Acas_g8436	Acas_g9388 Aque_XP_003383128	Aque_XP_003385012 Atha_AT1G64550	Atha_AT3G54540	Atha_AT5G60790 Awhi_Unigene1030_m991	Awhi_Unigene18062_m12017	Awhi_Unigene23017_m15293	Awhi_Unigene621_m594	Awhi_Unigene8738_m5936	Awhi_Unigene9129_m6425 Cang_126248	Cang_129335	Cang_47300 Cfra_0639T1	Cfra_2013T1	Cfra_4403T1	Cfra_4470T1	Cfra_5119T1	Cfra_8056T1 Clim_g4874	Clim_g5205	Clim_g6068	Clim_g6468 Cowc_CAOG_02674	Cowc_CAOG_03000	Cowc_CAOG_04269	Cowc_CAOG_04599 Nk52_evm11s136	Nk52_evm12s96	Nk52_evm25s153	Nk52_evm28s224 Ddis_XP_637946	Ddis_XP_638739	Ddis_XP_647476 Dmel_FBpp0073367	Dmel_FBpp0073872	Dmel_FBpp0074708 Ehux_112089	Ehux_113060	Ehux_41348	Ehux_430796	Ehux_451786	Ehux_456686	Ehux_460993	Ehux_463753	Ehux_466207	Ehux_51545	Ehux_68429 Falb_H696_00574T0	Falb_H696_05553T0	Falb_H696_06031T0 Hsap_ENSP00000222388	Hsap_ENSP00000313603	Hsap_ENSP00000411471 Ihof_156	Ihof_2091	Ihof_3562	Ihof_8263 Mlei_ML005326a	Mlei_ML01825a
OG0000256 Acas_g10543	Acas_g13010	Acas_g3416	Acas_g4697	Acas_g5000	Acas_g729	Acas_g8801 Aque_XP_003385701	Aque_XP_003385702	Aque_XP_003388021 Atha_AT1G26340	Atha_AT1G60660	Atha_AT2G32720	Atha_AT2G46650	Atha_AT5G09680	Atha_AT5G48810	Atha_AT5G53560 Awhi_Unigene13300_m8639	Awhi_Unigene17001_m10747	Awhi_Unigene33393_m20812	Awhi_Unigene7778_m4871 Cang_37287	Cang_81013 Cfra_4922T1	Cfra_6045T1 Clim_g1439	Clim_g4641 Cowc_CAOG_00355	Cowc_CAOG_05367	Cowc_CAOG_06337	Cowc_CAOG_06628 Nk52_evm14s163	Nk52_evm89s207 Ddis_XP_635601	Ddis_XP_641134	Ddis_XP_641915	Ddis_XP_642451	Ddis_XP_642935	Ddis_XP_643358	Ddis_XP_643535	Ddis_XP_643728	Ddis_XP_646005	Ddis_XP_646610 Dmel_FBpp0075245	Dmel_FBpp0080542	Dmel_FBpp0085713	Dmel_FBpp0087979	Dmel_FBpp0088809 Ehux_103141	Ehux_236634	Ehux_351238	Ehux_359352	Ehux_368897	Ehux_455000	Ehux_49137	Ehux_60965	Ehux_65915 Falb_H696_02795T0	Falb_H696_04245T0	Falb_H696_04342T0 Hsap_ENSP00000308430	Hsap_ENSP00000341625	Hsap_ENSP00000358695 Ihof_4677
OG0000257 Acas_g10204	Acas_g12721	Acas_g16682	Acas_g17088	Acas_g5495 Aque_XP_003385061	Aque_XP_003386067	Aque_XP_003386068	Aque_XP_003386070	Aque_XP_003389373	Aque_XP_003389778	Aque_XP_003391472 Atha_AT1G09480	Atha_AT1G09490	Atha_AT1G09500	Atha_AT1G09510	Atha_AT1G15950	Atha_AT1G25460	Atha_AT1G51410	Atha_AT1G61720	Atha_AT1G66800	Atha_AT1G68540	Atha_AT1G76470	Atha_AT1G80820	Atha_AT2G02400	Atha_AT2G23910	Atha_AT2G33590	Atha_AT2G33600	Atha_AT2G45400	Atha_AT4G27250	Atha_AT4G30470	Atha_AT4G35420	Atha_AT5G19440	Atha_AT5G42800	Atha_AT5G58490 Awhi_Unigene19181_m12896	Awhi_Unigene1927_m1345	Awhi_Unigene1928_m1346	Awhi_Unigene1929_m1347	Awhi_Unigene1930_m1348	Awhi_Unigene1931_m1349	Awhi_Unigene1932_m1350	Awhi_Unigene1933_m1351	Awhi_Unigene1934_m1353	Awhi_Unigene20138_m13785	Awhi_Unigene29947_m18434	Awhi_Unigene33177_m20585	Awhi_Unigene34417_m21449	Awhi_Unigene8224_m5373 Cfra_0724T1	Cfra_1533T1	Cfra_6525T1 Clim_g5105	Clim_g6749	Clim_g6792 Cowc_CAOG_03222
OG0000258 Atha_AT1G73020 Awhi_Unigene2563_m1835	Awhi_Unigene2878_m2075	Awhi_Unigene32982_m20387	Awhi_Unigene40425_m25855	Awhi_Unigene5066_m3204 Cfra_8178T1 Clim_g1070	Clim_g1416	Clim_g3560	Clim_g5982	Clim_g6071 Cowc_CAOG_05555 Nk52_evm17s684	Nk52_evm28s238	Nk52_evm3s495	Nk52_evm52s152	Nk52_evm8s352 Ddis_XP_647283 Dmel_FBpp0074146	Dmel_FBpp0080263	Dmel_FBpp0112944	Dmel_FBpp0288570	Dmel_FBpp0291654 Ehux_110008	Ehux_124024	Ehux_211263	Ehux_222464	Ehux_254399	Ehux_260694	Ehux_367742	Ehux_414306	Ehux_458408	Ehux_465519	Ehux_470289 Hsap_ENSP00000159087	Hsap_ENSP00000256737	Hsap_ENSP00000274979	Hsap_ENSP00000292246	Hsap_ENSP00000315371	Hsap_ENSP00000332788	Hsap_ENSP00000347454	Hsap_ENSP00000376703	Hsap_ENSP00000409126	Hsap_ENSP00000437754 Mlei_ML02304a	Mlei_ML032912a	Mlei_ML032913a	Mlei_ML09867a	Mlei_ML102221a	Mlei_ML114620a	Mlei_ML114622a	Mlei_ML11596a	Mlei_ML139715a	Mlei_ML17218a	Mlei_ML18238a	Mlei_ML227811a	Mlei_ML25641a	Mlei_ML274443a	Mlei_ML36939a
OG0000259 Acas_g13419	Acas_g16196	Acas_g5660	Acas_g9457 Aque_XP_003384684	Aque_XP_003389664	Aque_XP_003389955	Aque_XP_003390201	Aque_XP_003390521	Aque_XP_003391127 Atha_AT1G31180	Atha_AT1G32480	Atha_AT1G80555	Atha_AT1G80560	Atha_AT2G17130	Atha_AT3G09810	Atha_AT4G35260	Atha_AT4G35650	Atha_AT5G03290	Atha_AT5G14200 Awhi_Unigene16905_m10657	Awhi_Unigene8926_m6171 Cang_104443	Cang_129212	Cang_39473	Cang_73167	Cang_98552 Cfra_0192T1	Cfra_6323T1 Clim_g1953	Clim_g3201	Clim_g7025	Clim_g7026 Cowc_CAOG_03897	Cowc_CAOG_04518	Cowc_CAOG_07017 Nk52_evm3s346	Nk52_evm8s2426	Nk52_evm9s2356 Ddis_XP_628920	Ddis_XP_645630 Dmel_FBpp0072200	Dmel_FBpp0074550	Dmel_FBpp0076311	Dmel_FBpp0083588	Dmel_FBpp0084275 Ehux_259018	Ehux_468689	Ehux_54130 Falb_H696_01085T0	Falb_H696_05369T0 Hsap_ENSP00000217901	Hsap_ENSP00000299518	Hsap_ENSP00000370223 Ihof_5155	Ihof_920 Mlei_ML07699a	Mlei_ML35706a Mver_01067	Mver_01846	Mver_02912	Mver_05450 Mvib_comp11212_c0_seq1_m14800	Mvib_comp13052_c0_seq1_m21715 Ngru_XP_002673738	Ngru_XP_002674910	Ngru_XP_002677147 Nvec_XP_001617420	Nvec_XP_001617531
OG0000260 Acas_g10664 Aque_XP_003384436	Aque_XP_003387611	Aque_XP_003391785 Ddis_XP_638911 Dmel_FBpp0072842	Dmel_FBpp0074395	Dmel_FBpp0075329	Dmel_FBpp0075331	Dmel_FBpp0075334	Dmel_FBpp0077211	Dmel_FBpp0077212	Dmel_FBpp0078663	Dmel_FBpp0080202	Dmel_FBpp0084684	Dmel_FBpp0086258	Dmel_FBpp0086464	Dmel_FBpp0088130	Dmel_FBpp0099799 Ehux_365849	Ehux_432999	Ehux_442480 Falb_H696_05655T0	Falb_H696_06363T0 Hsap_ENSP00000227756	Hsap_ENSP00000252318	Hsap_ENSP00000259056	Hsap_ENSP00000265000	Hsap_ENSP00000269195	Hsap_ENSP00000297107	Hsap_ENSP00000314500	Hsap_ENSP00000315835	Hsap_ENSP00000329654	Hsap_ENSP00000329846	Hsap_ENSP00000336729	Hsap_ENSP00000344260	Hsap_ENSP00000348668	Hsap_ENSP00000355632	Hsap_ENSP00000364150	Hsap_ENSP00000376465	Hsap_ENSP00000376548	Hsap_ENSP00000387239	Hsap_ENSP00000423313	Hsap_ENSP00000436604	Hsap_ENSP00000446025	Hsap_ENSP00000447852 Mlei_ML002127a	Mlei_ML002134a	Mlei_ML005331a	Mlei_ML006935a	Mlei_ML007412a	Mlei_ML014016a	Mlei_ML056911a	Mlei_ML056918a	Mlei_ML056920a	Mlei_ML05792a	Mlei_ML06554a
OG0000261 Cowc_CAOG_04549 Dmel_FBpp0070689	Dmel_FBpp0073933	Dmel_FBpp0074905	Dmel_FBpp0074983	Dmel_FBpp0076261	Dmel_FBpp0081946	Dmel_FBpp0083198	Dmel_FBpp0085128	Dmel_FBpp0087341	Dmel_FBpp0099401	Dmel_FBpp0099473	Dmel_FBpp0290450 Ehux_201085	Ehux_207486	Ehux_224844	Ehux_230481	Ehux_421367	Ehux_450304 Hsap_ENSP00000023897	Hsap_ENSP00000218075	Hsap_ENSP00000264318	Hsap_ENSP00000264428	Hsap_ENSP00000265294	Hsap_ENSP00000274093	Hsap_ENSP00000274545	Hsap_ENSP00000274547	Hsap_ENSP00000295452	Hsap_ENSP00000295454	Hsap_ENSP00000331912	Hsap_ENSP00000335592	Hsap_ENSP00000359329	Hsap_ENSP00000359334	Hsap_ENSP00000359353	Hsap_ENSP00000361700	Hsap_ENSP00000365530	Hsap_ENSP00000367848	Hsap_ENSP00000386029	Hsap_ENSP00000410732	Hsap_ENSP00000411593	Hsap_ENSP00000412673	Hsap_ENSP00000420790	Hsap_ENSP00000427603	Hsap_ENSP00000442408 Nvec_XP_001617417	Nvec_XP_001619374	Nvec_XP_001620662	Nvec_XP_001621295	Nvec_XP_001622147	Nvec_XP_001624301	Nvec_XP_001624303	Nvec_XP_001626754	Nvec_XP_001626792	Nvec_XP_001626990
OG0000262 Acas_g1184	Acas_g15432	Acas_g4898	Acas_g5043	Acas_g5053	Acas_g5882	Acas_g6775	Acas_g9606 Aque_XP_003383716	Aque_XP_003384488	Aque_XP_003387269 Atha_AT1G01460	Atha_AT1G10900	Atha_AT1G21980	Atha_AT1G60890	Atha_AT1G77740	Atha_AT2G26420	Atha_AT2G41210	Atha_AT3G07960	Atha_AT3G09920	Atha_AT3G56960	Atha_AT4G01190 Awhi_Unigene16731_m10470	Awhi_Unigene2674_m1925	Awhi_Unigene28439_m17121	Awhi_Unigene31719_m19163	Awhi_Unigene33406_m20827	Awhi_Unigene41581_m26515	Awhi_Unigene8668_m5861	Awhi_Unigene9576_m6671 Cang_101062	Cang_129439	Cang_154888 Cfra_0146T1	Cfra_0889T1	Cfra_1663T1 Clim_g2430	Clim_g6658 Cowc_CAOG_00062	Cowc_CAOG_02189	Cowc_CAOG_08653 Nk52_evm47s78 Ddis_XP_629858	Ddis_XP_638982	Ddis_XP_641291	Ddis_XP_643612	Ddis_XP_647148 Dmel_FBpp0071491	Dmel_FBpp0099992	Dmel_FBpp0288533 Ehux_209431	Ehux_249031	Ehux_417169	Ehux_436198	Ehux_455689 Falb_H696_04887T0 Hsap_ENSP00000269554	Hsap_ENSP00000347032	Hsap_ENSP00000357883	Hsap_ENSP00000365757	Hsap_ENSP00000373399	Hsap_ENSP00000435778	Hsap_ENSP00000444779 Ihof_5989
OG0000263 Acas_g10440	Acas_g6735	Acas_g797	Acas_g9025 Aque_XP_003383260	Aque_XP_003385066 Atha_AT1G31240	Atha_AT1G49170	Atha_AT2G19260	Atha_AT3G02160	Atha_AT4G34340	Atha_AT5G15570	Atha_AT5G61220 Awhi_Unigene1920_m1341	Awhi_Unigene28342_m17024	Awhi_Unigene28343_m17027 Cang_40000 Cfra_3942T1	Cfra_4049T1	Cfra_5461T1 Clim_g5303	Clim_g550	Clim_g5557 Cowc_CAOG_03637	Cowc_CAOG_05570	Cowc_CAOG_07408 Nk52_evm8s1524	Nk52_evm8s2152 Ddis_XP_635573	Ddis_XP_638088	Ddis_XP_641026 Dmel_FBpp0070415	Dmel_FBpp0072970	Dmel_FBpp0074239	Dmel_FBpp0074288	Dmel_FBpp0078055	Dmel_FBpp0088179 Ehux_198275	Ehux_354343	Ehux_374446 Falb_H696_02134T0	Falb_H696_03493T0	Falb_H696_05010T0 Hsap_ENSP00000283478	Hsap_ENSP00000324228	Hsap_ENSP00000340271	Hsap_ENSP00000348145	Hsap_ENSP00000362073	Hsap_ENSP00000382455	Hsap_ENSP00000382616	Hsap_ENSP00000383435	Hsap_ENSP00000403393	Hsap_ENSP00000403987	Hsap_ENSP00000405319	Hsap_ENSP00000414891	Hsap_ENSP00000416289	Hsap_ENSP00000426826	Hsap_ENSP00000428148	Hsap_ENSP00000437610	Hsap_ENSP00000437621	Hsap_ENSP00000438234	Hsap_ENSP00000443900	Hsap_ENSP00000446969
OG0000264 Acas_g10989	Acas_g13540	Acas_g13542	Acas_g1503	Acas_g15625	Acas_g15672	Acas_g16823	Acas_g2457	Acas_g3657	Acas_g4201	Acas_g4506	Acas_g6132 Aque_XP_003382870	Aque_XP_003383713	Aque_XP_003384309	Aque_XP_003385375 Atha_AT2G18730	Atha_AT2G20900	Atha_AT4G28130	Atha_AT4G30340	Atha_AT5G07920	Atha_AT5G57690	Atha_AT5G63770 Awhi_Unigene24030_m15734	Awhi_Unigene2585_m1853	Awhi_Unigene26757_m16458	Awhi_Unigene29425_m17956	Awhi_Unigene32944_m20348	Awhi_Unigene32945_m20349	Awhi_Unigene34655_m21695 Cfra_1595T1	Cfra_4820T1	Cfra_8425T1 Clim_g6114	Clim_g6285	Clim_g7008 Cowc_CAOG_00054	Cowc_CAOG_00750	Cowc_CAOG_01047	Cowc_CAOG_07051 Nk52_evm14s1444	Nk52_evm1s223	Nk52_evm4s1315 Ddis_XP_642726 Dmel_FBpp0083885	Dmel_FBpp0086966	Dmel_FBpp0111492	Dmel_FBpp0111537	Dmel_FBpp0291800 Ehux_107703	Ehux_108647	Ehux_231086 Falb_H696_03008T0 Hsap_ENSP00000258767	Hsap_ENSP00000264057	Hsap_ENSP00000265022	Hsap_ENSP00000273814	Hsap_ENSP00000284061	Hsap_ENSP00000328405	Hsap_ENSP00000337572	Hsap_ENSP00000396078	Hsap_ENSP00000412178 Ihof_1858
OG0000265 Aque_XP_003382960	Aque_XP_003385019	Aque_XP_003386496	Aque_XP_003386775	Aque_XP_003387268	Aque_XP_003389346	Aque_XP_003389375	Aque_XP_003389648	Aque_XP_003389732	Aque_XP_003389890	Aque_XP_003389956	Aque_XP_003390178	Aque_XP_003390249	Aque_XP_003390393	Aque_XP_003391006	Aque_XP_003392100 Atha_AT2G13770	Atha_AT3G19120	Atha_AT3G55350	Atha_AT3G63270	Atha_AT4G29780	Atha_AT5G12010 Nk52_evm16s2485	Nk52_evm1s2580	Nk52_evm22s358	Nk52_evm27s32	Nk52_evm2s397	Nk52_evm39s221 Dmel_FBpp0074935	Dmel_FBpp0075809	Dmel_FBpp0076532	Dmel_FBpp0079738 Hsap_ENSP00000317743 Mlei_ML12362a	Mlei_ML12691a	Mlei_ML12865a	Mlei_ML18251a	Mlei_ML18781a	Mlei_ML189332a	Mlei_ML21807a	Mlei_ML21808a	Mlei_ML21896a	Mlei_ML45538a Mver_01156	Mver_01808	Mver_03295	Mver_08657 Nvec_XP_001624370	Nvec_XP_001628488	Nvec_XP_001630047	Nvec_XP_001630048	Nvec_XP_001631582	Nvec_XP_001633572	Nvec_XP_001634002 Pyez_10651_g2541	Pyez_10795_g2575	Pyez_12588_g3015	Pyez_13744_g3310
OG0000266 Aque_XP_003391018 Cowc_CAOG_08382	Cowc_CAOG_08399	Cowc_CAOG_08411	Cowc_CAOG_08517	Cowc_CAOG_08667	Cowc_CAOG_08786	Cowc_CAOG_08841	Cowc_CAOG_08842	Cowc_CAOG_08901	Cowc_CAOG_08904	Cowc_CAOG_08905	Cowc_CAOG_08911	Cowc_CAOG_08947	Cowc_CAOG_08963	Cowc_CAOG_08983	Cowc_CAOG_09018	Cowc_CAOG_09020	Cowc_CAOG_09039	Cowc_CAOG_09047	Cowc_CAOG_09066	Cowc_CAOG_09071	Cowc_CAOG_09073	Cowc_CAOG_09081	Cowc_CAOG_09119	Cowc_CAOG_09190	Cowc_CAOG_09194	Cowc_CAOG_09205	Cowc_CAOG_09225	Cowc_CAOG_09229	Cowc_CAOG_09246 Dmel_FBpp0081764	Dmel_FBpp0086077 Mver_01182	Mver_11301 Nvec_XP_001619706	Nvec_XP_001623205	Nvec_XP_001636217 Pyez_10006_g2391	Pyez_1142_g147	Pyez_1144_g148	Pyez_1146_g152	Pyez_1147_g153	Pyez_12286_g2938	Pyez_12534_g3002	Pyez_12549_g3005	Pyez_14034_g3372	Pyez_14251_g3413	Pyez_14252_g3414	Pyez_1606_g248	Pyez_1607_g249	Pyez_1611_g250	Pyez_16983_g4126	Pyez_17773_g4360	Pyez_18190_g4454
OG0000267 Acas_g206	Acas_g2678	Acas_g3081 Aque_XP_003387192	Aque_XP_003387850 Atha_AT5G17690 Cang_125535	Cang_36989	Cang_392096	Cang_56529	Cang_57185 Cowc_CAOG_06813 Nk52_evm57s151 Ddis_XP_628751	Ddis_XP_639297	Ddis_XP_639321	Ddis_XP_646233	Ddis_XP_646612	Ddis_XP_647578 Dmel_FBpp0071221	Dmel_FBpp0074258	Dmel_FBpp0074441	Dmel_FBpp0077134	Dmel_FBpp0078059	Dmel_FBpp0079251	Dmel_FBpp0081494	Dmel_FBpp0083702	Dmel_FBpp0086055	Dmel_FBpp0086056 Ehux_101378	Ehux_111778	Ehux_112668	Ehux_113864	Ehux_114394	Ehux_114853	Ehux_116082	Ehux_116260	Ehux_117193	Ehux_194097	Ehux_194308	Ehux_212311	Ehux_213551	Ehux_223706	Ehux_224016	Ehux_230451	Ehux_231803	Ehux_233671	Ehux_235215	Ehux_238129	Ehux_245930	Ehux_250609	Ehux_252527	Ehux_442952	Ehux_451964	Ehux_60835	Ehux_94876	Ehux_95157	Ehux_99581 Hsap_ENSP00000209875
OG0000268 Acas_g13283	Acas_g1362	Acas_g1737	Acas_g2941	Acas_g3325 Aque_XP_003382844	Aque_XP_003382845 Atha_AT4G21534	Atha_AT4G21540	Atha_AT5G23450	Atha_AT5G51290 Awhi_Unigene12152_m7857	Awhi_Unigene19761_m13447	Awhi_Unigene20077_m13726	Awhi_Unigene28304_m16995	Awhi_Unigene29348_m17884	Awhi_Unigene29349_m17885 Cang_44955	Cang_56634	Cang_96589 Cfra_1337T1	Cfra_1746T1	Cfra_1908T1	Cfra_2729T1	Cfra_5723T1	Cfra_6696T1	Cfra_6790T1 Clim_g108	Clim_g1136	Clim_g3895	Clim_g6703 Cowc_CAOG_00068	Cowc_CAOG_02449	Cowc_CAOG_03528	Cowc_CAOG_04621	Cowc_CAOG_04886 Nk52_evm45s248	Nk52_evm4s236	Nk52_evm87s208 Ddis_XP_636269	Ddis_XP_638540	Ddis_XP_645126	Ddis_XP_645293 Dmel_FBpp0072854	Dmel_FBpp0073346	Dmel_FBpp0078446	Dmel_FBpp0079576 Ehux_207387	Ehux_246668	Ehux_253287	Ehux_437034 Falb_H696_00012T0	Falb_H696_00544T0 Hsap_ENSP00000216264	Hsap_ENSP00000313681	Hsap_ENSP00000341159	Hsap_ENSP00000347581	Hsap_ENSP00000413369 Ihof_1111	Ihof_2336	Ihof_331	Ihof_5483	Ihof_9180 Mlei_ML003011a	Mlei_ML03061a
OG0000269 Acas_g9739 Atha_AT4G19720	Atha_AT4G19730	Atha_AT4G19740	Atha_AT4G19750	Atha_AT4G19760	Atha_AT4G19770	Atha_AT4G19800	Atha_AT4G19810	Atha_AT4G19820 Awhi_Unigene14986_m9424	Awhi_Unigene15188_m9523	Awhi_Unigene1911_m1333	Awhi_Unigene21563_m14866	Awhi_Unigene37553_m24323	Awhi_Unigene5940_m3457 Cang_127499	Cang_36326	Cang_41065	Cang_49626	Cang_56796	Cang_58823	Cang_61763	Cang_66307 Clim_g4529	Clim_g5120 Cowc_CAOG_07823 Nk52_evm22s1837	Nk52_evm3s2152 Dmel_FBpp0071000	Dmel_FBpp0071328	Dmel_FBpp0071351	Dmel_FBpp0071463	Dmel_FBpp0071471	Dmel_FBpp0071472	Dmel_FBpp0071473	Dmel_FBpp0072677	Dmel_FBpp0072985	Dmel_FBpp0080417	Dmel_FBpp0080418	Dmel_FBpp0080419	Dmel_FBpp0082294	Dmel_FBpp0085849	Dmel_FBpp0086257	Dmel_FBpp0110419 Ehux_117626	Ehux_225160	Ehux_415154	Ehux_417127	Ehux_428951	Ehux_429900	Ehux_453682	Ehux_469375	Ehux_65231 Hsap_ENSP00000255409	Hsap_ENSP00000341828	Hsap_ENSP00000356198	Hsap_ENSP00000358743	Hsap_ENSP00000358763 Ihof_10170
OG0000270 Acas_g11534	Acas_g72 Aque_XP_003382968	Aque_XP_003387676 Awhi_Unigene17688_m11578	Awhi_Unigene4492_m3067	Awhi_Unigene6796_m3751 Cang_122976	Cang_142305 Cfra_0805T1 Clim_g2726	Clim_g5317	Clim_g868 Cowc_CAOG_03324	Cowc_CAOG_03512 Nk52_evm20s243	Nk52_evm39s1737	Nk52_evm5s2496	Nk52_evm7s553	Nk52_evm7s554 Ddis_XP_641686 Dmel_FBpp0087523	Dmel_FBpp0291777 Ehux_122577	Ehux_204296	Ehux_211369	Ehux_220103	Ehux_239613	Ehux_241189	Ehux_248202	Ehux_458992	Ehux_63702	Ehux_69788 Falb_H696_02495T0 Hsap_ENSP00000265563	Hsap_ENSP00000265717	Hsap_ENSP00000351410	Hsap_ENSP00000353415 Ihof_841	Ihof_885	Ihof_9169	Ihof_9269 Mlei_ML019228a	Mlei_ML13059a	Mlei_ML13939a	Mlei_ML41321a Mver_02159	Mver_05349 Mvib_comp11654_c0_seq1_m16392	Mvib_comp161814_c0_seq1_m45691	Mvib_comp16366_c0_seq1_m43420	Mvib_comp16431_c0_seq1_m43434	Mvib_comp3335_c0_seq1_m1373 Ngru_XP_002673919	Ngru_XP_002681660 Nvec_XP_001630325	Nvec_XP_001633226	Nvec_XP_001640502	Nvec_XP_001641597 Pgem_Unigene13025_Pirum_gemmatam8404	Pgem_Unigene1355_Pirum_gemmatam1061	Pgem_Unigene1521_Pirum_gemmatam1208	Pgem_Unigene15976_Pirum_gemmatam10159	Pgem_Unigene31759_Pirum_gemmatam19054	Pgem_Unigene7808_Pirum_gemmatam4822 Pyez_35754_g8554 Sarc4_g816T Sdes_comp15351_c0_seq1m4219	Sdes_comp15351_c0_seq2m4222	Sdes_comp15747_c0_seq1m4793	Sdes_comp16343_c0_seq2m5698	Sdes_comp16984_c0_seq1m6190
OG0000271 Acas_g1236	Acas_g13630	Acas_g3552	Acas_g7521	Acas_g7931	Acas_g9630 Aque_XP_003386373 Atha_AT1G54490	Atha_AT1G75660	Atha_AT5G42540 Awhi_Unigene23650_m15537	Awhi_Unigene28777_m17431	Awhi_Unigene7132_m4170	Awhi_Unigene8437_m5619 Cang_115720 Cfra_1074T1	Cfra_2793T1 Clim_g4225	Clim_g5025	Clim_g514 Cowc_CAOG_00921	Cowc_CAOG_04760	Cowc_CAOG_08797 Nk52_evm42s62	Nk52_evm4s311	Nk52_evm99s914 Ddis_XP_635977	Ddis_XP_643245	Ddis_XP_643964	Ddis_XP_644931	Ddis_XP_646407 Dmel_FBpp0078973	Dmel_FBpp0291292 Ehux_214690	Ehux_225049	Ehux_237027	Ehux_237497	Ehux_240649	Ehux_248396	Ehux_256782	Ehux_259680	Ehux_44839	Ehux_448662	Ehux_451138	Ehux_45174	Ehux_45463	Ehux_455108	Ehux_455347	Ehux_457414	Ehux_463440	Ehux_62942	Ehux_96362 Falb_H696_00262T0	Falb_H696_04505T0 Hsap_ENSP00000264951	Hsap_ENSP00000366396 Ihof_10364	Ihof_6025	Ihof_6519	Ihof_7053	Ihof_7426 Mlei_ML078943a	Mlei_ML28256a Mver_03789	Mver_08540	Mver_09077 Mvib_comp10315_c2_seq1_m12007
OG0000272 Acas_g11082	Acas_g12799	Acas_g15950	Acas_g3591 Aque_XP_003383287	Aque_XP_003383344	Aque_XP_003384945 Atha_AT3G11980	Atha_AT3G44540	Atha_AT3G44550	Atha_AT3G44560	Atha_AT3G56700	Atha_AT3G60060	Atha_AT4G33790	Atha_AT5G22420	Atha_AT5G22500 Awhi_Unigene2374_m1691 Cang_65753 Cfra_1389T1	Cfra_2993T1 Clim_g1061	Clim_g4289 Cowc_CAOG_01663	Cowc_CAOG_02487	Cowc_CAOG_05784	Cowc_CAOG_06474 Nk52_evm108s914	Nk52_evm42s2579	Nk52_evm43s2209 Ddis_XP_636393 Dmel_FBpp0070407	Dmel_FBpp0070789	Dmel_FBpp0072319	Dmel_FBpp0079296	Dmel_FBpp0082074	Dmel_FBpp0082779	Dmel_FBpp0082780	Dmel_FBpp0083231	Dmel_FBpp0083900	Dmel_FBpp0084271	Dmel_FBpp0084618	Dmel_FBpp0084714	Dmel_FBpp0086254	Dmel_FBpp0086266	Dmel_FBpp0087533	Dmel_FBpp0099966	Dmel_FBpp0271896	Dmel_FBpp0289308	Dmel_FBpp0290087 Falb_H696_02405T0	Falb_H696_03832T0	Falb_H696_04096T0 Hsap_ENSP00000182377	Hsap_ENSP00000265276	Hsap_ENSP00000346874	Hsap_ENSP00000352547	Hsap_ENSP00000355607 Ihof_9267 Mlei_ML09255a	Mlei_ML18931a Mver_00278	Mver_03715	Mver_03758	Mver_09231	Mver_11120
OG0000273 Acas_g10307	Acas_g10523	Acas_g15746	Acas_g3962	Acas_g5633	Acas_g7837 Aque_XP_003382454	Aque_XP_003383530	Aque_XP_003389173	Aque_XP_003392134 Atha_AT2G05590	Atha_AT4G34070	Atha_AT4G39870	Atha_AT5G06260 Awhi_Unigene13622_m8857	Awhi_Unigene33026_m20429	Awhi_Unigene7849_m4958 Cang_127607	Cang_134939	Cang_44547 Cfra_0523T1	Cfra_4464T1	Cfra_4567T1	Cfra_5429T1	Cfra_7728T1 Clim_g1869	Clim_g2555	Clim_g4640	Clim_g4910 Cowc_CAOG_04468	Cowc_CAOG_04525	Cowc_CAOG_04852	Cowc_CAOG_06336 Nk52_evm2s380	Nk52_evm36s914	Nk52_evm5s212	Nk52_evm88s207 Ddis_XP_629594	Ddis_XP_635716	Ddis_XP_636733	Ddis_XP_641162	Ddis_XP_642883 Dmel_FBpp0079093	Dmel_FBpp0080973	Dmel_FBpp0110233 Ehux_194125	Ehux_198863	Ehux_212633	Ehux_238357	Ehux_251755	Ehux_367352	Ehux_422189	Ehux_447864	Ehux_66705 Falb_H696_01511T0	Falb_H696_02471T0	Falb_H696_05794T0 Hsap_ENSP00000217320	Hsap_ENSP00000343635	Hsap_ENSP00000357341	Hsap_ENSP00000390106	Hsap_ENSP00000405424 Ihof_897	Ihof_9596 Mlei_ML006917a
OG0000274 Acas_g12647	Acas_g14184	Acas_g16188	Acas_g4104 Aque_XP_003382953	Aque_XP_003385379	Aque_XP_003387799	Aque_XP_003388739	Aque_XP_003390066 Atha_AT3G10050	Atha_AT4G11640 Awhi_Unigene12739_m8230	Awhi_Unigene13003_m8415	Awhi_Unigene19562_m13256	Awhi_Unigene19563_m13259	Awhi_Unigene28885_m17503	Awhi_Unigene42705_m27155	Awhi_Unigene7211_m4271	Awhi_Unigene7938_m5053	Awhi_Unigene7939_m5055	Awhi_Unigene7940_m5057 Cang_118709	Cang_38353	Cang_42338 Cfra_1762T1	Cfra_2207T1	Cfra_2452T1	Cfra_7210T1	Cfra_8305T1 Clim_g1030	Clim_g5067	Clim_g6075 Cowc_CAOG_04108	Cowc_CAOG_05372	Cowc_CAOG_07178 Nk52_evm1s2220	Nk52_evm23s2630	Nk52_evm35s234 Ddis_XP_636213	Ddis_XP_642753	Ddis_XP_644969 Dmel_FBpp0081504 Ehux_201607	Ehux_215130	Ehux_234247	Ehux_308811	Ehux_417175	Ehux_429609	Ehux_437196	Ehux_445176	Ehux_450038	Ehux_451356	Ehux_454560	Ehux_455163	Ehux_465191	Ehux_68889	Ehux_69724 Falb_H696_06384T0 Hsap_ENSP00000257549	Hsap_ENSP00000339435	Hsap_ENSP00000341117	Hsap_ENSP00000449061 Ihof_9940 Mlei_ML070250a	Mlei_ML19103a Mver_00941
OG0000275 Acas_g12937 Aque_XP_003382971	Aque_XP_003383279	Aque_XP_003391252 Atha_AT1G07790	Atha_AT1G08170	Atha_AT2G28720	Atha_AT2G37470	Atha_AT3G09480	Atha_AT3G45980	Atha_AT3G46030	Atha_AT3G53650	Atha_AT5G02570	Atha_AT5G22880	Atha_AT5G59910 Awhi_Unigene8287_m5448 Cang_122596	Cang_130450	Cang_50164	Cang_50174 Cfra_3584T1	Cfra_3671T1	Cfra_4822T1 Clim_g1810	Clim_g2357 Cowc_CAOG_01818	Cowc_CAOG_02250	Cowc_CAOG_02298 Nk52_evm13s282	Nk52_evm1s113	Nk52_evm1s1242	Nk52_evm1s2286	Nk52_evm1s2418 Ddis_XP_628972	Ddis_XP_637684 Dmel_FBpp0085281 Ehux_196782	Ehux_362583	Ehux_71444 Hsap_ENSP00000244601	Hsap_ENSP00000274764	Hsap_ENSP00000289316	Hsap_ENSP00000303408	Hsap_ENSP00000342886	Hsap_ENSP00000348706	Hsap_ENSP00000349430	Hsap_ENSP00000350580	Hsap_ENSP00000352442	Hsap_ENSP00000358151	Hsap_ENSP00000366618	Hsap_ENSP00000375736	Hsap_ENSP00000380177	Hsap_ENSP00000407461 Ihof_1187	Ihof_3167	Ihof_4962	Ihof_9171	Ihof_9243	Ihof_9349	Ihof_9727 Mver_00625	Mver_06988	Mver_09728 Mvib_comp15215_c0_seq1_m33393	Mvib_comp15215_c0_seq2_m33394
OG0000276 Aque_XP_003382559	Aque_XP_003384115	Aque_XP_003384116	Aque_XP_003384475	Aque_XP_003385151	Aque_XP_003385154	Aque_XP_003386419	Aque_XP_003391435	Aque_XP_003391549	Aque_XP_003391936 Awhi_Unigene11504_m7529	Awhi_Unigene22696_m15213	Awhi_Unigene2416_m1723	Awhi_Unigene28687_m17344	Awhi_Unigene897_m909 Nk52_evm18s96	Nk52_evm1s129	Nk52_evm1s2012	Nk52_evm1s2231	Nk52_evm1s2493	Nk52_evm1s608	Nk52_evm36s621	Nk52_evm37s621 Ehux_215744 Hsap_ENSP00000216361	Hsap_ENSP00000244728	Hsap_ENSP00000254898	Hsap_ENSP00000255132	Hsap_ENSP00000265379	Hsap_ENSP00000295550	Hsap_ENSP00000297848	Hsap_ENSP00000300527	Hsap_ENSP00000303153	Hsap_ENSP00000316030	Hsap_ENSP00000323077	Hsap_ENSP00000325146	Hsap_ENSP00000332371	Hsap_ENSP00000355180	Hsap_ENSP00000362870	Hsap_ENSP00000368544	Hsap_ENSP00000376708	Hsap_ENSP00000382356	Hsap_ENSP00000383894	Hsap_ENSP00000417185 Mlei_ML077636a	Mlei_ML270522a Nvec_XP_001617882	Nvec_XP_001618484	Nvec_XP_001618750	Nvec_XP_001620878	Nvec_XP_001621150	Nvec_XP_001621774	Nvec_XP_001621939	Nvec_XP_001622153	Nvec_XP_001622157	Nvec_XP_001622162
OG0000277 Nk52_evm34s2340	Nk52_evm4s304	Nk52_evm90s2118 Ddis_XP_644933 Dmel_FBpp0071605	Dmel_FBpp0074750	Dmel_FBpp0075004	Dmel_FBpp0079947	Dmel_FBpp0289932 Falb_H696_00323T0 Hsap_ENSP00000237596	Hsap_ENSP00000253255	Hsap_ENSP00000262304	Hsap_ENSP00000289672	Hsap_ENSP00000325296	Hsap_ENSP00000424725	Hsap_ENSP00000434417	Hsap_ENSP00000440053 Mlei_ML01487a	Mlei_ML044121a	Mlei_ML30812a Nvec_XP_001618912	Nvec_XP_001619147	Nvec_XP_001619152	Nvec_XP_001621036	Nvec_XP_001623596	Nvec_XP_001623597	Nvec_XP_001623598	Nvec_XP_001624045	Nvec_XP_001624424	Nvec_XP_001626529	Nvec_XP_001629030	Nvec_XP_001630081	Nvec_XP_001630083	Nvec_XP_001630231	Nvec_XP_001631031	Nvec_XP_001631032	Nvec_XP_001631033	Nvec_XP_001631034	Nvec_XP_001631035	Nvec_XP_001631036	Nvec_XP_001631169	Nvec_XP_001631170	Nvec_XP_001632113	Nvec_XP_001632114	Nvec_XP_001633316	Nvec_XP_001633726	Nvec_XP_001634051	Nvec_XP_001635258	Nvec_XP_001636807	Nvec_XP_001636947	Nvec_XP_001639045	Nvec_XP_001639046	Nvec_XP_001639086	Nvec_XP_001640030	Nvec_XP_001640090
OG0000278 Acas_g11726	Acas_g11932	Acas_g15386	Acas_g2108	Acas_g4035	Acas_g4256	Acas_g4409	Acas_g4549	Acas_g4572	Acas_g508	Acas_g7257	Acas_g8984	Acas_g9174 Aque_XP_003387201	Aque_XP_003389350	Aque_XP_003389356 Awhi_Unigene16344_m10040	Awhi_Unigene17364_m11155	Awhi_Unigene17365_m11162	Awhi_Unigene34578_m21612	Awhi_Unigene41339_m26393 Cang_134064 Cfra_1052T1	Cfra_2276T1	Cfra_7091T1 Clim_g1139 Cowc_CAOG_03772 Nk52_evm1s1843	Nk52_evm78s158 Ddis_XP_629559	Ddis_XP_636437	Ddis_XP_639365	Ddis_XP_646625	Ddis_XP_647075	Ddis_XP_647459 Dmel_FBpp0073126	Dmel_FBpp0083275	Dmel_FBpp0086858 Ehux_199323	Ehux_206480	Ehux_258642	Ehux_311506	Ehux_317568	Ehux_353871	Ehux_417097	Ehux_429434	Ehux_434215	Ehux_434223	Ehux_438902	Ehux_448230 Hsap_ENSP00000252456	Hsap_ENSP00000263097	Hsap_ENSP00000278968	Hsap_ENSP00000349571	Hsap_ENSP00000357076	Hsap_ENSP00000359225	Hsap_ENSP00000439890 Ihof_10641	Ihof_3258	Ihof_7852 Mlei_ML00501a	Mlei_ML00502a	Mlei_ML120740b Mver_08274 Mvib_comp12043_c0_seq1_m17647
OG0000279 Acas_g16760	Acas_g17357	Acas_g1980	Acas_g3802	Acas_g666 Aque_XP_003383915	Aque_XP_003386874 Awhi_Unigene23295_m15372	Awhi_Unigene30074_m18546	Awhi_Unigene3038_m2214	Awhi_Unigene3536_m2619	Awhi_Unigene3634_m2706	Awhi_Unigene36801_m23806	Awhi_Unigene42688_m27145 Cfra_4717T1 Clim_g4234	Clim_g5216 Cowc_CAOG_01031	Cowc_CAOG_01874	Cowc_CAOG_03472 Nk52_evm15s485	Nk52_evm25s356	Nk52_evm2s169	Nk52_evm32s2402	Nk52_evm36s208	Nk52_evm51s226	Nk52_evm6s914	Nk52_evm79s2118	Nk52_evm79s270	Nk52_evm85s352 Ddis_XP_635112 Dmel_FBpp0088022 Ehux_197496	Ehux_369099	Ehux_461108 Hsap_ENSP00000238667	Hsap_ENSP00000261038	Hsap_ENSP00000355938	Hsap_ENSP00000384616 Mlei_ML10614a	Mlei_ML14521a Mver_05159	Mver_09179	Mver_09180 Mvib_comp12012_c1_seq1_m17542	Mvib_comp143309_c0_seq1_m45480	Mvib_comp14922_c0_seq1_m31400	Mvib_comp14922_c0_seq2_m31403	Mvib_comp14922_c0_seq3_m31406	Mvib_comp3688_c0_seq1_m1730	Mvib_comp6491_c0_seq1_m4269	Mvib_comp6649_c0_seq1_m4437	Mvib_comp8627_c0_seq1_m8082 Ngru_XP_002669169	Ngru_XP_002669943	Ngru_XP_002671098	Ngru_XP_002673097	Ngru_XP_002679215	Ngru_XP_002679455	Ngru_XP_002680127	Ngru_XP_002680529	Ngru_XP_002681438 Nvec_XP_001617490	Nvec_XP_001628952	Nvec_XP_001632325
OG0000280 Acas_g10142	Acas_g1015	Acas_g1676	Acas_g3086	Acas_g709	Acas_g7899	Acas_g9811 Atha_AT1G10090	Atha_AT1G11960	Atha_AT1G30360	Atha_AT1G32090	Atha_AT1G58520	Atha_AT1G62320	Atha_AT1G69450	Atha_AT3G01100	Atha_AT3G21620	Atha_AT3G54510	Atha_AT4G02900	Atha_AT4G04340	Atha_AT4G15430	Atha_AT4G22120	Atha_AT4G35870 Awhi_Unigene11426_m7498	Awhi_Unigene11533_m7543	Awhi_Unigene24746_m16068	Awhi_Unigene26227_m16304	Awhi_Unigene27356_m16652	Awhi_Unigene28133_m16850	Awhi_Unigene31229_m18731	Awhi_Unigene32683_m20114	Awhi_Unigene35480_m22580	Awhi_Unigene40877_m26123	Awhi_Unigene42468_m27030	Awhi_Unigene42527_m27060	Awhi_Unigene42658_m27125	Awhi_Unigene7588_m4655 Cang_120379	Cang_48844	Cang_69255 Cfra_3223T1	Cfra_4391T1	Cfra_4528T1	Cfra_6650T1	Cfra_8067T1 Clim_g2355	Clim_g5039 Cowc_CAOG_02857	Cowc_CAOG_06242 Nk52_evm14s1737	Nk52_evm17s2011	Nk52_evm23s158	Nk52_evm4s1178	Nk52_evm8s351 Ddis_XP_639288	Ddis_XP_645282	Ddis_XP_645292 Dmel_FBpp0087859 Falb_H696_02283T0 Hsap_ENSP00000259746	Hsap_ENSP00000298351	Hsap_ENSP00000355800 Ihof_9810 Mlei_ML008321a Mver_03226
OG0000281 Acas_g11529	Acas_g13842	Acas_g3107	Acas_g873 Aque_XP_003383552	Aque_XP_003383619	Aque_XP_003383773	Aque_XP_003384836 Atha_AT1G07980	Atha_AT1G08970	Atha_AT1G54830	Atha_AT1G56170	Atha_AT3G12480	Atha_AT3G48590	Atha_AT5G19490	Atha_AT5G27910	Atha_AT5G38140	Atha_AT5G43250	Atha_AT5G50470	Atha_AT5G50480	Atha_AT5G50490	Atha_AT5G63470 Awhi_Unigene15251_m9556	Awhi_Unigene18613_m12637	Awhi_Unigene7784_m4878	Awhi_Unigene8044_m5178	Awhi_Unigene8155_m5309 Cang_151947	Cang_155694	Cang_35694	Cang_64376 Cfra_1527T1	Cfra_1915T1	Cfra_2959T1 Clim_g4524	Clim_g4600	Clim_g6498 Cowc_CAOG_03284	Cowc_CAOG_04070	Cowc_CAOG_07495 Nk52_evm1s2119	Nk52_evm1s2431	Nk52_evm2s2020 Ddis_XP_629595	Ddis_XP_644654	Ddis_XP_644985	Ddis_XP_647243 Dmel_FBpp0070935	Dmel_FBpp0071583	Dmel_FBpp0071738	Dmel_FBpp0073475 Ehux_212580 Falb_H696_00263T0	Falb_H696_00263T1	Falb_H696_00299T0	Falb_H696_03461T0 Hsap_ENSP00000220913	Hsap_ENSP00000312617	Hsap_ENSP00000366190	Hsap_ENSP00000420176 Ihof_2486	Ihof_4584	Ihof_4945	Ihof_7257 Mlei_ML05474a
OG0000282 Acas_g10021	Acas_g13197	Acas_g16039	Acas_g3604	Acas_g6752 Atha_AT1G01980	Atha_AT1G11770	Atha_AT1G26380	Atha_AT1G26390	Atha_AT1G26400	Atha_AT1G26410	Atha_AT1G26420	Atha_AT1G30700	Atha_AT1G30710	Atha_AT1G30720	Atha_AT1G30730	Atha_AT1G30740	Atha_AT1G30760	Atha_AT1G34575	Atha_AT2G34790	Atha_AT2G34810	Atha_AT4G20800	Atha_AT4G20820	Atha_AT4G20830	Atha_AT4G20840	Atha_AT4G20860	Atha_AT5G44360	Atha_AT5G44380	Atha_AT5G44390	Atha_AT5G44400	Atha_AT5G44410	Atha_AT5G44440 Awhi_Unigene35001_m22082	Awhi_Unigene476_m477	Awhi_Unigene7646_m4720	Awhi_Unigene8878_m6116 Cfra_7461T1 Cowc_CAOG_00138	Cowc_CAOG_00147 Nk52_evm17s559	Nk52_evm2s1992	Nk52_evm2s392	Nk52_evm3s1992	Nk52_evm5s249	Nk52_evm8s238	Nk52_evm9s312 Ddis_XP_636063	Ddis_XP_638109	Ddis_XP_639153	Ddis_XP_640651	Ddis_XP_640652	Ddis_XP_643419	Ddis_XP_646084	Ddis_XP_646382	Ddis_XP_647173 Ehux_100722	Ehux_199126
OG0000283 Acas_g11178	Acas_g11185	Acas_g11317	Acas_g12450	Acas_g15087 Aque_XP_003383531	Aque_XP_003384442	Aque_XP_003385135	Aque_XP_003386229	Aque_XP_003387743	Aque_XP_003389207	Aque_XP_003389208	Aque_XP_003389209	Aque_XP_003390216	Aque_XP_003390768	Aque_XP_003391536	Aque_XP_003391995	Aque_XP_003392042 Atha_AT1G02590	Atha_AT1G04580	Atha_AT2G27150	Atha_AT3G43600	Atha_AT4G34890	Atha_AT4G34900	Atha_AT5G20960 Awhi_Unigene34842_m21894	Awhi_Unigene34843_m21896	Awhi_Unigene34844_m21898	Awhi_Unigene9036_m6306	Awhi_Unigene9037_m6308 Cfra_3745T1	Cfra_5796T1 Cowc_CAOG_06347 Nk52_evm5s155	Nk52_evm63s1737 Ddis_XP_635420 Dmel_FBpp0082172	Dmel_FBpp0082604	Dmel_FBpp0082605	Dmel_FBpp0082607	Dmel_FBpp0082608 Ehux_109218	Ehux_120810	Ehux_226032	Ehux_253512	Ehux_461094	Ehux_469173	Ehux_50708	Ehux_57422 Hsap_ENSP00000363832	Hsap_ENSP00000368727 Mver_04668 Mvib_comp15214_c0_seq1_m33381	Mvib_comp15214_c0_seq4_m33387	Mvib_comp15214_c0_seq5_m33388	Mvib_comp15214_c1_seq1_m33390	Mvib_comp15240_c0_seq1_m33626	Mvib_comp15240_c1_seq1_m33631	Mvib_comp346142_c0_seq1_m47349	Mvib_comp70145_c0_seq1_m44402	Mvib_comp7851_c0_seq1_m6540 Ngru_XP_002667967	Ngru_XP_002668033
OG0000284 Aque_XP_003382703	Aque_XP_003382747	Aque_XP_003383890	Aque_XP_003384766	Aque_XP_003386140	Aque_XP_003387235	Aque_XP_003389591 Awhi_Unigene34551_m21587	Awhi_Unigene36150_m23311 Clim_g1879 Cowc_CAOG_01797	Cowc_CAOG_02725 Nk52_evm28s1444 Dmel_FBpp0071213	Dmel_FBpp0071748	Dmel_FBpp0074523	Dmel_FBpp0078914	Dmel_FBpp0079589	Dmel_FBpp0082261	Dmel_FBpp0085697	Dmel_FBpp0110258	Dmel_FBpp0288485 Falb_H696_06242T0 Hsap_ENSP00000261486	Hsap_ENSP00000263708	Hsap_ENSP00000263713	Hsap_ENSP00000264042	Hsap_ENSP00000298542	Hsap_ENSP00000303508	Hsap_ENSP00000330276	Hsap_ENSP00000338481	Hsap_ENSP00000338934	Hsap_ENSP00000341138	Hsap_ENSP00000345259	Hsap_ENSP00000349298	Hsap_ENSP00000350032	Hsap_ENSP00000353408	Hsap_ENSP00000355923	Hsap_ENSP00000363317	Hsap_ENSP00000363667	Hsap_ENSP00000363694	Hsap_ENSP00000365771	Hsap_ENSP00000380922	Hsap_ENSP00000381549	Hsap_ENSP00000384136	Hsap_ENSP00000403067 Mlei_ML050828a	Mlei_ML084414a	Mlei_ML088817a	Mlei_ML091225a	Mlei_ML102222a	Mlei_ML102224a	Mlei_ML270517a	Mlei_ML273211a	Mlei_ML368925a Mvib_comp12073_c1_seq1_m17753	Mvib_comp14543_c0_seq1_m29124	Mvib_comp14543_c0_seq2_m29126	Mvib_comp7702_c0_seq1_m6173 Ngru_XP_002679975 Nvec_XP_001617787
OG0000285 Acas_g1619	Acas_g693 Aque_XP_003382553	Aque_XP_003382578	Aque_XP_003383170	Aque_XP_003385988	Aque_XP_003391478 Atha_AT1G31280	Atha_AT1G31290	Atha_AT1G48410	Atha_AT1G69440	Atha_AT2G27040	Atha_AT2G27880	Atha_AT2G32940	Atha_AT5G21030	Atha_AT5G21150	Atha_AT5G43810 Awhi_Unigene16695_m10424	Awhi_Unigene7571_m4639 Cang_115812	Cang_139390	Cang_216313	Cang_49798	Cang_52789	Cang_99902 Cfra_5361T1 Nk52_evm35s1073	Nk52_evm44s1360 Ddis_XP_001134555	Ddis_XP_635708	Ddis_XP_636288	Ddis_XP_641121	Ddis_XP_643218	Ddis_XP_645445 Dmel_FBpp0075313	Dmel_FBpp0079754	Dmel_FBpp0079755	Dmel_FBpp0086738	Dmel_FBpp0289158 Ehux_211169	Ehux_226029	Ehux_414846	Ehux_430174	Ehux_46005 Hsap_ENSP00000220592	Hsap_ENSP00000245255	Hsap_ENSP00000299001	Hsap_ENSP00000330031	Hsap_ENSP00000349208	Hsap_ENSP00000362287	Hsap_ENSP00000362300	Hsap_ENSP00000362306 Ihof_1272	Ihof_5087	Ihof_8175 Mlei_ML007811a	Mlei_ML009119a	Mlei_ML04827a	Mlei_ML04828a	Mlei_ML063312a	Mlei_ML074232a	Mlei_ML074233a
OG0000286 Acas_g10827	Acas_g12099	Acas_g14176	Acas_g1721	Acas_g2829	Acas_g7840 Aque_XP_003383748 Atha_AT1G08990	Atha_AT1G09350	Atha_AT1G54940	Atha_AT1G56600	Atha_AT1G60450	Atha_AT1G60470	Atha_AT1G77130	Atha_AT2G35710	Atha_AT2G47180	Atha_AT3G18660	Atha_AT4G16600	Atha_AT4G26250	Atha_AT4G33330	Atha_AT5G18480	Atha_AT5G23790	Atha_AT5G30500 Awhi_Unigene16108_m9994	Awhi_Unigene17802_m11715	Awhi_Unigene8137_m5286 Cang_220004	Cang_227905 Cfra_2026T1 Clim_g145	Clim_g15	Clim_g2085	Clim_g2542	Clim_g3925	Clim_g427 Cowc_CAOG_01295 Nk52_evm12s62	Nk52_evm15s221	Nk52_evm69s1444 Ddis_XP_637479 Ehux_104837	Ehux_106165	Ehux_109551	Ehux_198468	Ehux_212500	Ehux_213945	Ehux_227604	Ehux_228183	Ehux_237952	Ehux_238329	Ehux_349363	Ehux_445242	Ehux_470494	Ehux_97003 Falb_H696_05610T0	Falb_H696_06287T0 Hsap_ENSP00000340736	Hsap_ENSP00000350540	Hsap_ENSP00000370555 Ihof_1502	Ihof_3977	Ihof_7577 Mlei_ML010526a	Mlei_ML113416a
OG0000287 Acas_g1990	Acas_g6799	Acas_g8744 Aque_XP_003383609 Atha_AT1G63440	Atha_AT2G19110	Atha_AT4G30110	Atha_AT4G30120	Atha_AT4G33520	Atha_AT4G37270	Atha_AT5G21930	Atha_AT5G44790 Awhi_Unigene10390_m7060	Awhi_Unigene14930_m9392	Awhi_Unigene28354_m17045	Awhi_Unigene30017_m18496	Awhi_Unigene32352_m19808	Awhi_Unigene38807_m25005	Awhi_Unigene39674_m25395	Awhi_Unigene41586_m26520	Awhi_Unigene42041_m26783	Awhi_Unigene8684_m5882 Cang_200098	Cang_48785 Cfra_1824T1	Cfra_7680T1 Clim_g5699	Clim_g6086	Clim_g6269 Cowc_CAOG_04972	Cowc_CAOG_07592 Nk52_evm14s2133	Nk52_evm20s2622 Ddis_XP_638720	Ddis_XP_644454	Ddis_XP_646096 Dmel_FBpp0271765 Ehux_111900	Ehux_195042	Ehux_195043	Ehux_229251	Ehux_252377	Ehux_349470	Ehux_452140	Ehux_452141	Ehux_452160	Ehux_464871	Ehux_469169 Falb_H696_05707T0 Hsap_ENSP00000242839	Hsap_ENSP00000345728 Ihof_1054	Ihof_3118	Ihof_3443	Ihof_4936 Mlei_ML090220a Mver_07021	Mver_07621	Mver_07689 Mvib_comp136968_c0_seq1_m45381	Mvib_comp239071_c0_seq1_m46642	Mvib_comp5533_c1_seq1_m3427	Mvib_comp692_c1_seq1_m438	Mvib_comp7272_c0_seq1_m5451	Mvib_comp93899_c0_seq1_m44813	Mvib_comp9726_c1_seq1_m10527	Mvib_comp9931_c0_seq1_m11036
OG0000288 Aque_XP_003388135 Atha_AT2G44740	Atha_AT2G45080	Atha_AT3G05327	Atha_AT3G21870	Atha_AT3G60550	Atha_AT3G63120	Atha_AT5G07450	Atha_AT5G61650 Awhi_Unigene22502_m15151	Awhi_Unigene29234_m17787	Awhi_Unigene29870_m18363	Awhi_Unigene34212_m21250	Awhi_Unigene37073_m23988 Cang_108267	Cang_114898	Cang_138369	Cang_177468	Cang_226249	Cang_24010	Cang_55150 Cfra_0666T1	Cfra_2499T1	Cfra_2509T1	Cfra_2879T1	Cfra_5885T1	Cfra_7332T1 Clim_g4298	Clim_g5918 Cowc_CAOG_00523	Cowc_CAOG_05370	Cowc_CAOG_05449 Nk52_evm3s271	Nk52_evm43s2367	Nk52_evm54s2152	Nk52_evm72s230 Ddis_XP_002649130	Ddis_XP_637698	Ddis_XP_637853	Ddis_XP_641168	Ddis_XP_642587	Ddis_XP_642680 Dmel_FBpp0112547 Ehux_104571	Ehux_416046 Falb_H696_03464T0 Hsap_ENSP00000353698 Ihof_1697	Ihof_2640	Ihof_4117	Ihof_5292	Ihof_7789 Mver_00859	Mver_00864	Mver_01014	Mver_01388	Mver_05438	Mver_06314	Mver_06565	Mver_06820	Mver_07970	Mver_08488	Mver_10699	Mver_11037
OG0000289 Acas_g10781	Acas_g1240	Acas_g1243	Acas_g17883	Acas_g4924 Aque_XP_003383097 Atha_AT1G11090	Atha_AT1G18360	Atha_AT1G52760	Atha_AT1G73480	Atha_AT1G77420	Atha_AT2G39400	Atha_AT2G39410	Atha_AT2G39420	Atha_AT2G47630	Atha_AT3G55180	Atha_AT3G55190	Atha_AT3G62860	Atha_AT5G11650	Atha_AT5G14980	Atha_AT5G16120	Atha_AT5G19290 Awhi_Unigene16363_m10067	Awhi_Unigene20463_m14079	Awhi_Unigene28017_m16754	Awhi_Unigene3091_m2274	Awhi_Unigene35253_m22342	Awhi_Unigene35388_m22485	Awhi_Unigene35389_m22486	Awhi_Unigene35391_m22487	Awhi_Unigene35845_m22946	Awhi_Unigene37865_m24573 Cang_258088	Cang_54346	Cang_59376 Cfra_1021T1	Cfra_1241T1	Cfra_1626T1	Cfra_6313T1	Cfra_7475T1	Cfra_8085T1 Clim_g2369 Cowc_CAOG_08754 Nk52_evm3s2640	Nk52_evm70s230 Ddis_XP_643285	Ddis_XP_646967 Ehux_251925	Ehux_358135	Ehux_366640	Ehux_449059	Ehux_469643	Ehux_98059 Falb_H696_00996T0 Hsap_ENSP00000265052 Ihof_6044	Ihof_8280 Mlei_ML05178a	Mlei_ML07375a	Mlei_ML07377a	Mlei_ML23452a Mver_03594 Mvib_comp11783_c0_seq1_m16797	Mvib_comp11783_c0_seq2_m16799	Mvib_comp13671_c0_seq1_m24498	Mvib_comp14181_c0_seq1_m27059
OG0000290 Acas_g13445	Acas_g2732	Acas_g5689	Acas_g6180	Acas_g6406	Acas_g9698 Atha_AT3G51520 Awhi_Unigene100_m93	Awhi_Unigene16598_m10309	Awhi_Unigene18994_m12723	Awhi_Unigene28836_m17478	Awhi_Unigene31758_m19211	Awhi_Unigene35652_m22748	Awhi_Unigene37363_m24197	Awhi_Unigene40248_m25746	Awhi_Unigene8185_m5338 Cang_210649	Cang_35661	Cang_59068 Cfra_2738T1	Cfra_3176T1	Cfra_4113T1	Cfra_4439T1	Cfra_8020T1 Clim_g3355	Clim_g3969	Clim_g6595 Cowc_CAOG_04763	Cowc_CAOG_05176	Cowc_CAOG_05918 Nk52_evm13s123	Nk52_evm16s2657	Nk52_evm25s123 Ddis_XP_635762 Dmel_FBpp0088001	Dmel_FBpp0088002	Dmel_FBpp0088003 Ehux_108460	Ehux_201903	Ehux_213149	Ehux_226507	Ehux_236438	Ehux_413912	Ehux_440315	Ehux_452421	Ehux_459866	Ehux_462450	Ehux_67639 Falb_H696_01279T0	Falb_H696_02918T0 Hsap_ENSP00000198801	Hsap_ENSP00000228027	Hsap_ENSP00000328036	Hsap_ENSP00000363645	Hsap_ENSP00000368732	Hsap_ENSP00000403756	Hsap_ENSP00000406674	Hsap_ENSP00000421172 Ihof_3183	Ihof_4460	Ihof_9512	Ihof_9933 Mver_03028	Mver_09384 Mvib_comp8022_c0_seq1_m6868 Nvec_XP_001630435
OG0000291 Acas_g3319 Aque_XP_003382890	Aque_XP_003384860 Atha_AT1G03930	Atha_AT1G04440	Atha_AT1G72710	Atha_AT2G19470	Atha_AT3G23340	Atha_AT4G08800	Atha_AT4G14340	Atha_AT4G26100	Atha_AT4G28540	Atha_AT4G28860	Atha_AT4G28880	Atha_AT5G43320	Atha_AT5G44100	Atha_AT5G57015 Awhi_Unigene18210_m12198	Awhi_Unigene8686_m5885	Awhi_Unigene9073_m6352 Cang_121611	Cang_29266	Cang_65814 Cfra_0209T1	Cfra_7670T1 Clim_g6162	Clim_g6311	Clim_g846 Cowc_CAOG_02768	Cowc_CAOG_03955	Cowc_CAOG_07938 Nk52_evm5s696	Nk52_evm6s1444	Nk52_evm7s295 Ddis_XP_644485 Dmel_FBpp0073476	Dmel_FBpp0073513	Dmel_FBpp0077423	Dmel_FBpp0078437	Dmel_FBpp0080543	Dmel_FBpp0085104	Dmel_FBpp0099737 Ehux_356218 Falb_H696_01986T0	Falb_H696_03544T0 Hsap_ENSP00000255641	Hsap_ENSP00000305777	Hsap_ENSP00000324464	Hsap_ENSP00000352929	Hsap_ENSP00000353904	Hsap_ENSP00000369126	Hsap_ENSP00000421689 Ihof_4419	Ihof_5452	Ihof_7055 Mlei_ML02604a	Mlei_ML039711a	Mlei_ML05904a	Mlei_ML090125a	Mlei_ML40945a Mver_04161	Mver_06021	Mver_06043 Mvib_comp10855_c0_seq1_m13621	Mvib_comp14755_c0_seq1_m30382	Mvib_comp3325_c0_seq1_m1359	Mvib_comp4200_c0_seq1_m2156 Ngru_XP_002676694
OG0000292 Acas_g1033	Acas_g11768 Aque_XP_003384854	Aque_XP_003389793	Aque_XP_003392048 Atha_AT1G42470	Atha_AT4G38350 Awhi_Unigene2356_m1676	Awhi_Unigene24210_m15804	Awhi_Unigene30053_m18529	Awhi_Unigene40123_m25661 Cang_155984 Cfra_5447T1 Clim_g1956	Clim_g6061 Cowc_CAOG_03321 Nk52_evm24s232	Nk52_evm72s1073	Nk52_evm97s914 Ddis_XP_635310	Ddis_XP_643013	Ddis_XP_646800 Dmel_FBpp0076932	Dmel_FBpp0079547	Dmel_FBpp0085347	Dmel_FBpp0085363 Ehux_236803	Ehux_237489	Ehux_309309 Falb_H696_01950T0	Falb_H696_04572T0 Hsap_ENSP00000265565	Hsap_ENSP00000269228	Hsap_ENSP00000289547	Hsap_ENSP00000341914	Hsap_ENSP00000368666	Hsap_ENSP00000417658 Ihof_6240 Mlei_ML020065a	Mlei_ML04527a	Mlei_ML064953a	Mlei_ML116911a	Mlei_ML17052a	Mlei_ML20563a	Mlei_ML460829a Mver_04344	Mver_05743 Mvib_comp12869_c0_seq1_m20785	Mvib_comp15218_c1_seq1_m33414	Mvib_comp15218_c1_seq2_m33423	Mvib_comp15218_c1_seq3_m33431	Mvib_comp15218_c1_seq4_m33433	Mvib_comp15859_c0_seq1_m39963 Ngru_XP_002671476	Ngru_XP_002675569 Nvec_XP_001622498	Nvec_XP_001624533	Nvec_XP_001629035	Nvec_XP_001631249	Nvec_XP_001631252	Nvec_XP_001632695	Nvec_XP_001634931	Nvec_XP_001639005	Nvec_XP_001641016 Pgem_Unigene15322_Pirum_gemmatam9743	Pgem_Unigene21566_Pirum_gemmatam13978	Pgem_Unigene26964_Pirum_gemmatam16416	Pgem_Unigene35220_Pirum_gemmatam21709	Pgem_Unigene37181_Pirum_gemmatam23086	Pgem_Unigene60_Pirum_gemmatam62 Pyez_17295_g4214
OG0000293 Acas_g11991	Acas_g15229	Acas_g2537	Acas_g4882	Acas_g9140 Aque_XP_003382716	Aque_XP_003382755 Atha_AT1G08460	Atha_AT3G18520	Atha_AT4G33470	Atha_AT5G61060	Atha_AT5G61070 Awhi_Unigene13189_m8550	Awhi_Unigene13190_m8553	Awhi_Unigene19025_m12749	Awhi_Unigene33499_m20908	Awhi_Unigene39710_m25424 Cfra_1953T1	Cfra_3468T1	Cfra_6649T1 Clim_g2901	Clim_g4102	Clim_g42	Clim_g5080 Cowc_CAOG_05354	Cowc_CAOG_09014 Nk52_evm31s236	Nk52_evm6s2192	Nk52_evm89s745 Ddis_XP_641298	Ddis_XP_641762 Dmel_FBpp0073826	Dmel_FBpp0290513 Ehux_110315	Ehux_118559	Ehux_199501	Ehux_200147	Ehux_211674	Ehux_234185	Ehux_236351	Ehux_244705	Ehux_253196	Ehux_350223	Ehux_426194	Ehux_447983	Ehux_448459	Ehux_454839	Ehux_456645	Ehux_461310	Ehux_464061	Ehux_55159 Falb_H696_02785T0	Falb_H696_03435T0	Falb_H696_03693T0 Hsap_ENSP00000216271	Hsap_ENSP00000225983	Hsap_ENSP00000264606	Hsap_ENSP00000369984	Hsap_ENSP00000398566	Hsap_ENSP00000408617 Ihof_10071	Ihof_398	Ihof_4261
OG0000294 Acas_g2638	Acas_g5763	Acas_g5764 Aque_XP_003383632	Aque_XP_003391595 Atha_AT1G08600	Atha_AT3G19210 Awhi_Unigene19114_m12837	Awhi_Unigene19115_m12838	Awhi_Unigene19768_m13450	Awhi_Unigene19769_m13451	Awhi_Unigene21105_m14703	Awhi_Unigene33327_m20738	Awhi_Unigene37201_m24090	Awhi_Unigene40465_m25880	Awhi_Unigene9928_m6858 Cang_127531	Cang_387628 Cfra_1047T1	Cfra_1048T1	Cfra_1075T1	Cfra_1076T1 Clim_g123 Cowc_CAOG_03701	Cowc_CAOG_04682 Nk52_evm10s222	Nk52_evm54s270 Ddis_XP_629344	Ddis_XP_639303	Ddis_XP_639875 Dmel_FBpp0072192	Dmel_FBpp0077357	Dmel_FBpp0084212 Ehux_125542	Ehux_207861	Ehux_213980	Ehux_223806	Ehux_235283	Ehux_238814	Ehux_238958	Ehux_238959	Ehux_451464	Ehux_46257	Ehux_465841	Ehux_74237	Ehux_96114 Falb_H696_00650T0 Hsap_ENSP00000336606	Hsap_ENSP00000361043	Hsap_ENSP00000362441	Hsap_ENSP00000386520 Ihof_1718	Ihof_2330	Ihof_3626	Ihof_5774	Ihof_790	Ihof_8811 Mlei_ML007318a	Mlei_ML069124a	Mlei_ML069125a	Mlei_ML358835a	Mlei_ML39324a Mver_04149	Mver_04571	Mver_11914 Mvib_comp10081_c0_seq1_m11383	Mvib_comp340216_c0_seq1_m47312
OG0000295 Acas_g10857	Acas_g15913	Acas_g3519	Acas_g7940 Aque_XP_003382734	Aque_XP_003383354	Aque_XP_003390374 Atha_AT1G06130	Atha_AT1G53580	Atha_AT2G31350	Atha_AT2G43430	Atha_AT3G10850 Awhi_Unigene11946_m7725	Awhi_Unigene3377_m2494	Awhi_Unigene3378_m2495	Awhi_Unigene34116_m21150	Awhi_Unigene35586_m22691	Awhi_Unigene37087_m24002	Awhi_Unigene37088_m24003 Cang_107135	Cang_125916	Cang_46992 Cfra_0642T1	Cfra_3353T1	Cfra_5589T1	Cfra_6587T1 Clim_g190	Clim_g211	Clim_g6077 Cowc_CAOG_03238	Cowc_CAOG_06419 Nk52_evm54s1810 Ddis_XP_635245	Ddis_XP_638232 Dmel_FBpp0077912	Dmel_FBpp0112515	Dmel_FBpp0288428 Ehux_197776	Ehux_436379	Ehux_437469	Ehux_56275	Ehux_68628	Ehux_95217	Ehux_99982 Falb_H696_01061T0 Hsap_ENSP00000273077	Hsap_ENSP00000292147	Hsap_ENSP00000341952	Hsap_ENSP00000380514 Ihof_8048 Mlei_ML00424a	Mlei_ML30691a Mver_05718	Mver_06429 Mvib_comp13805_c0_seq1_m25225	Mvib_comp13805_c0_seq2_m25228	Mvib_comp162615_c0_seq1_m45714	Mvib_comp166087_c0_seq1_m45798	Mvib_comp334319_c0_seq1_m47225 Ngru_XP_002672865	Ngru_XP_002678024	Ngru_XP_002679906	Ngru_XP_002680794 Nvec_XP_001620017	Nvec_XP_001621920	Nvec_XP_001634076	Nvec_XP_001636487	Nvec_XP_001639978 Pgem_Unigene1080_Pirum_gemmatam832	Pgem_Unigene11341_Pirum_gemmatam7392
OG0000296 Acas_g3869 Aque_XP_003387985	Aque_XP_003389832	Aque_XP_003389978	Aque_XP_003389980 Atha_AT1G54370	Atha_AT1G79610	Atha_AT3G05030	Atha_AT3G06370	Atha_AT5G27150	Atha_AT5G55470 Awhi_Unigene2606_m1876	Awhi_Unigene32888_m20300	Awhi_Unigene7145_m4190	Awhi_Unigene7146_m4191 Cang_35294	Cang_38475 Cfra_0482T1	Cfra_1798T1	Cfra_5537T1 Clim_g2150	Clim_g5057	Clim_g5463	Clim_g876 Cowc_CAOG_01005	Cowc_CAOG_04631	Cowc_CAOG_07792 Nk52_evm110s221	Nk52_evm17s305	Nk52_evm1s868	Nk52_evm22s233	Nk52_evm3s710	Nk52_evm49s230 Ddis_XP_640474	Ddis_XP_643611 Dmel_FBpp0271755	Dmel_FBpp0289190	Dmel_FBpp0290667 Ehux_196090	Ehux_434034	Ehux_457238	Ehux_464223	Ehux_467173	Ehux_467182	Ehux_471012 Hsap_ENSP00000233969	Hsap_ENSP00000263980	Hsap_ENSP00000264938	Hsap_ENSP00000295269	Hsap_ENSP00000299798	Hsap_ENSP00000320246	Hsap_ENSP00000330320	Hsap_ENSP00000359729	Hsap_ENSP00000359730	Hsap_ENSP00000416418 Ihof_10244	Ihof_4077	Ihof_8130 Mlei_ML00086a	Mlei_ML045251a	Mlei_ML21939a	Mlei_ML29499a Mver_08521 Mvib_comp10067_c1_seq1_m11355	Mvib_comp10067_c2_seq1_m11356	Mvib_comp11041_c0_seq1_m14206
OG0000297 Acas_g1052	Acas_g1099	Acas_g11500	Acas_g11915	Acas_g12188	Acas_g13121	Acas_g14401	Acas_g14541	Acas_g14759	Acas_g193	Acas_g2347	Acas_g2348	Acas_g2351	Acas_g2730	Acas_g2767	Acas_g2768	Acas_g2785	Acas_g2786	Acas_g3345	Acas_g4461	Acas_g4477	Acas_g4727	Acas_g4986	Acas_g542	Acas_g5624	Acas_g5942	Acas_g7196	Acas_g7379	Acas_g7440	Acas_g7441	Acas_g7466	Acas_g8190	Acas_g8456	Acas_g8562	Acas_g9059	Acas_g9356	Acas_g9445 Aque_XP_003385417 Awhi_Unigene12340_m7976	Awhi_Unigene17305_m11095	Awhi_Unigene28065_m16791	Awhi_Unigene29109_m17690	Awhi_Unigene36347_m23506 Cang_130760 Cfra_2196T1	Cfra_2961T1	Cfra_3798T1	Cfra_4081T1	Cfra_4300T1	Cfra_7493T1 Clim_g4073	Clim_g5837 Cowc_CAOG_00356 Nk52_evm32s224	Nk52_evm4s271	Nk52_evm6s343	Nk52_evm7s1967 Dmel_FBpp0081227
OG0000298 Acas_g12690	Acas_g2775	Acas_g7640 Aque_XP_003385964	Aque_XP_003386655	Aque_XP_003391607 Atha_AT1G51980	Atha_AT3G02090	Atha_AT3G16480 Awhi_Unigene16347_m10041	Awhi_Unigene18408_m12414	Awhi_Unigene21998_m14999	Awhi_Unigene25282_m16173	Awhi_Unigene28286_m16980	Awhi_Unigene34042_m21068	Awhi_Unigene34170_m21206	Awhi_Unigene34171_m21208	Awhi_Unigene6830_m3801 Cang_34606	Cang_54096	Cang_56245	Cang_57799 Cfra_0882T1	Cfra_1760T1	Cfra_3429T1	Cfra_7630T1 Clim_g2793	Clim_g3195	Clim_g3412 Cowc_CAOG_02340	Cowc_CAOG_06706	Cowc_CAOG_07363 Nk52_evm11s372	Nk52_evm5s311	Nk52_evm6s2039 Ddis_XP_001134518	Ddis_XP_001134603	Ddis_XP_635444 Dmel_FBpp0075069	Dmel_FBpp0082459	Dmel_FBpp0087958 Ehux_254142	Ehux_438040	Ehux_443369	Ehux_446942 Falb_H696_01120T0	Falb_H696_01367T0	Falb_H696_04037T0 Hsap_ENSP00000203407	Hsap_ENSP00000268379	Hsap_ENSP00000360782	Hsap_ENSP00000390035 Ihof_1593	Ihof_2762	Ihof_4607	Ihof_7438 Mlei_ML005132a	Mlei_ML07971a	Mlei_ML09835a Mver_04983	Mver_05212	Mver_08753 Mvib_comp14673_c0_seq1_m29841	Mvib_comp14810_c0_seq1_m30689	Mvib_comp5079_c0_seq1_m3001 Ngru_XP_002669264	Ngru_XP_002675933	Ngru_XP_002678619 Nvec_XP_001630965
OG0000299 Acas_g15053	Acas_g16603	Acas_g5066	Acas_g5362	Acas_g5407	Acas_g9390 Aque_XP_003382494	Aque_XP_003387020	Aque_XP_003389271 Atha_AT1G21660	Atha_AT1G30280	Atha_AT1G75100	Atha_AT1G75310	Atha_AT2G32850	Atha_AT4G12770	Atha_AT4G12780	Atha_AT4G36520	Atha_AT5G08160 Awhi_Unigene32402_m19857	Awhi_Unigene34569_m21603	Awhi_Unigene36069_m23201 Cang_126262	Cang_188844	Cang_294596 Cfra_0932T1	Cfra_4060T1	Cfra_4712T1 Clim_g1562	Clim_g2494	Clim_g785 Cowc_CAOG_00354	Cowc_CAOG_00763	Cowc_CAOG_08028	Cowc_CAOG_10006 Nk52_evm103s221	Nk52_evm1s1868	Nk52_evm5s208 Ddis_XP_635157	Ddis_XP_641248	Ddis_XP_643126	Ddis_XP_643152 Dmel_FBpp0078604	Dmel_FBpp0080729	Dmel_FBpp0081116 Ehux_102430	Ehux_245791	Ehux_431902	Ehux_463538 Falb_H696_02510T0 Hsap_ENSP00000314499	Hsap_ENSP00000334836	Hsap_ENSP00000386456	Hsap_ENSP00000387156	Hsap_ENSP00000415681 Ihof_10668	Ihof_7303	Ihof_9050 Mlei_ML03281a	Mlei_ML04214a	Mlei_ML094330a	Mlei_ML20768a Mver_00419	Mver_00815	Mver_05638 Mvib_comp11583_c0_seq1_m16121	Mvib_comp12992_c0_seq1_m21455	Mvib_comp13913_c0_seq1_m25700
OG0000300 Acas_g2052	Acas_g2796	Acas_g9649 Aque_XP_003385592	Aque_XP_003386206	Aque_XP_003391474	Aque_XP_003391920	Aque_XP_003391941 Atha_AT5G36880 Awhi_Unigene22478_m15147	Awhi_Unigene35008_m22092	Awhi_Unigene4356_m3045 Cang_36079	Cang_61565 Cfra_1266T1	Cfra_6745T1	Cfra_8382T1 Clim_g3421	Clim_g3866 Cowc_CAOG_00104	Cowc_CAOG_02635	Cowc_CAOG_06263 Nk52_evm1s410	Nk52_evm44s279 Ddis_XP_642111	Ddis_XP_642493	Ddis_XP_643176	Ddis_XP_643213	Ddis_XP_644178	Ddis_XP_644460	Ddis_XP_644462	Ddis_XP_644464	Ddis_XP_644471	Ddis_XP_644775	Ddis_XP_644777	Ddis_XP_644784	Ddis_XP_644785	Ddis_XP_644789	Ddis_XP_645288	Ddis_XP_645289	Ddis_XP_647088	Ddis_XP_647114	Ddis_XP_647115 Dmel_FBpp0078067	Dmel_FBpp0083990 Ehux_222715	Ehux_451133	Ehux_64778 Hsap_ENSP00000219054	Hsap_ENSP00000253382	Hsap_ENSP00000289416	Hsap_ENSP00000301956	Hsap_ENSP00000316924	Hsap_ENSP00000327453	Hsap_ENSP00000327916	Hsap_ENSP00000382349	Hsap_ENSP00000438774	Hsap_ENSP00000449535 Ihof_5057 Mlei_ML00484a	Mlei_ML00485a	Mlei_ML16568a Mver_04508	Mver_04526	Mver_04665 Mvib_comp15605_c0_seq1_m36825
OG0000301 Aque_XP_003385207 Awhi_Unigene16472_m10176 Clim_g2980 Cowc_CAOG_01495 Nk52_evm1s48	Nk52_evm3s2635 Dmel_FBpp0075120	Dmel_FBpp0112395 Ehux_107737	Ehux_114434	Ehux_198565	Ehux_206815	Ehux_208372	Ehux_211126	Ehux_211745	Ehux_229143	Ehux_239034	Ehux_249179	Ehux_250817	Ehux_254980	Ehux_355065	Ehux_372079	Ehux_423201	Ehux_445330	Ehux_449985	Ehux_45000	Ehux_45035	Ehux_45054	Ehux_455760	Ehux_457924	Ehux_460292	Ehux_468587	Ehux_50111	Ehux_94981 Hsap_ENSP00000252826	Hsap_ENSP00000303575	Hsap_ENSP00000320239	Hsap_ENSP00000323926	Hsap_ENSP00000381026	Hsap_ENSP00000389542	Hsap_ENSP00000407341	Hsap_ENSP00000434121	Hsap_ENSP00000437849 Ihof_8243 Mlei_ML00085a	Mlei_ML00341a	Mlei_ML019118a	Mlei_ML025016a	Mlei_ML032416a	Mlei_ML040413a	Mlei_ML040414a	Mlei_ML065725a	Mlei_ML095311a	Mlei_ML10909a	Mlei_ML111735a	Mlei_ML131715a	Mlei_ML16888a	Mlei_ML17746a	Mlei_ML19673a
OG0000302 Acas_g12001	Acas_g15431	Acas_g1639	Acas_g1783	Acas_g1932	Acas_g358	Acas_g6935 Aque_XP_003383247	Aque_XP_003384291	Aque_XP_003384292	Aque_XP_003384312	Aque_XP_003387573 Atha_AT1G29550	Atha_AT1G29590	Atha_AT4G18040	Atha_AT5G18110	Atha_AT5G35620 Awhi_Unigene16903_m10655	Awhi_Unigene29855_m18348	Awhi_Unigene34705_m21759 Cang_60409	Cang_75903 Cfra_1379T1	Cfra_2021T1	Cfra_2703T1 Clim_g3085	Clim_g5655 Cowc_CAOG_01071	Cowc_CAOG_07781 Nk52_evm24s284	Nk52_evm4s378	Nk52_evm5s207 Ddis_XP_001732954	Ddis_XP_629949	Ddis_XP_638421	Ddis_XP_640388	Ddis_XP_646776	Ddis_XP_647593 Dmel_FBpp0070242	Dmel_FBpp0076215	Dmel_FBpp0076424	Dmel_FBpp0076464	Dmel_FBpp0076672	Dmel_FBpp0084713	Dmel_FBpp0289702 Ehux_414699	Ehux_452339	Ehux_460036 Falb_H696_03304T0 Hsap_ENSP00000258416	Hsap_ENSP00000323714	Hsap_ENSP00000393324	Hsap_ENSP00000425561 Ihof_1715	Ihof_1720	Ihof_4996 Mlei_ML14426a	Mlei_ML342221a Mver_02150	Mver_03290	Mver_03801	Mver_04021	Mver_05039	Mver_05358	Mver_06797	Mver_07720 Mvib_comp11565_c0_seq1_m16054
OG0000303 Acas_g10757	Acas_g1079	Acas_g11755	Acas_g2837	Acas_g4829	Acas_g6118 Aque_XP_003383218	Aque_XP_003385184	Aque_XP_003386918	Aque_XP_003387677	Aque_XP_003391402	Aque_XP_003391664 Atha_AT3G11910	Atha_AT3G49600	Atha_AT5G06600 Awhi_Unigene10837_m7246	Awhi_Unigene11598_m7582	Awhi_Unigene38223_m24836	Awhi_Unigene7664_m4738	Awhi_Unigene8695_m5897 Cang_51570 Cfra_2707T1	Cfra_3884T1 Clim_g2424 Cowc_CAOG_06089	Cowc_CAOG_06148 Nk52_evm51s2192	Nk52_evm82s270 Ddis_XP_636128	Ddis_XP_643147	Ddis_XP_643907 Dmel_FBpp0073474	Dmel_FBpp0076802 Ehux_102911	Ehux_117663	Ehux_201710	Ehux_237887	Ehux_441425	Ehux_466852 Falb_H696_02787T0	Falb_H696_02787T1 Hsap_ENSP00000215794	Hsap_ENSP00000371310	Hsap_ENSP00000382382	Hsap_ENSP00000414922	Hsap_ENSP00000415434	Hsap_ENSP00000431949 Ihof_6021	Ihof_778	Ihof_9505 Mlei_ML030415a Mver_00578	Mver_03301	Mver_07723 Mvib_comp14275_c2_seq1_m27622	Mvib_comp14275_c2_seq2_m27627	Mvib_comp14275_c2_seq3_m27633	Mvib_comp14275_c2_seq4_m27637 Ngru_XP_002670715	Ngru_XP_002672937	Ngru_XP_002675321	Ngru_XP_002675630	Ngru_XP_002679670 Nvec_XP_001618463	Nvec_XP_001619639	Nvec_XP_001620195	Nvec_XP_001622838	Nvec_XP_001626845	Nvec_XP_001635916 Pgem_Unigene12351_Pirum_gemmatam7948
OG0000304 Acas_g2086	Acas_g8555	Acas_g9787 Aque_XP_003383007 Atha_AT1G03020	Atha_AT1G06830	Atha_AT1G28480	Atha_AT1G77370	Atha_AT2G20270	Atha_AT2G30540	Atha_AT2G47870	Atha_AT2G47880	Atha_AT3G02000	Atha_AT3G21460	Atha_AT3G62930	Atha_AT3G62950	Atha_AT3G62960	Atha_AT4G15660	Atha_AT4G15670	Atha_AT4G15680	Atha_AT4G15690	Atha_AT4G15700	Atha_AT4G28730	Atha_AT4G33040	Atha_AT5G11930	Atha_AT5G14070	Atha_AT5G18600	Atha_AT5G20500	Atha_AT5G40370	Atha_AT5G63030 Awhi_Unigene32815_m20231	Awhi_Unigene34764_m21822	Awhi_Unigene40891_m26131 Cang_106656 Cfra_1691T1	Cfra_7718T1 Clim_g1133	Clim_g5310 Cowc_CAOG_07643 Nk52_evm15s367	Nk52_evm1s800 Ddis_XP_635113	Ddis_XP_635914	Ddis_XP_646775 Dmel_FBpp0071631	Dmel_FBpp0113083 Ehux_197665	Ehux_223249	Ehux_229661	Ehux_259434	Ehux_363099	Ehux_372717	Ehux_435204	Ehux_454667	Ehux_458608	Ehux_58907	Ehux_59118	Ehux_59168	Ehux_60433 Falb_H696_01414T0 Hsap_ENSP00000237858	Hsap_ENSP00000356410 Ihof_5464	Ihof_700 Mlei_ML000715a
OG0000305 Aque_XP_003384401 Dmel_FBpp0071536	Dmel_FBpp0075495 Hsap_ENSP00000221347	Hsap_ENSP00000261405	Hsap_ENSP00000264037	Hsap_ENSP00000297161	Hsap_ENSP00000325519	Hsap_ENSP00000334186	Hsap_ENSP00000382323	Hsap_ENSP00000395253	Hsap_ENSP00000400895	Hsap_ENSP00000406861	Hsap_ENSP00000415183	Hsap_ENSP00000415793	Hsap_ENSP00000422387	Hsap_ENSP00000435591 Mlei_ML005212a	Mlei_ML005213a	Mlei_ML00638a	Mlei_ML009817a	Mlei_ML01282a	Mlei_ML01517a	Mlei_ML015615a	Mlei_ML017313a	Mlei_ML019140a	Mlei_ML019233a	Mlei_ML022012a	Mlei_ML03131a	Mlei_ML03226a	Mlei_ML03227a	Mlei_ML033230a	Mlei_ML033231a	Mlei_ML033232a	Mlei_ML048120a	Mlei_ML051416a	Mlei_ML055015a	Mlei_ML065752a	Mlei_ML07218a	Mlei_ML093517a	Mlei_ML09791a	Mlei_ML102210a	Mlei_ML11032a	Mlei_ML11033a	Mlei_ML12185a	Mlei_ML14013a	Mlei_ML14246a	Mlei_ML14247a	Mlei_ML145831a	Mlei_ML150912a	Mlei_ML154123a	Mlei_ML173711a	Mlei_ML18936a
OG0000306 Acas_g10934	Acas_g11446	Acas_g12625	Acas_g15385	Acas_g16748	Acas_g18266	Acas_g1923	Acas_g3394	Acas_g5785 Aque_XP_003382735	Aque_XP_003383745	Aque_XP_003387986 Atha_AT1G22150	Atha_AT1G23090	Atha_AT1G77990	Atha_AT1G78000	Atha_AT3G12520	Atha_AT3G15990	Atha_AT3G51895	Atha_AT4G02700	Atha_AT4G08620	Atha_AT5G10180	Atha_AT5G13550	Atha_AT5G19600 Awhi_Unigene14601_m9201	Awhi_Unigene15654_m9775	Awhi_Unigene5883_m3433 Cang_37881 Cfra_3297T1	Cfra_4235T1 Clim_g4185	Clim_g4354	Clim_g5513	Clim_g6350	Clim_g685 Cowc_CAOG_01991 Nk52_evm4s2171 Ddis_XP_001733021	Ddis_XP_643018	Ddis_XP_647525	Ddis_XP_647535 Dmel_FBpp0074919	Dmel_FBpp0075781	Dmel_FBpp0082560	Dmel_FBpp0082619	Dmel_FBpp0084081	Dmel_FBpp0084970	Dmel_FBpp0085026	Dmel_FBpp0085041	Dmel_FBpp0088515 Ehux_453061 Falb_H696_00780T0 Hsap_ENSP00000265715	Hsap_ENSP00000286298	Hsap_ENSP00000309504	Hsap_ENSP00000320217	Hsap_ENSP00000341682	Hsap_ENSP00000347778	Hsap_ENSP00000354721	Hsap_ENSP00000355384	Hsap_ENSP00000377328	Hsap_ENSP00000378920 Ihof_4175	Ihof_9115 Mlei_ML02607a
OG0000307 Acas_g18340	Acas_g6026	Acas_g7923 Aque_XP_003384192 Atha_AT1G06670	Atha_AT1G48650	Atha_AT1G58050	Atha_AT1G58060	Atha_AT2G01130	Atha_AT2G30800	Atha_AT2G35920	Atha_AT5G04895 Awhi_Unigene23914_m15666	Awhi_Unigene32315_m19776	Awhi_Unigene39660_m25382 Cang_120546	Cang_321409 Cfra_6069T1	Cfra_7272T1	Cfra_8415T1	Cfra_8550T1 Clim_g1934	Clim_g2314 Cowc_CAOG_04983	Cowc_CAOG_05226 Nk52_evm13s554	Nk52_evm20s1178	Nk52_evm47s296	Nk52_evm56s1360 Ddis_XP_643861	Ddis_XP_647095 Dmel_FBpp0073259	Dmel_FBpp0074221	Dmel_FBpp0080988	Dmel_FBpp0082637	Dmel_FBpp0085367 Ehux_102164	Ehux_123008	Ehux_209064	Ehux_416776	Ehux_417689	Ehux_421878	Ehux_423676	Ehux_423891	Ehux_448382	Ehux_66219	Ehux_73936 Falb_H696_00370T0 Hsap_ENSP00000161863	Hsap_ENSP00000251636	Hsap_ENSP00000295373	Hsap_ENSP00000356520	Hsap_ENSP00000387303	Hsap_ENSP00000394682	Hsap_ENSP00000417078 Ihof_1378	Ihof_5810 Mlei_ML01983a	Mlei_ML030924a	Mlei_ML030925a	Mlei_ML143039a Mver_00664	Mver_12065	Mver_12335 Mvib_comp11336_c2_seq1_m15209	Mvib_comp14539_c0_seq2_m29099	Mvib_comp161738_c0_seq1_m45687
OG0000308 Acas_g258	Acas_g3113	Acas_g3207 Aque_XP_003385014	Aque_XP_003387892 Atha_AT1G09030	Atha_AT1G21970	Atha_AT2G13570	Atha_AT2G27470	Atha_AT2G37060	Atha_AT2G38880	Atha_AT2G47810	Atha_AT3G53340	Atha_AT4G14540	Atha_AT5G08190	Atha_AT5G23090	Atha_AT5G47640	Atha_AT5G47670 Awhi_Unigene20690_m14284	Awhi_Unigene35548_m22648	Awhi_Unigene36206_m23366 Cang_117064	Cang_120417	Cang_58858	Cang_64971 Cfra_1280T1	Cfra_1301T1	Cfra_1362T1 Clim_g5980	Clim_g6435	Clim_g994 Cowc_CAOG_01593	Cowc_CAOG_02118	Cowc_CAOG_04030 Nk52_evm1s164	Nk52_evm2s214	Nk52_evm35s2612 Ddis_XP_641617	Ddis_XP_645298	Ddis_XP_646136 Dmel_FBpp0080256	Dmel_FBpp0080827	Dmel_FBpp0099655 Ehux_232814	Ehux_235521	Ehux_237274	Ehux_254911	Ehux_256109	Ehux_58243 Falb_H696_00132T0	Falb_H696_02145T0 Hsap_ENSP00000240055	Hsap_ENSP00000359290	Hsap_ENSP00000363284 Ihof_2521	Ihof_6508	Ihof_8922 Mlei_ML105416a	Mlei_ML29312a	Mlei_ML31707a Mver_01063	Mver_01424	Mver_05238	Mver_08523 Mvib_comp11399_c0_seq1_m15451	Mvib_comp11399_c0_seq2_m15453	Mvib_comp14307_c0_seq1_m27810
OG0000309 Acas_g10248	Acas_g10386	Acas_g11671	Acas_g11841	Acas_g11842	Acas_g11999	Acas_g12459	Acas_g16299	Acas_g16543	Acas_g2872	Acas_g3717	Acas_g5715	Acas_g9282 Aque_XP_003383091	Aque_XP_003385071	Aque_XP_003387808	Aque_XP_003387809	Aque_XP_003391842 Atha_AT2G31320	Atha_AT4G02390	Atha_AT5G22470 Awhi_Unigene31704_m19154	Awhi_Unigene32338_m19796	Awhi_Unigene39873_m25514 Cfra_0569T1	Cfra_1491T1 Cowc_CAOG_03118	Cowc_CAOG_05786	Cowc_CAOG_07428 Ddis_XP_629373	Ddis_XP_629945	Ddis_XP_641722	Ddis_XP_647821 Dmel_FBpp0112608 Ehux_252629	Ehux_41396	Ehux_459854	Ehux_462832 Hsap_ENSP00000250416	Hsap_ENSP00000355759	Hsap_ENSP00000381740 Ihof_10686	Ihof_3802	Ihof_6416 Mlei_ML02971a	Mlei_ML02973a	Mlei_ML13205a	Mlei_ML1541114a	Mlei_ML42451a Mver_09572 Mvib_comp10910_c0_seq1_m13806	Mvib_comp9910_c0_seq1_m10970 Ngru_XP_002673125	Ngru_XP_002673370	Ngru_XP_002673922 Nvec_XP_001618445	Nvec_XP_001622074	Nvec_XP_001622076	Nvec_XP_001622077	Nvec_XP_001638543	Nvec_XP_001638875 Pgem_Unigene11712_Pirum_gemmatam7572	Pgem_Unigene13173_Pirum_gemmatam8506	Pgem_Unigene1372_Pirum_gemmatam1073	Pgem_Unigene14269_Pirum_gemmatam9173	Pgem_Unigene20154_Pirum_gemmatam13123
OG0000310 Acas_g11760	Acas_g15452	Acas_g15933	Acas_g17777	Acas_g3151	Acas_g4989 Aque_XP_003384714	Aque_XP_003386232 Atha_AT2G40700	Atha_AT3G18600	Atha_AT5G54910	Atha_AT5G65900 Awhi_Unigene35092_m22172	Awhi_Unigene39835_m25489	Awhi_Unigene655_m641 Cang_110820	Cang_139730	Cang_91654 Cfra_3536T1	Cfra_4724T1	Cfra_7766T1 Clim_g275	Clim_g3007	Clim_g565 Cowc_CAOG_00063	Cowc_CAOG_03593	Cowc_CAOG_06316 Nk52_evm1s659	Nk52_evm20s238	Nk52_evm66s78 Ddis_XP_638786	Ddis_XP_640236	Ddis_XP_645498 Dmel_FBpp0074214	Dmel_FBpp0074227	Dmel_FBpp0083572 Ehux_252213	Ehux_418435	Ehux_55447	Ehux_64940	Ehux_71837 Falb_H696_00842T0	Falb_H696_04010T0	Falb_H696_04010T1	Falb_H696_05211T0 Hsap_ENSP00000263239	Hsap_ENSP00000314348	Hsap_ENSP00000361232 Ihof_2283	Ihof_2432	Ihof_6051	Ihof_9573 Mlei_ML01745a	Mlei_ML218948a	Mlei_ML28561a Mver_03039	Mver_06642	Mver_09752 Mvib_comp13096_c0_seq1_m21919	Mvib_comp15452_c0_seq1_m35284	Mvib_comp15452_c0_seq2_m35286	Mvib_comp15452_c2_seq1_m35288	Mvib_comp187851_c0_seq1_m46028	Mvib_comp4056_c0_seq1_m2003 Ngru_XP_002669503	Ngru_XP_002678515	Ngru_XP_002680910	Ngru_XP_002683113
OG0000311 Acas_g10744	Acas_g12170	Acas_g12899	Acas_g14068	Acas_g3910 Aque_XP_003386804	Aque_XP_003387614	Aque_XP_003388364	Aque_XP_003388578	Aque_XP_003388855	Aque_XP_003390931	Aque_XP_003391117 Awhi_Unigene17735_m11628 Cang_120144	Cang_139790	Cang_33646	Cang_65079 Cfra_0424T1	Cfra_7618T1	Cfra_8440T1 Clim_g5675 Cowc_CAOG_04148 Nk52_evm11s348	Nk52_evm15s32	Nk52_evm1s628	Nk52_evm9s1178 Dmel_FBpp0074038	Dmel_FBpp0084420	Dmel_FBpp0089026 Ehux_108768	Ehux_205708	Ehux_205709	Ehux_431884	Ehux_439772	Ehux_440515	Ehux_442345	Ehux_463751 Falb_H696_02095T0	Falb_H696_03226T0 Hsap_ENSP00000262545	Hsap_ENSP00000268171	Hsap_ENSP00000300954	Hsap_ENSP00000305056	Hsap_ENSP00000308024	Hsap_ENSP00000325917	Hsap_ENSP00000446280 Ihof_1161	Ihof_7265 Mlei_ML07022a	Mlei_ML11682a	Mlei_ML200226a	Mlei_ML20261a	Mlei_ML207912a	Mlei_ML279823a Mver_00862	Mver_00863 Mvib_comp14048_c0_seq1_m26362	Mvib_comp15015_c0_seq1_m32017	Mvib_comp15015_c0_seq2_m32018	Mvib_comp15015_c1_seq1_m32019	Mvib_comp15015_c1_seq2_m32022 Ngru_XP_002682821 Nvec_XP_001617789	Nvec_XP_001621887	Nvec_XP_001624392	Nvec_XP_001625427	Nvec_XP_001630912
OG0000312 Acas_g4845	Acas_g9934 Aque_XP_003385444	Aque_XP_003385445	Aque_XP_003385797 Atha_AT1G02630	Atha_AT1G61630	Atha_AT1G70330	Atha_AT3G09990	Atha_AT4G05110	Atha_AT4G05120	Atha_AT4G05130	Atha_AT4G05140 Awhi_Unigene20407_m14028	Awhi_Unigene33080_m20477	Awhi_Unigene33081_m20478	Awhi_Unigene3726_m2780 Cang_26488	Cang_44998 Cfra_5208T1	Cfra_5372T1 Clim_g4205	Clim_g4808 Cowc_CAOG_00183	Cowc_CAOG_02889 Nk52_evm11s1869	Nk52_evm43s152	Nk52_evm43s239	Nk52_evm63s1810	Nk52_evm84s207 Ddis_XP_639074	Ddis_XP_640728	Ddis_XP_640729 Dmel_FBpp0075667	Dmel_FBpp0077753	Dmel_FBpp0078920 Ehux_425361	Ehux_438250	Ehux_438251	Ehux_446300	Ehux_463352 Falb_H696_04362T0 Hsap_ENSP00000297195	Hsap_ENSP00000319152	Hsap_ENSP00000350024	Hsap_ENSP00000362285	Hsap_ENSP00000447712	Hsap_ENSP00000449119 Ihof_4900	Ihof_7038	Ihof_7039	Ihof_7052 Mlei_ML01177a	Mlei_ML02255a	Mlei_ML05611a	Mlei_ML067024a	Mlei_ML10792a	Mlei_ML141749a	Mlei_ML174744a Mver_10960 Mvib_comp11532_c0_seq1_m15936	Mvib_comp11532_c1_seq1_m15938	Mvib_comp13881_c0_seq1_m25527	Mvib_comp13881_c0_seq1_m25530	Mvib_comp13881_c0_seq2_m25531	Mvib_comp13881_c0_seq3_m25534	Mvib_comp13881_c0_seq3_m25536
OG0000313 Acas_g5648	Acas_g5679	Acas_g7053	Acas_g9859 Aque_XP_003386548	Aque_XP_003387703	Aque_XP_003388660	Aque_XP_003388661	Aque_XP_003389635	Aque_XP_003389804	Aque_XP_003390016	Aque_XP_003390017	Aque_XP_003390150	Aque_XP_003390819	Aque_XP_003391448 Atha_AT3G54840	Atha_AT4G19640	Atha_AT5G45130 Awhi_Unigene18009_m11960	Awhi_Unigene34618_m21657 Cang_38965 Cfra_7815T1 Clim_g6520 Cowc_CAOG_03438	Cowc_CAOG_04692	Cowc_CAOG_07693	Cowc_CAOG_08182 Nk52_evm56s217	Nk52_evm58s230 Ddis_XP_637605	Ddis_XP_639358	Ddis_XP_642644	Ddis_XP_645357 Dmel_FBpp0072029	Dmel_FBpp0077470	Dmel_FBpp0289181 Ehux_363221	Ehux_437972	Ehux_78922 Falb_H696_03121T0	Falb_H696_03789T0	Falb_H696_03789T1 Hsap_ENSP00000244040	Hsap_ENSP00000261263	Hsap_ENSP00000264601	Hsap_ENSP00000267328	Hsap_ENSP00000273047	Hsap_ENSP00000304565	Hsap_ENSP00000353444	Hsap_ENSP00000447053 Ihof_10020	Ihof_2313	Ihof_7033 Mlei_ML03267a	Mlei_ML057315a	Mlei_ML14992a Mver_01954	Mver_02196	Mver_04926	Mver_05304	Mver_11931 Mvib_comp13500_c0_seq1_m23660	Mvib_comp16193_c0_seq1_m43375	Mvib_comp16293_c0_seq1_m43397	Mvib_comp7793_c0_seq1_m6425	Mvib_comp8133_c0_seq1_m7066 Ngru_XP_002670122	Ngru_XP_002681606
OG0000314 Acas_g6232 Aque_XP_003384886	Aque_XP_003384915	Aque_XP_003384916 Atha_AT2G29410	Atha_AT2G46800	Atha_AT3G58810	Atha_AT3G61940 Awhi_Unigene19488_m13187	Awhi_Unigene19489_m13188	Awhi_Unigene20925_m14508 Cang_30276	Cang_46815 Cfra_1643T1	Cfra_7913T1 Clim_g6287 Cowc_CAOG_01736	Cowc_CAOG_05315	Cowc_CAOG_06217 Nk52_evm10s235	Nk52_evm14s136	Nk52_evm20s2426 Ddis_XP_638925	Ddis_XP_640445 Dmel_FBpp0072918	Dmel_FBpp0077878	Dmel_FBpp0079922	Dmel_FBpp0080274	Dmel_FBpp0085389 Ehux_414632	Ehux_42691	Ehux_468178	Ehux_53810 Falb_H696_00973T0	Falb_H696_04176T0 Hsap_ENSP00000233535	Hsap_ENSP00000261867	Hsap_ENSP00000355893	Hsap_ENSP00000355968	Hsap_ENSP00000363394	Hsap_ENSP00000415011 Ihof_3002	Ihof_9248 Mlei_ML11593a	Mlei_ML21891a	Mlei_ML327436a Mver_01353	Mver_02832	Mver_11963 Mvib_comp15541_c2_seq1_m36148	Mvib_comp15541_c2_seq2_m36149	Mvib_comp9405_c1_seq1_m9811 Ngru_XP_002669897	Ngru_XP_002682376 Nvec_XP_001622654	Nvec_XP_001635675	Nvec_XP_001640920 Pgem_Unigene19132_Pirum_gemmatam12364	Pgem_Unigene840_Pirum_gemmatam687 Pyez_14119_g3384	Pyez_22786_g5626	Pyez_30803_g7533 Sarc4_g10600T	Sarc4_g13981T	Sarc4_g22938T	Sarc4_g23102T	Sarc4_g24992T	Sarc4_g26885T	Sarc4_g26985T	Sarc4_g2884T	Sarc4_g29441T	Sarc4_g30317T
OG0000315 Acas_g14528	Acas_g6855 Aque_XP_003389522 Atha_AT1G06900	Atha_AT2G41790	Atha_AT3G57470 Awhi_Unigene29406_m17943	Awhi_Unigene29407_m17944	Awhi_Unigene36203_m23360	Awhi_Unigene37100_m24017	Awhi_Unigene500_m509	Awhi_Unigene8466_m5656	Awhi_Unigene8467_m5658	Awhi_Unigene8468_m5659 Cfra_0265T1	Cfra_2940T1	Cfra_7370T1 Clim_g548	Clim_g631 Cowc_CAOG_03627	Cowc_CAOG_04239	Cowc_CAOG_05520 Nk52_evm24s238	Nk52_evm37s1073	Nk52_evm3s238 Ddis_XP_637100 Dmel_FBpp0073438	Dmel_FBpp0077942	Dmel_FBpp0271781 Ehux_110328	Ehux_124711	Ehux_125095	Ehux_449448	Ehux_449760	Ehux_461074	Ehux_471473	Ehux_64052	Ehux_65626	Ehux_74243	Ehux_74380	Ehux_97098 Falb_H696_04782T0 Hsap_ENSP00000265986	Hsap_ENSP00000346890 Ihof_2991	Ihof_3423	Ihof_5556	Ihof_7712	Ihof_8142	Ihof_8628 Mlei_ML034633a	Mlei_ML034634a	Mlei_ML104639a	Mlei_ML104641a	Mlei_ML104642a	Mlei_ML128218a	Mlei_ML189344a Mver_05601	Mver_06611 Mvib_comp10820_c0_seq1_m13502	Mvib_comp11486_c1_seq1_m15763	Mvib_comp11486_c2_seq1_m15764	Mvib_comp6740_c1_seq1_m4549	Mvib_comp9043_c0_seq1_m8960	Mvib_comp9415_c0_seq1_m9836	Mvib_comp9612_c1_seq1_m10245
OG0000316 Acas_g12068	Acas_g1260	Acas_g3025	Acas_g3941	Acas_g7865	Acas_g8738 Aque_XP_003385270	Aque_XP_003386944	Aque_XP_003386945 Atha_AT1G07420	Atha_AT2G29390	Atha_AT4G12110	Atha_AT4G22753	Atha_AT4G22756 Awhi_Unigene18587_m12602	Awhi_Unigene7866_m4973 Cang_140798	Cang_385072	Cang_41271	Cang_45023 Cfra_5300T1	Cfra_5371T1	Cfra_6886T1 Clim_g2347	Clim_g2682	Clim_g2713	Clim_g5177	Clim_g5510 Cowc_CAOG_05332	Cowc_CAOG_07134 Nk52_evm1s296	Nk52_evm2s2325	Nk52_evm34s233	Nk52_evm51s2039	Nk52_evm76s151 Ddis_XP_002649198	Ddis_XP_641553	Ddis_XP_646277 Dmel_FBpp0073618	Dmel_FBpp0073642 Ehux_359966	Ehux_361612	Ehux_46014	Ehux_46060	Ehux_56623	Ehux_69373	Ehux_73824 Falb_H696_03028T0 Hsap_ENSP00000261507	Hsap_ENSP00000320604	Hsap_ENSP00000360918 Ihof_10654	Ihof_10655	Ihof_4659 Mlei_ML004410a	Mlei_ML004412a Mver_03025	Mver_09108 Mvib_comp10093_c0_seq1_m11415	Mvib_comp13608_c0_seq1_m24216	Mvib_comp15090_c0_seq2_m32521	Mvib_comp15090_c0_seq4_m32523	Mvib_comp6355_c0_seq1_m4149	Mvib_comp9806_c0_seq1_m10728 Ngru_XP_002668883	Ngru_XP_002670136	Ngru_XP_002671104	Ngru_XP_002674519
OG0000317 Acas_g12962	Acas_g2415 Ddis_XP_001732962	Ddis_XP_001732963	Ddis_XP_001732964	Ddis_XP_001732967	Ddis_XP_001733001	Ddis_XP_001733037	Ddis_XP_628865	Ddis_XP_628867	Ddis_XP_629652	Ddis_XP_635303	Ddis_XP_635304	Ddis_XP_635490	Ddis_XP_635494	Ddis_XP_635518	Ddis_XP_635575	Ddis_XP_635580	Ddis_XP_635588	Ddis_XP_635589	Ddis_XP_635590	Ddis_XP_635593	Ddis_XP_635742	Ddis_XP_636757	Ddis_XP_637425	Ddis_XP_637427	Ddis_XP_638811	Ddis_XP_638813	Ddis_XP_640415	Ddis_XP_640701	Ddis_XP_643361	Ddis_XP_643362	Ddis_XP_643393	Ddis_XP_643784	Ddis_XP_643790	Ddis_XP_644907	Ddis_XP_644930	Ddis_XP_644952	Ddis_XP_645557	Ddis_XP_645909	Ddis_XP_646104	Ddis_XP_646445 Dmel_FBpp0077342	Dmel_FBpp0288532	Dmel_FBpp0290992 Ehux_108933	Ehux_116982	Ehux_198208	Ehux_198209	Ehux_198210	Ehux_198211	Ehux_198212	Ehux_198215
OG0000318 Acas_g13977	Acas_g3496 Aque_XP_003384478 Atha_AT1G05790	Atha_AT2G42450	Atha_AT3G14075	Atha_AT3G49050	Atha_AT4G00500	Atha_AT4G16070	Atha_AT5G37710 Awhi_Unigene11008_m7315	Awhi_Unigene11514_m7534	Awhi_Unigene2435_m1742	Awhi_Unigene28936_m17540	Awhi_Unigene31321_m18763	Awhi_Unigene35632_m22727	Awhi_Unigene35633_m22728	Awhi_Unigene36977_m23937	Awhi_Unigene36978_m23938	Awhi_Unigene36979_m23939	Awhi_Unigene3841_m2877	Awhi_Unigene3842_m2878	Awhi_Unigene40618_m25976	Awhi_Unigene637_m616	Awhi_Unigene9693_m6732 Cang_166322	Cang_24819	Cang_273781 Cfra_0064T1	Cfra_0255T1	Cfra_3182T1	Cfra_6619T1	Cfra_6851T1	Cfra_7101T1 Clim_g3038	Clim_g4321	Clim_g6325	Clim_g6598 Cowc_CAOG_05624 Nk52_evm24s152	Nk52_evm70s1737 Ddis_XP_635159	Ddis_XP_636034	Ddis_XP_642191 Dmel_FBpp0288741 Ehux_205378	Ehux_459552 Hsap_ENSP00000257215	Hsap_ENSP00000297056 Ihof_4303	Ihof_6186	Ihof_7633	Ihof_9565 Mlei_ML12863a	Mlei_ML154139a Mver_03935	Mver_04948	Mver_06371	Mver_07864	Mver_10222 Mvib_comp2678_c0_seq1_m927	Mvib_comp7367_c0_seq1_m5643	Mvib_comp7367_c1_seq1_m5647	Mvib_comp8580_c0_seq1_m7994	Mvib_comp9412_c1_seq1_m9827 Ngru_XP_002676956	Ngru_XP_002679375 Nvec_XP_001635773
OG0000319 Acas_g10173	Acas_g13048	Acas_g4790	Acas_g9838 Aque_XP_003385020	Aque_XP_003385474	Aque_XP_003386634	Aque_XP_003389318	Aque_XP_003391853 Atha_AT3G24430	Atha_AT4G19540	Atha_AT5G50960 Awhi_Unigene1090_m1079	Awhi_Unigene38146_m24785	Awhi_Unigene39561_m25324	Awhi_Unigene656_m642 Cang_148075	Cang_34655	Cang_49149 Cfra_5572T1	Cfra_7196T1	Cfra_8146T1	Cfra_8288T1 Clim_g1174	Clim_g3449	Clim_g6226 Cowc_CAOG_04035	Cowc_CAOG_04115	Cowc_CAOG_07958	Cowc_CAOG_08134 Nk52_evm31s215	Nk52_evm3s402	Nk52_evm5s1020	Nk52_evm5s314 Ddis_XP_635375	Ddis_XP_638240	Ddis_XP_642627	Ddis_XP_642797 Dmel_FBpp0077868	Dmel_FBpp0080448	Dmel_FBpp0289153 Ehux_415743	Ehux_434386	Ehux_43814	Ehux_70127 Falb_H696_00320T0	Falb_H696_04170T0	Falb_H696_04995T0 Hsap_ENSP00000262302	Hsap_ENSP00000281081	Hsap_ENSP00000283027 Ihof_1709	Ihof_7764 Mlei_ML07556a	Mlei_ML14251a Mver_05529	Mver_08249	Mver_09963 Mvib_comp10362_c0_seq1_m12168	Mvib_comp4693_c0_seq1_m2635	Mvib_comp7335_c0_seq1_m5573	Mvib_comp7335_c0_seq2_m5574	Mvib_comp8968_c0_seq1_m8801 Ngru_XP_002676125	Ngru_XP_002679244	Ngru_XP_002683161 Nvec_XP_001620648	Nvec_XP_001630170	Nvec_XP_001635464
OG0000320 Acas_g4997 Aque_XP_003383398	Aque_XP_003384978	Aque_XP_003391775 Atha_AT2G43240	Atha_AT3G59360	Atha_AT4G35335	Atha_AT5G41760 Awhi_Unigene12066_m7794	Awhi_Unigene14882_m9360	Awhi_Unigene20228_m13869	Awhi_Unigene23024_m15297	Awhi_Unigene29068_m17652	Awhi_Unigene35604_m22702	Awhi_Unigene39489_m25278	Awhi_Unigene41652_m26554	Awhi_Unigene42739_m27179 Cang_318575	Cang_58779 Cfra_0647T1	Cfra_1648T1	Cfra_4914T1	Cfra_6718T1 Clim_g418	Clim_g5195 Cowc_CAOG_01543	Cowc_CAOG_05387 Nk52_evm25s2309 Dmel_FBpp0271784 Ehux_107320	Ehux_115029	Ehux_124279	Ehux_194633	Ehux_194646	Ehux_200954	Ehux_202843	Ehux_211154	Ehux_226040	Ehux_227219	Ehux_230260	Ehux_230385	Ehux_231751	Ehux_242180	Ehux_430220	Ehux_433500	Ehux_442267	Ehux_442589	Ehux_450113	Ehux_456989	Ehux_458990	Ehux_465098	Ehux_469238	Ehux_62094	Ehux_62969	Ehux_75222	Ehux_94935	Ehux_95469	Ehux_96775 Falb_H696_04448T0	Falb_H696_04894T0 Hsap_ENSP00000327133	Hsap_ENSP00000358565
OG0000321 Acas_g1444	Acas_g5531	Acas_g8644 Aque_XP_003385960	Aque_XP_003387632	Aque_XP_003388193	Aque_XP_003388194	Aque_XP_003388195	Aque_XP_003389138	Aque_XP_003389139	Aque_XP_003390999	Aque_XP_003391685 Atha_AT1G20720	Atha_AT1G20750	Atha_AT1G79890	Atha_AT1G79950	Atha_AT2G05635 Awhi_Unigene14873_m9354	Awhi_Unigene21335_m14784	Awhi_Unigene24029_m15733	Awhi_Unigene27092_m16561	Awhi_Unigene37735_m24466 Cang_119192	Cang_49275	Cang_57935	Cang_73533	Cang_79357 Cfra_2088T1	Cfra_6495T1 Clim_g2786	Clim_g4137	Clim_g6236 Cowc_CAOG_02709	Cowc_CAOG_03975	Cowc_CAOG_07120	Cowc_CAOG_07562 Nk52_evm21s243	Nk52_evm4s148 Ddis_XP_637574 Dmel_FBpp0070235	Dmel_FBpp0070773 Ehux_121914	Ehux_198134	Ehux_417368 Falb_H696_00722T0	Falb_H696_02176T0	Falb_H696_04026T0 Hsap_ENSP00000259008	Hsap_ENSP00000322287	Hsap_ENSP00000353332	Hsap_ENSP00000384703 Ihof_1156	Ihof_1458	Ihof_3480	Ihof_3691	Ihof_6515	Ihof_7995	Ihof_9052 Mlei_ML00453a	Mlei_ML00454a	Mlei_ML267512a	Mlei_ML311632a Mver_04345	Mver_09156 Mvib_comp10035_c2_seq1_m11268	Mvib_comp10772_c0_seq1_m13386	Mvib_comp10772_c4_seq1_m13388
OG0000322 Acas_g14178	Acas_g17098	Acas_g17710	Acas_g2411	Acas_g9185 Aque_XP_003386342	Aque_XP_003386343	Aque_XP_003386344 Atha_AT1G05940	Atha_AT1G17120	Atha_AT1G58030	Atha_AT2G34960	Atha_AT3G03720	Atha_AT3G03726	Atha_AT3G03730	Atha_AT3G10600	Atha_AT3G22345	Atha_AT4G12810	Atha_AT4G21120	Atha_AT5G04770	Atha_AT5G36940 Awhi_Unigene23220_m15346	Awhi_Unigene32773_m20200	Awhi_Unigene41693_m26579	Awhi_Unigene42606_m27104 Cang_101108	Cang_118726	Cang_123146	Cang_126398	Cang_127871	Cang_138832	Cang_138847	Cang_139291	Cang_159380	Cang_47289 Cfra_3384T1	Cfra_6741T1 Nk52_evm14s358	Nk52_evm1s261	Nk52_evm5s324	Nk52_evm6s358	Nk52_evm75s1073	Nk52_evm8s261	Nk52_evm9s239 Ddis_XP_635241	Ddis_XP_635342	Ddis_XP_641447 Dmel_FBpp0074557	Dmel_FBpp0077892	Dmel_FBpp0078206	Dmel_FBpp0099766	Dmel_FBpp0271785 Falb_H696_00294T0 Hsap_ENSP00000004531	Hsap_ENSP00000231706	Hsap_ENSP00000298085	Hsap_ENSP00000370128	Hsap_ENSP00000372390 Ihof_10528	Ihof_3076	Ihof_5695 Mlei_ML045215a
OG0000323 Acas_g15736	Acas_g16930	Acas_g5280	Acas_g6926 Atha_AT1G05000	Atha_AT2G32960	Atha_AT3G02800	Atha_AT4G03960	Atha_AT5G16480 Awhi_Unigene12644_m8163	Awhi_Unigene20643_m14243	Awhi_Unigene28932_m17537	Awhi_Unigene29764_m18261	Awhi_Unigene38228_m24839 Cang_103675	Cang_158514	Cang_37911	Cang_41715	Cang_98693 Cfra_0126T1	Cfra_2723T1	Cfra_5261T1	Cfra_7409T1	Cfra_7756T1 Clim_g2160	Clim_g2831	Clim_g4026	Clim_g5196 Cowc_CAOG_02215	Cowc_CAOG_04657	Cowc_CAOG_07411	Cowc_CAOG_07929	Cowc_CAOG_08342	Cowc_CAOG_08421 Nk52_evm10s366	Nk52_evm20s2011	Nk52_evm20s2391	Nk52_evm2s153	Nk52_evm56s2391 Ddis_XP_001134556	Ddis_XP_637998	Ddis_XP_638222	Ddis_XP_641226 Ehux_245682	Ehux_47311	Ehux_57384	Ehux_58525	Ehux_62039	Ehux_71231	Ehux_76826	Ehux_78296 Falb_H696_02475T0	Falb_H696_03948T0	Falb_H696_04593T0	Falb_H696_04917T0 Ihof_5006	Ihof_507	Ihof_8576	Ihof_9801 Mver_01940	Mver_06719	Mver_07595
OG0000324 Acas_g12757	Acas_g13257	Acas_g8383 Aque_XP_003386663	Aque_XP_003391695 Atha_AT1G25500	Atha_AT3G15380	Atha_AT4G38640	Atha_AT5G13760 Awhi_Unigene3212_m2367	Awhi_Unigene3213_m2369 Cang_124330	Cang_28663	Cang_34434	Cang_42823	Cang_59950	Cang_59951	Cang_90847 Cfra_0681T1 Clim_g109	Clim_g4579 Cowc_CAOG_03133	Cowc_CAOG_04889 Nk52_evm7s358 Ddis_XP_636423	Ddis_XP_636594	Ddis_XP_644127	Ddis_XP_646443 Dmel_FBpp0073088	Dmel_FBpp0084740 Ehux_109115	Ehux_204772	Ehux_207056	Ehux_217649	Ehux_218054	Ehux_218208	Ehux_218831	Ehux_227494	Ehux_438674	Ehux_450619	Ehux_458914	Ehux_464382	Ehux_99852 Falb_H696_04210T0 Hsap_ENSP00000229729	Hsap_ENSP00000271227	Hsap_ENSP00000336888	Hsap_ENSP00000363852	Hsap_ENSP00000389244	Hsap_ENSP00000440581	Hsap_ENSP00000447599	Hsap_ENSP00000449674 Ihof_9339	Ihof_9456 Mlei_ML351721a Mver_03122	Mver_04824	Mver_05955	Mver_09176	Mver_09665	Mver_10692	Mver_11744 Mvib_comp13382_c0_seq1_m23145	Mvib_comp13382_c1_seq1_m23147	Mvib_comp14318_c0_seq1_m27854	Mvib_comp14318_c0_seq2_m27855 Ngru_XP_002670310	Ngru_XP_002681381 Nvec_XP_001621333
OG0000325 Acas_g3961	Acas_g576 Aque_XP_003388079 Atha_AT1G12500	Atha_AT1G21870	Atha_AT1G43310	Atha_AT1G61800	Atha_AT1G77610	Atha_AT3G01550	Atha_AT3G10290	Atha_AT3G11320	Atha_AT4G03950	Atha_AT5G04160	Atha_AT5G05820	Atha_AT5G17630	Atha_AT5G33320	Atha_AT5G46110	Atha_AT5G54800 Awhi_Unigene23946_m15686	Awhi_Unigene24238_m15818	Awhi_Unigene32071_m19518	Awhi_Unigene34749_m21805	Awhi_Unigene36493_m23609 Cang_34866 Cfra_6936T1 Clim_g2177	Clim_g247 Cowc_CAOG_07473 Nk52_evm72s270 Ddis_XP_002649139	Ddis_XP_637234 Dmel_FBpp0077036 Ehux_112805	Ehux_200599	Ehux_212920	Ehux_223038	Ehux_237476	Ehux_255356	Ehux_258161	Ehux_352050	Ehux_360465	Ehux_416626	Ehux_418314	Ehux_42888	Ehux_432785	Ehux_433656	Ehux_437283	Ehux_438986	Ehux_440029	Ehux_451082	Ehux_451704	Ehux_453445	Ehux_460932	Ehux_461783	Ehux_462391	Ehux_464105	Ehux_467518	Ehux_469681	Ehux_469711	Ehux_53405	Ehux_74327
OG0000326 Acas_g2116 Aque_XP_003383907	Aque_XP_003384274 Atha_AT1G15080	Atha_AT2G01180	Atha_AT3G02600	Atha_AT3G18220 Awhi_Unigene20275_m13904	Awhi_Unigene20441_m14056	Awhi_Unigene34917_m21989	Awhi_Unigene750_m752 Cang_36911	Cang_38363	Cang_38364	Cang_38750 Cfra_0810T1	Cfra_1338T1	Cfra_6922T1	Cfra_7827T1 Clim_g1401	Clim_g300 Cowc_CAOG_03169 Nk52_evm10s1020	Nk52_evm2s2133	Nk52_evm2s366 Ddis_XP_638587	Ddis_XP_643505	Ddis_XP_645555 Dmel_FBpp0078156	Dmel_FBpp0078157	Dmel_FBpp0078158	Dmel_FBpp0078159	Dmel_FBpp0078160	Dmel_FBpp0078338	Dmel_FBpp0087590	Dmel_FBpp0087635 Ehux_193908	Ehux_210687	Ehux_242228	Ehux_445286	Ehux_95636 Falb_H696_03102T0 Hsap_ENSP00000251473	Hsap_ENSP00000263177	Hsap_ENSP00000264775	Hsap_ENSP00000329697	Hsap_ENSP00000352962	Hsap_ENSP00000359204	Hsap_ENSP00000360296	Hsap_ENSP00000364005	Hsap_ENSP00000381302	Hsap_ENSP00000392553 Ihof_4351	Ihof_4837	Ihof_5674 Mlei_ML039723a	Mlei_ML078938a	Mlei_ML086628a	Mlei_ML086629a	Mlei_ML218945a Mver_04140	Mver_04875	Mver_05089	Mver_10744 Mvib_comp426_c0_seq1_m242	Mvib_comp8362_c0_seq1_m7529	Mvib_comp8362_c0_seq2_m7530 Ngru_XP_002676334 Nvec_XP_001625590
OG0000327 Acas_g10902	Acas_g16980	Acas_g8819 Aque_XP_003385459	Aque_XP_003388114	Aque_XP_003390549	Aque_XP_003390550 Awhi_Unigene19050_m12771	Awhi_Unigene31699_m19148	Awhi_Unigene32539_m19980 Cang_35018	Cang_43348	Cang_45729	Cang_63482 Cfra_3126T1	Cfra_7573T1 Clim_g27	Clim_g5716	Clim_g6933 Cowc_CAOG_00499	Cowc_CAOG_02350	Cowc_CAOG_05023 Nk52_evm120s485	Nk52_evm28s2462	Nk52_evm86s62 Dmel_FBpp0070170	Dmel_FBpp0083302	Dmel_FBpp0086837	Dmel_FBpp0288460 Ehux_228184	Ehux_234407	Ehux_254578	Ehux_451329 Falb_H696_02252T0	Falb_H696_02254T0	Falb_H696_04519T0	Falb_H696_04521T0 Hsap_ENSP00000263182	Hsap_ENSP00000335261 Ihof_8052	Ihof_8206 Mlei_ML02458a	Mlei_ML13175a	Mlei_ML13176a	Mlei_ML21641a Mver_07089	Mver_09619	Mver_11258 Mvib_comp14325_c0_seq1_m27881	Mvib_comp14325_c0_seq2_m27884	Mvib_comp14325_c0_seq3_m27888	Mvib_comp14325_c0_seq4_m27891	Mvib_comp15154_c0_seq1_m32920	Mvib_comp15154_c0_seq2_m32922	Mvib_comp7450_c0_seq1_m5768 Ngru_XP_002675261 Nvec_XP_001623702	Nvec_XP_001625952	Nvec_XP_001627590	Nvec_XP_001628803	Nvec_XP_001628804	Nvec_XP_001628833	Nvec_XP_001629353	Nvec_XP_001632023	Nvec_XP_001632466	Nvec_XP_001632467 Pgem_Unigene28450_Pirum_gemmatam17003	Pgem_Unigene28451_Pirum_gemmatam17004
OG0000328 Acas_g10665	Acas_g12042	Acas_g9096 Aque_XP_003388534	Aque_XP_003388535	Aque_XP_003388536	Aque_XP_003388537	Aque_XP_003388538	Aque_XP_003388539	Aque_XP_003391022	Aque_XP_003391042	Aque_XP_003391043	Aque_XP_003391044	Aque_XP_003391045 Awhi_Unigene20832_m14419	Awhi_Unigene25324_m16184	Awhi_Unigene26829_m16482 Cang_39281	Cang_55254	Cang_79910 Cfra_2143T1	Cfra_4613T1 Clim_g1412	Clim_g199 Cowc_CAOG_01179	Cowc_CAOG_02585	Cowc_CAOG_05791	Cowc_CAOG_07038	Cowc_CAOG_07039	Cowc_CAOG_07040 Nk52_evm23s239	Nk52_evm33s1444 Ddis_XP_629250	Ddis_XP_640317	Ddis_XP_646672	Ddis_XP_647257 Dmel_FBpp0072173	Dmel_FBpp0084990	Dmel_FBpp0085006	Dmel_FBpp0271895 Ehux_120857	Ehux_221473 Falb_H696_01041T0 Hsap_ENSP00000340409	Hsap_ENSP00000357425	Hsap_ENSP00000363001 Ihof_5499 Mlei_ML00258a	Mlei_ML02195a	Mlei_ML167023a	Mlei_ML279622a	Mlei_ML47131a Mver_05065	Mver_06734	Mver_07246	Mver_07292	Mver_07293	Mver_08724	Mver_09514 Mvib_comp13519_c1_seq1_m23798	Mvib_comp14489_c0_seq1_m28755	Mvib_comp14598_c0_seq1_m29439	Mvib_comp15947_c0_seq1_m41617 Ngru_XP_002674771	Ngru_XP_002680147 Nvec_XP_001623308	Nvec_XP_001638937	Nvec_XP_001639056 Pgem_Unigene1268_Pirum_gemmatam1007
OG0000329 Aque_XP_003382414	Aque_XP_003384174	Aque_XP_003384645	Aque_XP_003392089 Atha_AT1G30450 Awhi_Unigene18595_m12614	Awhi_Unigene19227_m12937	Awhi_Unigene35574_m22679	Awhi_Unigene7158_m4202 Cang_149212	Cang_336316	Cang_48931	Cang_65835 Cfra_1336T1	Cfra_2671T1	Cfra_3652T1 Clim_g5058	Clim_g762 Cowc_CAOG_00967	Cowc_CAOG_04247	Cowc_CAOG_04602 Nk52_evm1s1837	Nk52_evm20s233	Nk52_evm47s240	Nk52_evm4s2273 Dmel_FBpp0070226	Dmel_FBpp0072046	Dmel_FBpp0075719	Dmel_FBpp0078411	Dmel_FBpp0080630 Ehux_357673	Ehux_438821	Ehux_445837	Ehux_456824	Ehux_464975 Hsap_ENSP00000262461	Hsap_ENSP00000262502	Hsap_ENSP00000264930	Hsap_ENSP00000275730	Hsap_ENSP00000346112	Hsap_ENSP00000370381	Hsap_ENSP00000387694	Hsap_ENSP00000395983	Hsap_ENSP00000404243 Ihof_10052	Ihof_3237	Ihof_4655 Mlei_ML04002a	Mlei_ML05601a	Mlei_ML079719a	Mlei_ML09861a	Mlei_ML11595a	Mlei_ML17301a	Mlei_ML17303a Mver_11314 Mvib_comp12843_c0_seq1_m20692	Mvib_comp12843_c0_seq2_m20697	Mvib_comp15252_c0_seq1_m33678 Ngru_XP_002675623 Nvec_XP_001620852	Nvec_XP_001627543	Nvec_XP_001633454	Nvec_XP_001633980	Nvec_XP_001638493	Nvec_XP_001641424 Pgem_Unigene19913_Pirum_gemmatam12944	Pgem_Unigene19914_Pirum_gemmatam12946
OG0000330 Aque_XP_003384557	Aque_XP_003384878	Aque_XP_003385535	Aque_XP_003386160	Aque_XP_003389333	Aque_XP_003390605	Aque_XP_003390719	Aque_XP_003390824	Aque_XP_003391183	Aque_XP_003391322	Aque_XP_003391465	Aque_XP_003391572	Aque_XP_003391915	Aque_XP_003391978 Ddis_XP_001733016	Ddis_XP_638039 Dmel_FBpp0076517	Dmel_FBpp0099389	Dmel_FBpp0288716 Hsap_ENSP00000246006	Hsap_ENSP00000308117	Hsap_ENSP00000366307	Hsap_ENSP00000369816	Hsap_ENSP00000377783	Hsap_ENSP00000384169	Hsap_ENSP00000385521	Hsap_ENSP00000404464 Ihof_10550 Mlei_ML019111a	Mlei_ML056914a	Mlei_ML19192a Mvib_comp14213_c0_seq1_m27278	Mvib_comp15501_c5_seq2_m35732	Mvib_comp15501_c5_seq3_m35734	Mvib_comp15667_c4_seq5_m37456	Mvib_comp15667_c4_seq6_m37460	Mvib_comp15893_c4_seq1_m40598	Mvib_comp190891_c0_seq1_m46110	Mvib_comp262542_c0_seq1_m46711	Mvib_comp434697_c0_seq1_m47585 Nvec_XP_001618495	Nvec_XP_001620342	Nvec_XP_001620487	Nvec_XP_001620920	Nvec_XP_001622188	Nvec_XP_001622699	Nvec_XP_001623589	Nvec_XP_001626783	Nvec_XP_001628372	Nvec_XP_001629351	Nvec_XP_001630020	Nvec_XP_001630853	Nvec_XP_001636480	Nvec_XP_001636534	Nvec_XP_001636759	Nvec_XP_001637606	Nvec_XP_001638087
OG0000331 Aque_XP_003385034	Aque_XP_003386574	Aque_XP_003386807	Aque_XP_003388774	Aque_XP_003388863	Aque_XP_003389314	Aque_XP_003389853 Cfra_5679T1 Clim_g4848 Cowc_CAOG_03596	Cowc_CAOG_07087 Nk52_evm19s226 Dmel_FBpp0070835	Dmel_FBpp0071677	Dmel_FBpp0071820	Dmel_FBpp0271930	Dmel_FBpp0288565	Dmel_FBpp0289018	Dmel_FBpp0290878 Ehux_206719	Ehux_463011 Hsap_ENSP00000005226	Hsap_ENSP00000221459	Hsap_ENSP00000239666	Hsap_ENSP00000256366	Hsap_ENSP00000263925	Hsap_ENSP00000278193	Hsap_ENSP00000282493	Hsap_ENSP00000302935	Hsap_ENSP00000325929	Hsap_ENSP00000354623	Hsap_ENSP00000357484	Hsap_ENSP00000377106	Hsap_ENSP00000387928	Hsap_ENSP00000447488 Mlei_ML02168a	Mlei_ML05292a	Mlei_ML070245a	Mlei_ML137710a	Mlei_ML13777a	Mlei_ML14423a	Mlei_ML182021a	Mlei_ML19762a	Mlei_ML343429a	Mlei_ML368927a Mvib_comp12130_c1_seq2_m17962	Mvib_comp14003_c0_seq1_m26139	Mvib_comp14888_c1_seq1_m31153	Mvib_comp14888_c3_seq1_m31155	Mvib_comp14888_c3_seq2_m31159	Mvib_comp14888_c3_seq3_m31163 Nvec_XP_001619181	Nvec_XP_001619341	Nvec_XP_001620052	Nvec_XP_001620235	Nvec_XP_001620405	Nvec_XP_001620406	Nvec_XP_001621304	Nvec_XP_001626928	Nvec_XP_001629542
OG0000332 Acas_g13167	Acas_g675 Aque_XP_003387450	Aque_XP_003387451 Atha_AT1G20380	Atha_AT1G50380	Atha_AT1G69020	Atha_AT1G76140	Atha_AT5G66960 Awhi_Unigene12760_m8250	Awhi_Unigene14596_m9199	Awhi_Unigene20141_m13786	Awhi_Unigene20142_m13787	Awhi_Unigene29914_m18403	Awhi_Unigene34375_m21409	Awhi_Unigene38171_m24799 Cang_121043	Cang_142641	Cang_43015	Cang_44966	Cang_75057	Cang_79095 Cfra_0088T1	Cfra_0526T1	Cfra_6464T1 Clim_g4690	Clim_g6225	Clim_g816 Cowc_CAOG_00384	Cowc_CAOG_03533 Nk52_evm29s221	Nk52_evm5s2133 Ddis_XP_629399	Ddis_XP_644295 Dmel_FBpp0079637	Dmel_FBpp0289398 Ehux_106837	Ehux_124610	Ehux_125530	Ehux_217738	Ehux_257720	Ehux_437321	Ehux_450620	Ehux_453180	Ehux_458072	Ehux_465719	Ehux_471180	Ehux_69975 Falb_H696_04860T0	Falb_H696_04861T0 Hsap_ENSP00000260648	Hsap_ENSP00000358106 Ihof_9036	Ihof_9385	Ihof_9807 Mlei_ML01436a	Mlei_ML128425a Mver_00400	Mver_05088	Mver_07467	Mver_09814 Mvib_comp13826_c1_seq1_m25306	Mvib_comp13826_c1_seq2_m25310	Mvib_comp444876_c0_seq1_m47662 Ngru_XP_002671500	Ngru_XP_002678630	Ngru_XP_002681594	Ngru_XP_002683566 Nvec_XP_001622222
OG0000333 Acas_g1687	Acas_g5236	Acas_g8731 Aque_XP_003383866	Aque_XP_003384238	Aque_XP_003384239	Aque_XP_003384240	Aque_XP_003385109 Atha_AT3G26720	Atha_AT5G13980	Atha_AT5G14950	Atha_AT5G66150 Awhi_Unigene10324_m7042	Awhi_Unigene13835_m8995	Awhi_Unigene7195_m4245 Cfra_0152T1 Clim_g4282 Cowc_CAOG_03299	Cowc_CAOG_03430 Nk52_evm10s1837	Nk52_evm10s234	Nk52_evm35s2449	Nk52_evm3s564	Nk52_evm6s1992 Ddis_XP_001134583	Ddis_XP_629747	Ddis_XP_637323	Ddis_XP_642245	Ddis_XP_642278	Ddis_XP_646960 Dmel_FBpp0079343	Dmel_FBpp0079344	Dmel_FBpp0079345	Dmel_FBpp0079346	Dmel_FBpp0079620	Dmel_FBpp0079632	Dmel_FBpp0081509	Dmel_FBpp0082633 Ehux_431298	Ehux_464437 Falb_H696_05200T0 Hsap_ENSP00000261483	Hsap_ENSP00000285599	Hsap_ENSP00000353655	Hsap_ENSP00000395473 Ihof_1168 Mlei_ML02993a	Mlei_ML15456a	Mlei_ML463510a Mvib_comp10416_c1_seq1_m12313	Mvib_comp10416_c4_seq1_m12319	Mvib_comp10426_c1_seq1_m12345	Mvib_comp13277_c1_seq1_m22708	Mvib_comp13443_c0_seq1_m23401	Mvib_comp13443_c1_seq1_m23404	Mvib_comp14949_c0_seq1_m31575	Mvib_comp5287_c0_seq1_m3200	Mvib_comp5287_c0_seq2_m3203	Mvib_comp8762_c1_seq1_m8388 Ngru_XP_002669107	Ngru_XP_002673684	Ngru_XP_002676215	Ngru_XP_002676786	Ngru_XP_002678383 Nvec_XP_001629647	Nvec_XP_001632929 Pgem_Unigene33341_Pirum_gemmatam20101	Pgem_Unigene33342_Pirum_gemmatam20102
OG0000334 Acas_g16975	Acas_g1809	Acas_g7799	Acas_g9516 Atha_AT1G14040	Atha_AT1G26730	Atha_AT1G35350	Atha_AT1G68740	Atha_AT1G69480	Atha_AT2G03240	Atha_AT2G03250	Atha_AT2G03260	Atha_AT2G32295	Atha_AT3G23430	Atha_AT3G29060	Atha_AT4G25350	Atha_AT5G35730 Awhi_Unigene17509_m11345	Awhi_Unigene17510_m11348	Awhi_Unigene31538_m18978	Awhi_Unigene32417_m19874	Awhi_Unigene38631_m24963	Awhi_Unigene41890_m26694 Cang_123413	Cang_165338	Cang_349712 Cfra_1469T1	Cfra_3737T1	Cfra_8461T1 Clim_g5774	Clim_g675 Cowc_CAOG_01872	Cowc_CAOG_01873	Cowc_CAOG_02663 Nk52_evm19s745	Nk52_evm29s293 Ddis_XP_002649192	Ddis_XP_635615	Ddis_XP_636251	Ddis_XP_637991	Ddis_XP_644139 Dmel_FBpp0070578	Dmel_FBpp0074304	Dmel_FBpp0076785	Dmel_FBpp0080847 Ehux_198327	Ehux_204809	Ehux_205172	Ehux_236346	Ehux_238755	Ehux_238756	Ehux_431866	Ehux_450575 Falb_H696_05588T0 Hsap_ENSP00000356562 Ihof_1845	Ihof_220	Ihof_7778 Mlei_ML01577a	Mlei_ML019146a	Mlei_ML08324a	Mlei_ML124236a	Mlei_ML124242a	Mlei_ML16921a
OG0000335 Acas_g10269	Acas_g15013	Acas_g3616	Acas_g5425	Acas_g6961 Aque_XP_003384161	Aque_XP_003387378	Aque_XP_003391527 Atha_AT1G60080	Atha_AT3G07750	Atha_AT3G12990	Atha_AT3G60500 Awhi_Unigene28685_m17342	Awhi_Unigene3455_m2557	Awhi_Unigene36134_m23290	Awhi_Unigene36135_m23293 Cang_120915	Cang_142878	Cang_63921 Cfra_1256T1	Cfra_1969T1	Cfra_7030T1 Clim_g2321	Clim_g269	Clim_g911 Cowc_CAOG_00553	Cowc_CAOG_01811	Cowc_CAOG_04384 Nk52_evm13s2542	Nk52_evm23s2462	Nk52_evm8s299 Ddis_XP_629574	Ddis_XP_641331	Ddis_XP_645822 Dmel_FBpp0074129	Dmel_FBpp0086348 Ehux_105607	Ehux_107586	Ehux_201621	Ehux_78153 Falb_H696_00341T0	Falb_H696_00695T0	Falb_H696_03898T0 Hsap_ENSP00000265564	Hsap_ENSP00000368984	Hsap_ENSP00000374354 Ihof_5990	Ihof_6919	Ihof_9551 Mlei_ML02163a	Mlei_ML091717a Mver_02859	Mver_08689	Mver_09558 Mvib_comp12170_c0_seq1_m18125	Mvib_comp13654_c0_seq1_m24401	Mvib_comp13654_c0_seq2_m24403	Mvib_comp13654_c0_seq3_m24406	Mvib_comp3484_c0_seq1_m1510 Ngru_XP_002677840	Ngru_XP_002681801	Ngru_XP_002683063 Nvec_XP_001626253	Nvec_XP_001626255	Nvec_XP_001627004	Nvec_XP_001632865 Pgem_Unigene23363_Pirum_gemmatam14910	Pgem_Unigene40456_Pirum_gemmatam25089	Pgem_Unigene6303_Pirum_gemmatam3885 Pyez_12753_g3044 Sarc4_g11608T	Sarc4_g11925T
OG0000336 Acas_g4495 Awhi_Unigene19099_m12816	Awhi_Unigene34947_m22019	Awhi_Unigene6971_m3970	Awhi_Unigene6972_m3972	Awhi_Unigene7379_m4435	Awhi_Unigene7380_m4436 Cang_117980	Cang_119419	Cang_127854	Cang_51131	Cang_85614 Cfra_2428T1 Clim_g4781 Cowc_CAOG_05994 Nk52_evm16s2273	Nk52_evm1s218 Ddis_XP_638373	Ddis_XP_639952	Ddis_XP_641833 Dmel_FBpp0112329 Ehux_120385 Falb_H696_02684T0 Hsap_ENSP00000256031	Hsap_ENSP00000327214	Hsap_ENSP00000339182	Hsap_ENSP00000341942 Ihof_5119 Mlei_ML00616a	Mlei_ML03044a	Mlei_ML19984a Mver_02027	Mver_08914 Mvib_comp13056_c0_seq1_m21734 Ngru_XP_002669533	Ngru_XP_002670383	Ngru_XP_002676123	Ngru_XP_002679030	Ngru_XP_002679695 Nvec_XP_001633524	Nvec_XP_001638496 Pgem_Unigene1230_Pirum_gemmatam962	Pgem_Unigene12399_Pirum_gemmatam7979	Pgem_Unigene12400_Pirum_gemmatam7980	Pgem_Unigene13493_Pirum_gemmatam8744	Pgem_Unigene13549_Pirum_gemmatam8784	Pgem_Unigene14937_Pirum_gemmatam9511	Pgem_Unigene15109_Pirum_gemmatam9613	Pgem_Unigene15963_Pirum_gemmatam10151	Pgem_Unigene16586_Pirum_gemmatam10431	Pgem_Unigene16751_Pirum_gemmatam10584	Pgem_Unigene21685_Pirum_gemmatam14049	Pgem_Unigene22661_Pirum_gemmatam14548	Pgem_Unigene28322_Pirum_gemmatam16898	Pgem_Unigene36418_Pirum_gemmatam22580	Pgem_Unigene38989_Pirum_gemmatam24130	Pgem_Unigene39061_Pirum_gemmatam24174	Pgem_Unigene4367_Pirum_gemmatam3065	Pgem_Unigene8103_Pirum_gemmatam5076	Pgem_Unigene8580_Pirum_gemmatam5486	Pgem_Unigene8939_Pirum_gemmatam5802 Pyez_29695_g7287	Pyez_42601_g9617	Pyez_44796_g9947 Sarc4_g11660T	Sarc4_g18143T	Sarc4_g18316T	Sarc4_g21917T	Sarc4_g26812T	Sarc4_g26813T Sdes_comp18940_c0_seq1m9428
OG0000337 Acas_g13115	Acas_g5726	Acas_g5782	Acas_g8571	Acas_g8584 Aque_XP_003384373	Aque_XP_003387458	Aque_XP_003390789 Atha_AT1G25380	Atha_AT2G47490	Atha_AT5G66380 Awhi_Unigene29151_m17723	Awhi_Unigene32942_m20346	Awhi_Unigene32943_m20347	Awhi_Unigene33502_m20912 Cang_105425	Cang_133294	Cang_49908 Cfra_4770T1	Cfra_5370T1	Cfra_6417T1 Clim_g1112	Clim_g1363	Clim_g618 Cowc_CAOG_00451	Cowc_CAOG_07725	Cowc_CAOG_07801 Nk52_evm14s236	Nk52_evm51s32	Nk52_evm83s230 Ddis_XP_635668	Ddis_XP_638991	Ddis_XP_642050	Ddis_XP_645399 Dmel_FBpp0077576	Dmel_FBpp0291674 Ehux_227939	Ehux_232530	Ehux_54695 Falb_H696_00462T0	Falb_H696_01585T0	Falb_H696_04172T0 Hsap_ENSP00000297578	Hsap_ENSP00000306328	Hsap_ENSP00000320688 Ihof_10014	Ihof_4818	Ihof_5477	Ihof_7026 Mlei_ML07311a	Mlei_ML31702a Mver_06401	Mver_06795	Mver_07907 Mvib_comp10959_c0_seq1_m13959	Mvib_comp10959_c0_seq2_m13961	Mvib_comp12584_c0_seq1_m19683	Mvib_comp6687_c0_seq1_m4483	Mvib_comp873_c0_seq1_m561 Ngru_XP_002670442	Ngru_XP_002682488	Ngru_XP_002682745 Nvec_XP_001620558	Nvec_XP_001630605	Nvec_XP_001636005	Nvec_XP_001641750	Nvec_XP_001641850 Pgem_Unigene21654_Pirum_gemmatam14029	Pgem_Unigene38843_Pirum_gemmatam24010	Pgem_Unigene5022_Pirum_gemmatam3369 Pyez_14197_g3398
OG0000338 Aque_XP_003386816	Aque_XP_003388226	Aque_XP_003388454	Aque_XP_003388455	Aque_XP_003388456 Dmel_FBpp0071690	Dmel_FBpp0071691	Dmel_FBpp0071692	Dmel_FBpp0074939	Dmel_FBpp0078956	Dmel_FBpp0079423	Dmel_FBpp0079952	Dmel_FBpp0079966 Hsap_ENSP00000217159	Hsap_ENSP00000256958	Hsap_ENSP00000260126	Hsap_ENSP00000261196	Hsap_ENSP00000289575	Hsap_ENSP00000305974	Hsap_ENSP00000309741	Hsap_ENSP00000311291	Hsap_ENSP00000320634	Hsap_ENSP00000369135	Hsap_ENSP00000370964	Hsap_ENSP00000394168	Hsap_ENSP00000440394	Hsap_ENSP00000441269 Mlei_ML010510a	Mlei_ML03332a	Mlei_ML033415a	Mlei_ML046338a	Mlei_ML05714a	Mlei_ML05716a	Mlei_ML18358a	Mlei_ML216333a	Mlei_ML24222a Mvib_comp6338_c0_seq1_m4127	Mvib_comp9631_c1_seq1_m10305 Nvec_XP_001619912	Nvec_XP_001619913	Nvec_XP_001620287	Nvec_XP_001620748	Nvec_XP_001623707	Nvec_XP_001623814	Nvec_XP_001624073	Nvec_XP_001625959	Nvec_XP_001626700	Nvec_XP_001626718	Nvec_XP_001628699	Nvec_XP_001629297	Nvec_XP_001629298	Nvec_XP_001629697	Nvec_XP_001629698	Nvec_XP_001630750	Nvec_XP_001633237
OG0000339 Aque_XP_003385642	Aque_XP_003385791 Dmel_FBpp0080183	Dmel_FBpp0082933	Dmel_FBpp0084273	Dmel_FBpp0289593 Hsap_ENSP00000266674	Hsap_ENSP00000294954	Hsap_ENSP00000298171	Hsap_ENSP00000298386	Hsap_ENSP00000303248	Hsap_ENSP00000356247	Hsap_ENSP00000368516	Hsap_ENSP00000384708 Mlei_ML00735a	Mlei_ML07086a	Mlei_ML08388a	Mlei_ML09537a	Mlei_ML128424a	Mlei_ML16032a	Mlei_ML16588a	Mlei_ML16705a	Mlei_ML198511a	Mlei_ML20562a	Mlei_ML46391a Nvec_XP_001618068	Nvec_XP_001623461	Nvec_XP_001624540	Nvec_XP_001624838	Nvec_XP_001625478	Nvec_XP_001626505	Nvec_XP_001627129	Nvec_XP_001630835	Nvec_XP_001631537	Nvec_XP_001631856	Nvec_XP_001635111	Nvec_XP_001635251	Nvec_XP_001635321	Nvec_XP_001637653	Nvec_XP_001637660	Nvec_XP_001638153	Nvec_XP_001638678	Nvec_XP_001640050	Nvec_XP_001640419	Nvec_XP_001641580 Sdes_comp11799_c0_seq1m2860 Skow_XP_002733803	Skow_XP_002739238	Skow_XP_002742004 Tadh_XP_002107746	Tadh_XP_002107856	Tadh_XP_002108376	Tadh_XP_002108406	Tadh_XP_002108649	Tadh_XP_002108651	Tadh_XP_002109131	Tadh_XP_002109603
OG0000340 Acas_g1050	Acas_g1051	Acas_g15774	Acas_g1698	Acas_g17568	Acas_g201	Acas_g4465	Acas_g5115	Acas_g5123	Acas_g6274	Acas_g8258	Acas_g9672 Aque_XP_003389847	Aque_XP_003390086 Awhi_Unigene11400_m7488	Awhi_Unigene17030_m10782	Awhi_Unigene33328_m20740	Awhi_Unigene33509_m20915 Cang_103604	Cang_124414	Cang_126391	Cang_136987	Cang_143993	Cang_151155	Cang_151807	Cang_270845	Cang_37717	Cang_62385 Cfra_0832T1	Cfra_2752T1	Cfra_4590T1 Clim_g3768	Clim_g4008	Clim_g976 Cowc_CAOG_02403	Cowc_CAOG_09034 Nk52_evm15s375	Nk52_evm2s1945	Nk52_evm33s248	Nk52_evm4s214	Nk52_evm60s236	Nk52_evm6s578	Nk52_evm84s352 Dmel_FBpp0086082	Dmel_FBpp0086083	Dmel_FBpp0086085	Dmel_FBpp0111976	Dmel_FBpp0288788 Ehux_111381	Ehux_111972	Ehux_119690	Ehux_202775	Ehux_214750	Ehux_228520 Hsap_ENSP00000257770 Mlei_ML059011a	Mlei_ML07782a	Mlei_ML11134a Mver_02088	Mver_05384 Mvib_comp14954_c0_seq1_m31615	Mvib_comp8352_c0_seq1_m7509 Ngru_XP_002673763	Ngru_XP_002678083
OG0000341 Acas_g2596	Acas_g7499	Acas_g7634 Aque_XP_003386592	Aque_XP_003386597	Aque_XP_003390702	Aque_XP_003390765 Atha_AT3G20930	Atha_AT3G54230	Atha_AT5G26610 Awhi_Unigene2501_m1785	Awhi_Unigene28180_m16890	Awhi_Unigene31532_m18972	Awhi_Unigene35503_m22602	Awhi_Unigene35857_m22958	Awhi_Unigene40215_m25720 Cang_27713 Cfra_2214T1	Cfra_7343T1 Cowc_CAOG_02229 Nk52_evm2s136 Ddis_XP_637483 Dmel_FBpp0077631	Dmel_FBpp0077635	Dmel_FBpp0086500 Ehux_207057	Ehux_454638 Falb_H696_00751T0	Falb_H696_05290T0	Falb_H696_05290T1	Falb_H696_06304T0 Hsap_ENSP00000261530	Hsap_ENSP00000266022	Hsap_ENSP00000303252	Hsap_ENSP00000316109	Hsap_ENSP00000329638	Hsap_ENSP00000335486	Hsap_ENSP00000343054	Hsap_ENSP00000355902	Hsap_ENSP00000366829 Ihof_6418	Ihof_7078	Ihof_8133	Ihof_956	Ihof_9599 Mlei_ML015621a	Mlei_ML04869a Mver_04732	Mver_11607 Mvib_comp13112_c0_seq1_m21990	Mvib_comp13112_c0_seq1_m21995	Mvib_comp8879_c0_seq1_m8618	Mvib_comp8879_c0_seq2_m8622 Ngru_XP_002674316 Nvec_XP_001626444	Nvec_XP_001637639	Nvec_XP_001640169	Nvec_XP_001640932 Pgem_Unigene790_Pirum_gemmatam645	Pgem_Unigene8268_Pirum_gemmatam5205	Pgem_Unigene8269_Pirum_gemmatam5206	Pgem_Unigene8270_Pirum_gemmatam5207 Sarc4_g16807T	Sarc4_g17612T	Sarc4_g6315T Sdes_comp20671_c0_seq10m16062	Sdes_comp20671_c0_seq11m16064	Sdes_comp20671_c0_seq12m16066	Sdes_comp20671_c0_seq13m16068	Sdes_comp20671_c0_seq14m16070	Sdes_comp20671_c0_seq14m16071
OG0000342 Acas_g4211 Aque_XP_003389852 Atha_AT2G39740	Atha_AT2G45620	Atha_AT3G45750	Atha_AT3G45760 Awhi_Unigene10605_m7150	Awhi_Unigene20218_m13857	Awhi_Unigene35680_m22775	Awhi_Unigene3626_m2698 Cang_115197 Cfra_1880T1	Cfra_3420T1	Cfra_7066T1 Clim_g1120	Clim_g3324 Cowc_CAOG_01291	Cowc_CAOG_05596 Nk52_evm32s352	Nk52_evm39s147 Ddis_XP_640670	Ddis_XP_642359	Ddis_XP_645343	Ddis_XP_646845 Dmel_FBpp0070227	Dmel_FBpp0073417	Dmel_FBpp0076387	Dmel_FBpp0081154	Dmel_FBpp0083598 Ehux_104162	Ehux_120757	Ehux_121646	Ehux_245544	Ehux_64375 Hsap_ENSP00000257177	Hsap_ENSP00000296783	Hsap_ENSP00000308000	Hsap_ENSP00000350820	Hsap_ENSP00000365130	Hsap_ENSP00000448623 Ihof_1073	Ihof_2468	Ihof_3175	Ihof_3960	Ihof_4253	Ihof_4364	Ihof_7986 Mlei_ML005010a	Mlei_ML08481a	Mlei_ML08889a	Mlei_ML43118a Mver_00511	Mver_04481	Mver_04504	Mver_04535	Mver_05069	Mver_10703	Mver_10859	Mver_11047	Mver_11956 Mvib_comp11827_c0_seq1_m16943	Mvib_comp13253_c0_seq1_m22601 Ngru_XP_002669192	Ngru_XP_002678238 Nvec_XP_001617866	Nvec_XP_001634038	Nvec_XP_001636035	Nvec_XP_001641543 Pgem_Unigene22666_Pirum_gemmatam14551
OG0000343 Ehux_198060	Ehux_227714	Ehux_449615 Hsap_ENSP00000192314	Hsap_ENSP00000308591	Hsap_ENSP00000343234	Hsap_ENSP00000353142 Mlei_ML022010a	Mlei_ML02444a	Mlei_ML064012a	Mlei_ML069132a	Mlei_ML086423a	Mlei_ML14552a	Mlei_ML238318a	Mlei_ML402910a	Mlei_ML402911a	Mlei_ML402913a Nvec_XP_001619478	Nvec_XP_001619813	Nvec_XP_001624149	Nvec_XP_001625510	Nvec_XP_001628263	Nvec_XP_001628374	Nvec_XP_001629594	Nvec_XP_001635892	Nvec_XP_001640266	Nvec_XP_001640267 Skow_XP_002730885	Skow_XP_002731004	Skow_XP_002731005	Skow_XP_002731090	Skow_XP_002731185	Skow_XP_002731207	Skow_XP_002731332	Skow_XP_002731738	Skow_XP_002731766	Skow_XP_002732236	Skow_XP_002732237	Skow_XP_002732523	Skow_XP_002732524	Skow_XP_002732576	Skow_XP_002732616	Skow_XP_002732617	Skow_XP_002732627	Skow_XP_002732991	Skow_XP_002733023	Skow_XP_002733032	Skow_XP_002733691	Skow_XP_002734020	Skow_XP_002734396	Skow_XP_002734752	Skow_XP_002734753	Skow_XP_002734754	Skow_XP_002734763
OG0000344 Acas_g1066	Acas_g11844	Acas_g12225	Acas_g12227	Acas_g12902	Acas_g1521 Aque_XP_003382813	Aque_XP_003384872	Aque_XP_003384873	Aque_XP_003388864	Aque_XP_003389433 Atha_AT3G26380	Atha_AT3G56310	Atha_AT5G08370	Atha_AT5G08380 Awhi_Unigene29399_m17935	Awhi_Unigene33185_m20592 Clim_g5935 Cowc_CAOG_02698	Cowc_CAOG_03210	Cowc_CAOG_03211	Cowc_CAOG_04805	Cowc_CAOG_06017	Cowc_CAOG_06723 Nk52_evm27s236 Ddis_XP_635276	Ddis_XP_645802 Dmel_FBpp0079549	Dmel_FBpp0086315 Ehux_105406	Ehux_109526	Ehux_205415	Ehux_239510	Ehux_433441	Ehux_466221	Ehux_47562	Ehux_53809	Ehux_66472	Ehux_68712	Ehux_77352	Ehux_77442	Ehux_96582 Hsap_ENSP00000218516	Hsap_ENSP00000379680 Ihof_907	Ihof_9391 Mlei_ML01164a	Mlei_ML040525a	Mlei_ML04822a	Mlei_ML04823a Mver_02640 Mvib_comp12348_c1_seq1_m18736	Mvib_comp12348_c1_seq2_m18738	Mvib_comp12448_c0_seq1_m19149	Mvib_comp12743_c0_seq1_m20304	Mvib_comp12743_c0_seq2_m20307	Mvib_comp13734_c0_seq1_m24847	Mvib_comp14351_c0_seq1_m28029	Mvib_comp14351_c0_seq2_m28032	Mvib_comp14794_c0_seq1_m30571	Mvib_comp15002_c1_seq1_m31918	Mvib_comp15002_c1_seq2_m31919	Mvib_comp15140_c0_seq1_m32835	Mvib_comp15182_c4_seq1_m33141
OG0000345 Acas_g11862	Acas_g1193	Acas_g18188	Acas_g4322 Atha_AT1G54300	Atha_AT3G05770 Awhi_Unigene17129_m10892	Awhi_Unigene17673_m11557	Awhi_Unigene17822_m11740	Awhi_Unigene18991_m12719	Awhi_Unigene20631_m14232	Awhi_Unigene260_m221	Awhi_Unigene28368_m17059	Awhi_Unigene34779_m21834	Awhi_Unigene37798_m24515	Awhi_Unigene39523_m25305	Awhi_Unigene39524_m25306 Cfra_0232T1	Cfra_0752T1	Cfra_1358T1	Cfra_2000T1	Cfra_2983T1	Cfra_3036T1	Cfra_3235T1	Cfra_3822T1	Cfra_4059T1	Cfra_4995T1	Cfra_6841T1	Cfra_7268T1	Cfra_7811T1	Cfra_7926T1 Cowc_CAOG_06227 Nk52_evm10s1763	Nk52_evm11s245 Ddis_XP_644062 Falb_H696_01964T0 Ihof_10240	Ihof_10343	Ihof_1083	Ihof_1484	Ihof_1773	Ihof_2227	Ihof_2612	Ihof_2953	Ihof_3109	Ihof_3186	Ihof_4484	Ihof_4485	Ihof_4636	Ihof_500	Ihof_6509	Ihof_6575	Ihof_6739	Ihof_7564	Ihof_7647	Ihof_8059	Ihof_9765	Ihof_9984 Mver_03838 Pgem_Unigene11535_Pirum_gemmatam7472
OG0000346 Acas_g12266	Acas_g15378	Acas_g4881	Acas_g6533	Acas_g6697 Aque_XP_003383242	Aque_XP_003388418	Aque_XP_003391500 Atha_AT4G11920	Atha_AT4G22910	Atha_AT4G33260	Atha_AT4G33270	Atha_AT5G13840	Atha_AT5G26900	Atha_AT5G27080	Atha_AT5G27570	Atha_AT5G27945 Awhi_Unigene17151_m10918	Awhi_Unigene35157_m22247 Cang_100381	Cang_305113 Cfra_3021T1	Cfra_7897T1 Clim_g1131	Clim_g3364 Cowc_CAOG_00145	Cowc_CAOG_06861 Nk52_evm17s1178	Nk52_evm23s240 Ddis_XP_637334	Ddis_XP_638150 Dmel_FBpp0070654	Dmel_FBpp0072055	Dmel_FBpp0078949	Dmel_FBpp0080391 Ehux_244415	Ehux_417498	Ehux_434346	Ehux_455430	Ehux_455431	Ehux_468325	Ehux_53075	Ehux_78421 Falb_H696_03424T0 Hsap_ENSP00000308450	Hsap_ENSP00000370781	Hsap_ENSP00000378529 Ihof_1079	Ihof_677 Mlei_ML05252a	Mlei_ML13163a	Mlei_ML167043a Mver_05197	Mver_11618 Mvib_comp12525_c0_seq1_m19425	Mvib_comp12525_c1_seq1_m19428	Mvib_comp12679_c0_seq1_m20038	Mvib_comp12679_c0_seq2_m20043	Mvib_comp12679_c0_seq3_m20046	Mvib_comp12679_c0_seq4_m20050 Ngru_XP_002669852 Nvec_XP_001623504	Nvec_XP_001624408	Nvec_XP_001625106	Nvec_XP_001625800	Nvec_XP_001637197 Pgem_Unigene17938_Pirum_gemmatam11616	Pgem_Unigene22314_Pirum_gemmatam14380	Pgem_Unigene22507_Pirum_gemmatam14476	Pgem_Unigene32451_Pirum_gemmatam19613
OG0000347 Acas_g7291 Aque_XP_003384384	Aque_XP_003386801 Awhi_Unigene20678_m14273 Cowc_CAOG_01785 Ddis_XP_642079 Dmel_FBpp0070400	Dmel_FBpp0070401	Dmel_FBpp0070865	Dmel_FBpp0073145	Dmel_FBpp0075707	Dmel_FBpp0076823	Dmel_FBpp0078440	Dmel_FBpp0078953	Dmel_FBpp0079074	Dmel_FBpp0079090	Dmel_FBpp0080321	Dmel_FBpp0080749	Dmel_FBpp0080778	Dmel_FBpp0083690	Dmel_FBpp0083837	Dmel_FBpp0085226	Dmel_FBpp0087586	Dmel_FBpp0087614	Dmel_FBpp0087617	Dmel_FBpp0099381	Dmel_FBpp0099382	Dmel_FBpp0112996 Ehux_219488	Ehux_226414	Ehux_249066	Ehux_452762 Hsap_ENSP00000260116	Hsap_ENSP00000262605	Hsap_ENSP00000268125	Hsap_ENSP00000275162	Hsap_ENSP00000325506 Ihof_603 Nvec_XP_001625862 Pgem_Unigene12876_Pirum_gemmatam8297	Pgem_Unigene29278_Pirum_gemmatam17663 Pyez_21028_g5154	Pyez_2613_g504	Pyez_34553_g8305	Pyez_41378_g9427	Pyez_41648_g9472 Skow_XP_002730376	Skow_XP_002731347	Skow_XP_002734109	Skow_XP_002734110	Skow_XP_002735743	Skow_XP_002735744	Skow_XP_002735745	Skow_XP_002735756	Skow_XP_002736460	Skow_XP_002738437	Skow_XP_002738969	Skow_XP_002739555	Skow_XP_002739556	Skow_XP_002739961	Skow_XP_002739962	Skow_XP_002739963
OG0000348 Acas_g11043	Acas_g1321	Acas_g347	Acas_g3837	Acas_g3994	Acas_g5155	Acas_g5683	Acas_g7010	Acas_g7012	Acas_g7811	Acas_g9329 Aque_XP_003382668	Aque_XP_003386360 Awhi_Unigene18281_m12277	Awhi_Unigene18401_m12407	Awhi_Unigene36196_m23353	Awhi_Unigene7635_m4708	Awhi_Unigene8565_m5759 Cang_119300	Cang_318502	Cang_34238	Cang_51169	Cang_53433 Cfra_4826T1	Cfra_7068T1 Clim_g2707 Cowc_CAOG_01320	Cowc_CAOG_04691	Cowc_CAOG_06041	Cowc_CAOG_08035 Nk52_evm4s217	Nk52_evm8s2462 Ddis_XP_637101	Ddis_XP_643105	Ddis_XP_646197	Ddis_XP_646232	Ddis_XP_647081 Dmel_FBpp0074060	Dmel_FBpp0082763	Dmel_FBpp0113099 Falb_H696_01112T0	Falb_H696_01457T0 Hsap_ENSP00000260404	Hsap_ENSP00000278568	Hsap_ENSP00000314067	Hsap_ENSP00000322957	Hsap_ENSP00000351049	Hsap_ENSP00000353864 Ihof_2069	Ihof_2223	Ihof_7686	Ihof_7951 Mlei_ML013514a	Mlei_ML077615a	Mlei_ML23311a Mver_01863	Mver_05486	Mver_07485	Mver_09050 Mvib_comp11213_c0_seq1_m14802	Mvib_comp127243_c0_seq1_m45260	Mvib_comp14263_c0_seq1_m27539	Mvib_comp14263_c0_seq2_m27543	Mvib_comp15451_c0_seq1_m35270	Mvib_comp15451_c0_seq2_m35274
OG0000349 Acas_g667	Acas_g8186 Aque_XP_003384304	Aque_XP_003384305	Aque_XP_003386502	Aque_XP_003387907	Aque_XP_003389511 Atha_AT1G20960	Atha_AT2G42270	Atha_AT3G27730	Atha_AT5G61140 Awhi_Unigene11480_m7518	Awhi_Unigene11960_m7729	Awhi_Unigene17112_m10870	Awhi_Unigene22639_m15192	Awhi_Unigene29769_m18266	Awhi_Unigene41582_m26516	Awhi_Unigene6137_m3513 Cang_122500	Cang_129714	Cang_50960	Cang_55352 Cfra_0312T1	Cfra_0807T1	Cfra_3882T1 Clim_g1421	Clim_g3356 Cowc_CAOG_01779	Cowc_CAOG_02543	Cowc_CAOG_08772	Cowc_CAOG_08773 Nk52_evm18s1671	Nk52_evm43s164	Nk52_evm6s210 Ddis_XP_635715	Ddis_XP_646493 Dmel_FBpp0075282	Dmel_FBpp0082601 Ehux_197472	Ehux_422149	Ehux_45877	Ehux_65842 Falb_H696_00297T0	Falb_H696_04341T0 Hsap_ENSP00000317123	Hsap_ENSP00000358159	Hsap_ENSP00000359454 Ihof_2379	Ihof_4808	Ihof_6844	Ihof_9051 Mlei_ML009128a	Mlei_ML11543a	Mlei_ML12562a Mver_04587	Mver_10894 Mvib_comp13142_c0_seq1_m22123	Mvib_comp15645_c0_seq1_m37185	Mvib_comp15645_c3_seq1_m37195	Mvib_comp9808_c4_seq1_m10733 Ngru_XP_002670349	Ngru_XP_002681600	Ngru_XP_002683132 Nvec_XP_001626984	Nvec_XP_001638777	Nvec_XP_001641209 Pgem_Unigene11664_Pirum_gemmatam7551	Pgem_Unigene13681_Pirum_gemmatam8891	Pgem_Unigene8218_Pirum_gemmatam5170 Pyez_11075_g2644	Pyez_46105_g10151
OG0000350 Acas_g3438	Acas_g5798 Aque_XP_003384015	Aque_XP_003385982	Aque_XP_003386337 Atha_AT1G73450	Atha_AT1G73460	Atha_AT2G40120	Atha_AT3G17750	Atha_AT4G03175	Atha_AT5G35980 Awhi_Unigene10612_m7154	Awhi_Unigene13480_m8757	Awhi_Unigene27223_m16605 Cang_124246	Cang_63179 Cfra_1985T1	Cfra_6201T1 Clim_g382	Clim_g6021 Cowc_CAOG_00863	Cowc_CAOG_03006	Cowc_CAOG_04106 Nk52_evm17s2657	Nk52_evm36s229	Nk52_evm57s221 Ddis_XP_628965	Ddis_XP_638920	Ddis_XP_642598 Dmel_FBpp0088344	Dmel_FBpp0099816	Dmel_FBpp0289737 Ehux_228919	Ehux_454192	Ehux_466294	Ehux_64552 Falb_H696_04402T0 Hsap_ENSP00000312789	Hsap_ENSP00000342105	Hsap_ENSP00000356076	Hsap_ENSP00000381932	Hsap_ENSP00000437534 Ihof_3709	Ihof_4645	Ihof_9719 Mlei_ML003240a	Mlei_ML04281a	Mlei_ML451312a Mver_01992	Mver_04890	Mver_08443	Mver_11078 Mvib_comp13247_c1_seq1_m22582	Mvib_comp13247_c1_seq2_m22584	Mvib_comp15596_c0_seq1_m36761	Mvib_comp15596_c0_seq2_m36764	Mvib_comp15596_c0_seq3_m36767	Mvib_comp15596_c0_seq4_m36769 Ngru_XP_002668905	Ngru_XP_002669105	Ngru_XP_002670554	Ngru_XP_002680367	Ngru_XP_002680567 Nvec_XP_001628357	Nvec_XP_001637250	Nvec_XP_001638207 Pgem_Unigene17513_Pirum_gemmatam11238	Pgem_Unigene17514_Pirum_gemmatam11240	Pgem_Unigene26564_Pirum_gemmatam16221	Pgem_Unigene5412_Pirum_gemmatam3521
OG0000351 Acas_g10699	Acas_g15414	Acas_g4204	Acas_g8892	Acas_g9841 Awhi_Unigene16816_m10571	Awhi_Unigene8610_m5806 Cang_30540	Cang_39472	Cang_55537	Cang_55539	Cang_95772 Cfra_1630T1 Clim_g2859	Clim_g2914	Clim_g3764	Clim_g6278	Clim_g6279	Clim_g6306	Clim_g6456	Clim_g6457	Clim_g7014	Clim_g7051	Clim_g7052 Cowc_CAOG_05250 Ddis_XP_635804 Dmel_FBpp0084847	Dmel_FBpp0087129 Ehux_102403	Ehux_193859	Ehux_201842	Ehux_209376	Ehux_310752	Ehux_432070 Falb_H696_01878T0 Hsap_ENSP00000199936	Hsap_ENSP00000257895	Hsap_ENSP00000293502	Hsap_ENSP00000316786	Hsap_ENSP00000318631	Hsap_ENSP00000350914	Hsap_ENSP00000381206	Hsap_ENSP00000389241 Mver_07377	Mver_09466 Mvib_comp13969_c0_seq1_m26002	Mvib_comp13969_c0_seq2_m26005	Mvib_comp15086_c0_seq1_m32494	Mvib_comp15086_c0_seq2_m32495	Mvib_comp9761_c1_seq1_m10610	Mvib_comp9761_c1_seq2_m10612 Ngru_XP_002669517	Ngru_XP_002681796 Nvec_XP_001620005	Nvec_XP_001625660	Nvec_XP_001626221	Nvec_XP_001627197	Nvec_XP_001627198	Nvec_XP_001627212	Nvec_XP_001627213	Nvec_XP_001627214	Nvec_XP_001627215	Nvec_XP_001627216	Nvec_XP_001627771
OG0000352 Acas_g12126	Acas_g6126 Aque_XP_003382841	Aque_XP_003384913	Aque_XP_003384914	Aque_XP_003387316	Aque_XP_003387858	Aque_XP_003388170	Aque_XP_003388171	Aque_XP_003391895 Atha_AT1G68100 Awhi_Unigene32404_m19859	Awhi_Unigene32405_m19862	Awhi_Unigene32406_m19865	Awhi_Unigene41821_m26655	Awhi_Unigene7199_m4250 Cang_66999	Cang_71475	Cang_78949 Cfra_2634T1	Cfra_3544T1 Clim_g266	Clim_g3151 Cowc_CAOG_01271	Cowc_CAOG_04332 Nk52_evm13s376	Nk52_evm14s376	Nk52_evm4s1224	Nk52_evm4s1400	Nk52_evm7s390 Dmel_FBpp0076350	Dmel_FBpp0080687	Dmel_FBpp0088859	Dmel_FBpp0112084 Ehux_468148 Falb_H696_02287T0 Hsap_ENSP00000266980	Hsap_ENSP00000269187	Hsap_ENSP00000289952	Hsap_ENSP00000301305	Hsap_ENSP00000349174	Hsap_ENSP00000352655	Hsap_ENSP00000354689	Hsap_ENSP00000363807	Hsap_ENSP00000366586	Hsap_ENSP00000443003 Ihof_7395 Mlei_ML08545a	Mlei_ML145839a	Mlei_ML23402a Mver_04338	Mver_11531 Mvib_comp13918_c0_seq1_m25732	Mvib_comp13918_c1_seq1_m25733	Mvib_comp14962_c2_seq1_m31682	Mvib_comp14962_c2_seq2_m31686 Ngru_XP_002674492 Nvec_XP_001621411	Nvec_XP_001629423	Nvec_XP_001629424	Nvec_XP_001635022	Nvec_XP_001635023	Nvec_XP_001636333	Nvec_XP_001637270	Nvec_XP_001639962	Nvec_XP_001639963	Nvec_XP_001640882	Nvec_XP_001641064
OG0000353 Acas_g14683	Acas_g15585	Acas_g7117 Aque_XP_003387370	Aque_XP_003388141	Aque_XP_003388142	Aque_XP_003389122 Atha_AT5G42620 Awhi_Unigene16596_m10306 Clim_g26 Nk52_evm37s1569	Nk52_evm5s374 Ddis_XP_629172	Ddis_XP_636687	Ddis_XP_637672	Ddis_XP_640247	Ddis_XP_641257	Ddis_XP_647104 Dmel_FBpp0081659 Ehux_217452	Ehux_219542	Ehux_235119	Ehux_454065	Ehux_455768	Ehux_468024 Falb_H696_03233T0	Falb_H696_05162T0 Hsap_ENSP00000410926 Mlei_ML004921a	Mlei_ML10429a Ngru_XP_002668490	Ngru_XP_002670354	Ngru_XP_002675671	Ngru_XP_002677971	Ngru_XP_002678220 Nvec_XP_001622991	Nvec_XP_001625170	Nvec_XP_001625622	Nvec_XP_001636445 Pgem_Unigene16254_Pirum_gemmatam10226	Pgem_Unigene38258_Pirum_gemmatam23607 Skow_XP_002734051 Sros_PTSG_02281 Tcas_TC014203 Tthe_XP_001008667	Tthe_XP_001010671	Tthe_XP_001012428	Tthe_XP_001012892	Tthe_XP_001014053	Tthe_XP_001016301	Tthe_XP_001016703	Tthe_XP_001016923	Tthe_XP_001016924	Tthe_XP_001016925	Tthe_XP_001016926	Tthe_XP_001016927	Tthe_XP_001016928	Tthe_XP_001016929	Tthe_XP_001017695	Tthe_XP_001017696	Tthe_XP_001017799	Tthe_XP_001018658	Tthe_XP_001018659	Tthe_XP_001018667	Tthe_XP_001018668	Tthe_XP_001018669	Tthe_XP_001018670	Tthe_XP_001018671
OG0000354 Acas_g7663 Aque_XP_003386987	Aque_XP_003387916	Aque_XP_003390467	Aque_XP_003391489 Atha_AT1G13170	Atha_AT2G31020	Atha_AT2G31030	Atha_AT2G31035	Atha_AT3G09300	Atha_AT4G08180	Atha_AT4G12460	Atha_AT4G22540	Atha_AT5G02100	Atha_AT5G59420 Awhi_Unigene33243_m20657 Cang_149889	Cang_77083 Cfra_0779T1	Cfra_7888T1 Clim_g2525	Clim_g4857 Cowc_CAOG_01273	Cowc_CAOG_02957	Cowc_CAOG_03279	Cowc_CAOG_07390	Cowc_CAOG_08402	Cowc_CAOG_09049 Nk52_evm29s78	Nk52_evm39s158	Nk52_evm39s229	Nk52_evm49s2391	Nk52_evm7s634 Ddis_XP_636540	Ddis_XP_638977 Dmel_FBpp0072110	Dmel_FBpp0084176 Falb_H696_04212T0 Hsap_ENSP00000007414	Hsap_ENSP00000263847	Hsap_ENSP00000315410	Hsap_ENSP00000316649	Hsap_ENSP00000320291	Hsap_ENSP00000332576	Hsap_ENSP00000376293 Ihof_4640 Mlei_ML07554a	Mlei_ML07555a	Mlei_ML189329a	Mlei_ML47371a Mver_01516	Mver_02792	Mver_10217 Mvib_comp11693_c0_seq1_m16510	Mvib_comp13388_c0_seq1_m23159	Mvib_comp13388_c1_seq1_m23163	Mvib_comp14606_c0_seq1_m29488	Mvib_comp14606_c0_seq2_m29493	Mvib_comp14606_c0_seq3_m29498	Mvib_comp15701_c0_seq1_m37809	Mvib_comp4214_c0_seq1_m2171 Ngru_XP_002678506 Nvec_XP_001631829	Nvec_XP_001631830	Nvec_XP_001633504	Nvec_XP_001636188 Pgem_Unigene29281_Pirum_gemmatam17665	Pgem_Unigene29282_Pirum_gemmatam17666	Pgem_Unigene34105_Pirum_gemmatam20766 Pyez_3864_g845
OG0000355 Acas_g10648	Acas_g8715 Aque_XP_003383724	Aque_XP_003385569	Aque_XP_003385792	Aque_XP_003387288	Aque_XP_003387541 Atha_AT1G64480	Atha_AT3G18430	Atha_AT4G01420	Atha_AT4G16350	Atha_AT4G17615	Atha_AT4G33000 Awhi_Unigene32107_m19563	Awhi_Unigene8738_m5937 Cang_264387	Cang_411556 Cfra_2807T1	Cfra_8477T1 Clim_g1985	Clim_g4751	Clim_g6673 Cowc_CAOG_00315	Cowc_CAOG_02386	Cowc_CAOG_02621 Nk52_evm13s967	Nk52_evm2s164	Nk52_evm3s338	Nk52_evm5s164 Ddis_XP_001134484	Ddis_XP_637944 Dmel_FBpp0070731	Dmel_FBpp0071445	Dmel_FBpp0078381	Dmel_FBpp0088004 Ehux_233889	Ehux_66731 Falb_H696_00971T0	Falb_H696_01507T0	Falb_H696_05494T0 Hsap_ENSP00000258930	Hsap_ENSP00000269878	Hsap_ENSP00000300113	Hsap_ENSP00000333873	Hsap_ENSP00000335632	Hsap_ENSP00000363939	Hsap_ENSP00000384721	Hsap_ENSP00000384974 Ihof_3794	Ihof_6769 Mlei_ML012033a	Mlei_ML050411a	Mlei_ML154512a	Mlei_ML305533a Mver_10026 Mvib_comp4333_c0_seq1_m2287	Mvib_comp4333_c0_seq2_m2288	Mvib_comp7723_c0_seq1_m6221	Mvib_comp8371_c0_seq1_m7545 Ngru_XP_002671166	Ngru_XP_002680632 Nvec_XP_001628787	Nvec_XP_001632366	Nvec_XP_001639578	Nvec_XP_001640598 Pgem_Unigene15169_Pirum_gemmatam9645	Pgem_Unigene9110_Pirum_gemmatam5975 Pyez_22729_g5617 Sarc4_g24843T	Sarc4_g26746T Sdes_comp19641_c0_seq1m11428	Sdes_comp19807_c0_seq1m11932	Sdes_comp19807_c0_seq2m11933
OG0000356 Atha_AT1G24140	Atha_AT1G59970	Atha_AT1G70170	Atha_AT2G45040	Atha_AT4G16640 Dmel_FBpp0087585	Dmel_FBpp0271771 Ehux_193952	Ehux_242159	Ehux_96302 Hsap_ENSP00000215743	Hsap_ENSP00000219070	Hsap_ENSP00000219271	Hsap_ENSP00000226218	Hsap_ENSP00000236826	Hsap_ENSP00000246186	Hsap_ENSP00000260227	Hsap_ENSP00000260228	Hsap_ENSP00000260229	Hsap_ENSP00000265983	Hsap_ENSP00000279441	Hsap_ENSP00000286614	Hsap_ENSP00000299855	Hsap_ENSP00000300762	Hsap_ENSP00000308208	Hsap_ENSP00000313437	Hsap_ENSP00000322788	Hsap_ENSP00000337816	Hsap_ENSP00000339672	Hsap_ENSP00000340652	Hsap_ENSP00000353767	Hsap_ENSP00000357798	Hsap_ENSP00000361405	Hsap_ENSP00000411590 Mlei_ML030215a	Mlei_ML064958a	Mlei_ML073224a	Mlei_ML077628a	Mlei_ML077631a	Mlei_ML104211a	Mlei_ML110511a	Mlei_ML11342a	Mlei_ML13379a	Mlei_ML13812a	Mlei_ML14041a	Mlei_ML14713a	Mlei_ML14714a	Mlei_ML14783a	Mlei_ML14875a	Mlei_ML154132a	Mlei_ML154528a	Mlei_ML175611a	Mlei_ML19191a	Mlei_ML218938a
OG0000357 Acas_g11586	Acas_g4720	Acas_g854	Acas_g9855 Aque_XP_003383053	Aque_XP_003385602	Aque_XP_003386399	Aque_XP_003391121 Atha_AT1G54350	Atha_AT4G39850 Awhi_Unigene31763_m19214 Cang_130596	Cang_130842	Cang_28981	Cang_40495	Cang_44336	Cang_51796	Cang_79047 Cfra_0113T1	Cfra_8154T1 Clim_g1115	Clim_g3507	Clim_g4620	Clim_g4621	Clim_g6632 Cowc_CAOG_03616	Cowc_CAOG_04253	Cowc_CAOG_08431 Nk52_evm13s1178 Ddis_XP_629252	Ddis_XP_641430	Ddis_XP_641431 Dmel_FBpp0074564	Dmel_FBpp0088213 Ehux_217861	Ehux_417682	Ehux_428064	Ehux_452201	Ehux_66117 Falb_H696_01263T0	Falb_H696_01263T1	Falb_H696_03532T0	Falb_H696_05795T0 Hsap_ENSP00000218104	Hsap_ENSP00000310688	Hsap_ENSP00000349396	Hsap_ENSP00000403357 Ihof_3690 Mlei_ML04332a	Mlei_ML065738a Mver_05343	Mver_09615	Mver_10087	Mver_11917 Mvib_comp10124_c0_seq1_m11473	Mvib_comp15018_c0_seq1_m32058	Mvib_comp15018_c0_seq2_m32060	Mvib_comp218519_c0_seq1_m46322	Mvib_comp89736_c0_seq1_m44719 Ngru_XP_002669000	Ngru_XP_002675444	Ngru_XP_002675719	Ngru_XP_002676203 Nvec_XP_001617416	Nvec_XP_001621128	Nvec_XP_001622075	Nvec_XP_001625805	Nvec_XP_001629201	Nvec_XP_001631601
OG0000358 Acas_g1818	Acas_g18407	Acas_g5497	Acas_g6246 Aque_XP_003390235 Atha_AT4G25850	Atha_AT4G25860	Atha_AT5G57240 Awhi_Unigene29262_m17809	Awhi_Unigene34018_m21047	Awhi_Unigene37573_m24338	Awhi_Unigene37574_m24339	Awhi_Unigene37770_m24495 Cang_26996	Cang_55878	Cang_57181	Cang_95178 Cfra_5346T1 Clim_g311	Clim_g657 Cowc_CAOG_01740	Cowc_CAOG_04991	Cowc_CAOG_05657 Nk52_evm12s239	Nk52_evm2s288	Nk52_evm3s161	Nk52_evm59s914 Ddis_XP_635285	Ddis_XP_638575	Ddis_XP_639330	Ddis_XP_639892	Ddis_XP_641237	Ddis_XP_643140	Ddis_XP_644084	Ddis_XP_645109	Ddis_XP_646418	Ddis_XP_646419 Dmel_FBpp0087535	Dmel_FBpp0291810 Falb_H696_01762T0	Falb_H696_02438T0	Falb_H696_02440T0	Falb_H696_03405T0 Hsap_ENSP00000261183	Hsap_ENSP00000263650	Hsap_ENSP00000296220	Hsap_ENSP00000360775	Hsap_ENSP00000379804 Ihof_1953	Ihof_7032 Mlei_ML002624a	Mlei_ML076023a Mver_01359	Mver_06286	Mver_11180 Mvib_comp11751_c0_seq1_m16685	Mvib_comp14023_c0_seq1_m26232	Mvib_comp170619_c0_seq1_m45869 Ngru_XP_002672165	Ngru_XP_002677111	Ngru_XP_002678864 Nvec_XP_001627977	Nvec_XP_001628211	Nvec_XP_001639863 Pgem_Unigene18946_Pirum_gemmatam12217	Pgem_Unigene35718_Pirum_gemmatam22091	Pgem_Unigene40451_Pirum_gemmatam25086	Pgem_Unigene40452_Pirum_gemmatam25087 Pyez_3957_g874 Sarc4_g20992T	Sarc4_g8560T Sdes_comp10291_c0_seq1m1925
OG0000359 Acas_g4142 Aque_XP_003382717	Aque_XP_003383026	Aque_XP_003383240	Aque_XP_003389407 Atha_AT1G77800	Atha_AT2G31650	Atha_AT3G14740 Awhi_Unigene20820_m14407	Awhi_Unigene29734_m18234	Awhi_Unigene29735_m18236	Awhi_Unigene35520_m22620 Cang_106682	Cang_344349	Cang_53485	Cang_55132 Cfra_1891T1	Cfra_4387T1	Cfra_4612T1	Cfra_8071T1 Clim_g5742	Clim_g5975 Cowc_CAOG_04877	Cowc_CAOG_05969	Cowc_CAOG_08102	Cowc_CAOG_08705 Nk52_evm3s239	Nk52_evm4s212	Nk52_evm7s462 Ddis_XP_638848 Dmel_FBpp0072431	Dmel_FBpp0077145	Dmel_FBpp0088092 Ehux_451953	Ehux_57793	Ehux_68366	Ehux_68955 Falb_H696_06209T0 Hsap_ENSP00000218343	Hsap_ENSP00000226319	Hsap_ENSP00000307411	Hsap_ENSP00000316426	Hsap_ENSP00000350267	Hsap_ENSP00000373340	Hsap_ENSP00000385795	Hsap_ENSP00000385858	Hsap_ENSP00000393804 Ihof_10060	Ihof_10649	Ihof_2909	Ihof_4919	Ihof_6199	Ihof_7456 Mlei_ML004419a	Mlei_ML01281a	Mlei_ML01283a	Mlei_ML070813a	Mlei_ML21525a Mver_00738	Mver_03084	Mver_06279 Mvib_comp15208_c1_seq1_m33294	Mvib_comp9794_c0_seq1_m10690	Mvib_comp9794_c1_seq1_m10698 Nvec_XP_001632632	Nvec_XP_001635841	Nvec_XP_001641778 Pgem_Unigene1118_Pirum_gemmatam854	Pgem_Unigene20545_Pirum_gemmatam13406
OG0000360 Acas_g13142	Acas_g13982	Acas_g9480 Aque_XP_003383793 Atha_AT1G20010	Atha_AT1G75780	Atha_AT2G29550	Atha_AT4G20890	Atha_AT5G12250	Atha_AT5G23860	Atha_AT5G44340	Atha_AT5G62690 Awhi_Unigene14781_m9298	Awhi_Unigene16716_m10459	Awhi_Unigene16717_m10460	Awhi_Unigene17188_m10960 Cang_153124	Cang_185539 Cfra_6232T1 Clim_g3233 Cowc_CAOG_03516	Cowc_CAOG_03517 Nk52_evm3s553	Nk52_evm41s1020 Ddis_XP_646162 Dmel_FBpp0072177	Dmel_FBpp0081524	Dmel_FBpp0084630	Dmel_FBpp0085721 Ehux_451245	Ehux_468958 Falb_H696_01700T0 Hsap_ENSP00000217133	Hsap_ENSP00000259818	Hsap_ENSP00000264071	Hsap_ENSP00000309431	Hsap_ENSP00000318697	Hsap_ENSP00000320295	Hsap_ENSP00000328808	Hsap_ENSP00000339001	Hsap_ENSP00000341289	Hsap_ENSP00000369703 Ihof_5991	Ihof_6243 Mlei_ML020045a	Mlei_ML07214a	Mlei_ML141755a	Mlei_ML218013a	Mlei_ML24281a	Mlei_ML35937a Mver_00874	Mver_01120 Mvib_comp13801_c0_seq1_m25202	Mvib_comp226876_c0_seq1_m46525 Ngru_XP_002671129	Ngru_XP_002672505	Ngru_XP_002677854 Nvec_XP_001628019	Nvec_XP_001628021	Nvec_XP_001628022	Nvec_XP_001628797	Nvec_XP_001632008	Nvec_XP_001634953	Nvec_XP_001636043	Nvec_XP_001641017	Nvec_XP_001641581 Pgem_Unigene17015_Pirum_gemmatam10795	Pgem_Unigene17250_Pirum_gemmatam11010	Pgem_Unigene17802_Pirum_gemmatam11497 Pyez_3533_g760	Pyez_36611_g8688 Sarc4_g29856T Sdes_comp10306_c0_seq1m1942
OG0000361 Aque_XP_003383711	Aque_XP_003384621	Aque_XP_003385368	Aque_XP_003387801	Aque_XP_003387802	Aque_XP_003387803	Aque_XP_003387804	Aque_XP_003388357	Aque_XP_003389401	Aque_XP_003389402	Aque_XP_003389403	Aque_XP_003389404	Aque_XP_003389405	Aque_XP_003389612	Aque_XP_003389783	Aque_XP_003390491	Aque_XP_003390517	Aque_XP_003390588	Aque_XP_003390775	Aque_XP_003390891	Aque_XP_003391581	Aque_XP_003391643	Aque_XP_003391661 Atha_AT1G18140	Atha_AT1G21850	Atha_AT1G21860	Atha_AT1G41830	Atha_AT1G55560	Atha_AT1G55570	Atha_AT1G75790	Atha_AT1G76160	Atha_AT2G23630	Atha_AT2G29130	Atha_AT2G30210	Atha_AT2G38080	Atha_AT2G40370	Atha_AT2G46570	Atha_AT3G09220	Atha_AT3G13390	Atha_AT3G13400	Atha_AT4G12420	Atha_AT4G22010	Atha_AT4G25240	Atha_AT4G28090	Atha_AT4G37160	Atha_AT4G38420	Atha_AT4G39830	Atha_AT5G01040	Atha_AT5G01050	Atha_AT5G01190	Atha_AT5G03260
OG0000362 Acas_g10084	Acas_g10684	Acas_g133	Acas_g13638	Acas_g16059	Acas_g16692	Acas_g2046	Acas_g7079 Aque_XP_003385443	Aque_XP_003389377	Aque_XP_003389607	Aque_XP_003390441	Aque_XP_003391356	Aque_XP_003391416 Atha_AT1G50030	Atha_AT2G35075 Awhi_Unigene12355_m7988	Awhi_Unigene2028_m1416	Awhi_Unigene2029_m1418	Awhi_Unigene2568_m1838	Awhi_Unigene2569_m1839	Awhi_Unigene32087_m19538	Awhi_Unigene34074_m21106	Awhi_Unigene35517_m22616	Awhi_Unigene35518_m22617 Cang_329438 Cfra_2279T1	Cfra_3260T1 Clim_g4856	Clim_g5486 Cowc_CAOG_04064	Cowc_CAOG_05096 Nk52_evm2s236	Nk52_evm3s359 Ddis_XP_640629	Ddis_XP_643468 Dmel_FBpp0070933	Dmel_FBpp0080003 Ehux_121455	Ehux_221755	Ehux_234652	Ehux_249352	Ehux_312679	Ehux_430501	Ehux_99823 Falb_H696_02971T0 Hsap_ENSP00000354558	Hsap_ENSP00000374118 Ihof_10206	Ihof_2916	Ihof_6258	Ihof_7751	Ihof_7867	Ihof_9857 Mlei_ML185510a	Mlei_ML185511a	Mlei_ML458312a Mver_08086	Mver_10726	Mver_11677 Mvib_comp4865_c0_seq1_m2817	Mvib_comp7097_c0_seq1_m5100	Mvib_comp8794_c0_seq1_m8447 Ngru_XP_002674657 Nvec_XP_001637040	Nvec_XP_001640500 Pgem_Unigene10984_Pirum_gemmatam7178	Pgem_Unigene11233_Pirum_gemmatam7328	Pgem_Unigene11286_Pirum_gemmatam7359	Pgem_Unigene11415_Pirum_gemmatam7426
OG0000363 Acas_g16810	Acas_g4447	Acas_g4930	Acas_g5511 Aque_XP_003383904	Aque_XP_003387784	Aque_XP_003387785 Atha_AT1G19310	Atha_AT1G74990	Atha_AT2G23780	Atha_AT2G26350	Atha_AT2G42030	Atha_AT2G44410	Atha_AT3G07200	Atha_AT3G58030	Atha_AT4G03510	Atha_AT4G27470	Atha_AT4G28270	Atha_AT5G48655 Awhi_Unigene5603_m3317	Awhi_Unigene7193_m4243 Cang_120148	Cang_84942 Cfra_1359T1 Clim_g3189	Clim_g3343 Cowc_CAOG_00901	Cowc_CAOG_07203 Nk52_evm2s1019	Nk52_evm7s913	Nk52_evm91s1737 Ddis_XP_637973	Ddis_XP_638242	Ddis_XP_640208	Ddis_XP_644649 Dmel_FBpp0072626	Dmel_FBpp0073969	Dmel_FBpp0073970	Dmel_FBpp0075392	Dmel_FBpp0078287	Dmel_FBpp0082202	Dmel_FBpp0111417 Ehux_110473	Ehux_122757	Ehux_199519	Ehux_221131	Ehux_233236	Ehux_465996	Ehux_64462 Falb_H696_01525T0	Falb_H696_02091T0	Falb_H696_02091T1 Hsap_ENSP00000288774	Hsap_ENSP00000315212	Hsap_ENSP00000320508	Hsap_ENSP00000407656 Ihof_1634	Ihof_8830 Mlei_ML09256a Mver_03940	Mver_06174	Mver_06334	Mver_10001 Mvib_comp11352_c0_seq1_m15264	Mvib_comp14045_c0_seq1_m26351	Mvib_comp3747_c0_seq1_m1769 Ngru_XP_002668028	Ngru_XP_002679102 Nvec_XP_001623097
OG0000364 Acas_g11379	Acas_g14455	Acas_g15209	Acas_g15288	Acas_g6006	Acas_g8953 Awhi_Unigene11636_m7598	Awhi_Unigene12788_m8272	Awhi_Unigene13515_m8782	Awhi_Unigene20857_m14446	Awhi_Unigene27240_m16612	Awhi_Unigene42132_m26831 Cfra_2683T1	Cfra_2684T1	Cfra_3993T1	Cfra_5113T1	Cfra_5585T1	Cfra_5994T1 Cowc_CAOG_00165	Cowc_CAOG_05102 Nk52_evm10s159	Nk52_evm24s262	Nk52_evm26s2391	Nk52_evm30s262	Nk52_evm3s324 Ddis_XP_638506	Ddis_XP_640067	Ddis_XP_643936	Ddis_XP_647598 Dmel_FBpp0072160	Dmel_FBpp0078799	Dmel_FBpp0079983	Dmel_FBpp0290452 Ehux_108928	Ehux_110169	Ehux_225640	Ehux_228252	Ehux_233581	Ehux_246386	Ehux_455506	Ehux_467068	Ehux_95586	Ehux_95977	Ehux_97410 Hsap_ENSP00000309096	Hsap_ENSP00000324570	Hsap_ENSP00000347088 Ihof_1009	Ihof_10502	Ihof_2022	Ihof_4802	Ihof_9217 Mver_07101	Mver_07579	Mver_07583	Mver_08065	Mver_08067	Mver_08155	Mver_09203 Ngru_XP_002670566	Ngru_XP_002672707
OG0000365 Acas_g6852 Atha_AT1G09960	Atha_AT1G22710	Atha_AT1G66570	Atha_AT1G71880	Atha_AT1G71890	Atha_AT2G02860	Atha_AT2G14670	Atha_AT5G06170	Atha_AT5G43610 Awhi_Unigene12029_m7775	Awhi_Unigene12197_m7884	Awhi_Unigene12198_m7885	Awhi_Unigene12199_m7886	Awhi_Unigene14644_m9221	Awhi_Unigene17610_m11476	Awhi_Unigene21182_m14731	Awhi_Unigene22704_m15217	Awhi_Unigene3018_m2194	Awhi_Unigene34126_m21157	Awhi_Unigene41606_m26526	Awhi_Unigene6525_m3662 Cang_48393	Cang_87079 Clim_g3456 Nk52_evm14s554	Nk52_evm1s966	Nk52_evm22s2340	Nk52_evm29s232	Nk52_evm48s2579	Nk52_evm5s2524	Nk52_evm5s261	Nk52_evm5s357	Nk52_evm74s1737	Nk52_evm9s369 Ddis_XP_642887	Ddis_XP_647145 Dmel_FBpp0076231	Dmel_FBpp0290340	Dmel_FBpp0290341	Dmel_FBpp0290342 Ehux_107069	Ehux_246816	Ehux_459279 Hsap_ENSP00000296589	Hsap_ENSP00000356113	Hsap_ENSP00000366699	Hsap_ENSP00000428137 Ihof_1926	Ihof_2650	Ihof_3244 Mlei_ML099810a Mver_07802	Mver_09569 Ngru_XP_002671533	Ngru_XP_002683286 Nvec_XP_001617839 Pgem_Unigene32593_Pirum_gemmatam19730	Pgem_Unigene41259_Pirum_gemmatam25616	Pgem_Unigene8420_Pirum_gemmatam5341 Pyez_16358_g3967	Pyez_21318_g5242	Pyez_24360_g6009	Pyez_29545_g7250	Pyez_29546_g7251	Pyez_30127_g7380
OG0000366 Acas_g10144	Acas_g15690	Acas_g6886 Aque_XP_003391405 Atha_AT3G59410 Awhi_Unigene3299_m2434	Awhi_Unigene34675_m21722	Awhi_Unigene35134_m22213	Awhi_Unigene36862_m23855 Cang_388227	Cang_55427	Cang_70439 Cfra_3413T1	Cfra_7534T1 Clim_g1743	Clim_g5157	Clim_g6480 Cowc_CAOG_03741	Cowc_CAOG_03792 Nk52_evm19s2152	Nk52_evm1s396 Ddis_XP_002649089	Ddis_XP_629489	Ddis_XP_639304	Ddis_XP_642914	Ddis_XP_643344	Ddis_XP_644975	Ddis_XP_646825 Dmel_FBpp0078417	Dmel_FBpp0085148 Ehux_109744	Ehux_203281	Ehux_230973	Ehux_248929	Ehux_444386	Ehux_446820	Ehux_68706 Falb_H696_01264T0	Falb_H696_06381T0 Hsap_ENSP00000199389	Hsap_ENSP00000233057	Hsap_ENSP00000263791	Hsap_ENSP00000307235 Ihof_10141	Ihof_8517	Ihof_9708 Mlei_ML006912a	Mlei_ML012020a	Mlei_ML012021a	Mlei_ML03253a Mver_09241	Mver_09565 Mvib_comp14041_c1_seq1_m26331	Mvib_comp14041_c2_seq1_m26333 Ngru_XP_002673550	Ngru_XP_002675524	Ngru_XP_002676012	Ngru_XP_002676294	Ngru_XP_002677336	Ngru_XP_002680220	Ngru_XP_002680267 Nvec_XP_001618074	Nvec_XP_001638479	Nvec_XP_001640848 Pgem_Unigene11276_Pirum_gemmatam7354	Pgem_Unigene31271_Pirum_gemmatam18664	Pgem_Unigene31272_Pirum_gemmatam18665	Pgem_Unigene35917_Pirum_gemmatam22222	Pgem_Unigene5600_Pirum_gemmatam3587	Pgem_Unigene9639_Pirum_gemmatam6399 Pyez_4757_g1028 Sarc4_g16096T
OG0000367 Acas_g13137	Acas_g9267 Aque_XP_003385041	Aque_XP_003385626 Atha_AT1G18800	Atha_AT1G74560	Atha_AT2G19480	Atha_AT3G13782	Atha_AT4G26110	Atha_AT5G56950 Awhi_Unigene16550_m10259	Awhi_Unigene16846_m10604	Awhi_Unigene7873_m4978 Cang_63587	Cang_66459	Cang_75648 Cfra_0610T1	Cfra_6108T1 Clim_g2850	Clim_g3628 Cowc_CAOG_05711	Cowc_CAOG_07378 Nk52_evm31s2356 Ddis_XP_642251	Ddis_XP_645670	Ddis_XP_645850 Dmel_FBpp0070183	Dmel_FBpp0072128	Dmel_FBpp0082521	Dmel_FBpp0084615 Ehux_215905	Ehux_459881	Ehux_469941	Ehux_73163	Ehux_77303 Falb_H696_05493T0	Falb_H696_05846T0 Hsap_ENSP00000261182	Hsap_ENSP00000314077	Hsap_ENSP00000320488	Hsap_ENSP00000322802	Hsap_ENSP00000327984	Hsap_ENSP00000357597	Hsap_ENSP00000361777	Hsap_ENSP00000362171	Hsap_ENSP00000362616	Hsap_ENSP00000362617	Hsap_ENSP00000364591	Hsap_ENSP00000382533	Hsap_ENSP00000389324	Hsap_ENSP00000399668	Hsap_ENSP00000402825	Hsap_ENSP00000409267	Hsap_ENSP00000410943	Hsap_ENSP00000417919 Ihof_10417	Ihof_8337	Ihof_8997	Ihof_969 Mlei_ML074211a	Mlei_ML15009a Mver_07210	Mver_07389	Mver_09428 Mvib_comp14172_c0_seq1_m27023	Mvib_comp14415_c1_seq1_m28379	Mvib_comp14415_c1_seq2_m28381
OG0000368 Acas_g12725	Acas_g13132	Acas_g13708	Acas_g14366	Acas_g14367	Acas_g14407	Acas_g18621 Aque_XP_003383506	Aque_XP_003389800	Aque_XP_003390632	Aque_XP_003390633	Aque_XP_003390841 Atha_AT1G32270	Atha_AT3G05710	Atha_AT4G02195	Atha_AT4G17730	Atha_AT5G16830	Atha_AT5G26980	Atha_AT5G46860 Awhi_Unigene16412_m10113	Awhi_Unigene32411_m19869	Awhi_Unigene32412_m19870 Cang_50185	Cang_90553 Cfra_0470T1	Cfra_3147T1	Cfra_6767T1 Clim_g1589	Clim_g3696 Cowc_CAOG_01886	Cowc_CAOG_08409 Nk52_evm27s1837	Nk52_evm34s343 Ddis_XP_637015	Ddis_XP_643157	Ddis_XP_643158	Ddis_XP_643159 Dmel_FBpp0075620	Dmel_FBpp0077022	Dmel_FBpp0078007 Ehux_434324 Falb_H696_03045T0	Falb_H696_03045T1	Falb_H696_06299T0 Hsap_ENSP00000303437	Hsap_ENSP00000354445	Hsap_ENSP00000356918	Hsap_ENSP00000363054	Hsap_ENSP00000447757 Ihof_7019	Ihof_7164	Ihof_8849 Mlei_ML042715a	Mlei_ML076010a	Mlei_ML342214a Mver_07099	Mver_07709	Mver_09564	Mver_09592 Mvib_comp13145_c0_seq1_m22143	Mvib_comp13145_c0_seq3_m22148	Mvib_comp169376_c0_seq1_m45856	Mvib_comp4330_c0_seq1_m2284	Mvib_comp7780_c0_seq1_m6405 Ngru_XP_002673921	Ngru_XP_002676084	Ngru_XP_002682148	Ngru_XP_002682983
OG0000369 Aque_XP_003385477	Aque_XP_003385561	Aque_XP_003388663	Aque_XP_003391456	Aque_XP_003391774 Cang_51301 Ddis_XP_629330 Dmel_FBpp0078057	Dmel_FBpp0087334 Hsap_ENSP00000268674	Hsap_ENSP00000296736	Hsap_ENSP00000308354	Hsap_ENSP00000317170	Hsap_ENSP00000333350	Hsap_ENSP00000355162	Hsap_ENSP00000366656	Hsap_ENSP00000369075	Hsap_ENSP00000386186	Hsap_ENSP00000393854	Hsap_ENSP00000421489 Mlei_ML082310a Nvec_XP_001632063	Nvec_XP_001633106	Nvec_XP_001636801 Pyez_10773_g2569	Pyez_11156_g2670	Pyez_1162_g157	Pyez_12166_g2912	Pyez_12901_g3074	Pyez_13969_g3362	Pyez_14099_g3379	Pyez_14587_g3502	Pyez_1603_g247	Pyez_16739_g4078	Pyez_16886_g4102	Pyez_17156_g4173	Pyez_17169_g4176	Pyez_1783_g283	Pyez_17969_g4404	Pyez_18941_g4662	Pyez_18949_g4664	Pyez_1998_g341	Pyez_1999_g342	Pyez_2000_g343	Pyez_20941_g5132	Pyez_20993_g5145	Pyez_20994_g5146	Pyez_22715_g5613	Pyez_22715_g5614	Pyez_23107_g5710	Pyez_23751_g5852	Pyez_26192_g6451	Pyez_26790_g6589	Pyez_26793_g6590	Pyez_26794_g6591	Pyez_27899_g6871	Pyez_28350_g6968
OG0000370 Acas_g1475	Acas_g6245	Acas_g9754 Aque_XP_003383874	Aque_XP_003386035	Aque_XP_003387136 Awhi_Unigene12540_m8102	Awhi_Unigene24319_m15862	Awhi_Unigene36905_m23888	Awhi_Unigene37698_m24439	Awhi_Unigene770_m768 Cang_217541	Cang_25972	Cang_61438	Cang_96618 Cfra_0719T1	Cfra_4824T1	Cfra_6310T1 Clim_g4307	Clim_g5689	Clim_g6932 Cowc_CAOG_03508	Cowc_CAOG_05116 Nk52_evm19s355	Nk52_evm4s213	Nk52_evm56s2657 Ddis_XP_635962	Ddis_XP_637611	Ddis_XP_638409	Ddis_XP_638798 Dmel_FBpp0080015	Dmel_FBpp0083290 Ehux_110864	Ehux_122167	Ehux_450371	Ehux_65804	Ehux_76502	Ehux_77385 Falb_H696_01250T0	Falb_H696_02433T0	Falb_H696_02824T0 Hsap_ENSP00000212015	Hsap_ENSP00000249396	Hsap_ENSP00000372191 Ihof_10671	Ihof_3523	Ihof_8692 Mlei_ML074235a	Mlei_ML07823a	Mlei_ML145823a	Mlei_ML20759a Mver_01100	Mver_06525	Mver_07528	Mver_09234	Mver_09305	Mver_12422 Mvib_comp9342_c0_seq1_m9665	Mvib_comp9342_c0_seq2_m9670 Ngru_XP_002672211	Ngru_XP_002672516	Ngru_XP_002679023 Nvec_XP_001623784	Nvec_XP_001638876	Nvec_XP_001639735	Nvec_XP_001640522 Pgem_Unigene24298_Pirum_gemmatam15491	Pgem_Unigene29455_Pirum_gemmatam17806	Pgem_Unigene36909_Pirum_gemmatam22908
OG0000371 Acas_g11400	Acas_g11402	Acas_g16791	Acas_g17207	Acas_g8071 Aque_XP_003391125 Atha_AT1G18870	Atha_AT1G24807	Atha_AT1G25083	Atha_AT1G25220	Atha_AT1G74710	Atha_AT2G04400	Atha_AT2G28880	Atha_AT2G29690	Atha_AT3G55870	Atha_AT5G05730	Atha_AT5G17990	Atha_AT5G48220	Atha_AT5G57890 Awhi_Unigene16680_m10402	Awhi_Unigene16928_m10678	Awhi_Unigene20527_m14139	Awhi_Unigene28424_m17107	Awhi_Unigene33441_m20859	Awhi_Unigene33442_m20861	Awhi_Unigene35650_m22747 Cang_103918	Cang_109605	Cang_129505	Cang_156080	Cang_42075	Cang_65460 Cfra_0747T1	Cfra_0749T1	Cfra_3688T1 Clim_g1031	Clim_g1768	Clim_g1769	Clim_g252	Clim_g5254 Cowc_CAOG_02913	Cowc_CAOG_02914 Nk52_evm52s221	Nk52_evm54s221	Nk52_evm55s221	Nk52_evm5s738 Ehux_106968	Ehux_204730	Ehux_211619	Ehux_224173	Ehux_313952	Ehux_439707	Ehux_442980	Ehux_448402	Ehux_463702	Ehux_78476 Falb_H696_04290T0 Ihof_2240	Ihof_2362	Ihof_4610	Ihof_9013
OG0000372 Acas_g10842	Acas_g1111	Acas_g11328	Acas_g16861	Acas_g18409 Aque_XP_003382978 Atha_AT1G07110 Awhi_Unigene33349_m20763	Awhi_Unigene37969_m24651	Awhi_Unigene39325_m25178	Awhi_Unigene8545_m5732 Cang_130433	Cang_158832	Cang_38707	Cang_40430	Cang_43612 Cfra_5393T1	Cfra_6958T1	Cfra_7836T1 Clim_g4355	Clim_g6152	Clim_g630	Clim_g862 Cowc_CAOG_03700	Cowc_CAOG_04843 Nk52_evm16s805	Nk52_evm25s2506 Ddis_XP_640057	Ddis_XP_643342 Dmel_FBpp0074485 Ehux_102122	Ehux_105721	Ehux_117848	Ehux_123595	Ehux_196548	Ehux_214042	Ehux_238995	Ehux_414247	Ehux_414868	Ehux_417491	Ehux_41870	Ehux_448668	Ehux_457418	Ehux_463915	Ehux_467381	Ehux_468654 Falb_H696_06229T0	Falb_H696_06229T1	Falb_H696_06229T2 Hsap_ENSP00000232375	Hsap_ENSP00000356047	Hsap_ENSP00000364145	Hsap_ENSP00000446384 Ihof_10401	Ihof_1195	Ihof_1967	Ihof_2593	Ihof_5874	Ihof_9336 Mlei_ML327410a Mver_03679	Mver_08031	Mver_08291	Mver_10436 Mvib_comp15362_c0_seq1_m34454	Mvib_comp15362_c0_seq2_m34455	Mvib_comp15362_c0_seq3_m34456
OG0000373 Acas_g14447	Acas_g17447	Acas_g17758	Acas_g2381	Acas_g4981	Acas_g7687	Acas_g7688 Atha_AT5G02310 Awhi_Unigene15700_m9815	Awhi_Unigene32571_m20005 Cang_153173	Cang_34393 Cfra_1981T1	Cfra_5787T1 Clim_g1463	Clim_g2264 Cowc_CAOG_02299	Cowc_CAOG_02513 Nk52_evm54s164 Ddis_XP_629847	Ddis_XP_629848	Ddis_XP_636710	Ddis_XP_636901	Ddis_XP_637064	Ddis_XP_639098	Ddis_XP_643338 Dmel_FBpp0074189	Dmel_FBpp0290962 Ehux_123133	Ehux_204627	Ehux_217035	Ehux_239450	Ehux_259623	Ehux_457972 Falb_H696_03821T0 Hsap_ENSP00000290650	Hsap_ENSP00000361990	Hsap_ENSP00000393478 Ihof_2080	Ihof_2221	Ihof_612	Ihof_621	Ihof_6371	Ihof_7907	Ihof_8728 Mlei_ML001516a	Mlei_ML001517a	Mlei_ML00172a Mver_07822	Mver_10899 Mvib_comp10695_c0_seq1_m13160	Mvib_comp14352_c1_seq1_m28044	Mvib_comp14352_c3_seq1_m28046	Mvib_comp14352_c4_seq1_m28049	Mvib_comp5422_c0_seq1_m3304	Mvib_comp6142_c0_seq1_m3927	Mvib_comp9303_c2_seq1_m9570 Nvec_XP_001623674	Nvec_XP_001634965	Nvec_XP_001634966 Pgem_Unigene14229_Pirum_gemmatam9165	Pgem_Unigene15279_Pirum_gemmatam9710	Pgem_Unigene21855_Pirum_gemmatam14149	Pgem_Unigene22547_Pirum_gemmatam14499	Pgem_Unigene6614_Pirum_gemmatam4065 Pyez_23652_g5829	Pyez_24527_g6043 Sarc4_g18728T	Sarc4_g8899T Sdes_comp13835_c0_seq1m3309	Sdes_comp17714_c0_seq1m6984
OG0000374 Acas_g11088	Acas_g12518	Acas_g3031	Acas_g3882 Atha_AT1G55910	Atha_AT5G59520 Awhi_Unigene28802_m17451	Awhi_Unigene3047_m2225	Awhi_Unigene36019_m23136	Awhi_Unigene8272_m5431 Cfra_2635T1	Cfra_7571T1	Cfra_8491T1 Clim_g1506	Clim_g3290	Clim_g6579 Cowc_CAOG_00711	Cowc_CAOG_04923 Nk52_evm11s2542	Nk52_evm15s153	Nk52_evm16s153	Nk52_evm1s2258	Nk52_evm1s2465	Nk52_evm2s1224	Nk52_evm45s343	Nk52_evm46s343	Nk52_evm59s352	Nk52_evm5s160 Ddis_XP_637915	Ddis_XP_645880 Dmel_FBpp0082720	Dmel_FBpp0085471	Dmel_FBpp0085472	Dmel_FBpp0288457 Ehux_194008	Ehux_200252	Ehux_200263	Ehux_215869	Ehux_241967 Hsap_ENSP00000298681	Hsap_ENSP00000309710	Hsap_ENSP00000445345 Ihof_1975	Ihof_3419	Ihof_3639	Ihof_4290	Ihof_7379	Ihof_793 Mlei_ML03539a	Mlei_ML082722a	Mlei_ML090225a	Mlei_ML218910a	Mlei_ML218911a	Mlei_ML21899a Mvib_comp10017_c0_seq1_m11224	Mvib_comp9587_c0_seq1_m10203 Ngru_XP_002670471	Ngru_XP_002671785	Ngru_XP_002680018 Nvec_XP_001626411 Pgem_Unigene10705_Pirum_gemmatam7039	Pgem_Unigene11347_Pirum_gemmatam7393	Pgem_Unigene32804_Pirum_gemmatam19935	Pgem_Unigene34112_Pirum_gemmatam20773	Pgem_Unigene3735_Pirum_gemmatam2599	Pgem_Unigene39728_Pirum_gemmatam24610 Pyez_13666_g3290
OG0000375 Acas_g11070 Aque_XP_003385168	Aque_XP_003387227	Aque_XP_003388593	Aque_XP_003388718	Aque_XP_003391648 Atha_AT2G20440	Atha_AT2G43490	Atha_AT3G49350	Atha_AT3G59570	Atha_AT4G27100	Atha_AT4G28550	Atha_AT5G24390	Atha_AT5G41940	Atha_AT5G52580	Atha_AT5G53570	Atha_AT5G54780 Awhi_Unigene12187_m7876	Awhi_Unigene15312_m9590	Awhi_Unigene19826_m13498	Awhi_Unigene19827_m13499	Awhi_Unigene37908_m24606	Awhi_Unigene3826_m2861	Awhi_Unigene3827_m2862	Awhi_Unigene40099_m25650 Cang_55600 Cfra_1603T1	Cfra_4694T1	Cfra_7124T1 Clim_g1225	Clim_g2089	Clim_g835 Cowc_CAOG_01140	Cowc_CAOG_02388 Nk52_evm11s250	Nk52_evm26s2309	Nk52_evm51s2367	Nk52_evm84s158 Ddis_XP_636536 Dmel_FBpp0077784	Dmel_FBpp0079633	Dmel_FBpp0086523 Falb_H696_02023T0	Falb_H696_03320T0 Hsap_ENSP00000221543	Hsap_ENSP00000300504	Hsap_ENSP00000309794	Hsap_ENSP00000365962	Hsap_ENSP00000448182 Ihof_1059	Ihof_3487	Ihof_4596 Mlei_ML02878a	Mlei_ML05484a	Mlei_ML223011a Mver_06315 Mvib_comp12433_c0_seq1_m19101	Mvib_comp13214_c0_seq1_m22458	Mvib_comp13214_c0_seq1_m22459	Mvib_comp13214_c0_seq2_m22462	Mvib_comp13214_c0_seq3_m22464	Mvib_comp13214_c0_seq4_m22469	Mvib_comp13909_c1_seq1_m25682	Mvib_comp15398_c0_seq1_m34772	Mvib_comp15398_c0_seq2_m34777 Ngru_XP_002673421 Nvec_XP_001627200	Nvec_XP_001634654
OG0000376 Acas_g11654	Acas_g15814 Aque_XP_003383379	Aque_XP_003384628	Aque_XP_003385258	Aque_XP_003391904 Atha_AT1G01040	Atha_AT3G03300	Atha_AT3G20420	Atha_AT3G43920	Atha_AT4G15417	Atha_AT5G20320	Atha_AT5G45150 Awhi_Unigene14518_m9155	Awhi_Unigene22191_m15068	Awhi_Unigene23930_m15674	Awhi_Unigene35804_m22895	Awhi_Unigene35805_m22896	Awhi_Unigene37935_m24626	Awhi_Unigene39486_m25276	Awhi_Unigene41173_m26295	Awhi_Unigene5839_m3412 Ddis_XP_001134628 Dmel_FBpp0083717	Dmel_FBpp0086061 Ehux_111240	Ehux_243843 Hsap_ENSP00000251642	Hsap_ENSP00000263642	Hsap_ENSP00000343745	Hsap_ENSP00000369213 Ihof_2765 Mlei_ML17402a Mver_00358	Mver_00447	Mver_00466	Mver_00484 Mvib_comp15209_c0_seq1_m33300	Mvib_comp15209_c0_seq1_m33301	Mvib_comp15209_c0_seq2_m33304	Mvib_comp15209_c0_seq2_m33305	Mvib_comp15209_c0_seq3_m33308	Mvib_comp204503_c0_seq1_m46293	Mvib_comp5734_c0_seq1_m3581	Mvib_comp5734_c1_seq1_m3583	Mvib_comp5757_c1_seq1_m3602	Mvib_comp6267_c1_seq1_m4050	Mvib_comp9522_c1_seq1_m10057	Mvib_comp9522_c2_seq1_m10058 Ngru_XP_002676802	Ngru_XP_002677410	Ngru_XP_002679307	Ngru_XP_002682950 Nvec_XP_001627751	Nvec_XP_001627752	Nvec_XP_001628622	Nvec_XP_001631542	Nvec_XP_001636291	Nvec_XP_001636342	Nvec_XP_001639240	Nvec_XP_001640898 Pgem_Unigene14805_Pirum_gemmatam9426	Pgem_Unigene15543_Pirum_gemmatam9893	Pgem_Unigene198_Pirum_gemmatam183
OG0000377 Aque_XP_003385855 Nk52_evm19s2531 Ehux_205498 Hsap_ENSP00000225823	Hsap_ENSP00000228468	Hsap_ENSP00000264432	Hsap_ENSP00000297512	Hsap_ENSP00000300061	Hsap_ENSP00000302874	Hsap_ENSP00000350786	Hsap_ENSP00000353292	Hsap_ENSP00000368411 Mlei_ML002618a	Mlei_ML005332a	Mlei_ML032110a	Mlei_ML061512a	Mlei_ML064957a	Mlei_ML08637a	Mlei_ML09548a	Mlei_ML128219a	Mlei_ML145836a	Mlei_ML145837a	Mlei_ML16594a	Mlei_ML17566a	Mlei_ML17567a	Mlei_ML17721a	Mlei_ML27696a	Mlei_ML388123a	Mlei_ML418210a Mvib_comp10559_c0_seq1_m12770	Mvib_comp10559_c0_seq2_m12771	Mvib_comp12719_c1_seq1_m20191	Mvib_comp12719_c1_seq2_m20194	Mvib_comp15290_c1_seq1_m33934	Mvib_comp15290_c1_seq2_m33935	Mvib_comp4763_c0_seq1_m2717 Nvec_XP_001617551	Nvec_XP_001619002	Nvec_XP_001619410	Nvec_XP_001619770	Nvec_XP_001621639	Nvec_XP_001621640	Nvec_XP_001621893	Nvec_XP_001622992	Nvec_XP_001622993	Nvec_XP_001622994	Nvec_XP_001623796	Nvec_XP_001623800	Nvec_XP_001625049	Nvec_XP_001625335	Nvec_XP_001625838	Nvec_XP_001626418	Nvec_XP_001626419	Nvec_XP_001626632	Nvec_XP_001628195	Nvec_XP_001628254
OG0000378 Acas_g10377	Acas_g130	Acas_g1879	Acas_g2200	Acas_g3596	Acas_g4479	Acas_g4501	Acas_g5488	Acas_g6605	Acas_g6606	Acas_g6609	Acas_g7087	Acas_g859 Atha_AT5G51880 Awhi_Unigene17044_m10798	Awhi_Unigene17045_m10800	Awhi_Unigene32866_m20278	Awhi_Unigene42472_m27033	Awhi_Unigene8464_m5654 Cang_36412 Cfra_0878T1	Cfra_6204T1	Cfra_7826T1 Nk52_evm30s2011	Nk52_evm80s1444 Ddis_XP_629415	Ddis_XP_637136	Ddis_XP_638092	Ddis_XP_638614	Ddis_XP_640639 Ehux_113561	Ehux_121047	Ehux_202720	Ehux_203266	Ehux_215918	Ehux_227348	Ehux_233946	Ehux_238827	Ehux_238890	Ehux_241213	Ehux_440072	Ehux_443596	Ehux_452320	Ehux_64279 Ihof_8872 Mver_04080	Mver_11219	Mver_12058 Mvib_comp10879_c0_seq1_m13706 Ngru_XP_002668025	Ngru_XP_002668126	Ngru_XP_002668684	Ngru_XP_002669645	Ngru_XP_002669997	Ngru_XP_002670344	Ngru_XP_002671201	Ngru_XP_002671754	Ngru_XP_002672008	Ngru_XP_002672907	Ngru_XP_002673299	Ngru_XP_002673384
OG0000379 Acas_g10089	Acas_g10454	Acas_g10458	Acas_g10716	Acas_g11698	Acas_g12129	Acas_g12130	Acas_g12312	Acas_g12477	Acas_g14062	Acas_g14622	Acas_g14932	Acas_g15056	Acas_g15133	Acas_g16205	Acas_g16229	Acas_g16290	Acas_g18213	Acas_g18437	Acas_g2040	Acas_g2359	Acas_g3992	Acas_g5355	Acas_g6188	Acas_g648	Acas_g6819	Acas_g741	Acas_g7780	Acas_g7858	Acas_g8248	Acas_g8570	Acas_g8725	Acas_g889	Acas_g9038	Acas_g9983 Aque_XP_003382432	Aque_XP_003385806	Aque_XP_003386530	Aque_XP_003386829	Aque_XP_003386942	Aque_XP_003387663	Aque_XP_003387664	Aque_XP_003388022	Aque_XP_003388082	Aque_XP_003389576	Aque_XP_003391216 Cowc_CAOG_01514	Cowc_CAOG_02328	Cowc_CAOG_03490	Cowc_CAOG_04690	Cowc_CAOG_05000	Cowc_CAOG_05004
OG0000380 Acas_g1177	Acas_g2612	Acas_g6685	Acas_g7134 Aque_XP_003387334	Aque_XP_003389205 Atha_AT1G56070	Atha_AT3G12915	Atha_AT3G22980 Awhi_Unigene16940_m10691	Awhi_Unigene19168_m12887	Awhi_Unigene29544_m18074	Awhi_Unigene41665_m26563 Cang_36846	Cang_51830 Cfra_0372T1	Cfra_2691T1 Clim_g331	Clim_g4470	Clim_g5266	Clim_g6997	Clim_g7033 Cowc_CAOG_00385	Cowc_CAOG_07006	Cowc_CAOG_07222 Nk52_evm16s284	Nk52_evm6s967 Ddis_XP_636721	Ddis_XP_637051	Ddis_XP_641601 Dmel_FBpp0075148	Dmel_FBpp0085265 Ehux_312577	Ehux_418918	Ehux_420527	Ehux_421555 Falb_H696_00332T0	Falb_H696_02653T0 Hsap_ENSP00000268206	Hsap_ENSP00000307940 Ihof_2646	Ihof_5812	Ihof_5897 Mlei_ML00017a	Mlei_ML046335a	Mlei_ML054913a	Mlei_ML080915a	Mlei_ML10907a	Mlei_ML16033a	Mlei_ML475513a Mver_01386	Mver_07571 Mvib_comp13513_c0_seq1_m23724	Mvib_comp14660_c0_seq1_m29771	Mvib_comp9621_c0_seq1_m10280	Mvib_comp9621_c0_seq2_m10283 Ngru_XP_002672213	Ngru_XP_002672882	Ngru_XP_002672959	Ngru_XP_002673061	Ngru_XP_002674553	Ngru_XP_002676641 Nvec_XP_001618065	Nvec_XP_001634216	Nvec_XP_001637668 Pgem_Unigene11753_Pirum_gemmatam7601	Pgem_Unigene18530_Pirum_gemmatam12103	Pgem_Unigene40269_Pirum_gemmatam24959 Pyez_12206_g2925	Pyez_27039_g6650	Pyez_39176_g9103 Sarc4_g22297T
OG0000381 Acas_g12900	Acas_g12988	Acas_g1609 Atha_AT1G09400	Atha_AT1G18020	Atha_AT1G76680	Atha_AT1G76690	Atha_AT2G06050 Awhi_Unigene15009_m9436	Awhi_Unigene15098_m9476	Awhi_Unigene18000_m11954	Awhi_Unigene18001_m11955	Awhi_Unigene18002_m11956	Awhi_Unigene20382_m13997	Awhi_Unigene35944_m23047	Awhi_Unigene41092_m26253	Awhi_Unigene8063_m5201 Cang_119145	Cang_355112	Cang_42735 Cfra_7154T1	Cfra_7284T1 Clim_g1749	Clim_g2719	Clim_g5121	Clim_g6458 Cowc_CAOG_03514	Cowc_CAOG_05754	Cowc_CAOG_07185 Nk52_evm1s1668 Ddis_XP_001732981	Ddis_XP_629336	Ddis_XP_637039	Ddis_XP_637191	Ddis_XP_637466	Ddis_XP_641647	Ddis_XP_645464 Ehux_242901	Ehux_253812	Ehux_64696	Ehux_68663 Ihof_10434	Ihof_403	Ihof_4592	Ihof_4594	Ihof_8504 Mver_00368	Mver_00375	Mver_00376	Mver_03539	Mver_03540	Mver_05161 Ngru_XP_002668308	Ngru_XP_002668376	Ngru_XP_002670543	Ngru_XP_002670871	Ngru_XP_002671524	Ngru_XP_002673099	Ngru_XP_002673100	Ngru_XP_002673117	Ngru_XP_002673920	Ngru_XP_002675220
OG0000382 Acas_g3443	Acas_g7944 Aque_XP_003388439	Aque_XP_003390622 Atha_AT1G63460	Atha_AT2G25080	Atha_AT2G31570	Atha_AT2G43350	Atha_AT2G48150	Atha_AT3G63080	Atha_AT4G11600	Atha_AT4G31870 Awhi_Unigene16522_m10231	Awhi_Unigene7594_m4666 Cang_125964 Cfra_2001T1 Clim_g3246 Cowc_CAOG_07214 Nk52_evm1s681	Nk52_evm29s250 Dmel_FBpp0072932	Dmel_FBpp0085780 Ehux_103927	Ehux_214820	Ehux_255551	Ehux_308356	Ehux_355206	Ehux_433534	Ehux_464484	Ehux_61670	Ehux_70639 Falb_H696_03510T0	Falb_H696_03510T1 Hsap_ENSP00000346103	Hsap_ENSP00000354581	Hsap_ENSP00000354677	Hsap_ENSP00000373477	Hsap_ENSP00000374265	Hsap_ENSP00000392398	Hsap_ENSP00000407375	Hsap_ENSP00000423822 Ihof_401	Ihof_633 Mlei_ML116411a	Mlei_ML257623a Mver_08562 Mvib_comp13482_c0_seq1_m23563 Ngru_XP_002671105	Ngru_XP_002673824	Ngru_XP_002675182	Ngru_XP_002680136	Ngru_XP_002680507	Ngru_XP_002682143 Nvec_XP_001617695	Nvec_XP_001617792	Nvec_XP_001625812	Nvec_XP_001641219	Nvec_XP_001641220	Nvec_XP_001641323 Pyez_14829_g3560	Pyez_22345_g5519	Pyez_2691_g536 Sarc4_g12130T Sdes_comp9176_c0_seq1m646 Skow_NP_001171856	Skow_NP_001171857	Skow_XP_002732787	Skow_XP_002736384	Skow_XP_002738737 Spom_NP_596146_1 Spun_SPPG_02520	Spun_SPPG_02525 Sros_PTSG_06503	Sros_PTSG_12233	Sros_PTSG_12756 Tadh_XP_002112102
OG0000383 Acas_g4693	Acas_g4773	Acas_g6959 Aque_XP_003384941	Aque_XP_003388530	Aque_XP_003388677	Aque_XP_003390113	Aque_XP_003390546	Aque_XP_003391452	Aque_XP_003392120 Atha_AT1G04870	Atha_AT2G19670	Atha_AT3G20020	Atha_AT4G29510 Awhi_Unigene12385_m8000	Awhi_Unigene28365_m17056	Awhi_Unigene36889_m23876	Awhi_Unigene39904_m25540	Awhi_Unigene39905_m25542	Awhi_Unigene8131_m5276 Cang_115772 Cfra_5935T1	Cfra_6897T1	Cfra_7574T1 Clim_g3341	Clim_g6298 Cowc_CAOG_01693	Cowc_CAOG_05835	Cowc_CAOG_06899 Nk52_evm6s1129	Nk52_evm9s246 Ddis_XP_635288	Ddis_XP_636224	Ddis_XP_643270 Dmel_FBpp0077165	Dmel_FBpp0079751	Dmel_FBpp0081780	Dmel_FBpp0082341	Dmel_FBpp0082588 Ehux_108579	Ehux_120211	Ehux_43966	Ehux_53207	Ehux_66842 Falb_H696_00821T0	Falb_H696_03752T0 Hsap_ENSP00000331879	Hsap_ENSP00000347906	Hsap_ENSP00000359095	Hsap_ENSP00000372067	Hsap_ENSP00000406162 Ihof_2292	Ihof_8044	Ihof_8125 Mlei_ML210018a	Mlei_ML39332a Mver_05200	Mver_06390 Mvib_comp15241_c1_seq1_m33637	Mvib_comp15241_c1_seq2_m33639	Mvib_comp6984_c0_seq1_m4881	Mvib_comp8174_c1_seq1_m7161 Ngru_XP_002673669	Ngru_XP_002679219 Nvec_XP_001620477	Nvec_XP_001631209	Nvec_XP_001639674	Nvec_XP_001642024 Pgem_Unigene16210_Pirum_gemmatam10218	Pgem_Unigene19817_Pirum_gemmatam12875
OG0000384 Acas_g6616 Atha_AT1G02720	Atha_AT1G06780	Atha_AT1G13250	Atha_AT1G18580	Atha_AT1G19300	Atha_AT1G24170	Atha_AT1G70090	Atha_AT2G20810	Atha_AT2G30575	Atha_AT2G38650	Atha_AT2G46480	Atha_AT3G01040	Atha_AT3G02350	Atha_AT3G06260	Atha_AT3G25140	Atha_AT3G28340	Atha_AT3G50760	Atha_AT3G58790	Atha_AT3G61130	Atha_AT3G62660	Atha_AT4G02130	Atha_AT4G38270	Atha_AT5G15470	Atha_AT5G47780	Atha_AT5G54690 Awhi_Unigene11977_m7741	Awhi_Unigene15628_m9763	Awhi_Unigene2059_m1443	Awhi_Unigene24716_m16055	Awhi_Unigene26431_m16355	Awhi_Unigene29335_m17870	Awhi_Unigene29336_m17871	Awhi_Unigene33331_m20744	Awhi_Unigene37396_m24216 Cfra_3760T1	Cfra_5689T1	Cfra_6472T1	Cfra_7187T1	Cfra_7879T1 Clim_g1152	Clim_g180	Clim_g4132 Cowc_CAOG_00084	Cowc_CAOG_05928	Cowc_CAOG_06429	Cowc_CAOG_06430	Cowc_CAOG_06431	Cowc_CAOG_06432 Nk52_evm3s361	Nk52_evm42s1569	Nk52_evm53s554 Ehux_110612	Ehux_111968	Ehux_203769	Ehux_226629	Ehux_244742
OG0000385 Acas_g9363 Aque_XP_003383848	Aque_XP_003385120 Awhi_Unigene19272_m12982	Awhi_Unigene32480_m19930	Awhi_Unigene35093_m22174	Awhi_Unigene35094_m22175	Awhi_Unigene35771_m22862 Cang_141682	Cang_36054 Cfra_7017T1	Cfra_7177T1	Cfra_7331T1	Cfra_7645T1	Cfra_8511T1 Clim_g1484	Clim_g1831	Clim_g3742	Clim_g857 Cowc_CAOG_02921	Cowc_CAOG_03769	Cowc_CAOG_03833	Cowc_CAOG_04592 Nk52_evm114s221	Nk52_evm13s1763	Nk52_evm19s233	Nk52_evm1s300	Nk52_evm5s274	Nk52_evm6s2630 Dmel_FBpp0070134	Dmel_FBpp0075877 Ehux_222774	Ehux_454183 Falb_H696_01394T0	Falb_H696_06276T0 Hsap_ENSP00000261534	Hsap_ENSP00000361302 Ihof_10202	Ihof_1575	Ihof_1969	Ihof_4843	Ihof_5767	Ihof_6064	Ihof_8496	Ihof_9406 Mlei_ML00965a	Mlei_ML13029a Mver_02686	Mver_04586	Mver_04737	Mver_04772	Mver_05037	Mver_06788	Mver_10538	Mver_11290	Mver_12150 Mvib_comp228190_c0_seq1_m46552	Mvib_comp3083_c0_seq1_m1078	Mvib_comp3083_c1_seq1_m1079	Mvib_comp5803_c0_seq1_m3637	Mvib_comp5803_c1_seq1_m3640	Mvib_comp9456_c0_seq1_m9917 Nvec_XP_001622853	Nvec_XP_001635134 Pgem_Unigene19552_Pirum_gemmatam12654	Pgem_Unigene28906_Pirum_gemmatam17346	Pgem_Unigene3847_Pirum_gemmatam2678 Pyez_12787_g3057
OG0000386 Aque_XP_003383942	Aque_XP_003386573	Aque_XP_003387303	Aque_XP_003387322	Aque_XP_003387393	Aque_XP_003387798	Aque_XP_003389547	Aque_XP_003391400 Awhi_Unigene15365_m9619	Awhi_Unigene22897_m15265 Cfra_1208T1	Cfra_1661T1	Cfra_1813T1	Cfra_3981T1	Cfra_5824T1	Cfra_6948T1 Cowc_CAOG_05512	Cowc_CAOG_05526	Cowc_CAOG_07284 Nk52_evm15s1360	Nk52_evm3s246 Dmel_FBpp0070640	Dmel_FBpp0071187	Dmel_FBpp0075771	Dmel_FBpp0076248	Dmel_FBpp0076249	Dmel_FBpp0076274	Dmel_FBpp0078710	Dmel_FBpp0078726 Hsap_ENSP00000177694	Hsap_ENSP00000219905	Hsap_ENSP00000240328	Hsap_ENSP00000257566	Hsap_ENSP00000279386	Hsap_ENSP00000296946	Hsap_ENSP00000309913	Hsap_ENSP00000331791	Hsap_ENSP00000335191	Hsap_ENSP00000356795	Hsap_ENSP00000358437	Hsap_ENSP00000358677	Hsap_ENSP00000362390	Hsap_ENSP00000374205	Hsap_ENSP00000377435	Hsap_ENSP00000386170	Hsap_ENSP00000388620 Ihof_8795	Ihof_9740 Mlei_ML00581a	Mlei_ML03395a	Mlei_ML046417a	Mlei_ML04812a	Mlei_ML04813a	Mlei_ML13206a	Mlei_ML174736a	Mlei_ML45844a Mver_02729 Mvib_comp15896_c0_seq1_m40614	Mvib_comp15896_c0_seq2_m40615 Nvec_XP_001626767	Nvec_XP_001626870
OG0000387 Acas_g10731	Acas_g14731	Acas_g14930	Acas_g219	Acas_g4592	Acas_g4686	Acas_g4926	Acas_g5126	Acas_g5734	Acas_g8782 Aque_XP_003384641	Aque_XP_003385534	Aque_XP_003385752 Atha_AT1G35470	Atha_AT4G06536	Atha_AT4G09250	Atha_AT4G09310	Atha_AT4G09340 Awhi_Unigene7622_m4693 Cang_102352	Cang_123886	Cang_244842	Cang_33824	Cang_387493	Cang_410582	Cang_43730	Cang_46303	Cang_47250	Cang_63318	Cang_70263	Cang_84313 Cfra_5066T1	Cfra_7043T1 Clim_g2012 Cowc_CAOG_06799 Nk52_evm37s207	Nk52_evm43s967	Nk52_evm4s273	Nk52_evm7s106 Ddis_XP_629459	Ddis_XP_639040 Dmel_FBpp0099887 Ehux_108829	Ehux_109979	Ehux_111249	Ehux_196040	Ehux_196068	Ehux_196861	Ehux_223432	Ehux_365889	Ehux_437547	Ehux_443786 Falb_H696_02222T0 Hsap_ENSP00000011619	Hsap_ENSP00000316589	Hsap_ENSP00000449452 Ihof_5396 Mlei_ML067119a	Mlei_ML42338a Mver_00651	Mver_02671	Mver_05969	Mver_12147 Mvib_comp10966_c0_seq1_m13987	Mvib_comp10966_c0_seq2_m13989	Mvib_comp14268_c0_seq1_m27565	Mvib_comp14804_c0_seq1_m30606 Ngru_XP_002671777
OG0000388 Acas_g1543 Aque_XP_003384583	Aque_XP_003384584	Aque_XP_003385851 Atha_AT1G64040	Atha_AT2G29400	Atha_AT2G39840	Atha_AT3G05580	Atha_AT3G46820	Atha_AT4G11240	Atha_AT5G27840	Atha_AT5G43380	Atha_AT5G59160 Awhi_Unigene17742_m11636	Awhi_Unigene17743_m11637	Awhi_Unigene17744_m11638	Awhi_Unigene17745_m11639	Awhi_Unigene17746_m11640	Awhi_Unigene35799_m22890	Awhi_Unigene9070_m6349	Awhi_Unigene9071_m6350	Awhi_Unigene9072_m6351 Cang_116885	Cang_121596	Cang_121643	Cang_53547 Cfra_2323T1	Cfra_5704T1	Cfra_8402T1 Clim_g1451	Clim_g576 Cowc_CAOG_02563	Cowc_CAOG_06715 Nk52_evm13s1705	Nk52_evm1s1778 Ddis_XP_643639 Dmel_FBpp0071381	Dmel_FBpp0071650	Dmel_FBpp0071719	Dmel_FBpp0073834	Dmel_FBpp0077344	Dmel_FBpp0082067	Dmel_FBpp0084026	Dmel_FBpp0085996	Dmel_FBpp0112617 Ehux_351312	Ehux_358030	Ehux_369081	Ehux_418014 Falb_H696_02358T0	Falb_H696_04109T0 Hsap_ENSP00000296122	Hsap_ENSP00000341779	Hsap_ENSP00000405603 Ihof_10511	Ihof_5522	Ihof_6659 Mlei_ML00486a	Mlei_ML01121a Mver_02595	Mver_02596 Mvib_comp13492_c1_seq1_m23612	Mvib_comp270162_c0_seq1_m46850 Ngru_XP_002670392 Nvec_XP_001632147	Nvec_XP_001632148	Nvec_XP_001636711 Pgem_Unigene16423_Pirum_gemmatam10287	Pgem_Unigene32341_Pirum_gemmatam19530	Pgem_Unigene35651_Pirum_gemmatam22042
OG0000389 Acas_g11023	Acas_g11690	Acas_g15213	Acas_g15316	Acas_g1600	Acas_g3974	Acas_g5090	Acas_g7756	Acas_g9609	Acas_g9624	Acas_g9891 Aque_XP_003387189 Cang_359273	Cang_372826	Cang_385102	Cang_44045	Cang_44785	Cang_45383	Cang_52998	Cang_52999	Cang_53000	Cang_53962	Cang_57403	Cang_59393	Cang_75734 Nk52_evm1s304	Nk52_evm20s225	Nk52_evm24s207	Nk52_evm6s1607	Nk52_evm6s559	Nk52_evm7s559	Nk52_evm8s77 Ddis_XP_001732957	Ddis_XP_002649152	Ddis_XP_640123	Ddis_XP_640124	Ddis_XP_641364	Ddis_XP_642873 Ehux_101455	Ehux_103806	Ehux_252014	Ehux_359964 Hsap_ENSP00000261893	Hsap_ENSP00000402297 Mlei_ML00444a	Mlei_ML00504a	Mlei_ML025030a	Mlei_ML073031a Mver_02355	Mver_02356	Mver_02357	Mver_02358	Mver_02359	Mver_02360	Mver_02361	Mver_02362	Mver_02363	Mver_02364
OG0000390 Acas_g13062	Acas_g14497	Acas_g14631	Acas_g16493	Acas_g16907	Acas_g1811	Acas_g3937	Acas_g4590	Acas_g6501 Aque_XP_003388642	Aque_XP_003388643	Aque_XP_003388652	Aque_XP_003388653	Aque_XP_003391770 Atha_AT1G26320	Atha_AT1G65560	Atha_AT3G03080	Atha_AT3G59845	Atha_AT5G16960	Atha_AT5G16970	Atha_AT5G16980	Atha_AT5G16990	Atha_AT5G17000	Atha_AT5G37940	Atha_AT5G37960	Atha_AT5G37980	Atha_AT5G38000 Awhi_Unigene32736_m20165	Awhi_Unigene7765_m4856	Awhi_Unigene7766_m4857 Cang_64484 Cfra_6502T1 Clim_g2166 Cowc_CAOG_02052	Cowc_CAOG_03489	Cowc_CAOG_05650 Ddis_XP_637847	Ddis_XP_637849	Ddis_XP_643099 Ehux_115039	Ehux_198627	Ehux_217293	Ehux_253956	Ehux_462771	Ehux_462772	Ehux_464985 Hsap_ENSP00000267568	Hsap_ENSP00000311572	Hsap_ENSP00000323678 Ihof_402	Ihof_4767	Ihof_4770 Mver_01631	Mver_01854	Mver_02007	Mver_02023	Mver_02024	Mver_02025	Mver_03302	Mver_03303	Mver_03304	Mver_04538
OG0000391 Acas_g11334	Acas_g12147	Acas_g12528	Acas_g13172	Acas_g13200	Acas_g13275	Acas_g13278	Acas_g15420	Acas_g16325	Acas_g2234	Acas_g3756	Acas_g5349	Acas_g7278	Acas_g7804	Acas_g8585	Acas_g8957 Aque_XP_003382733	Aque_XP_003384314	Aque_XP_003385918 Atha_AT3G19420	Atha_AT3G50110	Atha_AT5G39400 Awhi_Unigene13750_m8944	Awhi_Unigene302_m283	Awhi_Unigene34741_m21796 Cang_369622	Cang_49629 Cfra_7959T1 Clim_g4245	Clim_g80 Cowc_CAOG_01428	Cowc_CAOG_04172 Nk52_evm22s221 Ddis_XP_629443	Ddis_XP_635981	Ddis_XP_636914	Ddis_XP_637576	Ddis_XP_638022	Ddis_XP_643506 Dmel_FBpp0088839 Ehux_195717	Ehux_214579	Ehux_437207 Falb_H696_00701T0 Hsap_ENSP00000171887	Hsap_ENSP00000312143	Hsap_ENSP00000319756	Hsap_ENSP00000355208	Hsap_ENSP00000360108	Hsap_ENSP00000361021	Hsap_ENSP00000372437 Ihof_6343	Ihof_9326 Mlei_ML02005a	Mlei_ML064944a	Mlei_ML11633a	Mlei_ML193212a Mver_07252 Mvib_comp12175_c0_seq1_m18139	Mvib_comp13913_c0_seq2_m25707	Mvib_comp15385_c0_seq1_m34650	Mvib_comp15385_c0_seq2_m34655	Mvib_comp7228_c0_seq1_m5349 Ngru_XP_002676378	Ngru_XP_002677109	Ngru_XP_002677301	Ngru_XP_002678142	Ngru_XP_002680680
OG0000392 Acas_g2724	Acas_g2812 Ehux_109089	Ehux_118793	Ehux_123223	Ehux_124507	Ehux_198407	Ehux_206527	Ehux_214682	Ehux_215916	Ehux_218580	Ehux_225203	Ehux_232686	Ehux_232743	Ehux_233206	Ehux_239291	Ehux_241515	Ehux_253292	Ehux_446728	Ehux_459025 Hsap_ENSP00000366387	Hsap_ENSP00000366477	Hsap_ENSP00000382178	Hsap_ENSP00000411339	Hsap_ENSP00000422042 Mlei_ML048618a	Mlei_ML048620a	Mlei_ML048621a	Mlei_ML048623a	Mlei_ML08661a	Mlei_ML08664a	Mlei_ML15451a	Mlei_ML46181a Nvec_XP_001618444	Nvec_XP_001619015	Nvec_XP_001619498	Nvec_XP_001620312	Nvec_XP_001620686	Nvec_XP_001622219	Nvec_XP_001623265	Nvec_XP_001623438	Nvec_XP_001624929	Nvec_XP_001625476	Nvec_XP_001625790	Nvec_XP_001625792	Nvec_XP_001628186	Nvec_XP_001629788	Nvec_XP_001631498	Nvec_XP_001631499	Nvec_XP_001631500	Nvec_XP_001631687	Nvec_XP_001631689	Nvec_XP_001631858	Nvec_XP_001633105
OG0000393 Aque_XP_003383438	Aque_XP_003385539	Aque_XP_003392076 Atha_AT1G35720	Atha_AT1G68090	Atha_AT2G38750	Atha_AT2G38760	Atha_AT5G10220	Atha_AT5G10230	Atha_AT5G12380	Atha_AT5G65020 Awhi_Unigene19599_m13297	Awhi_Unigene29931_m18419	Awhi_Unigene29932_m18420	Awhi_Unigene39730_m25436	Awhi_Unigene7965_m5085	Awhi_Unigene7966_m5087 Cfra_5626T1 Clim_g5207	Clim_g6331 Cowc_CAOG_02064	Cowc_CAOG_05171	Cowc_CAOG_09008 Nk52_evm11s16	Nk52_evm12s16	Nk52_evm13s303 Ddis_XP_001134471	Ddis_XP_638685	Ddis_XP_646006 Dmel_FBpp0074078	Dmel_FBpp0088505	Dmel_FBpp0089015	Dmel_FBpp0089017	Dmel_FBpp0089019	Dmel_FBpp0291143 Falb_H696_02685T0 Hsap_ENSP00000257497	Hsap_ENSP00000262219	Hsap_ENSP00000264908	Hsap_ENSP00000265447	Hsap_ENSP00000296511	Hsap_ENSP00000341674	Hsap_ENSP00000346032	Hsap_ENSP00000346550	Hsap_ENSP00000352101	Hsap_ENSP00000352248	Hsap_ENSP00000357943	Hsap_ENSP00000362010	Hsap_ENSP00000363395	Hsap_ENSP00000377833 Ihof_6227	Ihof_6442 Mlei_ML00134a	Mlei_ML01536a	Mlei_ML03242a	Mlei_ML05421a	Mlei_ML08207a	Mlei_ML139112a	Mlei_ML148937a Mver_03812 Mvib_comp49350_c0_seq1_m44041	Mvib_comp7683_c0_seq1_m6141	Mvib_comp7800_c0_seq1_m6438	Mvib_comp98627_c0_seq1_m44893 Nvec_XP_001620544
OG0000394 Aque_XP_003386791	Aque_XP_003391727 Awhi_Unigene17383_m11187	Awhi_Unigene26880_m16498	Awhi_Unigene32938_m20342	Awhi_Unigene5610_m3319	Awhi_Unigene8166_m5317 Cang_122783	Cang_130841	Cang_50870	Cang_51606	Cang_57205	Cang_58495 Cfra_0156T1	Cfra_1977T1 Clim_g5124	Clim_g687 Cowc_CAOG_02416	Cowc_CAOG_03460 Nk52_evm11s280	Nk52_evm27s1737	Nk52_evm55s252 Ddis_XP_642777	Ddis_XP_647420 Dmel_FBpp0071750	Dmel_FBpp0088502	Dmel_FBpp0291443 Hsap_ENSP00000218548	Hsap_ENSP00000262623	Hsap_ENSP00000295598	Hsap_ENSP00000354490	Hsap_ENSP00000357060	Hsap_ENSP00000411503 Mlei_ML088211a	Mlei_ML11344a	Mlei_ML141758a Mver_00105	Mver_00999	Mver_01727	Mver_02875 Mvib_comp14281_c0_seq1_m27674	Mvib_comp15387_c0_seq1_m34665 Ngru_XP_002675507	Ngru_XP_002681456	Ngru_XP_002681794	Ngru_XP_002683336 Nvec_XP_001628518	Nvec_XP_001632743 Pgem_Unigene16624_Pirum_gemmatam10467	Pgem_Unigene17066_Pirum_gemmatam10849	Pgem_Unigene17948_Pirum_gemmatam11623	Pgem_Unigene24195_Pirum_gemmatam15432	Pgem_Unigene8449_Pirum_gemmatam5375	Pgem_Unigene8450_Pirum_gemmatam5377 Pyez_13837_g3329	Pyez_15873_g3804	Pyez_16943_g4119 Sarc4_g28716T Sdes_comp19471_c0_seq1m10916	Sdes_comp20141_c0_seq1m13248	Sdes_comp20784_c0_seq1m16887 Skow_XP_002737354 Spun_SPPG_00058	Spun_SPPG_01615	Spun_SPPG_07476	Spun_SPPG_08470 Sros_PTSG_01035	Sros_PTSG_05228	Sros_PTSG_07829	Sros_PTSG_08530	Sros_PTSG_08937
OG0000395 Ehux_111108	Ehux_113433	Ehux_198786	Ehux_200283	Ehux_220573	Ehux_222818	Ehux_230021	Ehux_231980	Ehux_243743	Ehux_247657	Ehux_313149	Ehux_449018	Ehux_468985	Ehux_469965 Hsap_ENSP00000215912	Hsap_ENSP00000222390	Hsap_ENSP00000304422	Hsap_ENSP00000308541	Hsap_ENSP00000321334	Hsap_ENSP00000331242	Hsap_ENSP00000414287	Hsap_ENSP00000438833 Mlei_ML00645a	Mlei_ML00836a	Mlei_ML011717a	Mlei_ML011718a	Mlei_ML011730a	Mlei_ML011731a	Mlei_ML011732a	Mlei_ML017921a	Mlei_ML03051a	Mlei_ML033235a	Mlei_ML04819a	Mlei_ML070825a	Mlei_ML107912a	Mlei_ML10905a	Mlei_ML128419a	Mlei_ML13771a	Mlei_ML156510a	Mlei_ML15659a	Mlei_ML170111a	Mlei_ML19983a	Mlei_ML20266a	Mlei_ML20267a	Mlei_ML22132a	Mlei_ML28255a	Mlei_ML311627a Nvec_XP_001618952	Nvec_XP_001621026	Nvec_XP_001622293	Nvec_XP_001631826 Sarc4_g2650T Skow_XP_002731555	Skow_XP_002732360	Skow_XP_002733859
OG0000396 Acas_g1031	Acas_g7216	Acas_g7879 Aque_XP_003387067 Atha_AT2G07110	Atha_AT3G46210	Atha_AT3G61620	Atha_AT4G27490 Awhi_Unigene19148_m12866	Awhi_Unigene19149_m12867	Awhi_Unigene33015_m20421	Awhi_Unigene33395_m20814	Awhi_Unigene33396_m20815	Awhi_Unigene42715_m27161 Cang_331063	Cang_39294	Cang_60699 Cfra_0361T1	Cfra_5698T1	Cfra_5748T1 Clim_g1240	Clim_g267	Clim_g3785 Cowc_CAOG_02523	Cowc_CAOG_08636	Cowc_CAOG_09141 Nk52_evm17s1360	Nk52_evm1s1934 Ddis_XP_635144	Ddis_XP_638714	Ddis_XP_645702 Dmel_FBpp0074687	Dmel_FBpp0080062	Dmel_FBpp0081725 Ehux_240695	Ehux_357768	Ehux_440617	Ehux_463559 Falb_H696_01812T0	Falb_H696_02205T0 Hsap_ENSP00000221233	Hsap_ENSP00000398597	Hsap_ENSP00000436539	Hsap_ENSP00000439356 Ihof_4420	Ihof_5127	Ihof_5700 Mlei_ML004435a	Mlei_ML015625a	Mlei_ML02961a Mver_05750	Mver_06432	Mver_07767 Mvib_comp10217_c0_seq1_m11729	Mvib_comp10217_c0_seq2_m11733	Mvib_comp13310_c0_seq1_m22870	Mvib_comp13310_c0_seq2_m22871	Mvib_comp8318_c0_seq1_m7433 Ngru_XP_002677284	Ngru_XP_002679009	Ngru_XP_002682945 Nvec_XP_001634554	Nvec_XP_001635076	Nvec_XP_001638317 Pgem_Unigene24421_Pirum_gemmatam15552	Pgem_Unigene29495_Pirum_gemmatam17835	Pgem_Unigene6875_Pirum_gemmatam4202 Pyez_37431_g8809 Sarc4_g13525T	Sarc4_g19983T	Sarc4_g22381T Sdes_comp18613_c0_seq4m8779	Sdes_comp18613_c0_seq6m8782
OG0000397 Acas_g14741	Acas_g1528	Acas_g4136	Acas_g4173	Acas_g7555	Acas_g8378 Aque_XP_003384775	Aque_XP_003387983	Aque_XP_003389714 Atha_AT3G44110	Atha_AT3G62600	Atha_AT5G22060 Awhi_Unigene1018_m974	Awhi_Unigene17142_m10908	Awhi_Unigene18330_m12328	Awhi_Unigene19243_m12958	Awhi_Unigene5427_m3268	Awhi_Unigene6099_m3501 Cang_34668	Cang_73464	Cang_84479 Cfra_0427T1	Cfra_2927T1	Cfra_2960T1	Cfra_8362T1 Clim_g1130	Clim_g191 Cowc_CAOG_01290	Cowc_CAOG_05317	Cowc_CAOG_07485 Nk52_evm57s78	Nk52_evm61s270 Ddis_XP_635307	Ddis_XP_640251	Ddis_XP_641304 Dmel_FBpp0077720	Dmel_FBpp0080071	Dmel_FBpp0082219 Falb_H696_03475T0	Falb_H696_05509T0 Hsap_ENSP00000265028	Hsap_ENSP00000314030	Hsap_ENSP00000369127	Hsap_ENSP00000378324 Ihof_1392	Ihof_2553	Ihof_2733	Ihof_3944	Ihof_5270	Ihof_7862 Mlei_ML216347a	Mlei_ML239514a	Mlei_ML37595a Mver_05084	Mver_07372	Mver_09471	Mver_11054 Mvib_comp10876_c0_seq1_m13684	Mvib_comp10962_c0_seq1_m13979	Mvib_comp66844_c0_seq1_m44362 Ngru_XP_002669360	Ngru_XP_002682407	Ngru_XP_002682948 Nvec_XP_001628754	Nvec_XP_001635397	Nvec_XP_001636828 Pgem_Unigene16896_Pirum_gemmatam10708	Pgem_Unigene8719_Pirum_gemmatam5606 Pyez_20048_g4933	Pyez_27327_g6725 Sarc4_g12917T
OG0000398 Acas_g11026	Acas_g14397	Acas_g15938	Acas_g3220	Acas_g4247	Acas_g8311 Aque_XP_003384346	Aque_XP_003384892 Atha_AT5G17770	Atha_AT5G20080 Awhi_Unigene17141_m10906	Awhi_Unigene17632_m11494	Awhi_Unigene18372_m12373	Awhi_Unigene23324_m15388 Cang_123545	Cang_130177	Cang_38264	Cang_54284	Cang_90035 Cfra_1730T1 Clim_g182	Clim_g3058 Cowc_CAOG_01121 Nk52_evm40s78	Nk52_evm4s327	Nk52_evm5s2325	Nk52_evm78s210 Ddis_XP_638259 Dmel_FBpp0074465	Dmel_FBpp0075810 Ehux_101090	Ehux_245144	Ehux_373005	Ehux_44617	Ehux_58134	Ehux_62515	Ehux_62759	Ehux_66963 Falb_H696_02068T0 Hsap_ENSP00000299498	Hsap_ENSP00000354468	Hsap_ENSP00000356218	Hsap_ENSP00000409075 Ihof_5647	Ihof_9928 Mlei_ML034310a	Mlei_ML182310a Mver_00730	Mver_00957	Mver_02823	Mver_05736	Mver_07521	Mver_09269 Mvib_comp10254_c0_seq1_m11841	Mvib_comp10727_c1_seq1_m13248	Mvib_comp13016_c0_seq1_m21565 Ngru_XP_002672567	Ngru_XP_002681617	Ngru_XP_002683485 Nvec_XP_001620700	Nvec_XP_001621812	Nvec_XP_001631871 Pgem_Unigene19520_Pirum_gemmatam12636	Pgem_Unigene28728_Pirum_gemmatam17220	Pgem_Unigene34859_Pirum_gemmatam21427 Pyez_22297_g5507	Pyez_39344_g9127 Sarc4_g2797T	Sarc4_g3985T Sdes_comp15529_c0_seq1m4483	Sdes_comp15529_c0_seq2m4485	Sdes_comp18173_c0_seq1m7689	Sdes_comp18173_c0_seq3m7690
OG0000399 Acas_g4203	Acas_g5508 Aque_XP_003386075	Aque_XP_003389829	Aque_XP_003390419 Atha_AT1G55805	Atha_AT5G09830	Atha_AT5G17560 Awhi_Unigene35386_m22483	Awhi_Unigene36248_m23410	Awhi_Unigene6988_m3993	Awhi_Unigene6989_m3995	Awhi_Unigene6990_m3996	Awhi_Unigene6991_m3998	Awhi_Unigene6992_m4000	Awhi_Unigene6993_m4002 Cang_129958	Cang_42747	Cang_45998	Cang_62869 Cfra_1040T1	Cfra_2864T1	Cfra_6812T1 Clim_g4679	Clim_g4747	Clim_g6049 Cowc_CAOG_02110	Cowc_CAOG_08920	Cowc_CAOG_10012 Nk52_evm13s2391	Nk52_evm2s884	Nk52_evm31s248	Nk52_evm57s217 Ddis_XP_635799	Ddis_XP_635922	Ddis_XP_644194	Ddis_XP_644296 Dmel_FBpp0071330	Dmel_FBpp0084043	Dmel_FBpp0086996 Ehux_194724	Ehux_446755	Ehux_452684	Ehux_452727	Ehux_61409	Ehux_77935 Falb_H696_02487T0	Falb_H696_03929T0 Hsap_ENSP00000306752	Hsap_ENSP00000331369	Hsap_ENSP00000358146 Ihof_4469	Ihof_6697	Ihof_7366 Mlei_ML01447a	Mlei_ML06332a Mver_02881	Mver_03250	Mver_05954 Mvib_comp3998_c0_seq1_m1964	Mvib_comp4323_c0_seq1_m2271 Ngru_XP_002671242	Ngru_XP_002680334	Ngru_XP_002681075 Nvec_XP_001617595	Nvec_XP_001622461 Pgem_Unigene24323_Pirum_gemmatam15503	Pgem_Unigene35266_Pirum_gemmatam21758 Pyez_27258_g6705	Pyez_34901_g8384 Sarc4_g11711T	Sarc4_g14423T
OG0000400 Acas_g15689	Acas_g8380	Acas_g9165 Aque_XP_003385934	Aque_XP_003391369 Atha_AT1G31812	Atha_AT4G24230	Atha_AT4G27780	Atha_AT5G53470 Awhi_Unigene13008_m8422	Awhi_Unigene17033_m10787	Awhi_Unigene17034_m10788	Awhi_Unigene40246_m25743 Cang_116697	Cang_63393 Cfra_1834T1	Cfra_5819T1 Clim_g4272	Clim_g4364	Clim_g882 Cowc_CAOG_00272	Cowc_CAOG_04291 Nk52_evm16s2133	Nk52_evm46s914	Nk52_evm63s485	Nk52_evm7s2579 Ddis_XP_635850	Ddis_XP_646321 Dmel_FBpp0076318	Dmel_FBpp0076622	Dmel_FBpp0076623	Dmel_FBpp0076624	Dmel_FBpp0076634	Dmel_FBpp0076922	Dmel_FBpp0077314	Dmel_FBpp0079256 Ehux_194846	Ehux_367378	Ehux_437132	Ehux_446168	Ehux_453412	Ehux_465193	Ehux_471218	Ehux_49359 Falb_H696_04444T0 Hsap_ENSP00000314440	Hsap_ENSP00000356567	Hsap_ENSP00000365049	Hsap_ENSP00000367453	Hsap_ENSP00000440698 Ihof_5844	Ihof_6935	Ihof_9466 Mlei_ML02954a	Mlei_ML05209a	Mlei_ML12347a	Mlei_ML14989a	Mlei_ML398327a Mver_02520	Mver_10552 Mvib_comp13409_c0_seq1_m23271	Mvib_comp14841_c0_seq1_m30886	Mvib_comp16388_c0_seq1_m43428 Ngru_XP_002676979	Ngru_XP_002678012 Nvec_XP_001619551	Nvec_XP_001622854	Nvec_XP_001627873	Nvec_XP_001634964
OG0000401 Aque_XP_003384799 Atha_AT1G14230	Atha_AT1G14240	Atha_AT1G14250	Atha_AT2G02970	Atha_AT3G04080	Atha_AT4G19180	Atha_AT5G18280 Awhi_Unigene17963_m11898	Awhi_Unigene19951_m13621	Awhi_Unigene34363_m21398 Cang_36030	Cang_42351 Cfra_1054T1	Cfra_2717T1	Cfra_7706T1 Clim_g3068	Clim_g944 Cowc_CAOG_08437 Nk52_evm21s239	Nk52_evm2s311	Nk52_evm36s266 Dmel_FBpp0077365 Ehux_108794	Ehux_195956	Ehux_208241	Ehux_208242	Ehux_210638	Ehux_213125	Ehux_235054	Ehux_251171	Ehux_423944	Ehux_435744	Ehux_52732	Ehux_52751 Falb_H696_00190T0 Hsap_ENSP00000301825	Hsap_ENSP00000335246	Hsap_ENSP00000347213	Hsap_ENSP00000351520	Hsap_ENSP00000359520	Hsap_ENSP00000360250	Hsap_ENSP00000360561	Hsap_ENSP00000365840 Ihof_3346	Ihof_3492 Mver_02854	Mver_03569 Mvib_comp12957_c0_seq1_m21252	Mvib_comp14985_c0_seq1_m31838	Mvib_comp14985_c0_seq2_m31840	Mvib_comp14985_c1_seq1_m31841	Mvib_comp9812_c1_seq1_m10740 Nvec_XP_001623684	Nvec_XP_001634634	Nvec_XP_001635974 Pgem_Unigene10732_Pirum_gemmatam7051	Pgem_Unigene11283_Pirum_gemmatam7357	Pgem_Unigene3850_Pirum_gemmatam2680	Pgem_Unigene40408_Pirum_gemmatam25059	Pgem_Unigene40722_Pirum_gemmatam25286	Pgem_Unigene40723_Pirum_gemmatam25287	Pgem_Unigene40724_Pirum_gemmatam25288 Pyez_19293_g4760	Pyez_19724_g4864	Pyez_26820_g6596 Sarc4_g30534T	Sarc4_g30535T
OG0000402 Acas_g4372 Atha_AT1G02850	Atha_AT1G26560	Atha_AT1G45191	Atha_AT1G47600	Atha_AT1G51470	Atha_AT1G51490	Atha_AT1G52400	Atha_AT1G60090	Atha_AT1G61810	Atha_AT1G61820	Atha_AT1G66270	Atha_AT1G66280	Atha_AT1G75940	Atha_AT2G25630	Atha_AT2G32860	Atha_AT2G44450	Atha_AT2G44460	Atha_AT2G44470	Atha_AT2G44480	Atha_AT2G44490	Atha_AT3G03640	Atha_AT3G09260	Atha_AT3G18070	Atha_AT3G18080	Atha_AT3G21370	Atha_AT3G60120	Atha_AT3G60130	Atha_AT3G60140	Atha_AT3G62740	Atha_AT3G62750	Atha_AT4G21760	Atha_AT4G22100	Atha_AT4G27820	Atha_AT4G27830	Atha_AT5G24540	Atha_AT5G24550	Atha_AT5G25980	Atha_AT5G26000	Atha_AT5G28510	Atha_AT5G36890	Atha_AT5G42260	Atha_AT5G44640	Atha_AT5G48375	Atha_AT5G54570 Awhi_Unigene11391_m7484	Awhi_Unigene6460_m3625 Nk52_evm24s2630 Dmel_FBpp0075080 Ehux_103655	Ehux_107040	Ehux_241132	Ehux_243099	Ehux_251358	Ehux_460392
OG0000403 Acas_g11470	Acas_g11479	Acas_g16771	Acas_g17370	Acas_g6618 Aque_XP_003388724	Aque_XP_003388727 Atha_AT1G52510	Atha_AT2G26740	Atha_AT2G26750	Atha_AT3G05600	Atha_AT3G51000	Atha_AT4G02340	Atha_AT4G12830	Atha_AT4G15955	Atha_AT4G15960 Awhi_Unigene15587_m9739	Awhi_Unigene29629_m18144	Awhi_Unigene31369_m18820	Awhi_Unigene41330_m26385	Awhi_Unigene8846_m6064 Cang_42765	Cang_48944	Cang_64616 Cfra_5202T1 Clim_g1732	Clim_g2095	Clim_g3691	Clim_g4520	Clim_g4931	Clim_g5197	Clim_g5618	Clim_g6140 Cowc_CAOG_02886	Cowc_CAOG_07772 Nk52_evm45s2496 Ehux_109045	Ehux_227959	Ehux_229035	Ehux_232548	Ehux_244413	Ehux_98492 Falb_H696_04299T0 Hsap_ENSP00000221730	Hsap_ENSP00000359410	Hsap_ENSP00000430269 Ihof_6567 Mlei_ML00712a Mver_03094	Mver_04492	Mver_08364	Mver_12285 Mvib_comp12707_c0_seq1_m20140	Mvib_comp14105_c1_seq1_m26693	Mvib_comp15700_c0_seq1_m37805	Mvib_comp57949_c0_seq1_m44207	Mvib_comp5939_c0_seq1_m3732 Ngru_XP_002669835	Ngru_XP_002670054	Ngru_XP_002672520	Ngru_XP_002677836 Nvec_XP_001639002	Nvec_XP_001641873 Pgem_Unigene18418_Pirum_gemmatam12008 Pyez_19673_g4835	Pyez_40492_g9291 Sarc4_g1135T_Sarc4_g1137T Sdes_comp18202_c0_seq1m7750	Sdes_comp18202_c0_seq2m7752 Skow_XP_002730984	Skow_XP_002735357	Skow_XP_002737334
OG0000404 Aque_XP_003383282	Aque_XP_003383545	Aque_XP_003383553	Aque_XP_003383554	Aque_XP_003383743	Aque_XP_003385328	Aque_XP_003385751	Aque_XP_003386185	Aque_XP_003387031	Aque_XP_003387032	Aque_XP_003387033	Aque_XP_003387035	Aque_XP_003387515	Aque_XP_003388621	Aque_XP_003388776	Aque_XP_003388777	Aque_XP_003388778	Aque_XP_003388779	Aque_XP_003390171	Aque_XP_003390172	Aque_XP_003390492	Aque_XP_003390911	Aque_XP_003390912	Aque_XP_003390913	Aque_XP_003391109	Aque_XP_003391181	Aque_XP_003391197	Aque_XP_003391204	Aque_XP_003391248	Aque_XP_003391412 Ddis_XP_629648	Ddis_XP_645327 Dmel_FBpp0071136	Dmel_FBpp0074051	Dmel_FBpp0111838 Ehux_199525 Hsap_ENSP00000261464	Hsap_ENSP00000262395	Hsap_ENSP00000332468	Hsap_ENSP00000337853	Hsap_ENSP00000352685	Hsap_ENSP00000362994 Ihof_7964 Mlei_ML06391a Nvec_XP_001617635	Nvec_XP_001620870	Nvec_XP_001622375	Nvec_XP_001622377	Nvec_XP_001623790	Nvec_XP_001623792	Nvec_XP_001624949	Nvec_XP_001624951	Nvec_XP_001627337	Nvec_XP_001628244	Nvec_XP_001629813	Nvec_XP_001630876	Nvec_XP_001630936
OG0000405 Aque_XP_003382425	Aque_XP_003383371	Aque_XP_003385174	Aque_XP_003385175	Aque_XP_003385176	Aque_XP_003385537	Aque_XP_003385541	Aque_XP_003385542	Aque_XP_003385619	Aque_XP_003385620	Aque_XP_003385621	Aque_XP_003385825	Aque_XP_003385826	Aque_XP_003387486	Aque_XP_003387487	Aque_XP_003387488	Aque_XP_003387623	Aque_XP_003387848	Aque_XP_003388059	Aque_XP_003388062	Aque_XP_003388262	Aque_XP_003388263	Aque_XP_003388338	Aque_XP_003389111	Aque_XP_003389112	Aque_XP_003389690	Aque_XP_003389691	Aque_XP_003389692	Aque_XP_003389693	Aque_XP_003390319	Aque_XP_003390434	Aque_XP_003390609	Aque_XP_003390792	Aque_XP_003390793	Aque_XP_003391228	Aque_XP_003391317	Aque_XP_003391538	Aque_XP_003391580	Aque_XP_003391609	Aque_XP_003391731	Aque_XP_003391735	Aque_XP_003391791	Aque_XP_003391819	Aque_XP_003391913	Aque_XP_003391950	Aque_XP_003391958 Mvib_comp11415_c1_seq1_m15510	Mvib_comp11415_c5_seq1_m15514	Mvib_comp13928_c2_seq1_m25778	Mvib_comp13928_c4_seq1_m25782	Mvib_comp272146_c0_seq1_m46887
OG0000406 Aque_XP_003386910	Aque_XP_003387736	Aque_XP_003388979	Aque_XP_003388992	Aque_XP_003389282	Aque_XP_003389283 Cowc_CAOG_01829	Cowc_CAOG_04627	Cowc_CAOG_04632 Ddis_XP_641492 Dmel_FBpp0082614	Dmel_FBpp0110259	Dmel_FBpp0112023	Dmel_FBpp0290305	Dmel_FBpp0290391	Dmel_FBpp0291051 Falb_H696_00995T0	Falb_H696_01957T0	Falb_H696_02331T0 Hsap_ENSP00000251582	Hsap_ENSP00000261862	Hsap_ENSP00000268070	Hsap_ENSP00000270328	Hsap_ENSP00000274181	Hsap_ENSP00000274487	Hsap_ENSP00000282849	Hsap_ENSP00000284984	Hsap_ENSP00000284987	Hsap_ENSP00000286657	Hsap_ENSP00000286744	Hsap_ENSP00000299164	Hsap_ENSP00000356975	Hsap_ENSP00000358035	Hsap_ENSP00000360997	Hsap_ENSP00000362304	Hsap_ENSP00000369921	Hsap_ENSP00000370443	Hsap_ENSP00000373472	Hsap_ENSP00000374071	Hsap_ENSP00000376781	Hsap_ENSP00000399364	Hsap_ENSP00000403403	Hsap_ENSP00000405370	Hsap_ENSP00000418735	Hsap_ENSP00000422554 Mlei_ML017312a Mvib_comp13910_c1_seq1_m25691	Mvib_comp15332_c0_seq2_m34227	Mvib_comp15832_c0_seq1_m39574 Nvec_XP_001620249	Nvec_XP_001620643	Nvec_XP_001620798	Nvec_XP_001621477	Nvec_XP_001622765	Nvec_XP_001624400	Nvec_XP_001624616	Nvec_XP_001626083	Nvec_XP_001626086
OG0000407 Aque_XP_003384604	Aque_XP_003384605 Dmel_FBpp0070332	Dmel_FBpp0076448	Dmel_FBpp0077870	Dmel_FBpp0077941	Dmel_FBpp0078044	Dmel_FBpp0079350	Dmel_FBpp0081210	Dmel_FBpp0082035	Dmel_FBpp0085071	Dmel_FBpp0099955	Dmel_FBpp0112948 Hsap_ENSP00000000442	Hsap_ENSP00000206249	Hsap_ENSP00000262735	Hsap_ENSP00000287820	Hsap_ENSP00000291442	Hsap_ENSP00000316769	Hsap_ENSP00000320447	Hsap_ENSP00000325819	Hsap_ENSP00000333122	Hsap_ENSP00000333275	Hsap_ENSP00000343807	Hsap_ENSP00000343925	Hsap_ENSP00000352900	Hsap_ENSP00000355904	Hsap_ENSP00000356958	Hsap_ENSP00000357979	Hsap_ENSP00000363817	Hsap_ENSP00000370270	Hsap_ENSP00000377721	Hsap_ENSP00000377947	Hsap_ENSP00000379701	Hsap_ENSP00000381820	Hsap_ENSP00000385865	Hsap_ENSP00000419692	Hsap_ENSP00000447149 Mlei_ML13704a	Mlei_ML305522a Nvec_XP_001619117	Nvec_XP_001619949	Nvec_XP_001624292	Nvec_XP_001624815	Nvec_XP_001629708	Nvec_XP_001630385	Nvec_XP_001630386	Nvec_XP_001631058	Nvec_XP_001631902	Nvec_XP_001632045	Nvec_XP_001634258	Nvec_XP_001634340	Nvec_XP_001634378	Nvec_XP_001634999
[truncated: 18,389 more rows]
[truncated: 1,389 more columns]
