# Supplementary material for: A unicellular relative of animals generates a layer of polarized cells by actomyosin-dependent cellularization
Source: eLife. 2019 Oct 28;8:e49801. doi: 10.7554/eLife.49801 (PMC6855841; doi:10.7554/eLife.49801)
Supplement: Figure 4—source data 5. — Gene ages range from 1 (S. arctica-specific) to 10 (pan-eukaryotic). Only transcripts that were classified in an orthogroup are listed; the remainder of the transcripts were S. arctica-specific. [file elife-49801-fig4-data5.csv]

OG	gene	age
OG0000000	Sarc4_g11463T	10
OG0000000	Sarc4_g12259T	10
OG0000000	Sarc4_g20683T	10
OG0000000	Sarc4_g981T	10
OG0000000	Sarc4_g29305T	10
OG0000000	Sarc4_g3251T	10
OG0000000	Sarc4_g5152T	10
OG0000000	Sarc4_g20161T	10
OG0000000	Sarc4_g29129T_Sarc4_g29131T	10
OG0000000	Sarc4_g4120T	10
OG0000000	Sarc4_g9885T	10
OG0000000	Sarc4_g24704T	10
OG0000000	Sarc4_g20682T	10
OG0000000	Sarc4_g18241T	10
OG0000000	Sarc4_g15228T	10
OG0000000	Sarc4_g6917T	10
OG0000000	Sarc4_g26901T	10
OG0000000	Sarc4_g13128T	10
OG0000000	Sarc4_g14534T	10
OG0000000	Sarc4_g32771T	10
OG0000000	Sarc4_g30238T	10
OG0000000	Sarc4_g31832T	10
OG0000000	Sarc4_g23647T	10
OG0000000	Sarc4_g24980T	10
OG0000000	Sarc4_g11734T	10
OG0000000	Sarc4_g21346T	10
OG0000000	Sarc4_g19156T	10
OG0000000	Sarc4_g18804T	10
OG0000000	Sarc4_g8666T_Sarc4_g8673T	10
OG0000000	Sarc4_g29190T	10
OG0000000	Sarc4_g12447T	10
OG0000000	Sarc4_g24120T	10
OG0000000	Sarc4_g3925T	10
OG0000000	Sarc4_g20424T	10
OG0000000	Sarc4_g25986T	10
OG0000000	Sarc4_g3222T	10
OG0000000	Sarc4_g24452T	10
OG0000000	Sarc4_g24842T	10
OG0000000	Sarc4_g11736T	10
OG0000000	Sarc4_g21351T	10
OG0000000	Sarc4_g1279T	10
OG0000001	Sarc4_g27143T	10
OG0000001	Sarc4_g26629T	10
OG0000001	Sarc4_g10035T	10
OG0000001	Sarc4_g26494T	10
OG0000001	Sarc4_g27877T	10
OG0000001	Sarc4_g27159T	10
OG0000001	Sarc4_g27341T	10
OG0000001	Sarc4_g27355T	10
OG0000001	Sarc4_g28589T	10
OG0000001	Sarc4_g27905T	10
OG0000001	Sarc4_g28720T	10
OG0000001	Sarc4_g28232T	10
OG0000001	Sarc4_g11314T	10
OG0000001	Sarc4_g27141T	10
OG0000001	Sarc4_g28332T	10
OG0000001	Sarc4_g2598T	10
OG0000001	Sarc4_g26199T	10
OG0000001	Sarc4_g28424T	10
OG0000001	Sarc4_g28452T	10
OG0000001	Sarc4_g27330T	10
OG0000001	Sarc4_g29310T	10
OG0000001	Sarc4_g29498T	10
OG0000001	Sarc4_g27406T	10
OG0000001	Sarc4_g29627T	10
OG0000001	Sarc4_g27422T	10
OG0000001	Sarc4_g29766T	10
OG0000001	Sarc4_g29818T	10
OG0000001	Sarc4_g28825T	10
OG0000001	Sarc4_g28867T	10
OG0000001	Sarc4_g27237T	10
OG0000001	Sarc4_g27284T	10
OG0000001	Sarc4_g29993T	10
OG0000001	Sarc4_g30006T	10
OG0000001	Sarc4_g27906T	10
OG0000001	Sarc4_g30156T	10
OG0000001	Sarc4_g26877T	10
OG0000001	Sarc4_g27960T	10
OG0000001	Sarc4_g30510T	10
OG0000001	Sarc4_g30528T	10
OG0000001	Sarc4_g28233T	10
OG0000001	Sarc4_g28279T	10
OG0000001	Sarc4_g30987T	10
OG0000001	Sarc4_g31125T	10
OG0000001	Sarc4_g27874T	10
OG0000001	Sarc4_g31253T	10
OG0000001	Sarc4_g31346T	10
OG0000001	Sarc4_g28459T	10
OG0000001	Sarc4_g28464T	10
OG0000001	Sarc4_g3159T	10
OG0000001	Sarc4_g31610T	10
OG0000001	Sarc4_g31615T	10
OG0000001	Sarc4_g26990T	10
OG0000001	Sarc4_g31709T	10
OG0000001	Sarc4_g28807T	10
OG0000001	Sarc4_g31780T	10
OG0000001	Sarc4_g31804T	10
OG0000001	Sarc4_g31248T	10
OG0000001	Sarc4_g10755T	10
OG0000001	Sarc4_g29222T	10
OG0000001	Sarc4_g32000T	10
OG0000001	Sarc4_g32033T	10
OG0000001	Sarc4_g32085T	10
OG0000001	Sarc4_g27365T	10
OG0000001	Sarc4_g32101T	10
OG0000001	Sarc4_g32106T	10
OG0000001	Sarc4_g32111T	10
OG0000001	Sarc4_g32116T	10
OG0000001	Sarc4_g29871T	10
OG0000001	Sarc4_g27590T	10
OG0000001	Sarc4_g31860T	10
OG0000001	Sarc4_g29989T	10
OG0000001	Sarc4_g32400T	10
OG0000001	Sarc4_g32402T	10
OG0000001	Sarc4_g32453T	10
OG0000001	Sarc4_g32674T	10
OG0000001	Sarc4_g30367T	10
OG0000001	Sarc4_g32735T	10
OG0000001	Sarc4_g32740T	10
OG0000001	Sarc4_g32779T	10
OG0000001	Sarc4_g30766T	10
OG0000001	Sarc4_g30962T	10
OG0000001	Sarc4_g32852T	10
OG0000001	Sarc4_g257T	10
OG0000001	Sarc4_g11331T	10
OG0000001	Sarc4_g33065T	10
OG0000001	Sarc4_g33259T	10
OG0000001	Sarc4_g33321T	10
OG0000001	Sarc4_g31418T	10
OG0000001	Sarc4_g26682T	10
OG0000001	Sarc4_g26771T	10
OG0000001	Sarc4_g33682T	10
OG0000001	Sarc4_g31693T	10
OG0000001	Sarc4_g33936T	10
OG0000001	Sarc4_g27018T	10
OG0000001	Sarc4_g3463T	10
OG0000001	Sarc4_g3510T	10
OG0000001	Sarc4_g3513T	10
OG0000001	Sarc4_g3599T	10
OG0000001	Sarc4_g31928T	10
OG0000001	Sarc4_g27322T	10
OG0000001	Sarc4_g3856T	10
OG0000001	Sarc4_g3876T	10
OG0000001	Sarc4_g4044T	10
OG0000001	Sarc4_g4047T	10
OG0000001	Sarc4_g4056T	10
OG0000001	Sarc4_g424T	10
OG0000001	Sarc4_g27502T	10
OG0000001	Sarc4_g32138T	10
OG0000001	Sarc4_g2987T	10
OG0000001	Sarc4_g32177T	10
OG0000001	Sarc4_g3231T	10
OG0000001	Sarc4_g4586T	10
OG0000001	Sarc4_g4698T	10
OG0000001	Sarc4_g4768T	10
OG0000001	Sarc4_g4913T	10
OG0000001	Sarc4_g27936T	10
OG0000001	Sarc4_g27937T	10
OG0000001	Sarc4_g4987T	10
OG0000001	Sarc4_g5012T	10
OG0000001	Sarc4_g5317T	10
OG0000001	Sarc4_g5332T	10
OG0000001	Sarc4_g5406T	10
OG0000001	Sarc4_g5415T	10
OG0000001	Sarc4_g28350T	10
OG0000001	Sarc4_g28387T	10
OG0000001	Sarc4_g5601T	10
OG0000001	Sarc4_g5635T	10
OG0000001	Sarc4_g26661T	10
OG0000001	Sarc4_g570T	10
OG0000001	Sarc4_g572T	10
OG0000001	Sarc4_g28663T	10
OG0000001	Sarc4_g5869T	10
OG0000001	Sarc4_g5936T	10
OG0000001	Sarc4_g5997T	10
OG0000001	Sarc4_g6068T	10
OG0000001	Sarc4_g6136T	10
OG0000001	Sarc4_g614T	10
OG0000001	Sarc4_g6156T	10
OG0000001	Sarc4_g3628T	10
OG0000001	Sarc4_g6299T	10
OG0000001	Sarc4_g29289T	10
OG0000001	Sarc4_g6450T	10
OG0000001	Sarc4_g6491T	10
OG0000001	Sarc4_g6506T	10
OG0000001	Sarc4_g6520T	10
OG0000001	Sarc4_g29646T	10
OG0000001	Sarc4_g11369T	10
OG0000001	Sarc4_g6908T	10
OG0000001	Sarc4_g7119T	10
OG0000001	Sarc4_g4448T	10
OG0000001	Sarc4_g29987T	10
OG0000001	Sarc4_g733T	10
OG0000001	Sarc4_g7441T	10
OG0000001	Sarc4_g744T	10
OG0000001	Sarc4_g30022T	10
OG0000001	Sarc4_g767T	10
OG0000001	Sarc4_g7758T	10
OG0000001	Sarc4_g3036T	10
OG0000001	Sarc4_g7855T	10
OG0000001	Sarc4_g7926T	10
OG0000001	Sarc4_g7937T	10
OG0000001	Sarc4_g8094T	10
OG0000001	Sarc4_g8234T	10
OG0000001	Sarc4_g8255T	10
OG0000001	Sarc4_g8338T	10
OG0000001	Sarc4_g8395T	10
OG0000001	Sarc4_g8445T	10
OG0000001	Sarc4_g5675T	10
OG0000001	Sarc4_g8546T	10
OG0000001	Sarc4_g8746T	10
OG0000001	Sarc4_g8794T	10
OG0000001	Sarc4_g8823T	10
OG0000001	Sarc4_g9027T	10
OG0000001	Sarc4_g9034T	10
OG0000001	Sarc4_g9082T	10
OG0000001	Sarc4_g9083T	10
OG0000001	Sarc4_g9320T	10
OG0000001	Sarc4_g9342T	10
OG0000001	Sarc4_g6227T	10
OG0000001	Sarc4_g9446T	10
OG0000001	Sarc4_g9569T	10
OG0000001	Sarc4_g9827T	10
OG0000001	Sarc4_g9846T	10
OG0000001	Sarc4_g32096T	10
OG0000001	Sarc4_g9878T	10
OG0000001	Sarc4_g9928T	10
OG0000001	Sarc4_g19122T	10
OG0000001	Sarc4_g13760T	10
OG0000001	Sarc4_g19123T	10
OG0000001	Sarc4_g71T	10
OG0000001	Sarc4_g12769T	10
OG0000001	Sarc4_g25237T	10
OG0000001	Sarc4_g19278T	10
OG0000001	Sarc4_g13892T	10
OG0000001	Sarc4_g19380T	10
OG0000001	Sarc4_g25303T	10
OG0000001	Sarc4_g32725T	10
OG0000001	Sarc4_g1145T	10
OG0000001	Sarc4_g19650T	10
OG0000001	Sarc4_g13951T	10
OG0000001	Sarc4_g32847T	10
OG0000001	Sarc4_g32849T	10
OG0000001	Sarc4_g19828T	10
OG0000001	Sarc4_g25745T	10
OG0000001	Sarc4_g19891T	10
OG0000001	Sarc4_g14111T	10
OG0000001	Sarc4_g19894T	10
OG0000001	Sarc4_g16724T	10
OG0000001	Sarc4_g33344T	10
OG0000001	Sarc4_g11301T	10
OG0000001	Sarc4_g3353T	10
OG0000001	Sarc4_g1309T	10
OG0000001	Sarc4_g33697T	10
OG0000001	Sarc4_g10253T	10
OG0000001	Sarc4_g3457T	10
OG0000001	Sarc4_g11027T	10
OG0000001	Sarc4_g20176T	10
OG0000001	Sarc4_g14156T	10
OG0000001	Sarc4_g20316T	10
OG0000001	Sarc4_g17126T	10
OG0000001	Sarc4_g3855T	10
OG0000001	Sarc4_g13120T	10
OG0000001	Sarc4_g2047T	10
OG0000001	Sarc4_g1424T	10
OG0000001	Sarc4_g21377T	10
OG0000001	Sarc4_g17152T	10
OG0000001	Sarc4_g21425T	10
OG0000001	Sarc4_g18263T	10
OG0000001	Sarc4_g21504T	10
OG0000001	Sarc4_g27536T	10
OG0000001	Sarc4_g13264T	10
OG0000001	Sarc4_g27787T	10
OG0000001	Sarc4_g1085T	10
OG0000001	Sarc4_g10378T	10
OG0000001	Sarc4_g2161T	10
OG0000001	Sarc4_g14450T	10
OG0000001	Sarc4_g4954T	10
OG0000001	Sarc4_g4955T	10
OG0000001	Sarc4_g13272T	10
OG0000001	Sarc4_g2175T	10
OG0000001	Sarc4_g22001T	10
OG0000001	Sarc4_g12033T	10
OG0000001	Sarc4_g22050T	10
OG0000001	Sarc4_g17632T	10
OG0000001	Sarc4_g543T	10
OG0000001	Sarc4_g13277T	10
OG0000001	Sarc4_g22295T	10
OG0000001	Sarc4_g14866T	10
OG0000001	Sarc4_g22300T	10
OG0000001	Sarc4_g17783T	10
OG0000001	Sarc4_g22304T	10
OG0000001	Sarc4_g577T	10
OG0000001	Sarc4_g13408T	10
OG0000001	Sarc4_g15259T	10
OG0000001	Sarc4_g22516T	10
OG0000001	Sarc4_g28797T	10
OG0000001	Sarc4_g22519T	10
OG0000001	Sarc4_g28803T	10
OG0000001	Sarc4_g13460T	10
OG0000001	Sarc4_g15425T	10
OG0000001	Sarc4_g22525T	10
OG0000001	Sarc4_g29084T	10
OG0000001	Sarc4_g22527T	10
OG0000001	Sarc4_g1242T	10
OG0000001	Sarc4_g13521T	10
OG0000001	Sarc4_g29626T	10
OG0000001	Sarc4_g2268T	10
OG0000001	Sarc4_g24929T	10
OG0000001	Sarc4_g22751T	10
OG0000001	Sarc4_g670T	10
OG0000001	Sarc4_g13601T	10
OG0000001	Sarc4_g7271T	10
OG0000001	Sarc4_g11489T	10
OG0000001	Sarc4_g18429T	10
OG0000001	Sarc4_g22965T	10
OG0000001	Sarc4_g25301T	10
OG0000001	Sarc4_g13602T	10
OG0000001	Sarc4_g15640T	10
OG0000001	Sarc4_g7850T	10
OG0000001	Sarc4_g10080T	10
OG0000001	Sarc4_g23041T	10
OG0000001	Sarc4_g23109T	10
OG0000001	Sarc4_g13603T	10
OG0000001	Sarc4_g23280T	10
OG0000001	Sarc4_g23538T	10
OG0000001	Sarc4_g23554T	10
OG0000001	Sarc4_g23556T	10
OG0000001	Sarc4_g13604T	10
OG0000001	Sarc4_g23630T	10
OG0000001	Sarc4_g23743T	10
OG0000001	Sarc4_g23801T	10
OG0000001	Sarc4_g23812T	10
OG0000001	Sarc4_g13605T	10
OG0000001	Sarc4_g23885T	10
OG0000001	Sarc4_g24103T	10
OG0000001	Sarc4_g24104T	10
OG0000001	Sarc4_g24112T	10
OG0000001	Sarc4_g13606T	10
OG0000001	Sarc4_g24325T	10
OG0000001	Sarc4_g31924T	10
OG0000001	Sarc4_g11302T	10
OG0000001	Sarc4_g24507T	10
OG0000001	Sarc4_g13703T	10
OG0000001	Sarc4_g24571T	10
OG0000001	Sarc4_g9863T	10
OG0000001	Sarc4_g11570T	10
OG0000001	Sarc4_g24918T	10
OG0000001	Sarc4_g14318T	10
OG0000001	Sarc4_g16285T	10
OG0000001	Sarc4_g24964T	10
OG0000001	Sarc4_g24971T	10
OG0000001	Sarc4_g13775T	10
OG0000001	Sarc4_g12251T	10
OG0000001	Sarc4_g25297T	10
OG0000001	Sarc4_g21579T	10
OG0000001	Sarc4_g17312T	10
OG0000001	Sarc4_g16405T	10
OG0000001	Sarc4_g13932T	10
OG0000001	Sarc4_g25315T	10
OG0000001	Sarc4_g25379T	10
OG0000001	Sarc4_g18497T	10
OG0000001	Sarc4_g25617T	10
OG0000001	Sarc4_g13060T	10
OG0000001	Sarc4_g1400T	10
OG0000001	Sarc4_g10345T	10
OG0000001	Sarc4_g25799T	10
OG0000001	Sarc4_g32930T	10
OG0000001	Sarc4_g33022T	10
OG0000001	Sarc4_g1241T	10
OG0000001	Sarc4_g14116T	10
OG0000001	Sarc4_g31393T	10
OG0000001	Sarc4_g33379T	10
OG0000001	Sarc4_g1412T	10
OG0000001	Sarc4_g18092T	10
OG0000001	Sarc4_g2695T	10
OG0000001	Sarc4_g11940T	10
OG0000001	Sarc4_g20158T	10
OG0000001	Sarc4_g17089T	10
OG0000001	Sarc4_g10925T	10
OG0000001	Sarc4_g18191T	10
OG0000001	Sarc4_g22523T	10
OG0000001	Sarc4_g14162T	10
OG0000001	Sarc4_g20358T	10
OG0000001	Sarc4_g17129T	10
OG0000001	Sarc4_g24550T	10
OG0000001	Sarc4_g18221T	10
OG0000001	Sarc4_g22608T	10
OG0000001	Sarc4_g12080T	10
OG0000001	Sarc4_g15452T	10
OG0000001	Sarc4_g427T	10
OG0000001	Sarc4_g4375T	10
OG0000001	Sarc4_g11100T	10
OG0000001	Sarc4_g17309T	10
OG0000001	Sarc4_g14398T	10
OG0000001	Sarc4_g22848T	10
OG0000001	Sarc4_g15538T	10
OG0000001	Sarc4_g25299T	10
OG0000001	Sarc4_g7672T	10
OG0000001	Sarc4_g17499T	10
OG0000001	Sarc4_g14554T	10
OG0000001	Sarc4_g16484T	10
OG0000001	Sarc4_g28169T	10
OG0000001	Sarc4_g25427T	10
OG0000001	Sarc4_g1456T	10
OG0000001	Sarc4_g15785T	10
OG0000001	Sarc4_g14692T	10
OG0000001	Sarc4_g22068T	10
OG0000001	Sarc4_g5478T	10
OG0000001	Sarc4_g29065T	10
OG0000001	Sarc4_g18813T	10
OG0000001	Sarc4_g23600T	10
OG0000001	Sarc4_g14880T	10
OG0000001	Sarc4_g18987T	10
OG0000001	Sarc4_g15983T	10
OG0000001	Sarc4_g2234T	10
OG0000001	Sarc4_g19010T	10
OG0000001	Sarc4_g18190T	10
OG0000001	Sarc4_g15289T	10
OG0000001	Sarc4_g19025T	10
OG0000001	Sarc4_g16033T	10
OG0000001	Sarc4_g19089T	10
OG0000001	Sarc4_g16368T	10
OG0000001	Sarc4_g18195T	10
OG0000001	Sarc4_g15447T	10
OG0000001	Sarc4_g632T	10
OG0000001	Sarc4_g16149T	10
OG0000001	Sarc4_g24605T	10
OG0000001	Sarc4_g19121T	10
OG0000001	Sarc4_g13720T	10
OG0000001	Sarc4_g15464T	10
OG0000001	Sarc4_g24940T	10
OG0000001	Sarc4_g18351T	10
OG0000001	Sarc4_g15522T	10
OG0000001	Sarc4_g19210T	10
OG0000001	Sarc4_g15907T	10
OG0000001	Sarc4_g1717T	10
OG0000001	Sarc4_g11166T	10
OG0000001	Sarc4_g19119T	10
OG0000001	Sarc4_g12628T	10
OG0000001	Sarc4_g19635T	10
OG0000001	Sarc4_g11471T	10
OG0000001	Sarc4_g15666T	10
OG0000001	Sarc4_g17609T	10
OG0000001	Sarc4_g18623T	10
OG0000001	Sarc4_g19824T	10
OG0000001	Sarc4_g23127T	10
OG0000001	Sarc4_g18671T	10
OG0000001	Sarc4_g21530T	10
OG0000001	Sarc4_g9417T	10
OG0000001	Sarc4_g17634T	10
OG0000001	Sarc4_g14330T	10
OG0000001	Sarc4_g12246T	10
OG0000001	Sarc4_g19974T	10
OG0000001	Sarc4_g12291T	10
OG0000001	Sarc4_g23878T	10
OG0000001	Sarc4_g16876T	10
OG0000001	Sarc4_g16030T	10
OG0000001	Sarc4_g31716T	10
OG0000001	Sarc4_g1629T	10
OG0000001	Sarc4_g32156T	10
OG0000001	Sarc4_g16709T	10
OG0000001	Sarc4_g4514T	10
OG0000001	Sarc4_g16065T	10
OG0000001	Sarc4_g25305T	10
OG0000001	Sarc4_g24339T	10
OG0000001	Sarc4_g19094T	10
OG0000001	Sarc4_g19120T	10
OG0000001	Sarc4_g14151T	10
OG0000001	Sarc4_g23003T	10
OG0000001	Sarc4_g24682T	10
OG0000001	Sarc4_g65T	10
OG0000001	Sarc4_g10567T	10
OG0000001	Sarc4_g27510T	10
OG0000001	Sarc4_g12407T	10
OG0000001	Sarc4_g25727T	10
OG0000001	Sarc4_g21640T	10
OG0000001	Sarc4_g15926T	10
OG0000001	Sarc4_g12743T	10
OG0000001	Sarc4_g8490T	10
OG0000001	Sarc4_g16624T	10
OG0000001	Sarc4_g24113T	10
OG0000001	Sarc4_g20141T	10
OG0000001	Sarc4_g16862T	10
OG0000001	Sarc4_g22799T	10
OG0000001	Sarc4_g12675T	10
OG0000001	Sarc4_g22999T	10
OG0000001	Sarc4_g18471T	10
OG0000001	Sarc4_g24332T	10
OG0000001	Sarc4_g20152T	10
OG0000001	Sarc4_g25230T	10
OG0000001	Sarc4_g25700T	10
OG0000001	Sarc4_g4282T	10
OG0000002	Sarc4_g8472T_Sarc4_g8473T	10
OG0000002	Sarc4_g31878T	10
OG0000002	Sarc4_g27337T	10
OG0000002	Sarc4_g29337T	10
OG0000002	Sarc4_g23709T_Sarc4_g23711T_Sarc4_g23712T	10
OG0000002	Sarc4_g29515T	10
OG0000002	Sarc4_g23312T	10
OG0000002	Sarc4_g14701T	10
OG0000002	Sarc4_g8678T	10
OG0000003	Sarc4_g29779T	10
OG0000003	Sarc4_g7484T	10
OG0000004	Sarc4_g12518T	10
OG0000004	Sarc4_g33872T	10
OG0000004	Sarc4_g13401T	10
OG0000004	Sarc4_g14793T	10
OG0000004	Sarc4_g16459T	10
OG0000004	Sarc4_g12021T	10
OG0000004	Sarc4_g9333T	10
OG0000004	Sarc4_g16460T	10
OG0000004	Sarc4_g7365T	10
OG0000004	Sarc4_g7282T	10
OG0000004	Sarc4_g14792T	10
OG0000005	Sarc4_g5838T	10
OG0000005	Sarc4_g32265T	10
OG0000005	Sarc4_g22056T	10
OG0000005	Sarc4_g12305T	10
OG0000005	Sarc4_g25454T	10
OG0000005	Sarc4_g32867T	10
OG0000005	Sarc4_g30619T	10
OG0000005	Sarc4_g5191T	10
OG0000005	Sarc4_g22040T	10
OG0000005	Sarc4_g9574T	10
OG0000005	Sarc4_g32264T	10
OG0000006	Sarc4_g12512T	10
OG0000006	Sarc4_g1801T	10
OG0000006	Sarc4_g27010T	10
OG0000006	Sarc4_g33315T	10
OG0000006	Sarc4_g21083T	10
OG0000006	Sarc4_g1826T	10
OG0000006	Sarc4_g21638T	10
OG0000006	Sarc4_g32695T	10
OG0000006	Sarc4_g2404T	10
OG0000006	Sarc4_g19198T	10
OG0000006	Sarc4_g25838T	10
OG0000006	Sarc4_g1837T	10
OG0000006	Sarc4_g7139T	10
OG0000006	Sarc4_g25153T	10
OG0000006	Sarc4_g12503T	10
OG0000006	Sarc4_g12491T	10
OG0000006	Sarc4_g13499T	10
OG0000006	Sarc4_g26869T	10
OG0000006	Sarc4_g31028T	10
OG0000006	Sarc4_g8957T	10
OG0000006	Sarc4_g12497T	10
OG0000006	Sarc4_g24812T	10
OG0000006	Sarc4_g5156T	10
OG0000006	Sarc4_g20832T	10
OG0000006	Sarc4_g12485T	10
OG0000006	Sarc4_g7716T	10
OG0000006	Sarc4_g6425T	10
OG0000006	Sarc4_g25012T	10
OG0000006	Sarc4_g19412T	10
OG0000007	Sarc4_g2167T	10
OG0000007	Sarc4_g30953T	10
OG0000007	Sarc4_g28725T_Sarc4_g28726T	10
OG0000007	Sarc4_g8350T	10
OG0000007	Sarc4_g25075T	10
OG0000007	Sarc4_g2433T	10
OG0000007	Sarc4_g12221T	10
OG0000007	Sarc4_g5427T	10
OG0000007	Sarc4_g11523T	10
OG0000007	Sarc4_g12053T	10
OG0000007	Sarc4_g9958T	10
OG0000007	Sarc4_g12778T	10
OG0000007	Sarc4_g4893T	10
OG0000007	Sarc4_g9598T	10
OG0000007	Sarc4_g31091T	10
OG0000008	Sarc4_g32370T	10
OG0000008	Sarc4_g30364T	10
OG0000008	Sarc4_g28942T	10
OG0000008	Sarc4_g25170T	10
OG0000008	Sarc4_g5611T	10
OG0000008	Sarc4_g25768T	10
OG0000008	Sarc4_g5592T	10
OG0000008	Sarc4_g4460T	10
OG0000008	Sarc4_g220T	10
OG0000008	Sarc4_g14385T	10
OG0000008	Sarc4_g27733T	10
OG0000008	Sarc4_g7020T	10
OG0000008	Sarc4_g7788T	10
OG0000008	Sarc4_g24257T	10
OG0000008	Sarc4_g845T	10
OG0000008	Sarc4_g24642T	10
OG0000008	Sarc4_g30798T	10
OG0000008	Sarc4_g19052T	10
OG0000008	Sarc4_g6663T	10
OG0000008	Sarc4_g24643T	10
OG0000008	Sarc4_g9061T	10
OG0000008	Sarc4_g9267T	10
OG0000008	Sarc4_g10667T	10
OG0000008	Sarc4_g14389T	10
OG0000008	Sarc4_g25294T	10
OG0000008	Sarc4_g26129T	10
OG0000008	Sarc4_g8501T	10
OG0000008	Sarc4_g8836T	10
OG0000008	Sarc4_g4023T	10
OG0000008	Sarc4_g24261T	10
OG0000008	Sarc4_g4453T	10
OG0000008	Sarc4_g31460T	10
OG0000008	Sarc4_g24263T	10
OG0000008	Sarc4_g30847T	10
OG0000008	Sarc4_g25613T	10
OG0000008	Sarc4_g28862T	10
OG0000008	Sarc4_g32360T	10
OG0000008	Sarc4_g18149T	10
OG0000008	Sarc4_g2462T	10
OG0000008	Sarc4_g9914T	10
OG0000008	Sarc4_g10122T	10
OG0000008	Sarc4_g2463T	10
OG0000008	Sarc4_g30605T	10
OG0000008	Sarc4_g12300T	10
OG0000008	Sarc4_g1306T	10
OG0000008	Sarc4_g1325T	10
OG0000008	Sarc4_g1873T	10
OG0000008	Sarc4_g21430T	10
OG0000008	Sarc4_g31161T	10
OG0000008	Sarc4_g30800T	10
OG0000008	Sarc4_g31181T	10
OG0000008	Sarc4_g28946T	10
OG0000008	Sarc4_g5686T	10
OG0000008	Sarc4_g33422T	10
OG0000008	Sarc4_g28950T	10
OG0000008	Sarc4_g3652T	10
OG0000008	Sarc4_g28954T	10
OG0000008	Sarc4_g27711T	10
OG0000008	Sarc4_g7019T	10
OG0000008	Sarc4_g28962T	10
OG0000008	Sarc4_g11611T	10
OG0000008	Sarc4_g1348T	10
OG0000008	Sarc4_g219T	10
OG0000008	Sarc4_g24988T	10
OG0000008	Sarc4_g31949T	10
OG0000008	Sarc4_g18936T	10
OG0000008	Sarc4_g32040T	10
OG0000008	Sarc4_g25497T	10
OG0000008	Sarc4_g32041T	10
OG0000008	Sarc4_g27923T	10
OG0000008	Sarc4_g1867T	10
OG0000008	Sarc4_g24966T	10
OG0000008	Sarc4_g32063T	10
OG0000008	Sarc4_g28709T	10
OG0000008	Sarc4_g32128T	10
OG0000008	Sarc4_g30363T	10
OG0000008	Sarc4_g1095T	10
OG0000008	Sarc4_g2449T	10
OG0000008	Sarc4_g27052T	10
OG0000008	Sarc4_g32650T	10
OG0000008	Sarc4_g30921T	10
OG0000008	Sarc4_g5692T	10
OG0000008	Sarc4_g3269T	10
OG0000008	Sarc4_g21413T	10
OG0000008	Sarc4_g16147T	10
OG0000008	Sarc4_g31160T	10
OG0000008	Sarc4_g26539T	10
OG0000008	Sarc4_g30799T	10
OG0000008	Sarc4_g32991T	10
OG0000008	Sarc4_g15845T	10
OG0000008	Sarc4_g11577T	10
OG0000008	Sarc4_g30820T	10
OG0000008	Sarc4_g24255T	10
OG0000008	Sarc4_g30801T	10
OG0000008	Sarc4_g11616T	10
OG0000008	Sarc4_g3597T	10
OG0000008	Sarc4_g11031T	10
OG0000008	Sarc4_g8944T	10
OG0000008	Sarc4_g11198T	10
OG0000008	Sarc4_g30819T	10
OG0000008	Sarc4_g17041T	10
OG0000008	Sarc4_g9998T	10
OG0000008	Sarc4_g9266T	10
OG0000008	Sarc4_g23099T	10
OG0000008	Sarc4_g30848T	10
OG0000008	Sarc4_g21278T	10
OG0000008	Sarc4_g32012T	10
OG0000008	Sarc4_g30822T	10
OG0000008	Sarc4_g1326T	10
OG0000008	Sarc4_g228T	10
OG0000008	Sarc4_g255T	10
OG0000008	Sarc4_g17125T	10
OG0000008	Sarc4_g9997T	10
OG0000008	Sarc4_g24275T	10
OG0000008	Sarc4_g14745T	10
OG0000008	Sarc4_g1869T	10
OG0000008	Sarc4_g32805T	10
OG0000008	Sarc4_g18548T	10
OG0000008	Sarc4_g1349T	10
OG0000008	Sarc4_g2468T	10
OG0000008	Sarc4_g23106T	10
OG0000008	Sarc4_g28866T	10
OG0000008	Sarc4_g1872T	10
OG0000008	Sarc4_g28919T	10
OG0000008	Sarc4_g23611T	10
OG0000008	Sarc4_g26271T	10
OG0000008	Sarc4_g24240T	10
OG0000008	Sarc4_g2151T	10
OG0000008	Sarc4_g28920T	10
OG0000008	Sarc4_g31459T	10
OG0000008	Sarc4_g4790T	10
OG0000008	Sarc4_g4789T	10
OG0000008	Sarc4_g4463T	10
OG0000008	Sarc4_g31182T	10
OG0000008	Sarc4_g27616T	10
OG0000008	Sarc4_g24838T	10
OG0000008	Sarc4_g24267T	10
OG0000008	Sarc4_g31332T	10
OG0000008	Sarc4_g30802T	10
OG0000008	Sarc4_g31334T	10
OG0000008	Sarc4_g22943T	10
OG0000008	Sarc4_g10313T	10
OG0000008	Sarc4_g30129T	10
OG0000008	Sarc4_g16098T	10
OG0000008	Sarc4_g2785T	10
OG0000008	Sarc4_g32969T	10
OG0000008	Sarc4_g12316T	10
OG0000008	Sarc4_g14790T	10
OG0000008	Sarc4_g10656T	10
OG0000008	Sarc4_g10301T	10
OG0000008	Sarc4_g24273T	10
OG0000008	Sarc4_g11494T	10
OG0000008	Sarc4_g28966T	10
OG0000008	Sarc4_g17276T	10
OG0000008	Sarc4_g10088T	10
OG0000008	Sarc4_g2374T	10
OG0000008	Sarc4_g17796T	10
OG0000008	Sarc4_g21283T	10
OG0000008	Sarc4_g9905T	10
OG0000008	Sarc4_g33286T	10
OG0000008	Sarc4_g11495T	10
OG0000008	Sarc4_g31159T	10
OG0000008	Sarc4_g17462T	10
OG0000008	Sarc4_g1868T	10
OG0000008	Sarc4_g27808T	10
OG0000008	Sarc4_g24251T	10
OG0000008	Sarc4_g21431T	10
OG0000008	Sarc4_g30836T	10
OG0000008	Sarc4_g29119T	10
OG0000008	Sarc4_g10306T	10
OG0000008	Sarc4_g27668T	10
OG0000008	Sarc4_g22135T	10
OG0000008	Sarc4_g31331T	10
OG0000008	Sarc4_g4467T	10
OG0000008	Sarc4_g30128T	10
OG0000008	Sarc4_g21279T	10
OG0000008	Sarc4_g30821T	10
OG0000008	Sarc4_g4662T	10
OG0000008	Sarc4_g9560T	10
OG0000008	Sarc4_g4782T	10
OG0000008	Sarc4_g24269T	10
OG0000009	Sarc4_g25571T	10
OG0000009	Sarc4_g9263T	10
OG0000009	Sarc4_g20864T	10
OG0000009	Sarc4_g6205T	10
OG0000009	Sarc4_g7945T	10
OG0000009	Sarc4_g21333T	10
OG0000009	Sarc4_g33903T	10
OG0000009	Sarc4_g9896T_Sarc4_g9897T	10
OG0000009	Sarc4_g29390T	10
OG0000009	Sarc4_g8653T	10
OG0000009	Sarc4_g32240T	10
OG0000009	Sarc4_g19385T	10
OG0000009	Sarc4_g6438T	10
OG0000009	Sarc4_g15293T	10
OG0000009	Sarc4_g11891T	10
OG0000009	Sarc4_g30289T	10
OG0000009	Sarc4_g21336T	10
OG0000009	Sarc4_g29389T	10
OG0000009	Sarc4_g24977T	10
OG0000010	Sarc4_g20804T	10
OG0000010	Sarc4_g12339T	10
OG0000010	Sarc4_g2316T	10
OG0000010	Sarc4_g20447T	10
OG0000010	Sarc4_g19871T	10
OG0000010	Sarc4_g8086T	10
OG0000010	Sarc4_g3335T	10
OG0000010	Sarc4_g23T	10
OG0000010	Sarc4_g27835T	10
OG0000010	Sarc4_g5068T	10
OG0000010	Sarc4_g18600T	10
OG0000010	Sarc4_g16867T	10
OG0000010	Sarc4_g17767T	10
OG0000010	Sarc4_g6526T	10
OG0000010	Sarc4_g6256T	10
OG0000010	Sarc4_g24239T	10
OG0000011	Sarc4_g19583T	10
OG0000011	Sarc4_g19520T_Sarc4_g19522T	10
OG0000011	Sarc4_g24035T	10
OG0000011	Sarc4_g19510T	10
OG0000011	Sarc4_g23353T	10
OG0000011	Sarc4_g29388T	10
OG0000011	Sarc4_g11322T	10
OG0000011	Sarc4_g29381T	10
OG0000011	Sarc4_g15004T	10
OG0000011	Sarc4_g33813T	10
OG0000011	Sarc4_g2600T	10
OG0000011	Sarc4_g1201T	10
OG0000011	Sarc4_g2725T	10
OG0000011	Sarc4_g977T	10
OG0000011	Sarc4_g8966T	10
OG0000011	Sarc4_g29064T	10
OG0000012	Sarc4_g9104T	10
OG0000012	Sarc4_g28881T	10
OG0000012	Sarc4_g16693T	10
OG0000012	Sarc4_g10165T	10
OG0000012	Sarc4_g7683T	10
OG0000012	Sarc4_g7676T	10
OG0000012	Sarc4_g5582T	10
OG0000012	Sarc4_g9459T	10
OG0000012	Sarc4_g26064T	10
OG0000012	Sarc4_g6384T	10
OG0000012	Sarc4_g5584T	10
OG0000012	Sarc4_g11228T	10
OG0000012	Sarc4_g15515T	10
OG0000012	Sarc4_g17544T	10
OG0000013	Sarc4_g4946T	10
OG0000013	Sarc4_g24089T	10
OG0000013	Sarc4_g9554T	10
OG0000013	Sarc4_g22553T	10
OG0000013	Sarc4_g27035T	10
OG0000013	Sarc4_g10543T	10
OG0000013	Sarc4_g1701T	10
OG0000013	Sarc4_g23071T	10
OG0000013	Sarc4_g32768T	10
OG0000013	Sarc4_g940T	10
OG0000013	Sarc4_g7528T	10
OG0000013	Sarc4_g15477T	10
OG0000013	Sarc4_g9520T	10
OG0000013	Sarc4_g33764T	10
OG0000013	Sarc4_g22843T	10
OG0000013	Sarc4_g32350T	10
OG0000013	Sarc4_g31383T	10
OG0000014	Sarc4_g6204T	10
OG0000014	Sarc4_g29920T	10
OG0000014	Sarc4_g20040T	10
OG0000014	Sarc4_g13706T_Sarc4_g13707T	10
OG0000014	Sarc4_g22685T	10
OG0000014	Sarc4_g19677T	10
OG0000014	Sarc4_g21249T	10
OG0000014	Sarc4_g25878T	10
OG0000014	Sarc4_g10986T	10
OG0000014	Sarc4_g31471T	10
OG0000014	Sarc4_g17825T	10
OG0000014	Sarc4_g9743T	10
OG0000014	Sarc4_g1876T_Sarc4_g1877T	10
OG0000014	Sarc4_g6857T_Sarc4_g6858T	10
OG0000014	Sarc4_g19679T	10
OG0000014	Sarc4_g8873T	10
OG0000015	Sarc4_g25704T	10
OG0000015	Sarc4_g22034T	10
OG0000015	Sarc4_g31652T	10
OG0000015	Sarc4_g30829T	10
OG0000015	Sarc4_g9344T	10
OG0000015	Sarc4_g12777T	10
OG0000015	Sarc4_g27768T	10
OG0000015	Sarc4_g11655T	10
OG0000015	Sarc4_g22014T	10
OG0000015	Sarc4_g25328T	10
OG0000015	Sarc4_g990T	10
OG0000015	Sarc4_g16195T	10
OG0000015	Sarc4_g1795T	10
OG0000015	Sarc4_g26558T	10
OG0000015	Sarc4_g31976T	10
OG0000015	Sarc4_g22415T	10
OG0000015	Sarc4_g16568T	10
OG0000016	Sarc4_g33434T	10
OG0000016	Sarc4_g11261T	10
OG0000016	Sarc4_g8405T	10
OG0000016	Sarc4_g26350T	10
OG0000016	Sarc4_g26311T	10
OG0000016	Sarc4_g29401T	10
OG0000016	Sarc4_g20002T	10
OG0000016	Sarc4_g1533T	10
OG0000016	Sarc4_g7933T	10
OG0000016	Sarc4_g18580T	10
OG0000016	Sarc4_g20288T_Sarc4_g20289T	10
OG0000016	Sarc4_g33435T	10
OG0000016	Sarc4_g25078T	10
OG0000017	Sarc4_g1364T	10
OG0000017	Sarc4_g30973T	10
OG0000017	Sarc4_g9634T	10
OG0000017	Sarc4_g11901T_Sarc4_g11902T_Sarc4_g11903T_Sarc4_g11904T	10
OG0000017	Sarc4_g21557T	10
OG0000017	Sarc4_g7502T	10
OG0000017	Sarc4_g665T	10
OG0000017	Sarc4_g4272T_Sarc4_g4275T	10
OG0000017	Sarc4_g33444T_Sarc4_g33445T	10
OG0000018	Sarc4_g4672T	10
OG0000018	Sarc4_g7163T	10
OG0000018	Sarc4_g23119T	10
OG0000018	Sarc4_g29433T	10
OG0000018	Sarc4_g32406T	10
OG0000018	Sarc4_g25582T	10
OG0000018	Sarc4_g1049T	10
OG0000018	Sarc4_g29299T	10
OG0000018	Sarc4_g12960T	10
OG0000018	Sarc4_g26084T	10
OG0000018	Sarc4_g19296T	10
OG0000018	Sarc4_g24777T	10
OG0000018	Sarc4_g30299T	10
OG0000018	Sarc4_g29301T	10
OG0000018	Sarc4_g3715T	10
OG0000018	Sarc4_g24722T_Sarc4_g24723T	10
OG0000018	Sarc4_g712T	10
OG0000019	Sarc4_g16955T	10
OG0000019	Sarc4_g30089T	10
OG0000019	Sarc4_g4080T	10
OG0000020	Sarc4_g8346T	10
OG0000020	Sarc4_g31877T	10
OG0000020	Sarc4_g24023T	10
OG0000020	Sarc4_g32431T	10
OG0000020	Sarc4_g19905T	10
OG0000020	Sarc4_g6364T	10
OG0000020	Sarc4_g11716T	10
OG0000020	Sarc4_g3373T	10
OG0000020	Sarc4_g4833T_Sarc4_g4834T	10
OG0000020	Sarc4_g19858T	10
OG0000022	Sarc4_g33550T	10
OG0000022	Sarc4_g26930T	10
OG0000022	Sarc4_g2381T	10
OG0000022	Sarc4_g10058T	10
OG0000022	Sarc4_g19130T	10
OG0000022	Sarc4_g5154T	10
OG0000022	Sarc4_g23178T	10
OG0000022	Sarc4_g26609T	10
OG0000022	Sarc4_g23249T	10
OG0000022	Sarc4_g11646T	10
OG0000022	Sarc4_g18654T	10
OG0000022	Sarc4_g7495T	10
OG0000022	Sarc4_g20027T	10
OG0000022	Sarc4_g31129T	10
OG0000022	Sarc4_g28403T	10
OG0000023	Sarc4_g14562T	10
OG0000023	Sarc4_g27545T	10
OG0000023	Sarc4_g2790T	10
OG0000023	Sarc4_g33312T	10
OG0000023	Sarc4_g7997T	10
OG0000023	Sarc4_g18106T	10
OG0000023	Sarc4_g33313T	10
OG0000023	Sarc4_g31577T	10
OG0000023	Sarc4_g4820T	10
OG0000023	Sarc4_g962T	10
OG0000023	Sarc4_g29025T	10
OG0000023	Sarc4_g8024T	10
OG0000023	Sarc4_g453T	10
OG0000023	Sarc4_g9141T	10
OG0000023	Sarc4_g5232T	10
OG0000023	Sarc4_g5233T	10
OG0000024	Sarc4_g26147T	10
OG0000024	Sarc4_g18552T	10
OG0000024	Sarc4_g23031T	10
OG0000024	Sarc4_g717T	10
OG0000024	Sarc4_g18049T	10
OG0000024	Sarc4_g9144T	10
OG0000024	Sarc4_g3019T	10
OG0000025	Sarc4_g9290T	10
OG0000025	Sarc4_g29606T	10
OG0000025	Sarc4_g28839T	10
OG0000025	Sarc4_g24003T	10
OG0000025	Sarc4_g33253T	10
OG0000025	Sarc4_g33722T	10
OG0000025	Sarc4_g4161T	10
OG0000025	Sarc4_g26286T	10
OG0000027	Sarc4_g13329T	10
OG0000027	Sarc4_g33666T	10
OG0000027	Sarc4_g21680T	10
OG0000027	Sarc4_g21672T	10
OG0000027	Sarc4_g27566T	10
OG0000027	Sarc4_g21681T	10
OG0000027	Sarc4_g18902T	10
OG0000027	Sarc4_g30247T	10
OG0000027	Sarc4_g30629T	10
OG0000027	Sarc4_g28322T	10
OG0000027	Sarc4_g28712T	10
OG0000027	Sarc4_g7315T	10
OG0000027	Sarc4_g7369T	10
OG0000027	Sarc4_g7317T	10
OG0000027	Sarc4_g13322T	10
OG0000027	Sarc4_g13725T	10
OG0000028	Sarc4_g32473T	10
OG0000028	Sarc4_g24725T	10
OG0000028	Sarc4_g9280T	10
OG0000028	Sarc4_g1471T	10
OG0000028	Sarc4_g28284T	10
OG0000028	Sarc4_g6992T	10
OG0000028	Sarc4_g9236T	10
OG0000028	Sarc4_g33216T	10
OG0000028	Sarc4_g4145T	10
OG0000028	Sarc4_g15347T	10
OG0000028	Sarc4_g23535T	10
OG0000029	Sarc4_g28508T	10
OG0000029	Sarc4_g5450T	10
OG0000029	Sarc4_g9938T	10
OG0000029	Sarc4_g9355T	10
OG0000030	Sarc4_g20557T	10
OG0000030	Sarc4_g25016T	10
OG0000030	Sarc4_g25018T	10
OG0000030	Sarc4_g2824T	10
OG0000031	Sarc4_g29043T	10
OG0000031	Sarc4_g13387T	10
OG0000031	Sarc4_g8127T	10
OG0000031	Sarc4_g3289T	10
OG0000031	Sarc4_g2253T_Sarc4_g2254T	10
OG0000031	Sarc4_g23768T	10
OG0000032	Sarc4_g28442T	10
OG0000032	Sarc4_g29934T	10
OG0000032	Sarc4_g29464T	10
OG0000033	Sarc4_g8164T	10
OG0000033	Sarc4_g23190T	10
OG0000033	Sarc4_g24085T	10
OG0000033	Sarc4_g11216T	10
OG0000033	Sarc4_g22307T_Sarc4_g22308T	10
OG0000033	Sarc4_g25874T	10
OG0000033	Sarc4_g3526T	10
OG0000033	Sarc4_g27211T	10
OG0000033	Sarc4_g33717T	10
OG0000034	Sarc4_g3253T	10
OG0000034	Sarc4_g7057T	10
OG0000034	Sarc4_g7058T	10
OG0000034	Sarc4_g11705T	10
OG0000034	Sarc4_g5765T	10
OG0000034	Sarc4_g8176T	10
OG0000034	Sarc4_g19127T	10
OG0000034	Sarc4_g31205T	10
OG0000034	Sarc4_g16087T	10
OG0000035	Sarc4_g13821T	10
OG0000035	Sarc4_g24462T	10
OG0000035	Sarc4_g14843T	10
OG0000035	Sarc4_g9051T	10
OG0000035	Sarc4_g31552T	10
OG0000035	Sarc4_g20947T	10
OG0000035	Sarc4_g18879T	10
OG0000035	Sarc4_g24198T	10
OG0000036	Sarc4_g23869T	10
OG0000036	Sarc4_g19623T	10
OG0000036	Sarc4_g33351T	10
OG0000036	Sarc4_g17606T	10
OG0000036	Sarc4_g5206T	10
OG0000036	Sarc4_g5299T	10
OG0000036	Sarc4_g7479T	10
OG0000036	Sarc4_g20790T	10
OG0000036	Sarc4_g7478T	10
OG0000036	Sarc4_g24481T	10
OG0000036	Sarc4_g27639T	10
OG0000036	Sarc4_g24503T	10
OG0000037	Sarc4_g23209T	10
OG0000037	Sarc4_g19189T	10
OG0000037	Sarc4_g6293T	10
OG0000038	Sarc4_g29343T	10
OG0000038	Sarc4_g25831T	10
OG0000038	Sarc4_g16673T	10
OG0000038	Sarc4_g19993T	10
OG0000038	Sarc4_g796T	10
OG0000038	Sarc4_g2275T	10
OG0000039	Sarc4_g22888T	10
OG0000039	Sarc4_g3828T	10
OG0000039	Sarc4_g18969T	10
OG0000039	Sarc4_g21316T	10
OG0000039	Sarc4_g14489T	10
OG0000039	Sarc4_g27643T	10
OG0000039	Sarc4_g11465T	10
OG0000039	Sarc4_g5186T	10
OG0000040	Sarc4_g11802T	10
OG0000040	Sarc4_g16933T	10
OG0000040	Sarc4_g10465T	10
OG0000041	Sarc4_g31835T	10
OG0000041	Sarc4_g11690T	10
OG0000041	Sarc4_g16403T	10
OG0000041	Sarc4_g28924T	10
OG0000041	Sarc4_g11469T	10
OG0000041	Sarc4_g20222T	10
OG0000041	Sarc4_g2710T	10
OG0000041	Sarc4_g28324T	10
OG0000041	Sarc4_g26275T	10
OG0000041	Sarc4_g32282T	10
OG0000042	Sarc4_g4167T_Sarc4_g4168T	10
OG0000042	Sarc4_g28302T	10
OG0000042	Sarc4_g25983T	10
OG0000042	Sarc4_g19743T	10
OG0000042	Sarc4_g3266T_Sarc4_g3267T	10
OG0000042	Sarc4_g9361T	10
OG0000042	Sarc4_g16435T	10
OG0000042	Sarc4_g15050T	10
OG0000042	Sarc4_g2328T	10
OG0000042	Sarc4_g29786T	10
OG0000043	Sarc4_g33750T	10
OG0000043	Sarc4_g11812T	10
OG0000044	Sarc4_g15341T	10
OG0000044	Sarc4_g7915T	10
OG0000044	Sarc4_g23536T	10
OG0000044	Sarc4_g4468T	10
OG0000044	Sarc4_g11922T	10
OG0000044	Sarc4_g19004T	10
OG0000044	Sarc4_g22979T	10
OG0000044	Sarc4_g225T	10
OG0000044	Sarc4_g30055T	10
OG0000045	Sarc4_g22283T	10
OG0000045	Sarc4_g7246T	10
OG0000045	Sarc4_g22628T	10
OG0000045	Sarc4_g29834T	10
OG0000045	Sarc4_g12899T	10
OG0000045	Sarc4_g19040T	10
OG0000045	Sarc4_g7883T	10
OG0000045	Sarc4_g7253T	10
OG0000046	Sarc4_g19384T	10
OG0000046	Sarc4_g6991T	10
OG0000047	Sarc4_g12266T	10
OG0000047	Sarc4_g32970T	10
OG0000048	Sarc4_g27173T	10
OG0000048	Sarc4_g7587T	10
OG0000048	Sarc4_g10737T	10
OG0000048	Sarc4_g11113T	10
OG0000048	Sarc4_g27177T	10
OG0000048	Sarc4_g1610T	10
OG0000048	Sarc4_g10738T	10
OG0000048	Sarc4_g15078T	10
OG0000049	Sarc4_g14030T	10
OG0000049	Sarc4_g24700T	10
OG0000049	Sarc4_g14584T	10
OG0000049	Sarc4_g1337T	10
OG0000049	Sarc4_g22285T	10
OG0000049	Sarc4_g23166T	10
OG0000049	Sarc4_g183T	10
OG0000049	Sarc4_g30520T	10
OG0000049	Sarc4_g9075T	10
OG0000049	Sarc4_g9294T	10
OG0000051	Sarc4_g12581T	10
OG0000051	Sarc4_g24978T	10
OG0000051	Sarc4_g18696T	10
OG0000051	Sarc4_g12449T	10
OG0000051	Sarc4_g12582T	10
OG0000051	Sarc4_g18477T	10
OG0000051	Sarc4_g29420T	10
OG0000051	Sarc4_g13118T	10
OG0000051	Sarc4_g21345T	10
OG0000051	Sarc4_g7032T	10
OG0000051	Sarc4_g7031T	10
OG0000052	Sarc4_g24098T	10
OG0000052	Sarc4_g12945T	10
OG0000052	Sarc4_g21597T	10
OG0000052	Sarc4_g7725T	10
OG0000052	Sarc4_g4123T	10
OG0000052	Sarc4_g26748T	10
OG0000052	Sarc4_g6400T	10
OG0000052	Sarc4_g20025T	10
OG0000052	Sarc4_g20070T_Sarc4_g20071T	10
OG0000052	Sarc4_g10966T	10
OG0000052	Sarc4_g6652T	10
OG0000052	Sarc4_g12010T	10
OG0000052	Sarc4_g26284T	10
OG0000052	Sarc4_g13294T	10
OG0000052	Sarc4_g5801T	10
OG0000053	Sarc4_g33710T	10
OG0000053	Sarc4_g33711T	10
OG0000055	Sarc4_g2938T	10
OG0000055	Sarc4_g16023T	10
OG0000055	Sarc4_g20792T	10
OG0000055	Sarc4_g32284T	10
OG0000056	Sarc4_g8229T	10
OG0000056	Sarc4_g32729T	10
OG0000056	Sarc4_g26234T_Sarc4_g26235T	10
OG0000056	Sarc4_g26707T	10
OG0000056	Sarc4_g18997T	10
OG0000056	Sarc4_g11600T	10
OG0000058	Sarc4_g30943T	10
OG0000058	Sarc4_g29518T	10
OG0000058	Sarc4_g4597T	10
OG0000058	Sarc4_g26750T	10
OG0000058	Sarc4_g5419T	10
OG0000058	Sarc4_g11673T	10
OG0000058	Sarc4_g10555T	10
OG0000058	Sarc4_g28141T	10
OG0000059	Sarc4_g9100T	10
OG0000059	Sarc4_g20037T_Sarc4_g20038T	10
OG0000059	Sarc4_g22479T	10
OG0000060	Sarc4_g15086T	10
OG0000060	Sarc4_g26231T	10
OG0000060	Sarc4_g31986T	10
OG0000060	Sarc4_g33966T	10
OG0000060	Sarc4_g5079T	10
OG0000060	Sarc4_g23020T	10
OG0000060	Sarc4_g12209T	10
OG0000061	Sarc4_g31261T	10
OG0000061	Sarc4_g30855T	10
OG0000061	Sarc4_g28846T	10
OG0000061	Sarc4_g8916T	10
OG0000061	Sarc4_g31586T	10
OG0000061	Sarc4_g6613T	10
OG0000061	Sarc4_g27621T	10
OG0000061	Sarc4_g8770T	10
OG0000061	Sarc4_g3687T	10
OG0000061	Sarc4_g27506T	10
OG0000061	Sarc4_g33842T	10
OG0000061	Sarc4_g24599T	10
OG0000061	Sarc4_g7389T	10
OG0000061	Sarc4_g32936T	10
OG0000061	Sarc4_g28380T	10
OG0000061	Sarc4_g3747T	10
OG0000061	Sarc4_g18262T	10
OG0000061	Sarc4_g25233T	10
OG0000061	Sarc4_g29994T	10
OG0000061	Sarc4_g12137T	10
OG0000061	Sarc4_g32369T	10
OG0000061	Sarc4_g31361T	10
OG0000061	Sarc4_g22806T	10
OG0000061	Sarc4_g32792T	10
OG0000061	Sarc4_g2311T	10
OG0000061	Sarc4_g30910T	10
OG0000061	Sarc4_g25821T	10
OG0000061	Sarc4_g32788T	10
OG0000061	Sarc4_g26630T	10
OG0000061	Sarc4_g29889T	10
OG0000061	Sarc4_g4554T	10
OG0000061	Sarc4_g30854T	10
OG0000061	Sarc4_g31897T	10
OG0000061	Sarc4_g11865T	10
OG0000061	Sarc4_g23061T	10
OG0000061	Sarc4_g10468T	10
OG0000061	Sarc4_g31016T	10
OG0000061	Sarc4_g26510T	10
OG0000061	Sarc4_g8868T	10
OG0000061	Sarc4_g28828T	10
OG0000061	Sarc4_g32943T	10
OG0000061	Sarc4_g26774T	10
OG0000061	Sarc4_g7699T	10
OG0000061	Sarc4_g23557T	10
OG0000061	Sarc4_g23090T	10
OG0000061	Sarc4_g16077T	10
OG0000061	Sarc4_g18268T	10
OG0000061	Sarc4_g8108T	10
OG0000061	Sarc4_g8215T	10
OG0000061	Sarc4_g24551T	10
OG0000061	Sarc4_g13227T	10
OG0000061	Sarc4_g32420T	10
OG0000061	Sarc4_g3748T	10
OG0000061	Sarc4_g33745T	10
OG0000061	Sarc4_g23134T	10
OG0000061	Sarc4_g14755T	10
OG0000061	Sarc4_g13214T	10
OG0000061	Sarc4_g20845T	10
OG0000061	Sarc4_g13802T	10
OG0000061	Sarc4_g24433T	10
OG0000061	Sarc4_g12044T	10
OG0000061	Sarc4_g30177T	10
OG0000061	Sarc4_g26487T	10
OG0000061	Sarc4_g2412T	10
OG0000061	Sarc4_g3966T	10
OG0000061	Sarc4_g31514T	10
OG0000061	Sarc4_g27945T	10
OG0000061	Sarc4_g4409T	10
OG0000061	Sarc4_g651T	10
OG0000061	Sarc4_g29803T	10
OG0000061	Sarc4_g30602T	10
OG0000061	Sarc4_g32791T	10
OG0000061	Sarc4_g33467T	10
OG0000061	Sarc4_g11869T	10
OG0000061	Sarc4_g26454T	10
OG0000061	Sarc4_g32801T	10
OG0000061	Sarc4_g1950T	10
OG0000061	Sarc4_g28580T	10
OG0000061	Sarc4_g31476T	10
OG0000061	Sarc4_g23494T	10
OG0000061	Sarc4_g13108T	10
OG0000061	Sarc4_g11380T	10
OG0000061	Sarc4_g7573T	10
OG0000061	Sarc4_g22436T	10
OG0000061	Sarc4_g25861T	10
OG0000061	Sarc4_g3502T	10
OG0000061	Sarc4_g6927T	10
OG0000061	Sarc4_g13395T	10
OG0000061	Sarc4_g25317T	10
OG0000061	Sarc4_g22934T	10
OG0000061	Sarc4_g26770T	10
OG0000061	Sarc4_g926T	10
OG0000061	Sarc4_g24834T	10
OG0000061	Sarc4_g30578T	10
OG0000061	Sarc4_g11759T	10
OG0000061	Sarc4_g21420T	10
OG0000061	Sarc4_g23272T	10
OG0000061	Sarc4_g22712T	10
OG0000061	Sarc4_g30733T	10
OG0000061	Sarc4_g26106T	10
OG0000061	Sarc4_g26734T	10
OG0000061	Sarc4_g7955T	10
OG0000061	Sarc4_g14625T	10
OG0000061	Sarc4_g9444T	10
OG0000061	Sarc4_g33468T	10
OG0000061	Sarc4_g18775T	10
OG0000061	Sarc4_g1896T	10
OG0000061	Sarc4_g29801T	10
OG0000061	Sarc4_g13206T	10
OG0000061	Sarc4_g6326T	10
OG0000061	Sarc4_g7785T	10
OG0000061	Sarc4_g23128T	10
OG0000061	Sarc4_g27083T	10
OG0000061	Sarc4_g27501T	10
OG0000061	Sarc4_g29313T	10
OG0000061	Sarc4_g12170T	10
OG0000061	Sarc4_g23281T	10
OG0000061	Sarc4_g6155T	10
OG0000061	Sarc4_g18931T	10
OG0000061	Sarc4_g15207T	10
OG0000061	Sarc4_g24170T	10
OG0000061	Sarc4_g571T	10
OG0000061	Sarc4_g29412T	10
OG0000061	Sarc4_g11335T	10
OG0000061	Sarc4_g5889T	10
OG0000061	Sarc4_g12244T	10
OG0000061	Sarc4_g28997T	10
OG0000063	Sarc4_g25803T	10
OG0000063	Sarc4_g2289T	10
OG0000063	Sarc4_g6148T_Sarc4_g6150T	10
OG0000063	Sarc4_g23406T	10
OG0000063	Sarc4_g25451T	10
OG0000065	Sarc4_g4739T	10
OG0000065	Sarc4_g6478T	10
OG0000065	Sarc4_g22413T	10
OG0000065	Sarc4_g2796T	10
OG0000065	Sarc4_g22582T	10
OG0000065	Sarc4_g22997T	10
OG0000066	Sarc4_g5839T	10
OG0000066	Sarc4_g32829T	10
OG0000066	Sarc4_g29101T	10
OG0000066	Sarc4_g28650T	10
OG0000067	Sarc4_g6499T	10
OG0000067	Sarc4_g23392T	10
OG0000067	Sarc4_g1883T	10
OG0000067	Sarc4_g9621T	10
OG0000067	Sarc4_g32474T	10
OG0000067	Sarc4_g7912T	10
OG0000067	Sarc4_g25019T	10
OG0000068	Sarc4_g9594T	10
OG0000068	Sarc4_g23691T_Sarc4_g23693T	10
OG0000068	Sarc4_g33662T	10
OG0000068	Sarc4_g30140T	10
OG0000068	Sarc4_g30016T	10
OG0000068	Sarc4_g31219T	10
OG0000070	Sarc4_g163T	10
OG0000070	Sarc4_g28269T	10
OG0000071	Sarc4_g29400T	10
OG0000071	Sarc4_g30281T	10
OG0000071	Sarc4_g26601T	10
OG0000071	Sarc4_g1051T	10
OG0000071	Sarc4_g23089T	10
OG0000071	Sarc4_g19681T	10
OG0000071	Sarc4_g33800T	10
OG0000071	Sarc4_g5371T	10
OG0000071	Sarc4_g30613T	10
OG0000072	Sarc4_g11158T	10
OG0000074	Sarc4_g3476T	10
OG0000074	Sarc4_g31225T	10
OG0000074	Sarc4_g31972T	10
OG0000074	Sarc4_g8020T	10
OG0000074	Sarc4_g1169T	10
OG0000074	Sarc4_g4007T	10
OG0000074	Sarc4_g21971T	10
OG0000074	Sarc4_g4923T	10
OG0000075	Sarc4_g22121T	10
OG0000075	Sarc4_g13480T	10
OG0000075	Sarc4_g13588T	10
OG0000075	Sarc4_g22119T	10
OG0000075	Sarc4_g13479T	10
OG0000075	Sarc4_g20715T	10
OG0000076	Sarc4_g18433T	10
OG0000076	Sarc4_g938T	10
OG0000076	Sarc4_g26932T	10
OG0000076	Sarc4_g7661T	10
OG0000076	Sarc4_g23074T	10
OG0000076	Sarc4_g32231T	10
OG0000076	Sarc4_g30993T	10
OG0000076	Sarc4_g32545T	10
OG0000076	Sarc4_g32590T	10
OG0000076	Sarc4_g26931T	10
OG0000076	Sarc4_g11112T	10
OG0000076	Sarc4_g19180T	10
OG0000077	Sarc4_g12133T	10
OG0000077	Sarc4_g6618T_Sarc4_g6619T	10
OG0000077	Sarc4_g4862T	10
OG0000077	Sarc4_g22570T	10
OG0000077	Sarc4_g21592T	10
OG0000078	Sarc4_g22908T	10
OG0000078	Sarc4_g5059T	10
OG0000078	Sarc4_g2698T	10
OG0000079	Sarc4_g2320T	10
OG0000079	Sarc4_g10721T	10
OG0000079	Sarc4_g32274T	10
OG0000079	Sarc4_g19862T	10
OG0000079	Sarc4_g4702T	10
OG0000080	Sarc4_g4676T	10
OG0000080	Sarc4_g28758T	10
OG0000080	Sarc4_g9296T	10
OG0000080	Sarc4_g25875T	10
OG0000080	Sarc4_g30745T	10
OG0000080	Sarc4_g27927T	10
OG0000080	Sarc4_g13891T	10
OG0000081	Sarc4_g25082T	10
OG0000082	Sarc4_g2574T	10
OG0000082	Sarc4_g31588T	10
OG0000082	Sarc4_g2646T	10
OG0000082	Sarc4_g15067T	10
OG0000082	Sarc4_g2658T	10
OG0000083	Sarc4_g23165T	10
OG0000083	Sarc4_g24506T	10
OG0000083	Sarc4_g17242T	10
OG0000083	Sarc4_g25709T	10
OG0000083	Sarc4_g22385T	10
OG0000084	Sarc4_g3807T	10
OG0000084	Sarc4_g19286T	10
OG0000085	Sarc4_g27207T	10
OG0000085	Sarc4_g19625T	10
OG0000085	Sarc4_g7341T	10
OG0000085	Sarc4_g28734T	10
OG0000085	Sarc4_g28733T	10
OG0000085	Sarc4_g4329T	10
OG0000086	Sarc4_g7659T	10
OG0000086	Sarc4_g12277T	10
OG0000086	Sarc4_g33078T	10
OG0000086	Sarc4_g7998T	10
OG0000087	Sarc4_g24463T	9
OG0000087	Sarc4_g11295T	9
OG0000087	Sarc4_g5953T	9
OG0000087	Sarc4_g11667T	9
OG0000087	Sarc4_g24143T	9
OG0000087	Sarc4_g943T	9
OG0000087	Sarc4_g18948T	9
OG0000087	Sarc4_g4742T	9
OG0000087	Sarc4_g12286T	9
OG0000087	Sarc4_g12472T	9
OG0000087	Sarc4_g7653T	9
OG0000087	Sarc4_g30832T	9
OG0000087	Sarc4_g14583T	9
OG0000087	Sarc4_g21401T	9
OG0000088	Sarc4_g10943T	10
OG0000088	Sarc4_g12378T	10
OG0000088	Sarc4_g12729T	10
OG0000088	Sarc4_g26781T	10
OG0000088	Sarc4_g8196T	10
OG0000088	Sarc4_g18634T	10
OG0000089	Sarc4_g12452T	10
OG0000089	Sarc4_g24536T	10
OG0000089	Sarc4_g27867T	10
OG0000089	Sarc4_g23121T	10
OG0000089	Sarc4_g7517T	10
OG0000089	Sarc4_g32882T	10
OG0000090	Sarc4_g19622T	10
OG0000090	Sarc4_g23429T	10
OG0000090	Sarc4_g13967T	10
OG0000090	Sarc4_g10872T	10
OG0000091	Sarc4_g12991T	10
OG0000091	Sarc4_g5252T	10
OG0000091	Sarc4_g12868T	10
OG0000091	Sarc4_g21008T	10
OG0000091	Sarc4_g15332T	10
OG0000091	Sarc4_g16961T	10
OG0000091	Sarc4_g21321T	10
OG0000091	Sarc4_g11960T	10
OG0000091	Sarc4_g20180T	10
OG0000091	Sarc4_g20776T	10
OG0000091	Sarc4_g16580T	10
OG0000091	Sarc4_g26646T	10
OG0000091	Sarc4_g14661T	10
OG0000091	Sarc4_g9810T	10
OG0000091	Sarc4_g15558T	10
OG0000091	Sarc4_g17099T	10
OG0000091	Sarc4_g14830T	10
OG0000092	Sarc4_g25464T	10
OG0000092	Sarc4_g28729T	10
OG0000092	Sarc4_g19864T	10
OG0000092	Sarc4_g22454T	10
OG0000092	Sarc4_g32239T	10
OG0000094	Sarc4_g22740T	10
OG0000094	Sarc4_g3519T	10
OG0000094	Sarc4_g1274T	10
OG0000094	Sarc4_g6144T	10
OG0000095	Sarc4_g43T	10
OG0000095	Sarc4_g7323T	10
OG0000095	Sarc4_g11504T	10
OG0000095	Sarc4_g5924T	10
OG0000095	Sarc4_g11590T	10
OG0000095	Sarc4_g25173T	10
OG0000096	Sarc4_g7319T	10
OG0000096	Sarc4_g31416T	10
OG0000096	Sarc4_g3959T	10
OG0000096	Sarc4_g15368T	10
OG0000097	Sarc4_g32249T	10
OG0000097	Sarc4_g26904T	10
OG0000097	Sarc4_g26567T_Sarc4_g26568T	10
OG0000097	Sarc4_g10735T	10
OG0000097	Sarc4_g2660T	10
OG0000097	Sarc4_g27887T	10
OG0000099	Sarc4_g20059T	10
OG0000099	Sarc4_g15358T	10
OG0000099	Sarc4_g15363T	10
OG0000100	Sarc4_g25508T	10
OG0000100	Sarc4_g11288T	10
OG0000100	Sarc4_g30968T	10
OG0000100	Sarc4_g3520T	10
OG0000100	Sarc4_g31102T	10
OG0000100	Sarc4_g25686T	10
OG0000100	Sarc4_g27022T	10
OG0000100	Sarc4_g30967T	10
OG0000100	Sarc4_g25097T	10
OG0000100	Sarc4_g10114T	10
OG0000100	Sarc4_g25456T	10
OG0000100	Sarc4_g7494T	10
OG0000100	Sarc4_g11503T	10
OG0000101	Sarc4_g28002T	10
OG0000101	Sarc4_g7799T	10
OG0000101	Sarc4_g12531T	10
OG0000101	Sarc4_g23576T	10
OG0000101	Sarc4_g4824T	10
OG0000101	Sarc4_g11943T	10
OG0000102	Sarc4_g21399T	10
OG0000102	Sarc4_g11809T	10
OG0000102	Sarc4_g7726T	10
OG0000102	Sarc4_g13351T_Sarc4_g13352T	10
OG0000103	Sarc4_g2025T	10
OG0000103	Sarc4_g22115T	10
OG0000103	Sarc4_g25263T	10
OG0000103	Sarc4_g31654T	10
OG0000103	Sarc4_g13258T	10
OG0000103	Sarc4_g22748T	10
OG0000104	Sarc4_g21488T	10
OG0000104	Sarc4_g2169T	10
OG0000104	Sarc4_g4394T	10
OG0000104	Sarc4_g179T	10
OG0000104	Sarc4_g2795T	10
OG0000104	Sarc4_g25414T	10
OG0000105	Sarc4_g27370T	10
OG0000105	Sarc4_g21963T	10
OG0000105	Sarc4_g12068T	10
OG0000105	Sarc4_g13985T	10
OG0000105	Sarc4_g21964T	10
OG0000105	Sarc4_g31554T	10
OG0000105	Sarc4_g6988T	10
OG0000106	Sarc4_g4572T	10
OG0000106	Sarc4_g12096T	10
OG0000106	Sarc4_g11015T	10
OG0000106	Sarc4_g28165T	10
OG0000106	Sarc4_g14483T	10
OG0000107	Sarc4_g19327T	10
OG0000107	Sarc4_g32546T	10
OG0000107	Sarc4_g9175T	10
OG0000107	Sarc4_g3313T	10
OG0000107	Sarc4_g28598T	10
OG0000107	Sarc4_g9835T	10
OG0000108	Sarc4_g16741T	10
OG0000108	Sarc4_g6318T	10
OG0000108	Sarc4_g25792T	10
OG0000108	Sarc4_g23174T	10
OG0000108	Sarc4_g5247T	10
OG0000109	Sarc4_g9383T	10
OG0000109	Sarc4_g7205T	10
OG0000109	Sarc4_g4199T	10
OG0000109	Sarc4_g30969T	10
OG0000109	Sarc4_g3477T	10
OG0000110	Sarc4_g11990T	10
OG0000110	Sarc4_g33271T	10
OG0000110	Sarc4_g11992T	10
OG0000111	Sarc4_g6140T	10
OG0000111	Sarc4_g11950T	10
OG0000111	Sarc4_g25798T	10
OG0000111	Sarc4_g517T	10
OG0000111	Sarc4_g12422T	10
OG0000111	Sarc4_g11919T	10
OG0000112	Sarc4_g8276T	10
OG0000112	Sarc4_g24174T	10
OG0000112	Sarc4_g27617T	10
OG0000112	Sarc4_g14702T	10
OG0000112	Sarc4_g14516T	10
OG0000112	Sarc4_g5454T	10
OG0000112	Sarc4_g11783T	10
OG0000112	Sarc4_g29576T	10
OG0000112	Sarc4_g6951T	10
OG0000112	Sarc4_g14515T	10
OG0000112	Sarc4_g11778T	10
OG0000112	Sarc4_g29578T	10
OG0000112	Sarc4_g22095T	10
OG0000112	Sarc4_g13746T	10
OG0000112	Sarc4_g29575T	10
OG0000112	Sarc4_g19452T	10
OG0000113	Sarc4_g3009T	10
OG0000113	Sarc4_g3010T	10
OG0000113	Sarc4_g2644T	10
OG0000114	Sarc4_g11684T	10
OG0000114	Sarc4_g15087T	10
OG0000115	Sarc4_g28013T	10
OG0000115	Sarc4_g9231T	10
OG0000115	Sarc4_g23081T	10
OG0000115	Sarc4_g13501T	10
OG0000115	Sarc4_g24755T	10
OG0000116	Sarc4_g2496T	10
OG0000116	Sarc4_g18310T	10
OG0000116	Sarc4_g6406T	10
OG0000116	Sarc4_g24425T	10
OG0000116	Sarc4_g5575T	10
OG0000116	Sarc4_g11049T	10
OG0000116	Sarc4_g6408T	10
OG0000116	Sarc4_g18312T	10
OG0000116	Sarc4_g6410T	10
OG0000116	Sarc4_g6407T_Sarc4_g6409T	10
OG0000116	Sarc4_g21591T	10
OG0000116	Sarc4_g11916T	10
OG0000116	Sarc4_g33404T	10
OG0000116	Sarc4_g6412T	10
OG0000116	Sarc4_g6411T	10
OG0000118	Sarc4_g30198T	10
OG0000118	Sarc4_g23605T	10
OG0000118	Sarc4_g31975T	10
OG0000118	Sarc4_g10366T	10
OG0000118	Sarc4_g13099T	10
OG0000119	Sarc4_g26994T	10
OG0000119	Sarc4_g12764T	10
OG0000120	Sarc4_g3468T	10
OG0000120	Sarc4_g25201T	10
OG0000120	Sarc4_g4850T	10
OG0000121	Sarc4_g31045T	10
OG0000121	Sarc4_g3580T	10
OG0000121	Sarc4_g4074T	10
OG0000122	Sarc4_g19863T	10
OG0000122	Sarc4_g33277T	10
OG0000123	Sarc4_g33665T	10
OG0000123	Sarc4_g2400T	10
OG0000124	Sarc4_g22857T	10
OG0000124	Sarc4_g29469T	10
OG0000124	Sarc4_g2188T	10
OG0000125	Sarc4_g1736T	10
OG0000125	Sarc4_g5177T	10
OG0000125	Sarc4_g15127T	10
OG0000125	Sarc4_g12233T	10
OG0000125	Sarc4_g5176T	10
OG0000125	Sarc4_g17145T	10
OG0000126	Sarc4_g6653T	10
OG0000126	Sarc4_g4174T	10
OG0000126	Sarc4_g30306T	10
OG0000126	Sarc4_g33113T	10
OG0000127	Sarc4_g5328T	10
OG0000127	Sarc4_g21856T	10
OG0000127	Sarc4_g28347T	10
OG0000127	Sarc4_g9222T_Sarc4_g9223T	10
OG0000127	Sarc4_g18097T	10
OG0000128	Sarc4_g28681T	10
OG0000128	Sarc4_g6310T_Sarc4_g6311T	10
OG0000128	Sarc4_g32202T	10
OG0000128	Sarc4_g25581T	10
OG0000128	Sarc4_g19174T	10
OG0000128	Sarc4_g3926T	10
OG0000128	Sarc4_g11680T	10
OG0000128	Sarc4_g8924T	10
OG0000128	Sarc4_g4813T	10
OG0000128	Sarc4_g7174T	10
OG0000128	Sarc4_g19263T	10
OG0000128	Sarc4_g26380T	10
OG0000129	Sarc4_g13546T	10
OG0000129	Sarc4_g10849T	10
OG0000129	Sarc4_g20291T	10
OG0000129	Sarc4_g31977T	10
OG0000129	Sarc4_g11571T	10
OG0000131	Sarc4_g18854T	10
OG0000131	Sarc4_g20703T	10
OG0000131	Sarc4_g12894T_Sarc4_g12895T	10
OG0000131	Sarc4_g23180T	10
OG0000131	Sarc4_g7485T	10
OG0000131	Sarc4_g12896T	10
OG0000132	Sarc4_g30268T	10
OG0000132	Sarc4_g11110T	10
OG0000133	Sarc4_g6375T	10
OG0000133	Sarc4_g10985T	10
OG0000133	Sarc4_g16537T	10
OG0000133	Sarc4_g16628T	10
OG0000135	Sarc4_g21764T	10
OG0000135	Sarc4_g21761T	10
OG0000135	Sarc4_g23315T	10
OG0000135	Sarc4_g12022T	10
OG0000135	Sarc4_g19608T	10
OG0000135	Sarc4_g7719T	10
OG0000135	Sarc4_g12023T	10
OG0000135	Sarc4_g19609T	10
OG0000135	Sarc4_g21763T	10
OG0000135	Sarc4_g19607T	10
OG0000135	Sarc4_g25446T	10
OG0000135	Sarc4_g21762T	10
OG0000136	Sarc4_g17473T	10
OG0000136	Sarc4_g19866T	10
OG0000136	Sarc4_g4200T	10
OG0000136	Sarc4_g17627T	10
OG0000136	Sarc4_g4194T	10
OG0000136	Sarc4_g4201T	10
OG0000136	Sarc4_g12085T	10
OG0000136	Sarc4_g2080T	10
OG0000136	Sarc4_g31816T	10
OG0000137	Sarc4_g23989T	10
OG0000137	Sarc4_g31810T	10
OG0000137	Sarc4_g22969T	10
OG0000137	Sarc4_g18967T	10
OG0000137	Sarc4_g29477T	10
OG0000137	Sarc4_g9328T	10
OG0000138	Sarc4_g5178T	10
OG0000138	Sarc4_g21802T	10
OG0000138	Sarc4_g11672T	10
OG0000138	Sarc4_g14140T	10
OG0000138	Sarc4_g30123T	10
OG0000138	Sarc4_g25348T	10
OG0000140	Sarc4_g29479T	10
OG0000140	Sarc4_g28446T	10
OG0000140	Sarc4_g2240T	10
OG0000141	Sarc4_g15789T	10
OG0000141	Sarc4_g26263T_Sarc4_g26264T	10
OG0000141	Sarc4_g21905T	10
OG0000141	Sarc4_g26564T	10
OG0000141	Sarc4_g19847T	10
OG0000141	Sarc4_g26561T	10
OG0000141	Sarc4_g12733T	10
OG0000141	Sarc4_g25444T	10
OG0000141	Sarc4_g25445T	10
OG0000141	Sarc4_g22894T	10
OG0000141	Sarc4_g9216T	10
OG0000142	Sarc4_g12026T	10
OG0000142	Sarc4_g22629T	10
OG0000142	Sarc4_g15340T	10
OG0000142	Sarc4_g21409T	10
OG0000142	Sarc4_g21396T	10
OG0000142	Sarc4_g33408T	10
OG0000142	Sarc4_g21397T	10
OG0000142	Sarc4_g1060T	10
OG0000142	Sarc4_g21395T	10
OG0000144	Sarc4_g18941T	7
OG0000144	Sarc4_g24953T	7
OG0000144	Sarc4_g26788T	7
OG0000144	Sarc4_g4345T	7
OG0000144	Sarc4_g31769T	7
OG0000144	Sarc4_g25388T	7
OG0000144	Sarc4_g24180T	7
OG0000144	Sarc4_g13365T	7
OG0000144	Sarc4_g21580T	7
OG0000144	Sarc4_g25847T	7
OG0000144	Sarc4_g12886T	7
OG0000144	Sarc4_g19541T	7
OG0000144	Sarc4_g24116T	7
OG0000144	Sarc4_g27046T	7
OG0000144	Sarc4_g21137T	7
OG0000144	Sarc4_g27316T	7
OG0000145	Sarc4_g11159T	10
OG0000145	Sarc4_g29282T	10
OG0000145	Sarc4_g4164T	10
OG0000145	Sarc4_g14545T	10
OG0000145	Sarc4_g33636T_Sarc4_g33637T	10
OG0000146	Sarc4_g2372T	10
OG0000146	Sarc4_g33273T	10
OG0000146	Sarc4_g27832T	10
OG0000146	Sarc4_g33187T	10
OG0000146	Sarc4_g32560T	10
OG0000146	Sarc4_g27789T	10
OG0000146	Sarc4_g28072T	10
OG0000146	Sarc4_g32561T	10
OG0000147	Sarc4_g24067T	10
OG0000147	Sarc4_g7012T	10
OG0000147	Sarc4_g7646T	10
OG0000147	Sarc4_g4078T	10
OG0000148	Sarc4_g3466T	10
OG0000148	Sarc4_g7225T	10
OG0000149	Sarc4_g16563T	10
OG0000150	Sarc4_g4071T	10
OG0000150	Sarc4_g5964T	10
OG0000150	Sarc4_g11074T	10
OG0000150	Sarc4_g8973T	10
OG0000150	Sarc4_g21223T	10
OG0000150	Sarc4_g18222T	10
OG0000150	Sarc4_g23017T	10
OG0000150	Sarc4_g23457T	10
OG0000150	Sarc4_g21224T	10
OG0000150	Sarc4_g23016T	10
OG0000150	Sarc4_g9516T	10
OG0000150	Sarc4_g8967T	10
OG0000150	Sarc4_g12426T	10
OG0000151	Sarc4_g2524T	10
OG0000151	Sarc4_g2952T	10
OG0000152	Sarc4_g3811T	10
OG0000152	Sarc4_g4498T	10
OG0000153	Sarc4_g12234T	10
OG0000153	Sarc4_g1587T	10
OG0000154	Sarc4_g32501T	10
OG0000154	Sarc4_g3982T	10
OG0000154	Sarc4_g30743T	10
OG0000154	Sarc4_g3356T	10
OG0000154	Sarc4_g5573T	10
OG0000154	Sarc4_g26649T	10
OG0000154	Sarc4_g21216T	10
OG0000154	Sarc4_g4506T	10
OG0000154	Sarc4_g17268T	10
OG0000154	Sarc4_g12900T	10
OG0000154	Sarc4_g23264T	10
OG0000154	Sarc4_g26365T	10
OG0000154	Sarc4_g21215T	10
OG0000154	Sarc4_g18434T	10
OG0000154	Sarc4_g5447T	10
OG0000155	Sarc4_g5291T	10
OG0000156	Sarc4_g12015T	10
OG0000156	Sarc4_g9151T	10
OG0000156	Sarc4_g30119T	10
OG0000158	Sarc4_g32251T	10
OG0000158	Sarc4_g4000T	10
OG0000158	Sarc4_g26572T	10
OG0000158	Sarc4_g25815T	10
OG0000159	Sarc4_g3250T	10
OG0000159	Sarc4_g12927T	10
OG0000160	Sarc4_g3551T	10
OG0000160	Sarc4_g11306T	10
OG0000160	Sarc4_g7765T	10
OG0000160	Sarc4_g4687T	10
OG0000160	Sarc4_g11305T	10
OG0000160	Sarc4_g22646T	10
OG0000160	Sarc4_g13358T	10
OG0000160	Sarc4_g22645T	10
OG0000161	Sarc4_g27781T	10
OG0000161	Sarc4_g27778T	10
OG0000161	Sarc4_g4193T	10
OG0000161	Sarc4_g8023T	10
OG0000161	Sarc4_g27780T	10
OG0000163	Sarc4_g31288T	10
OG0000163	Sarc4_g11550T	10
OG0000163	Sarc4_g29635T	10
OG0000163	Sarc4_g11770T	10
OG0000163	Sarc4_g19620T	10
OG0000163	Sarc4_g6120T	10
OG0000164	Sarc4_g30240T	10
OG0000164	Sarc4_g9108T	10
OG0000164	Sarc4_g26336T	10
OG0000164	Sarc4_g8471T	10
OG0000165	Sarc4_g4840T	10
OG0000165	Sarc4_g20642T	10
OG0000165	Sarc4_g20643T	10
OG0000166	Sarc4_g24790T	10
OG0000166	Sarc4_g24215T	10
OG0000166	Sarc4_g31931T	10
OG0000166	Sarc4_g22572T	10
OG0000166	Sarc4_g12020T	10
OG0000166	Sarc4_g25441T	10
OG0000166	Sarc4_g27926T	10
OG0000166	Sarc4_g29219T	10
OG0000166	Sarc4_g25656T	10
OG0000166	Sarc4_g24744T	10
OG0000166	Sarc4_g21972T	10
OG0000166	Sarc4_g28399T	10
OG0000166	Sarc4_g26401T	10
OG0000166	Sarc4_g25896T	10
OG0000166	Sarc4_g2281T	10
OG0000166	Sarc4_g11160T	10
OG0000166	Sarc4_g18633T	10
OG0000166	Sarc4_g24741T	10
OG0000167	Sarc4_g25176T	10
OG0000167	Sarc4_g26361T	10
OG0000167	Sarc4_g33151T	10
OG0000167	Sarc4_g19845T	10
OG0000167	Sarc4_g32763T	10
OG0000168	Sarc4_g32447T	10
OG0000168	Sarc4_g162T	10
OG0000168	Sarc4_g957T	10
OG0000168	Sarc4_g20332T	10
OG0000169	Sarc4_g23066T	10
OG0000169	Sarc4_g14615T	10
OG0000169	Sarc4_g21441T	10
OG0000171	Sarc4_g30533T	10
OG0000171	Sarc4_g30994T	10
OG0000171	Sarc4_g25452T	10
OG0000171	Sarc4_g1189T	10
OG0000171	Sarc4_g20128T	10
OG0000171	Sarc4_g1187T	10
OG0000171	Sarc4_g24197T	10
OG0000172	Sarc4_g32079T	10
OG0000172	Sarc4_g12926T	10
OG0000172	Sarc4_g7771T	10
OG0000172	Sarc4_g3249T	10
OG0000174	Sarc4_g15220T	10
OG0000174	Sarc4_g9547T	10
OG0000174	Sarc4_g2907T	10
OG0000174	Sarc4_g9545T	10
OG0000174	Sarc4_g22974T	10
OG0000174	Sarc4_g16547T	10
OG0000174	Sarc4_g2908T	10
OG0000174	Sarc4_g8599T_Sarc4_g8600T	10
OG0000174	Sarc4_g16549T	10
OG0000175	Sarc4_g22981T	10
OG0000175	Sarc4_g4549T	10
OG0000175	Sarc4_g23426T	10
OG0000176	Sarc4_g20537T	10
OG0000176	Sarc4_g12255T	10
OG0000176	Sarc4_g8850T	10
OG0000176	Sarc4_g19431T	10
OG0000177	Sarc4_g1278T	10
OG0000177	Sarc4_g9176T	10
OG0000177	Sarc4_g11654T	10
OG0000177	Sarc4_g12619T	10
OG0000177	Sarc4_g4476T	10
OG0000177	Sarc4_g1277T	10
OG0000177	Sarc4_g31105T	10
OG0000177	Sarc4_g31101T	10
OG0000177	Sarc4_g7637T	10
OG0000177	Sarc4_g4477T	10
OG0000178	Sarc4_g21482T	10
OG0000178	Sarc4_g14499T	10
OG0000178	Sarc4_g29458T	10
OG0000178	Sarc4_g22417T	10
OG0000178	Sarc4_g15126T	10
OG0000178	Sarc4_g5230T	10
OG0000179	Sarc4_g1207T	10
OG0000179	Sarc4_g7640T	10
OG0000179	Sarc4_g3610T	10
OG0000179	Sarc4_g4722T	10
OG0000179	Sarc4_g30753T	10
OG0000180	Sarc4_g19184T	10
OG0000180	Sarc4_g28471T	10
OG0000180	Sarc4_g4835T	10
OG0000181	Sarc4_g25254T	10
OG0000181	Sarc4_g26237T	10
OG0000181	Sarc4_g22980T	10
OG0000181	Sarc4_g27089T	10
OG0000181	Sarc4_g13500T	10
OG0000181	Sarc4_g8021T	10
OG0000182	Sarc4_g6389T	10
OG0000183	Sarc4_g25154T	10
OG0000183	Sarc4_g29295T	10
OG0000183	Sarc4_g7885T	10
OG0000184	Sarc4_g13144T_Sarc4_g13147T	10
OG0000184	Sarc4_g664T	10
OG0000184	Sarc4_g27214T	10
OG0000184	Sarc4_g21556T	10
OG0000185	Sarc4_g13976T	10
OG0000185	Sarc4_g24060T	10
OG0000186	Sarc4_g30246T	10
OG0000186	Sarc4_g23227T	10
OG0000187	Sarc4_g7226T	10
OG0000187	Sarc4_g4583T	10
OG0000187	Sarc4_g30748T	10
OG0000187	Sarc4_g33556T	10
OG0000187	Sarc4_g8348T	10
OG0000187	Sarc4_g30239T	10
OG0000187	Sarc4_g5127T	10
OG0000188	Sarc4_g11045T	10
OG0000189	Sarc4_g783T	10
OG0000189	Sarc4_g24786T	10
OG0000189	Sarc4_g25947T	10
OG0000189	Sarc4_g24247T	10
OG0000189	Sarc4_g33838T	10
OG0000189	Sarc4_g10513T	10
OG0000190	Sarc4_g6339T	10
OG0000190	Sarc4_g15475T	10
OG0000190	Sarc4_g4150T	10
OG0000191	Sarc4_g20770T	10
OG0000191	Sarc4_g6913T_Sarc4_g6915T	10
OG0000191	Sarc4_g12653T	10
OG0000191	Sarc4_g24816T	10
OG0000191	Sarc4_g32071T	10
OG0000192	Sarc4_g14241T	10
OG0000192	Sarc4_g7527T	10
OG0000192	Sarc4_g24172T	10
OG0000192	Sarc4_g18234T	10
OG0000192	Sarc4_g28652T	10
OG0000193	Sarc4_g31812T	10
OG0000193	Sarc4_g3310T	10
OG0000193	Sarc4_g7986T	10
OG0000196	Sarc4_g25712T	10
OG0000196	Sarc4_g26939T	10
OG0000196	Sarc4_g9243T	10
OG0000196	Sarc4_g501T	10
OG0000196	Sarc4_g25707T	10
OG0000197	Sarc4_g32335T	10
OG0000197	Sarc4_g14194T	10
OG0000197	Sarc4_g24676T	10
OG0000197	Sarc4_g12325T	10
OG0000197	Sarc4_g24859T	10
OG0000198	Sarc4_g16959T	10
OG0000198	Sarc4_g18993T	10
OG0000198	Sarc4_g18901T	10
OG0000198	Sarc4_g22097T	10
OG0000198	Sarc4_g25794T	10
OG0000199	Sarc4_g28015T	10
OG0000199	Sarc4_g5383T	10
OG0000199	Sarc4_g11304T	10
OG0000199	Sarc4_g356T	10
OG0000203	Sarc4_g2022T	10
OG0000204	Sarc4_g23390T	10
OG0000204	Sarc4_g22077T	10
OG0000204	Sarc4_g13097T	10
OG0000205	Sarc4_g19411T	10
OG0000205	Sarc4_g12396T	10
OG0000205	Sarc4_g29331T	10
OG0000208	Sarc4_g4039T	10
OG0000208	Sarc4_g18909T	10
OG0000208	Sarc4_g4815T	10
OG0000209	Sarc4_g11079T	10
OG0000209	Sarc4_g14145T	10
OG0000209	Sarc4_g11893T	10
OG0000209	Sarc4_g2667T	10
OG0000209	Sarc4_g6019T	10
OG0000209	Sarc4_g11998T	10
OG0000209	Sarc4_g5349T	10
OG0000210	Sarc4_g14031T	10
[truncated: 10,254 more rows]
