# Supplementary material for: A unicellular relative of animals generates a layer of polarized cells by actomyosin-dependent cellularization
Source: eLife journal article supplement (doi:10.7554/elife.49801), 2019-10-24
Supplement: supp [file elife_poa_e49801_Figure_5_source_data_1.pdf › elife_poa_e49801_Figure_5_source_data_1.pdf]

**Table S2 Gene ontology enrichment of expression clusters**

| GO: ID     | GO Term                                                                                   | p value  |
|------------|-------------------------------------------------------------------------------------------|----------|
| Cluster 1  |                                                                                           |          |
| GO:0040010 | positive regulation of growth rate                                                        | 2.5e-19  |
| GO:0040035 | hermaphrodite genitalia development                                                       | 1.5e-13  |
| GO:0006364 | rRNA processing                                                                           | 6.5e-12  |
| GO:0002119 | nematode larval development                                                               | 2.3e-11  |
| GO:0006898 | receptor-mediated endocytosis                                                             | 1.4e-09  |
| GO:0000398 | mRNA splicing, via spliceosome                                                            | 7.2e-07  |
| GO:0006259 | DNA metabolic process                                                                     | 1.5e-06  |
| GO:0009792 | embryo development ending in birth or egg hatching                                        | 2.6e-06  |
| GO:0042254 | ribosome biogenesis                                                                       | 8,00E-06 |
| GO:0000381 | regulation of alternative mRNA splicing, via spliceosome                                  | 8.4e-06  |
| GO:0006626 | protein targeting to mitochondrion                                                        | 1.6e-05  |
| GO:0030174 | regulation of DNA-dependent DNA replication initiation                                    | 3.5e-05  |
| GO:0030261 | chromosome condensation                                                                   | 4.9e-05  |
| GO:0040020 | regulation of meiotic nuclear division                                                    | 6.5e-05  |
| GO:0051084 | de novo' posttranslational protein folding                                                | 7.1e-05  |
| GO:0022008 | neurogenesis                                                                              | 8.5e-05  |
| GO:0032201 | telomere maintenance via semi-conservative replication                                    | 9.4e-05  |
| GO:0006271 | DNA strand elongation involved in DNA replication                                         | 1,00E-04 |
| GO:0006412 | translation                                                                               | 0.00016  |
| GO:0006385 | transcription elongation from RNA polymerase III promoter                                 | 0.00048  |
| GO:0006386 | termination of RNA polymerase III transcription                                           | 0.00048  |
| GO:0017183 | peptidyl-diphthamide biosynthetic process from peptidyl-histidine                         | 0.00048  |
| GO:0030488 | tRNA methylation                                                                          | 0.00053  |
| GO:0031167 | rRNA methylation                                                                          | 0.00059  |
| GO:0010833 | telomere maintenance via telomere lengthening                                             | 0.00064  |
| GO:0090305 | nucleic acid phosphodiester bond hydrolysis                                               | 0.00065  |
| GO:0006997 | nucleus organization                                                                      | 0.00068  |
| GO:0000731 | DNA synthesis involved in DNA repair                                                      | 0.00114  |
| GO:0006418 | tRNA aminoacylation for protein translation                                               | 0.00163  |
| GO:0006369 | termination of RNA polymerase II transcription                                            | 0.00174  |
| GO:0016973 | poly(A)+ mRNA export from nucleus                                                         | 0.00193  |
| GO:0006376 | mRNA splice site selection                                                                | 0.00193  |
| GO:0006334 | nucleosome assembly                                                                       | 0.00216  |
| GO:0000466 | maturation of 5.8S rRNA from tricistronic rRNA transcript (SSU-rRNA, 5.8S rRNA, LSU-rRNA) | 0.00217  |
| GO:0018992 | germ-line sex determination                                                               | 0.00217  |
| GO:0019509 | L-methionine salvage from methylthioadenosine                                             | 0.00221  |
| GO:0009926 | auxin polar transport                                                                     | 0.00221  |
| GO:0007339 | binding of sperm to zona pellucida                                                        | 0.00221  |
| GO:0009304 | tRNA transcription                                                                        | 0.00221  |
| GO:0006610 | ribosomal protein import into nucleus                                                     | 0.00221  |
| GO:0043558 | regulation of translational initiation in response to stress                              | 0.00236  |
| GO:0034969 | histone arginine methylation                                                              | 0.00236  |
| GO:0009303 | rRNA transcription                                                                        | 0.00267  |
| GO:0022618 | ribonucleoprotein complex assembly                                                        | 0.00279  |
| GO:0006406 | mRNA export from nucleus                                                                  | 0.00293  |

|            |                                                                                                        |         |
|------------|--------------------------------------------------------------------------------------------------------|---------|
| GO:0000722 | telomere maintenance via recombination                                                                 | 0.00297 |
| GO:0030490 | maturation of SSU-rRNA                                                                                 | 0.00312 |
| GO:0006595 | polyamine metabolic process                                                                            | 0.00321 |
| GO:0009113 | purine nucleobase biosynthetic process                                                                 | 0.00321 |
| GO:0032259 | methylation                                                                                            | 0.00404 |
| GO:0044260 | cellular macromolecule metabolic process                                                               | 0.00408 |
| GO:0048024 | regulation of mRNA splicing, via spliceosome                                                           | 0.00443 |
| GO:0043928 | exonucleolytic catabolism of deadenylated mRNA                                                         | 0.00459 |
| GO:0006268 | DNA unwinding involved in DNA replication                                                              | 0.00472 |
| GO:0044743 | protein transmembrane import into intracellular organelle                                              | 0.00481 |
| GO:0034660 | ncRNA metabolic process                                                                                | 0.00572 |
| GO:0007076 | mitotic chromosome condensation                                                                        | 0.00628 |
| GO:0002183 | cytoplasmic translational initiation                                                                   | 0.00677 |
| GO:0042246 | tissue regeneration                                                                                    | 0.00677 |
| GO:0000480 | endonucleolytic cleavage in 5'-ETS of tricistronic rRNA transcript (SSU-rRNA, 5.8S rRNA, LSU-rRNA)     | 0.00677 |
| GO:0000472 | endonucleolytic cleavage to generate mature 5'-end of SSU-rRNA from (SSU-rRNA, 5.8S rRNA, LSU-rRNA)    | 0.00677 |
| GO:0006284 | base-excision repair                                                                                   | 0.00743 |
| GO:0007095 | mitotic G2 DNA damage checkpoint                                                                       | 0.00873 |
| GO:0001703 | gastrulation with mouth forming first                                                                  | 0.00884 |
| GO:0000469 | cleavage involved in rRNA processing                                                                   | 0.009   |
| GO:0007089 | traversing start control point of mitotic cell cycle                                                   | 0.00915 |
| GO:0080034 | host response to induction by symbiont of tumor, nodule or growth in host                              | 0.00915 |
| GO:0035247 | peptidyl-arginine omega-N-methylation                                                                  | 0.00915 |
| GO:0000470 | maturation of LSU-rRNA                                                                                 | 0.00915 |
| GO:0009219 | pyrimidine deoxyribonucleotide metabolic process                                                       | 0.00915 |
| GO:0031122 | cytoplasmic microtubule organization                                                                   | 0.00965 |
| GO:0040022 | feminization of hermaphroditic germ-line                                                               | 0.00965 |
| GO:0006607 | NLS-bearing protein import into nucleus                                                                | 0.00965 |
| GO:0000447 | endonucleolytic cleavage in ITS1 to separate SSU-rRNA from 5.8S rRNA and LSU-rRNA from tricistronic rF | 0.00965 |
| GO:0000460 | maturation of 5.8S rRNA                                                                                | 0.00997 |
| Cluster 2  |                                                                                                        |         |
| GO:1901671 | positive regulation of superoxide dismutase activity                                                   | 0.0018  |
| GO:0048318 | axial mesoderm development                                                                             | 0.0018  |
| GO:0034463 | 90S preribosome assembly                                                                               | 0.0018  |
| GO:0042474 | middle ear morphogenesis                                                                               | 0.0073  |
| GO:0006412 | translation                                                                                            | 0.0075  |
| Cluster 3  |                                                                                                        |         |
| GO:0033120 | positive regulation of RNA splicing                                                                    | 0.00044 |
| GO:0000162 | tryptophan biosynthetic process                                                                        | 0.00087 |
| GO:0006777 | Mo-molybdopterin cofactor biosynthetic process                                                         | 0.00144 |
| GO:0034508 | centromere complex assembly                                                                            | 0.00144 |
| GO:0032324 | molybdopterin cofactor biosynthetic process                                                            | 0.00298 |
| GO:0045144 | meiotic sister chromatid segregation                                                                   | 0.00298 |
| GO:0006913 | nucleocytoplasmic transport                                                                            | 0.0074  |
| Cluster 4  |                                                                                                        |         |
| GO:0006145 | purine nucleobase catabolic process                                                                    | 0,0011  |
| GO:0006573 | valine metabolic process                                                                               | 0,0024  |
| GO:0042430 | indole-containing compound metabolic process                                                           | 0,003   |

|            |                                              |        |
|------------|----------------------------------------------|--------|
| GO:0031365 | N-terminal protein amino acid modification   | 0,004  |
| GO:0008593 | regulation of Notch signaling pathway        | 0,0041 |
| GO:0055114 | oxidation-reduction process                  | 0,0041 |
| GO:0009083 | branched-chain amino acid catabolic process  | 0,0072 |
| GO:0009072 | aromatic amino acid family metabolic process | 0,0085 |

#### Cluster 5

|            |                                                                                   |          |
|------------|-----------------------------------------------------------------------------------|----------|
| GO:0006891 | intra-Golgi vesicle-mediated transport                                            | 6.1e-05  |
| GO:0019915 | lipid storage                                                                     | 0.00028  |
| GO:0046474 | glycerophospholipid biosynthetic process                                          | 0.00046  |
| GO:0051208 | sequestering of calcium ion                                                       | 9,00E-04 |
| GO:0006890 | retrograde vesicle-mediated transport, Golgi to endoplasmic reticulum             | 0.00115  |
| GO:0048205 | COPI coating of Golgi vesicle                                                     | 0.00116  |
| GO:0007030 | Golgi organization                                                                | 0.00126  |
| GO:0016185 | synaptic vesicle budding from presynaptic endocytic zone membrane                 | 0.00239  |
| GO:0035158 | regulation of tube diameter, open tracheal system                                 | 0.00241  |
| GO:0044106 | cellular amine metabolic process                                                  | 0.00269  |
| GO:0019884 | antigen processing and presentation of exogenous antigen                          | 0.00289  |
| GO:0010883 | regulation of lipid storage                                                       | 0.00321  |
| GO:0006901 | vesicle coating                                                                   | 0.0039   |
| GO:0002474 | antigen processing and presentation of peptide antigen via MHC class I            | 0.0042   |
| GO:0030536 | larval feeding behavior                                                           | 0.00472  |
| GO:0046487 | glyoxylate metabolic process                                                      | 0.00472  |
| GO:0035149 | lumen formation, open tracheal system                                             | 0.00472  |
| GO:0072578 | neurotransmitter-gated ion channel clustering                                     | 0.00472  |
| GO:0048079 | regulation of cuticle pigmentation                                                | 0.00472  |
| GO:0032075 | positive regulation of nuclease activity                                          | 0.00511  |
| GO:0019886 | antigen processing and presentation of exogenous peptide antigen via MHC class II | 0.00511  |
| GO:0015908 | fatty acid transport                                                              | 0.00534  |
| GO:0030258 | lipid modification                                                                | 0.00753  |
| GO:0050690 | regulation of defense response to virus by virus                                  | 0.00772  |
| GO:0034629 | cellular protein-containing complex localization                                  | 0.00772  |
| GO:0007286 | spermatid development                                                             | 0.00775  |
| GO:0045807 | positive regulation of endocytosis                                                | 0.00775  |
| GO:0032101 | regulation of response to external stimulus                                       | 0.00936  |
| GO:0044070 | regulation of anion transport                                                     | 0.00983  |

#### Cluster 6

|            |                                                     |          |
|------------|-----------------------------------------------------|----------|
| GO:0008360 | regulation of cell shape                            | 1.7e-05  |
| GO:0061024 | membrane organization                               | 3.4e-05  |
| GO:0019226 | transmission of nerve impulse                       | 4.6e-05  |
| GO:0016197 | endosomal transport                                 | 4.6e-05  |
| GO:0030833 | regulation of actin filament polymerization         | 5.5e-05  |
| GO:0048011 | neurotrophin TRK receptor signaling pathway         | 5.5e-05  |
| GO:0008543 | fibroblast growth factor receptor signaling pathway | 0.00013  |
| GO:0060341 | regulation of cellular localization                 | 0.00013  |
| GO:0019228 | neuronal action potential                           | 0.00016  |
| GO:0007015 | actin filament organization                         | 2,00E-04 |
| GO:0007173 | epidermal growth factor receptor signaling pathway  | 0.00021  |
| GO:0030163 | protein catabolic process                           | 0.00021  |

|                   |                                                                                   |          |
|-------------------|-----------------------------------------------------------------------------------|----------|
| <b>GO:0006821</b> | chloride transport                                                                | 0.00024  |
| <b>GO:0035023</b> | regulation of Rho protein signal transduction                                     | 0.00028  |
| <b>GO:0043547</b> | positive regulation of GTPase activity                                            | 0.00031  |
| <b>GO:0007110</b> | meiosis I cytokinesis                                                             | 0.00034  |
| <b>GO:0007111</b> | meiosis II cytokinesis                                                            | 0.00034  |
| <b>GO:0016080</b> | synaptic vesicle targeting                                                        | 0.00035  |
| <b>GO:0042552</b> | myelination                                                                       | 0.00052  |
| <b>GO:0007268</b> | chemical synaptic transmission                                                    | 0.00053  |
| <b>GO:0033121</b> | regulation of purine nucleotide catabolic process                                 | 0.00055  |
| <b>GO:0006928</b> | movement of cell or subcellular component                                         | 6,00E-04 |
| <b>GO:1901615</b> | organic hydroxy compound metabolic process                                        | 6,00E-04 |
| <b>GO:0051650</b> | establishment of vesicle localization                                             | 0.00062  |
| <b>GO:0009118</b> | regulation of nucleoside metabolic process                                        | 0.00065  |
| <b>GO:0006874</b> | cellular calcium ion homeostasis                                                  | 0.00074  |
| <b>GO:0007265</b> | Ras protein signal transduction                                                   | 0.00078  |
| <b>GO:0070588</b> | calcium ion transmembrane transport                                               | 0.00083  |
| <b>GO:0032147</b> | activation of protein kinase activity                                             | 0.00085  |
| <b>GO:0019886</b> | antigen processing and presentation of exogenous peptide antigen via MHC class II | 0.00095  |
| <b>GO:0048259</b> | regulation of receptor-mediated endocytosis                                       | 0.00096  |
| <b>GO:0044089</b> | positive regulation of cellular component biogenesis                              | 0.00098  |
| <b>GO:0007409</b> | axonogenesis                                                                      | 0.00113  |
| <b>GO:0051046</b> | regulation of secretion                                                           | 0.0012   |
| <b>GO:0030155</b> | regulation of cell adhesion                                                       | 0.00123  |
| <b>GO:0034314</b> | Arp2/3 complex-mediated actin nucleation                                          | 0.00151  |
| <b>GO:0031018</b> | endocrine pancreas development                                                    | 0.00151  |
| <b>GO:0007031</b> | peroxisome organization                                                           | 0.00155  |
| <b>GO:0071242</b> | cellular response to ammonium ion                                                 | 0.00155  |
| <b>GO:0048193</b> | Golgi vesicle transport                                                           | 0.00164  |
| <b>GO:0048137</b> | spermatocyte division                                                             | 0.0018   |
| <b>GO:0048814</b> | regulation of dendrite morphogenesis                                              | 0.0018   |
| <b>GO:0006487</b> | protein N-linked glycosylation                                                    | 0.00187  |
| <b>GO:0030031</b> | cell projection assembly                                                          | 0.0019   |
| <b>GO:0030855</b> | epithelial cell differentiation                                                   | 0.00194  |
| <b>GO:0000212</b> | meiotic spindle organization                                                      | 0.00198  |
| <b>GO:0000281</b> | mitotic cytokinesis                                                               | 0.00206  |
| <b>GO:0006635</b> | fatty acid beta-oxidation                                                         | 0.00206  |
| <b>GO:0042981</b> | regulation of apoptotic process                                                   | 0.00207  |
| <b>GO:0043161</b> | proteasome-mediated ubiquitin-dependent protein catabolic process                 | 0.00215  |
| <b>GO:0048666</b> | neuron development                                                                | 0.00219  |
| <b>GO:0046488</b> | phosphatidylinositol metabolic process                                            | 0.00224  |
| <b>GO:0010565</b> | regulation of cellular ketone metabolic process                                   | 0.00238  |
| <b>GO:0009968</b> | negative regulation of signal transduction                                        | 0.00239  |
| <b>GO:0030242</b> | autophagy of peroxisome                                                           | 0.0025   |
| <b>GO:0051278</b> | fungus-type cell wall polysaccharide biosynthetic process                         | 0.0025   |
| <b>GO:0046325</b> | negative regulation of glucose import                                             | 0.0025   |
| <b>GO:0035372</b> | protein localization to microtubule                                               | 0.0025   |
| <b>GO:0060049</b> | regulation of protein glycosylation                                               | 0.0025   |
| <b>GO:0016137</b> | glycoside metabolic process                                                       | 0.0025   |

|                   |                                                                                                 |         |
|-------------------|-------------------------------------------------------------------------------------------------|---------|
| <b>GO:0035118</b> | embryonic pectoral fin morphogenesis                                                            | 0.0025  |
| <b>GO:0010256</b> | endomembrane system organization                                                                | 0.00252 |
| <b>GO:0032880</b> | regulation of protein localization                                                              | 0.00261 |
| <b>GO:0009617</b> | response to bacterium                                                                           | 0.00273 |
| <b>GO:0050654</b> | chondroitin sulfate proteoglycan metabolic process                                              | 0.00275 |
| <b>GO:0001707</b> | mesoderm formation                                                                              | 0.00275 |
| <b>GO:1900544</b> | positive regulation of purine nucleotide metabolic process                                      | 0.00275 |
| <b>GO:0051261</b> | protein depolymerization                                                                        | 0.00291 |
| <b>GO:0007605</b> | sensory perception of sound                                                                     | 0.00291 |
| <b>GO:0032506</b> | cytokinetic process                                                                             | 0.00294 |
| <b>GO:0006023</b> | aminoglycan biosynthetic process                                                                | 0.00311 |
| <b>GO:0051289</b> | protein homotetramerization                                                                     | 0.00311 |
| <b>GO:0051351</b> | positive regulation of ligase activity                                                          | 0.00331 |
| <b>GO:0051443</b> | positive regulation of ubiquitin-protein transferase activity                                   | 0.00331 |
| <b>GO:0007626</b> | locomotory behavior                                                                             | 0.00351 |
| <b>GO:0030010</b> | establishment of cell polarity                                                                  | 0.00356 |
| <b>GO:0007112</b> | male meiosis cytokinesis                                                                        | 0.00359 |
| <b>GO:0046135</b> | pyrimidine nucleoside catabolic process                                                         | 0.00359 |
| <b>GO:0030166</b> | proteoglycan biosynthetic process                                                               | 0.00359 |
| <b>GO:0019932</b> | second-messenger-mediated signaling                                                             | 0.00391 |
| <b>GO:0002479</b> | antigen processing and presentation of exogenous peptide antigen via MHC class I, TAP-dependent | 0.00394 |
| <b>GO:0006893</b> | Golgi to plasma membrane transport                                                              | 0.00401 |
| <b>GO:0005979</b> | regulation of glycogen biosynthetic process                                                     | 0.00405 |
| <b>GO:0010677</b> | negative regulation of cellular carbohydrate metabolic process                                  | 0.00405 |
| <b>GO:0031340</b> | positive regulation of vesicle fusion                                                           | 0.00405 |
| <b>GO:0072329</b> | monocarboxylic acid catabolic process                                                           | 0.00413 |
| <b>GO:0023056</b> | positive regulation of signaling                                                                | 0.00424 |
| <b>GO:0051130</b> | positive regulation of cellular component organization                                          | 0.00433 |
| <b>GO:0007254</b> | JNK cascade                                                                                     | 0.00434 |
| <b>GO:0030203</b> | glycosaminoglycan metabolic process                                                             | 0.00444 |
| <b>GO:0051592</b> | response to calcium ion                                                                         | 0.00453 |
| <b>GO:0007188</b> | adenylate cyclase-modulating G protein-coupled receptor signaling pathway                       | 0.00469 |
| <b>GO:0032940</b> | secretion by cell                                                                               | 0.00501 |
| <b>GO:0050730</b> | regulation of peptidyl-tyrosine phosphorylation                                                 | 0.00506 |
| <b>GO:0043406</b> | positive regulation of MAP kinase activity                                                      | 0.00506 |
| <b>GO:0090130</b> | tissue migration                                                                                | 0.00513 |
| <b>GO:0030433</b> | ubiquitin-dependent ERAD pathway                                                                | 0.00534 |
| <b>GO:0008356</b> | asymmetric cell division                                                                        | 0.00541 |
| <b>GO:0051653</b> | spindle localization                                                                            | 0.00541 |
| <b>GO:0034620</b> | cellular response to unfolded protein                                                           | 0.00597 |
| <b>GO:0006977</b> | DNA damage response, signal transduction by p53 class mediator resulting in cell cycle arrest   | 0.00605 |
| <b>GO:0050679</b> | positive regulation of epithelial cell proliferation                                            | 0.00616 |
| <b>GO:0120035</b> | regulation of plasma membrane bounded cell projection organization                              | 0.00617 |
| <b>GO:0035020</b> | regulation of Rac protein signal transduction                                                   | 0.00639 |
| <b>GO:0006895</b> | Golgi to endosome transport                                                                     | 0.00639 |
| <b>GO:0007608</b> | sensory perception of smell                                                                     | 0.00639 |
| <b>GO:0006687</b> | glycosphingolipid metabolic process                                                             | 0.00639 |
| <b>GO:0051352</b> | negative regulation of ligase activity                                                          | 0.00642 |

|                   |                                                                        |         |
|-------------------|------------------------------------------------------------------------|---------|
| <b>GO:0051444</b> | negative regulation of ubiquitin-protein transferase activity          | 0.00642 |
| <b>GO:0006904</b> | vesicle docking involved in exocytosis                                 | 0.00679 |
| <b>GO:0050851</b> | antigen receptor-mediated signaling pathway                            | 0.00679 |
| <b>GO:0019933</b> | cAMP-mediated signaling                                                | 0.00679 |
| <b>GO:0000916</b> | actomyosin contractile ring contraction                                | 0.00679 |
| <b>GO:0044273</b> | sulfur compound catabolic process                                      | 0.00702 |
| <b>GO:0001745</b> | compound eye morphogenesis                                             | 0.00713 |
| <b>GO:0007596</b> | blood coagulation                                                      | 0.00741 |
| <b>GO:0005975</b> | carbohydrate metabolic process                                         | 0.0076  |
| <b>GO:0043062</b> | extracellular structure organization                                   | 0.00778 |
| <b>GO:0061640</b> | cytoskeleton-dependent cytokinesis                                     | 0.00794 |
| <b>GO:0010647</b> | positive regulation of cell communication                              | 0.00805 |
| <b>GO:0001505</b> | regulation of neurotransmitter levels                                  | 0.00823 |
| <b>GO:0044262</b> | cellular carbohydrate metabolic process                                | 0.00833 |
| <b>GO:1904062</b> | regulation of cation transmembrane transport                           | 0.00835 |
| <b>GO:0045921</b> | positive regulation of exocytosis                                      | 0.00843 |
| <b>GO:0002474</b> | antigen processing and presentation of peptide antigen via MHC class I | 0.00868 |
| <b>GO:0070207</b> | protein homotrimerization                                              | 0.009   |
| <b>GO:0071377</b> | cellular response to glucagon stimulus                                 | 0.009   |
| <b>GO:0019673</b> | GDP-mannose metabolic process                                          | 0.009   |
| <b>GO:0075306</b> | regulation of conidium formation                                       | 0.009   |
| <b>GO:0007144</b> | female meiosis I                                                       | 0.009   |
| <b>GO:0002673</b> | regulation of acute inflammatory response                              | 0.009   |
| <b>GO:0044091</b> | membrane biogenesis                                                    | 0.009   |
| <b>GO:0030866</b> | cortical actin cytoskeleton organization                               | 0.00906 |
| <b>GO:0030258</b> | lipid modification                                                     | 0.00916 |
| <b>GO:0006984</b> | ER-nucleus signaling pathway                                           | 0.00921 |
| <b>GO:0048599</b> | oocyte development                                                     | 0.00929 |
| <b>GO:0048488</b> | synaptic vesicle endocytosis                                           | 0.00931 |
| <b>GO:0090288</b> | negative regulation of cellular response to growth factor stimulus     | 0.00951 |
| <b>GO:0010863</b> | positive regulation of phospholipase C activity                        | 0.00951 |
| <b>GO:0001667</b> | ameboidal-type cell migration                                          | 0.00972 |
| <b>GO:0097164</b> | ammonium ion metabolic process                                         | 0.00983 |
| <b>GO:0001933</b> | negative regulation of protein phosphorylation                         | 0.00983 |
| <b>GO:0046879</b> | hormone secretion                                                      | 0.00997 |

#### Cluster 7

|                   |                                                      |          |
|-------------------|------------------------------------------------------|----------|
| <b>GO:0008045</b> | motor neuron axon guidance                           | 2.6e-09  |
| <b>GO:0033121</b> | regulation of purine nucleotide catabolic process    | 3.9e-07  |
| <b>GO:0009118</b> | regulation of nucleoside metabolic process           | 4.4e-07  |
| <b>GO:0072015</b> | glomerular visceral epithelial cell development      | 4.2e-05  |
| <b>GO:0003382</b> | epithelial cell morphogenesis                        | 6.6e-05  |
| <b>GO:0007155</b> | cell adhesion                                        | 8.4e-05  |
| <b>GO:0031578</b> | mitotic spindle orientation checkpoint               | 1,00E-04 |
| <b>GO:0001736</b> | establishment of planar polarity                     | 0.00012  |
| <b>GO:0050680</b> | negative regulation of epithelial cell proliferation | 0.00012  |
| <b>GO:0043547</b> | positive regulation of GTPase activity               | 0.00014  |
| <b>GO:0045571</b> | negative regulation of imaginal disc growth          | 0.00019  |
| <b>GO:0071260</b> | cellular response to mechanical stimulus             | 0.00019  |

|                   |                                                                |          |
|-------------------|----------------------------------------------------------------|----------|
| <b>GO:0042491</b> | inner ear auditory receptor cell differentiation               | 2,00E-04 |
| <b>GO:0019991</b> | septate junction assembly                                      | 0.00026  |
| <b>GO:0043588</b> | skin development                                               | 0.00031  |
| <b>GO:0007160</b> | cell-matrix adhesion                                           | 0.00037  |
| <b>GO:0016321</b> | female meiosis chromosome segregation                          | 0.00043  |
| <b>GO:0030334</b> | regulation of cell migration                                   | 0.00044  |
| <b>GO:0007136</b> | meiotic prophase II                                            | 0.00049  |
| <b>GO:0045061</b> | thymic T cell selection                                        | 0.00049  |
| <b>GO:2000311</b> | regulation of AMPA receptor activity                           | 0.00049  |
| <b>GO:0033563</b> | dorsal/ventral axon guidance                                   | 0.00055  |
| <b>GO:0000916</b> | actomyosin contractile ring contraction                        | 0.00055  |
| <b>GO:0030029</b> | actin filament-based process                                   | 0.00063  |
| <b>GO:0019954</b> | asexual reproduction                                           | 0.00067  |
| <b>GO:0042048</b> | olfactory behavior                                             | 8,00E-04 |
| <b>GO:0090529</b> | cell septum assembly                                           | 8,00E-04 |
| <b>GO:0002286</b> | T cell activation involved in immune response                  | 8,00E-04 |
| <b>GO:0035120</b> | post-embryonic appendage morphogenesis                         | 0.00087  |
| <b>GO:0035114</b> | imaginal disc-derived appendage morphogenesis                  | 0.00095  |
| <b>GO:2000146</b> | negative regulation of cell motility                           | 0.00106  |
| <b>GO:0043087</b> | regulation of GTPase activity                                  | 0.00121  |
| <b>GO:0043542</b> | endothelial cell migration                                     | 0.00134  |
| <b>GO:0061245</b> | establishment or maintenance of bipolar cell polarity          | 0.00134  |
| <b>GO:0008104</b> | protein localization                                           | 0.00139  |
| <b>GO:0070863</b> | positive regulation of protein exit from endoplasmic reticulum | 0.00144  |
| <b>GO:0033599</b> | regulation of mammary gland epithelial cell proliferation      | 0.00144  |
| <b>GO:0032232</b> | negative regulation of actin filament bundle assembly          | 0.00144  |
| <b>GO:1900006</b> | positive regulation of dendrite development                    | 0.00144  |
| <b>GO:0051764</b> | actin crosslink formation                                      | 0.00144  |
| <b>GO:0000281</b> | mitotic cytokinesis                                            | 0.00145  |
| <b>GO:0071478</b> | cellular response to radiation                                 | 0.00176  |
| <b>GO:0003008</b> | system process                                                 | 0.00189  |
| <b>GO:0060070</b> | canonical Wnt signaling pathway                                | 0.002    |
| <b>GO:1905330</b> | regulation of morphogenesis of an epithelium                   | 0.00201  |
| <b>GO:0030856</b> | regulation of epithelial cell differentiation                  | 0.00201  |
| <b>GO:0048570</b> | notochord morphogenesis                                        | 0.00201  |
| <b>GO:0043113</b> | receptor clustering                                            | 0.00201  |
| <b>GO:0001525</b> | angiogenesis                                                   | 0.00209  |
| <b>GO:0006928</b> | movement of cell or subcellular component                      | 0.00229  |
| <b>GO:0001935</b> | endothelial cell proliferation                                 | 0.00233  |
| <b>GO:0007391</b> | dorsal closure                                                 | 0.00233  |
| <b>GO:0007560</b> | imaginal disc morphogenesis                                    | 0.00252  |
| <b>GO:0051493</b> | regulation of cytoskeleton organization                        | 0.00254  |
| <b>GO:0001764</b> | neuron migration                                               | 0.00257  |
| <b>GO:0031100</b> | animal organ regeneration                                      | 0.00257  |
| <b>GO:0006468</b> | protein phosphorylation                                        | 0.00259  |
| <b>GO:2000114</b> | regulation of establishment of cell polarity                   | 0.00284  |
| <b>GO:0032489</b> | regulation of Cdc42 protein signal transduction                | 0.00284  |
| <b>GO:0030835</b> | negative regulation of actin filament depolymerization         | 0.00284  |

|                   |                                                                        |         |
|-------------------|------------------------------------------------------------------------|---------|
| <b>GO:0051971</b> | positive regulation of transmission of nerve impulse                   | 0.00284 |
| <b>GO:0010091</b> | trichome branching                                                     | 0.00284 |
| <b>GO:0003094</b> | glomerular filtration                                                  | 0.00284 |
| <b>GO:0048646</b> | anatomical structure formation involved in morphogenesis               | 0.00307 |
| <b>GO:0051056</b> | regulation of small GTPase mediated signal transduction                | 0.0032  |
| <b>GO:0046847</b> | filopodium assembly                                                    | 0.00322 |
| <b>GO:0035220</b> | wing disc development                                                  | 0.00349 |
| <b>GO:0035023</b> | regulation of Rho protein signal transduction                          | 0.00367 |
| <b>GO:0007264</b> | small GTPase mediated signal transduction                              | 0.00391 |
| <b>GO:0034333</b> | adherens junction assembly                                             | 0.00399 |
| <b>GO:2000027</b> | regulation of animal organ morphogenesis                               | 0.00399 |
| <b>GO:0060562</b> | epithelial tube morphogenesis                                          | 0.00443 |
| <b>GO:0030582</b> | reproductive fruiting body development                                 | 0.00462 |
| <b>GO:0030708</b> | gemarium-derived female germ-line cyst encapsulation                   | 0.00466 |
| <b>GO:0048846</b> | axon extension involved in axon guidance                               | 0.00466 |
| <b>GO:0045730</b> | respiratory burst                                                      | 0.00466 |
| <b>GO:0035204</b> | negative regulation of lamellocyte differentiation                     | 0.00466 |
| <b>GO:0008302</b> | female gemline ring canal formation, actin assembly                    | 0.00466 |
| <b>GO:0050665</b> | hydrogen peroxide biosynthetic process                                 | 0.00466 |
| <b>GO:0042554</b> | superoxide anion generation                                            | 0.00466 |
| <b>GO:0036360</b> | sorocarp stalk morphogenesis                                           | 0.00466 |
| <b>GO:1901069</b> | guanosine-containing compound catabolic process                        | 0.00519 |
| <b>GO:0008360</b> | regulation of cell shape                                               | 0.00519 |
| <b>GO:0040039</b> | inductive cell migration                                               | 0.00566 |
| <b>GO:0009887</b> | animal organ morphogenesis                                             | 0.00571 |
| <b>GO:0007009</b> | plasma membrane organization                                           | 0.00573 |
| <b>GO:0001838</b> | embryonic epithelial tube formation                                    | 0.00573 |
| <b>GO:0051049</b> | regulation of transport                                                | 0.00613 |
| <b>GO:0050764</b> | regulation of phagocytosis                                             | 0.00677 |
| <b>GO:0051026</b> | chiasma assembly                                                       | 0.00689 |
| <b>GO:0000915</b> | actomyosin contractile ring assembly                                   | 0.00689 |
| <b>GO:0050806</b> | positive regulation of synaptic transmission                           | 0.00689 |
| <b>GO:0032510</b> | endosome to lysosome transport via multivesicular body sorting pathway | 0.00689 |
| <b>GO:0046755</b> | viral budding                                                          | 0.00689 |
| <b>GO:0003081</b> | regulation of systemic arterial blood pressure by renin-angiotensin    | 0.00689 |
| <b>GO:0048812</b> | neuron projection morphogenesis                                        | 0.0069  |
| <b>GO:0042060</b> | wound healing                                                          | 0.00693 |
| <b>GO:0007265</b> | Ras protein signal transduction                                        | 0.00709 |
| <b>GO:0046039</b> | GTP metabolic process                                                  | 0.00762 |
| <b>GO:0044766</b> | multi-organism transport                                               | 0.00791 |
| <b>GO:0098609</b> | cell-cell adhesion                                                     | 0.0081  |
| <b>GO:0060538</b> | skeletal muscle organ development                                      | 0.0081  |
| <b>GO:0010769</b> | regulation of cell morphogenesis involved in differentiation           | 0.00854 |
| <b>GO:0021953</b> | central nervous system neuron differentiation                          | 0.00916 |
| <b>GO:0070507</b> | regulation of microtubule cytoskeleton organization                    | 0.00939 |
| <b>GO:0072089</b> | stem cell proliferation                                                | 0.00939 |
| <b>GO:0051645</b> | Golgi localization                                                     | 0.00951 |
| <b>GO:0045887</b> | positive regulation of synaptic growth at neuromuscular junction       | 0.00951 |



|                   |                                                   |         |
|-------------------|---------------------------------------------------|---------|
| <b>GO:0044130</b> | negative regulation of growth of symbiont in host | 0.00951 |
| <b>GO:0010596</b> | negative regulation of endothelial cell migration | 0.00951 |
| <b>GO:0051492</b> | regulation of stress fiber assembly               | 0.00951 |
| <b>GO:0035090</b> | maintenance of apical/basal cell polarity         | 0.00951 |
| <b>GO:0031103</b> | axon regeneration                                 | 0.00951 |
| <b>GO:0048592</b> | eye morphogenesis                                 | 0.00965 |

#### Cluster 8

|                   |                                                                  |         |
|-------------------|------------------------------------------------------------------|---------|
| <b>GO:0008285</b> | negative regulation of cell population proliferation             | 0.00016 |
| <b>GO:0007169</b> | transmembrane receptor protein tyrosine kinase signaling pathway | 0.00088 |
| <b>GO:0007267</b> | cell-cell signaling                                              | 0.00101 |
| <b>GO:0030336</b> | negative regulation of cell migration                            | 0.00105 |
| <b>GO:0034109</b> | homotypic cell-cell adhesion                                     | 0.00183 |
| <b>GO:0007596</b> | blood coagulation                                                | 0.00194 |
| <b>GO:0032387</b> | negative regulation of intracellular transport                   | 0.00259 |
| <b>GO:0045765</b> | regulation of angiogenesis                                       | 0.00302 |
| <b>GO:0051612</b> | negative regulation of serotonin uptake                          | 0.00313 |
| <b>GO:0007263</b> | nitric oxide mediated signal transduction                        | 0.00313 |
| <b>GO:0042738</b> | exogenous drug catabolic process                                 | 0.00313 |
| <b>GO:0009725</b> | response to hormone                                              | 0.00401 |
| <b>GO:0051224</b> | negative regulation of protein transport                         | 0.0045  |
| <b>GO:0010959</b> | regulation of metal ion transport                                | 0.00594 |
| <b>GO:0031284</b> | positive regulation of guanylate cyclase activity                | 0.00626 |
| <b>GO:0034332</b> | adherens junction organization                                   | 0.00657 |
| <b>GO:0045216</b> | cell-cell junction organization                                  | 0.0069  |
| <b>GO:0010038</b> | response to metal ion                                            | 0.00858 |
| <b>GO:0006154</b> | adenosine catabolic process                                      | 0.00937 |
| <b>GO:0045776</b> | negative regulation of blood pressure                            | 0.00937 |
| <b>GO:0045779</b> | negative regulation of bone resorption                           | 0.00937 |
| <b>GO:0010761</b> | fibroblast migration                                             | 0.00937 |
| <b>GO:0009816</b> | defense response to bacterium, incompatible interaction          | 0.00937 |

#### Cluster 9

|                   |                                         |        |
|-------------------|-----------------------------------------|--------|
| <b>GO:0015991</b> | ATP hydrolysis coupled proton transport | 0.0015 |
|-------------------|-----------------------------------------|--------|
