# Supplementary figures and images for: A unicellular relative of animals generates a layer of polarized cells by actomyosin-dependent cellularization
Source: eLife journal article supplement (doi:10.7554/elife.49801), 2019-10-24

Figure 1-figure supplement 1

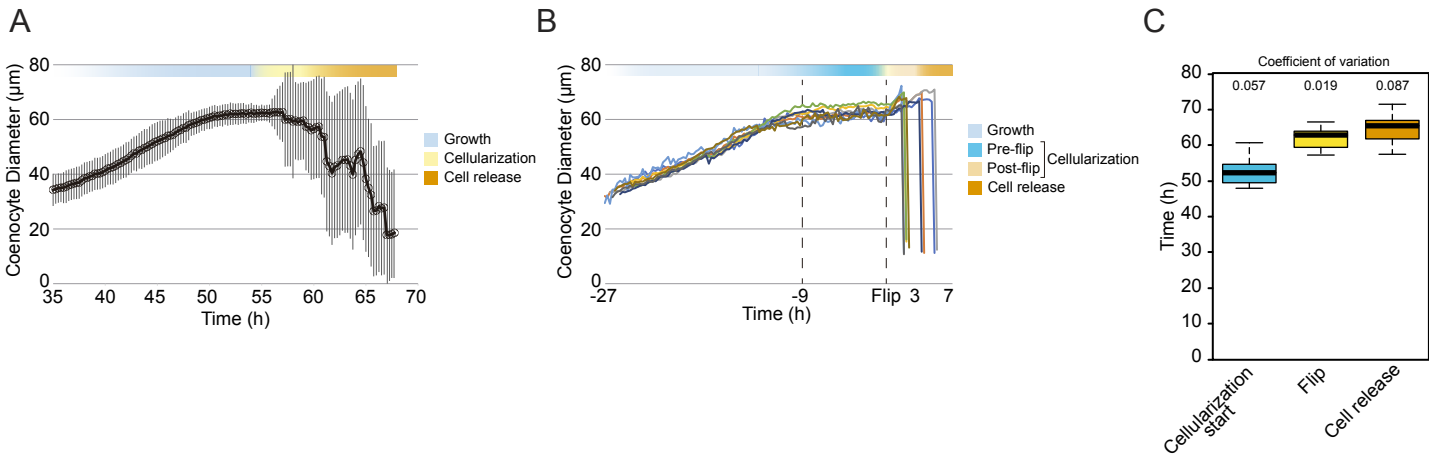

Supplement: supp [file elife_poa_e49801_Figure_1_figure_supplement_1.pdf › elife_poa_e49801_Figure_1_figure_supplement_1.pdf]

Figure 2-figure supplement 1

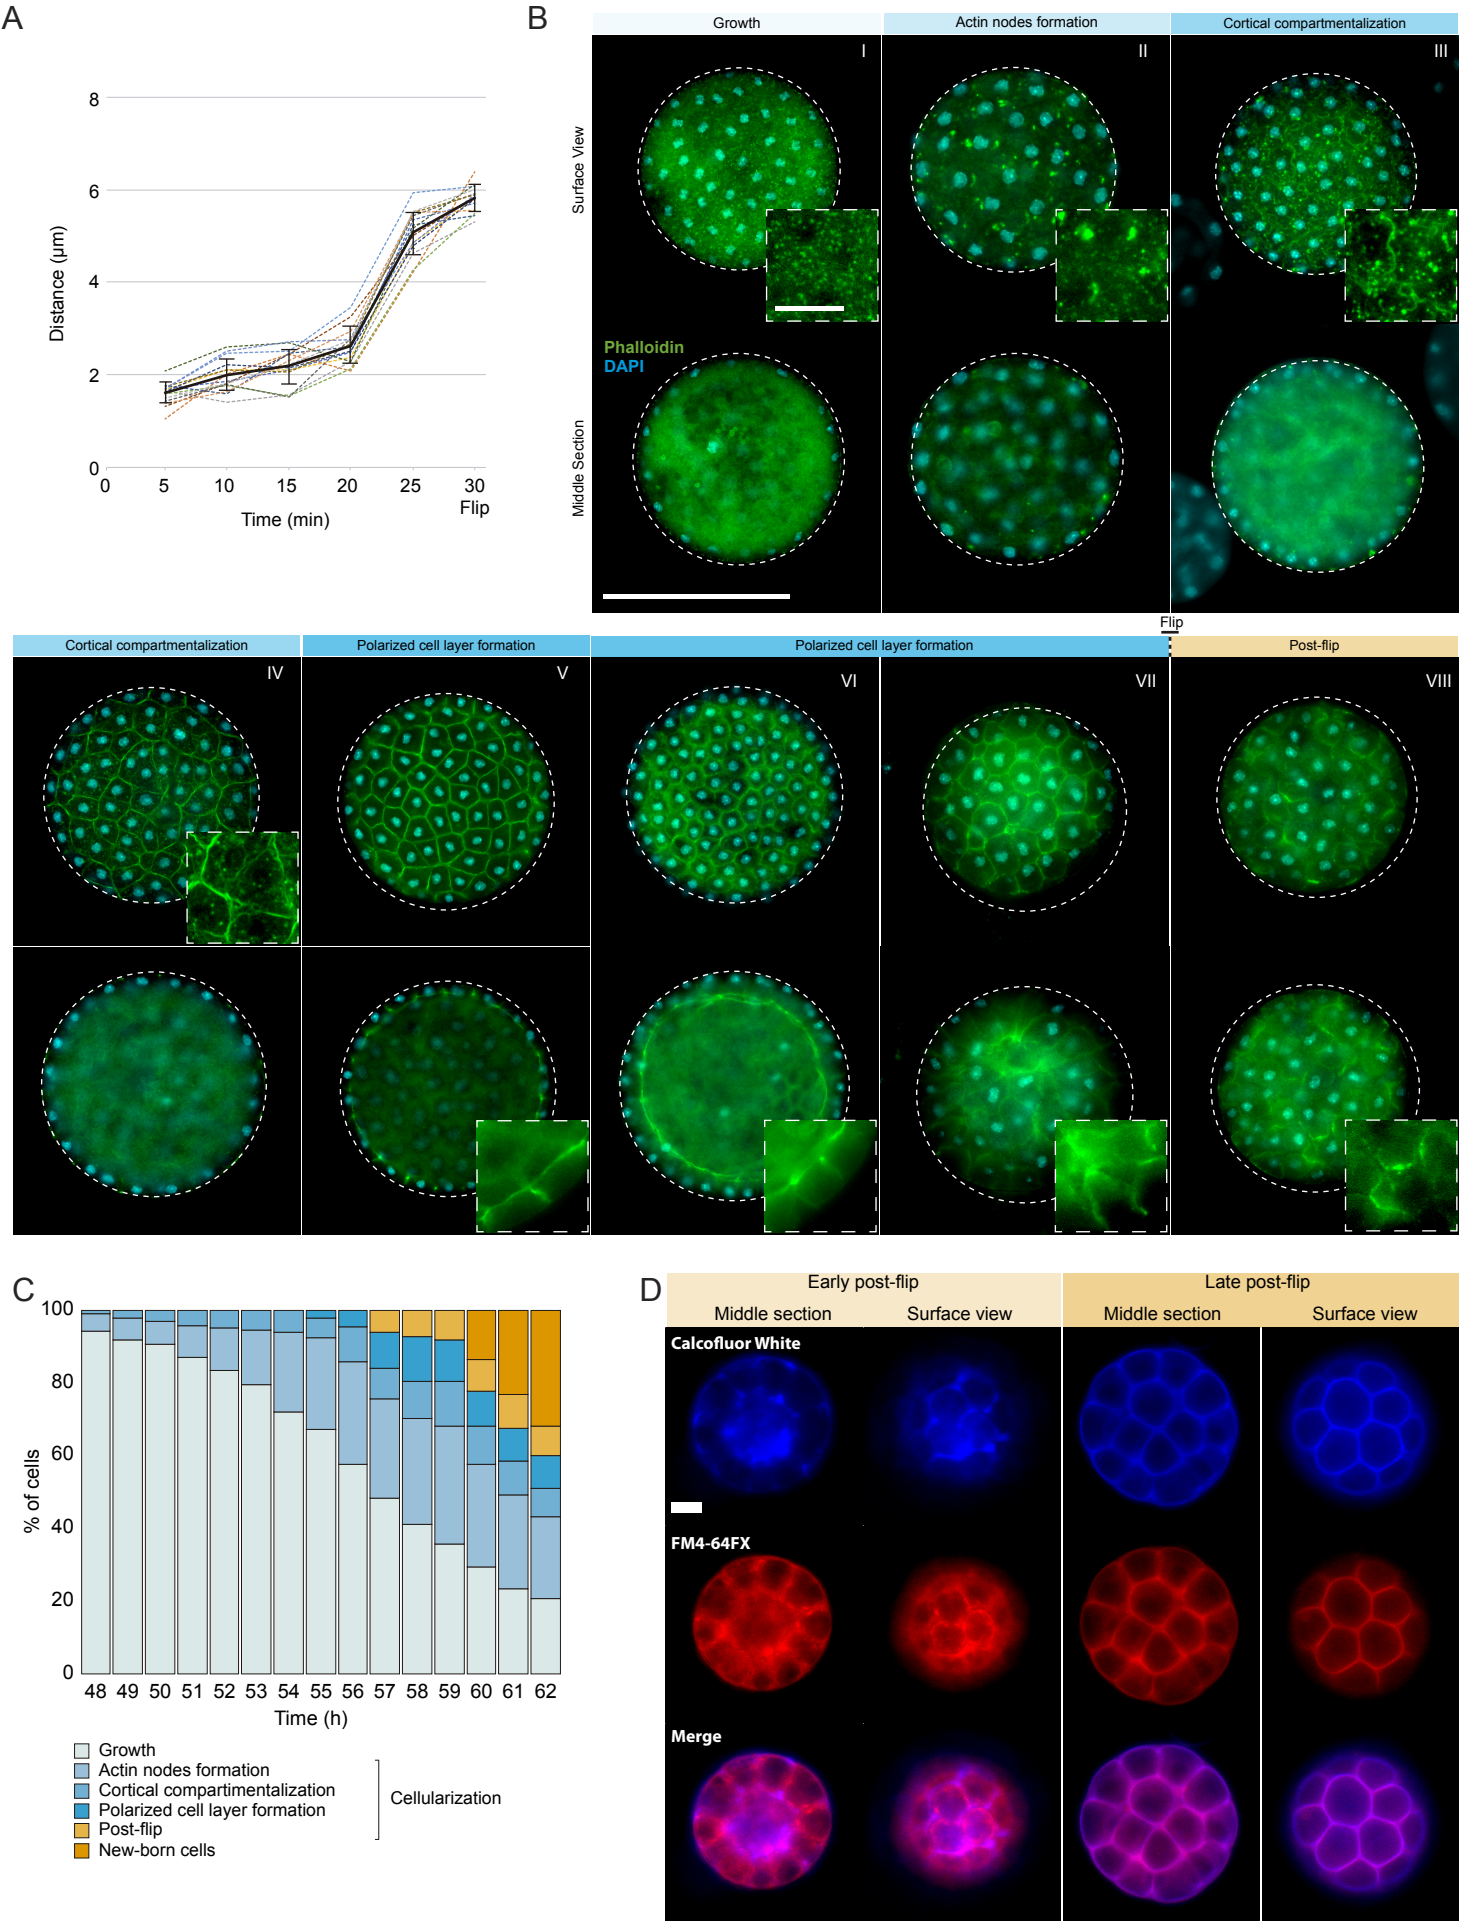

Supplement: supp [file elife_poa_e49801_Figure_2_figure_supplement_1.pdf › elife_poa_e49801_Figure_2_figure_supplement_1.pdf]

Figure 3-figure supplement 1

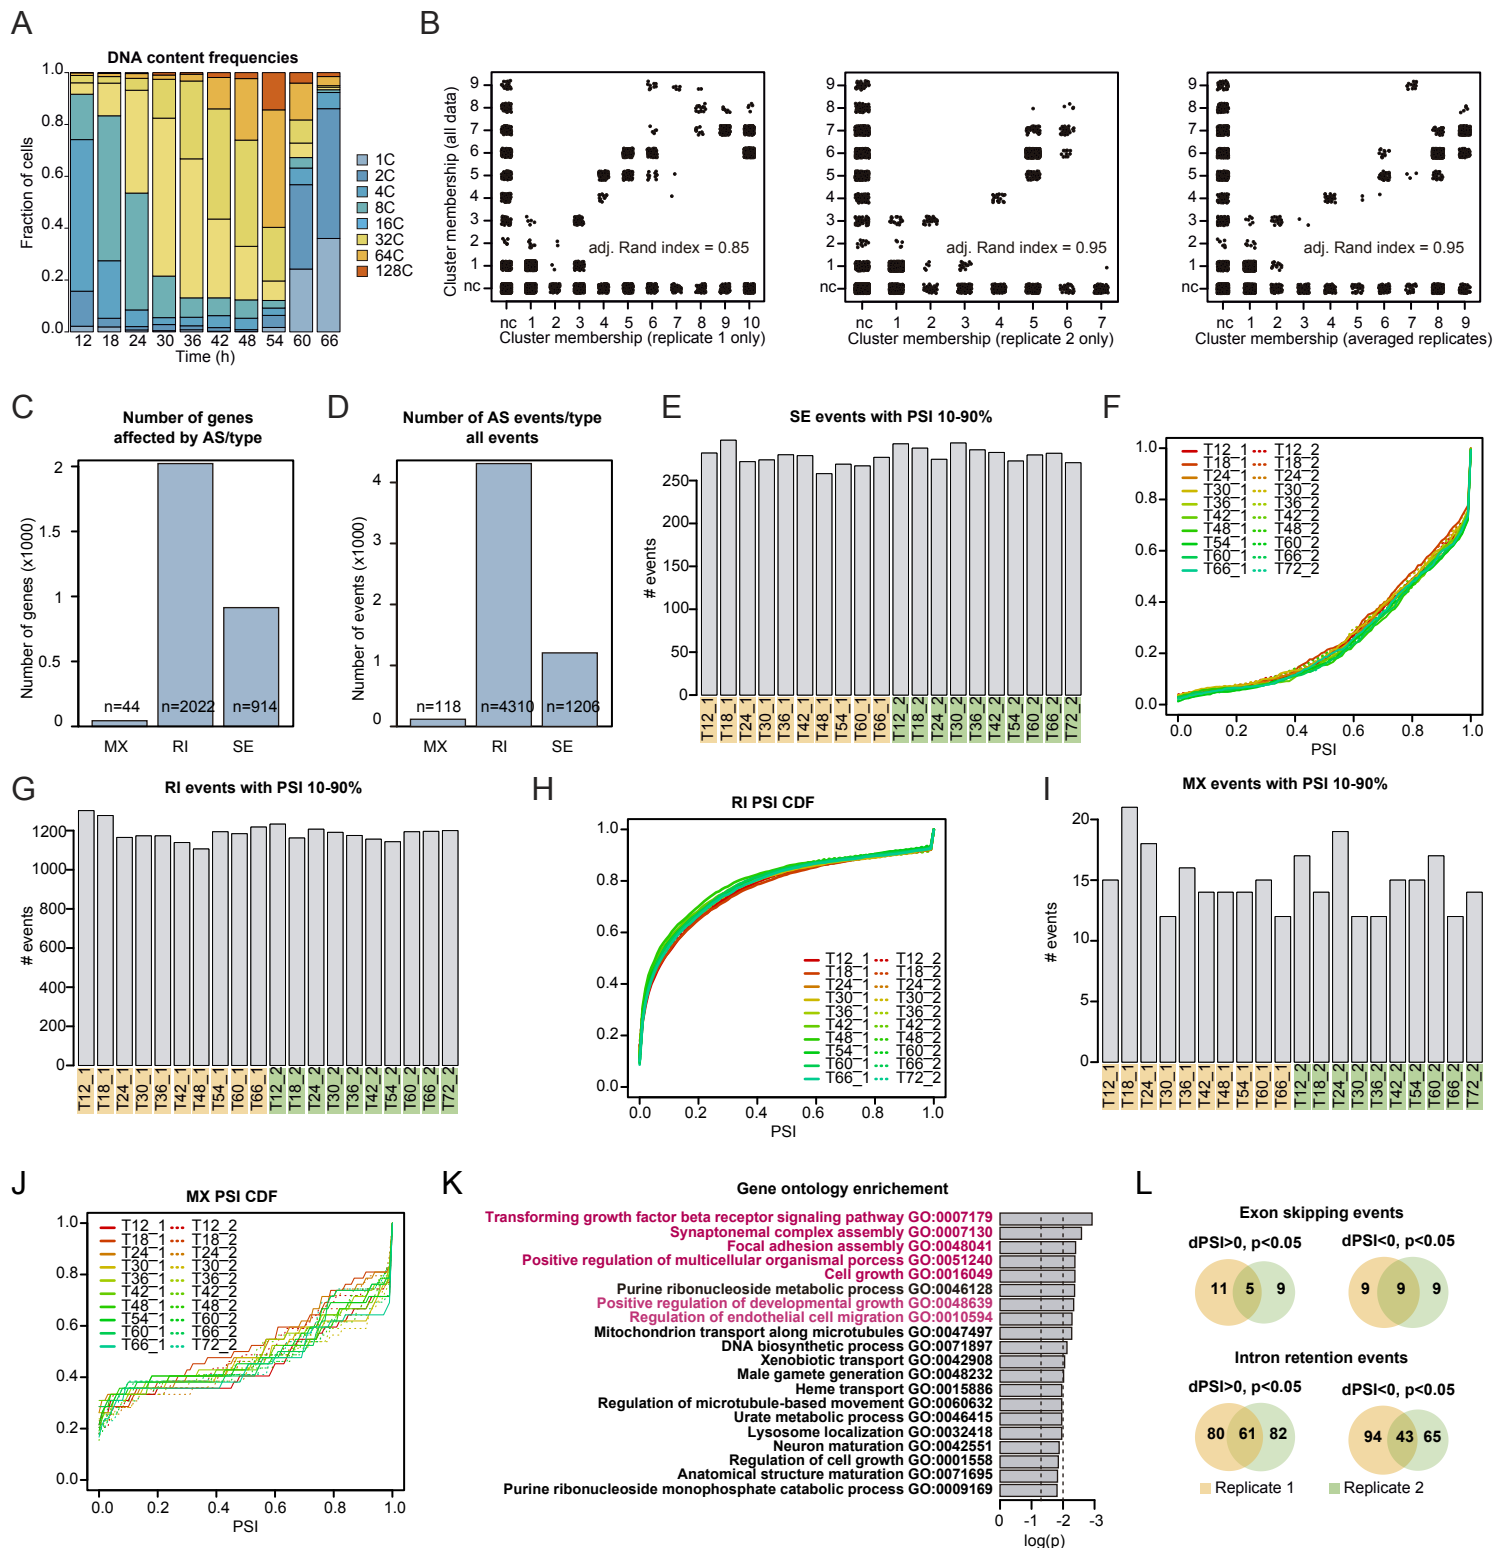

Supplement: supp [file elife_poa_e49801_Figure_3_figure_supplement_1.pdf › elife_poa_e49801_Figure_3_figure_supplement_1.pdf]

Figure 4-figure supplement 1

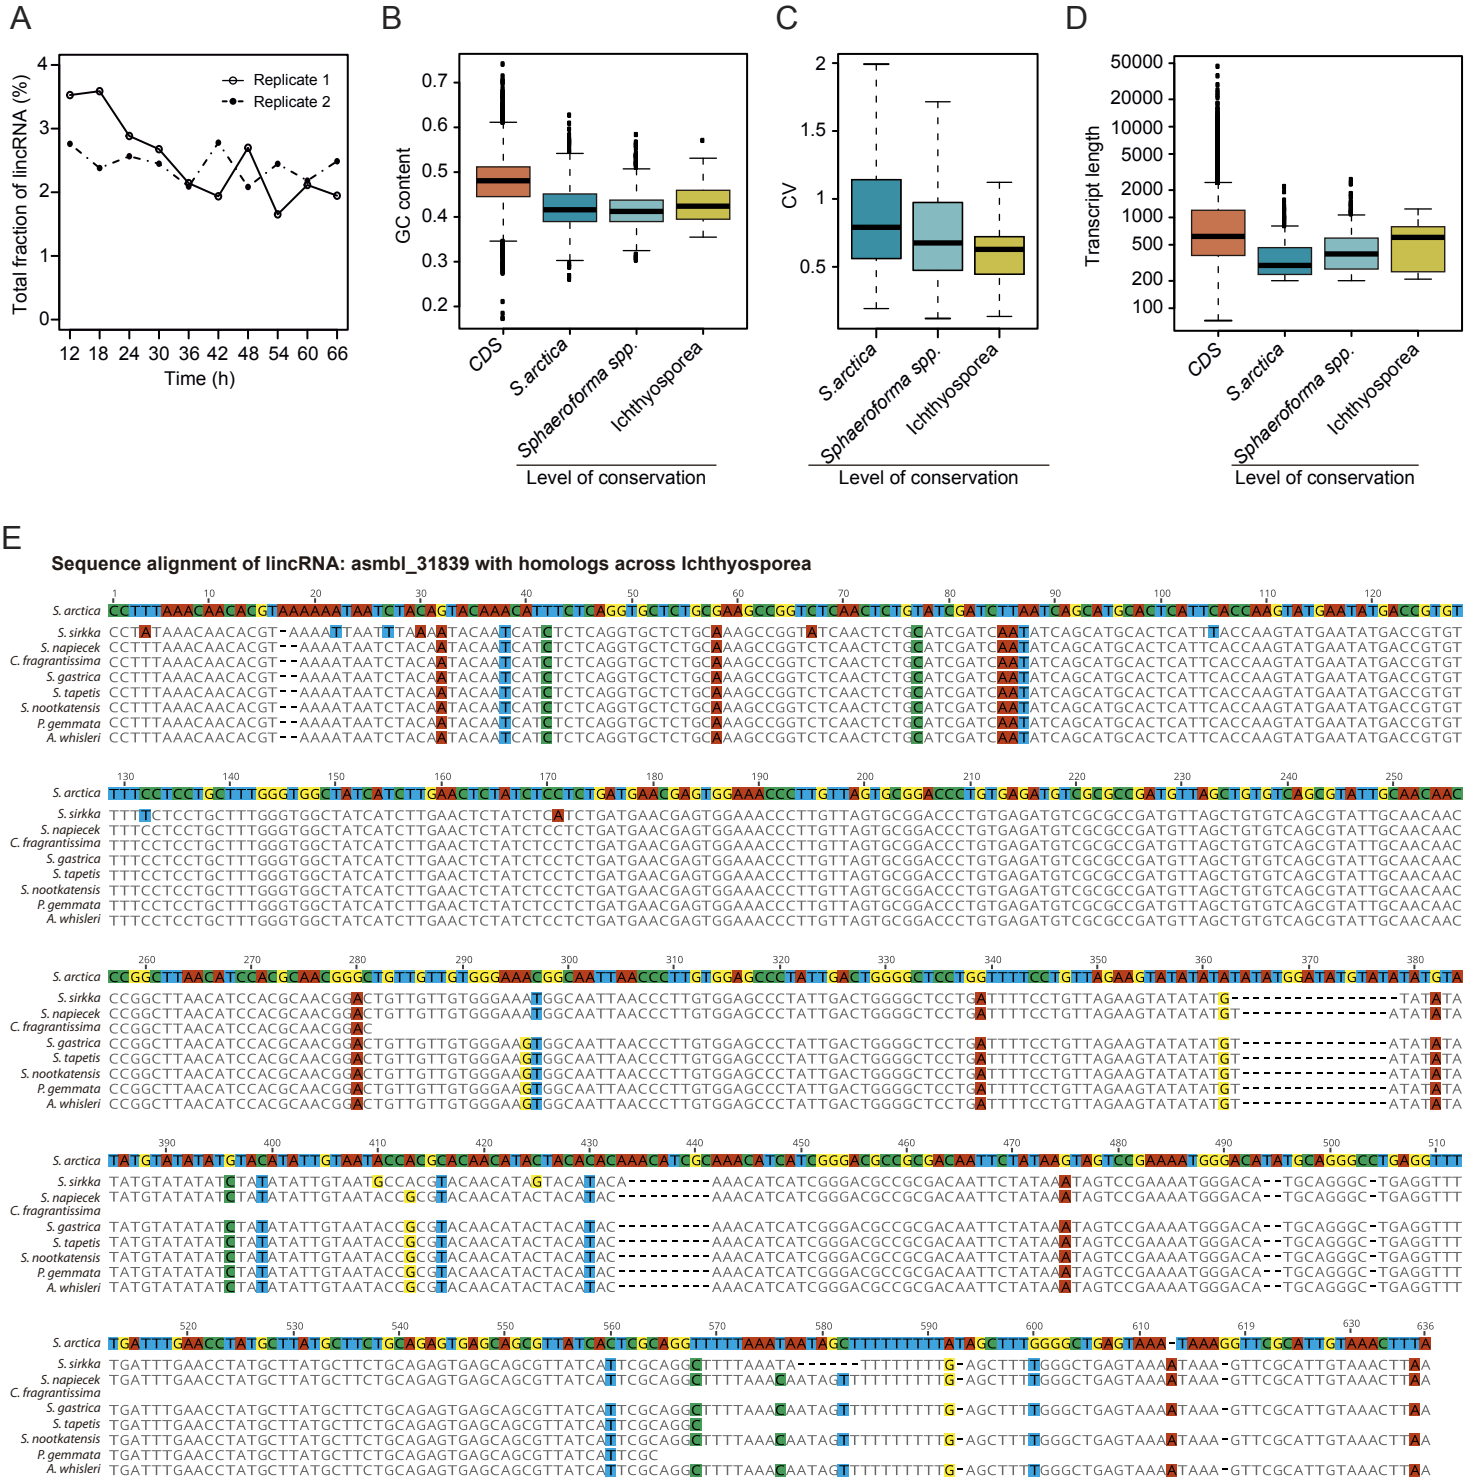

Supplement: supp [file elife_poa_e49801_Figure_4_figure_supplement_1.pdf › elife_poa_e49801_Figure_4_figure_supplement_1.pdf]

Figure 4-figure supplement 2

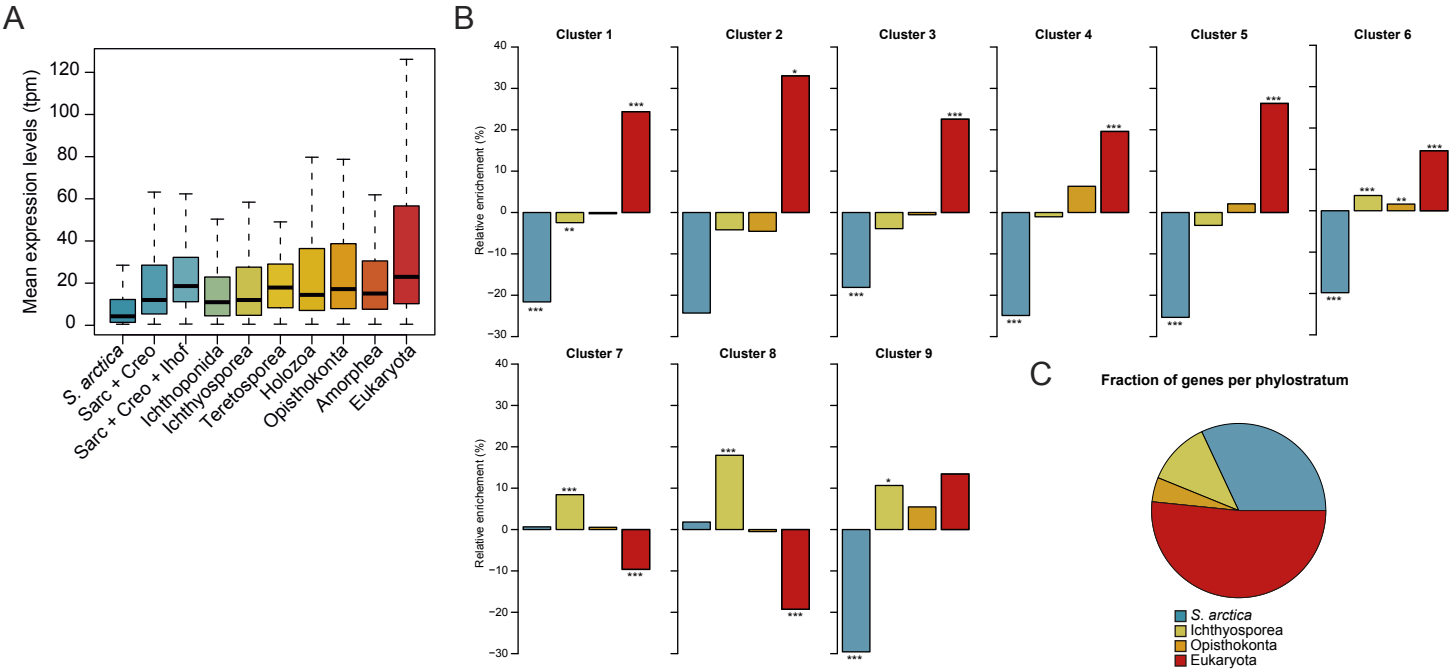

Supplement: supp [file elife_poa_e49801_Figure_4_figure_supplement_2.pdf › elife_poa_e49801_Figure_4_figure_supplement_2.pdf]

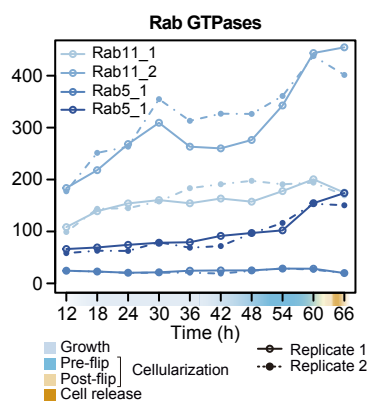

Supplement: supp [file elife_poa_e49801_Figure_5_figure_supplement_1.pdf › elife_poa_e49801_Figure_5_figure_supplement_1.pdf]

Figure 6-figure supplement 1

A

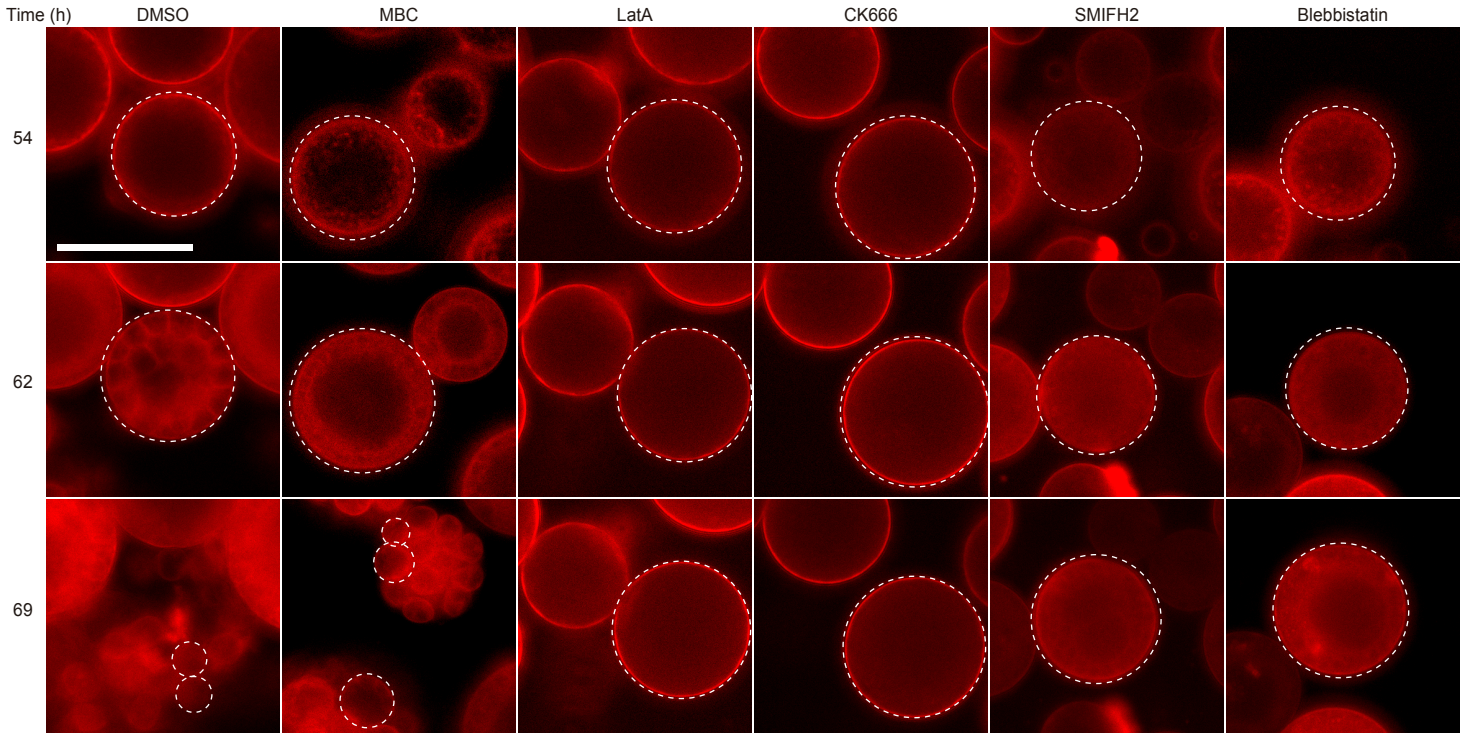

B

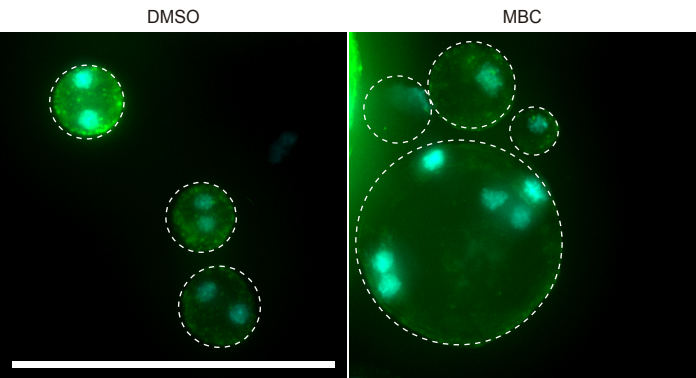

C

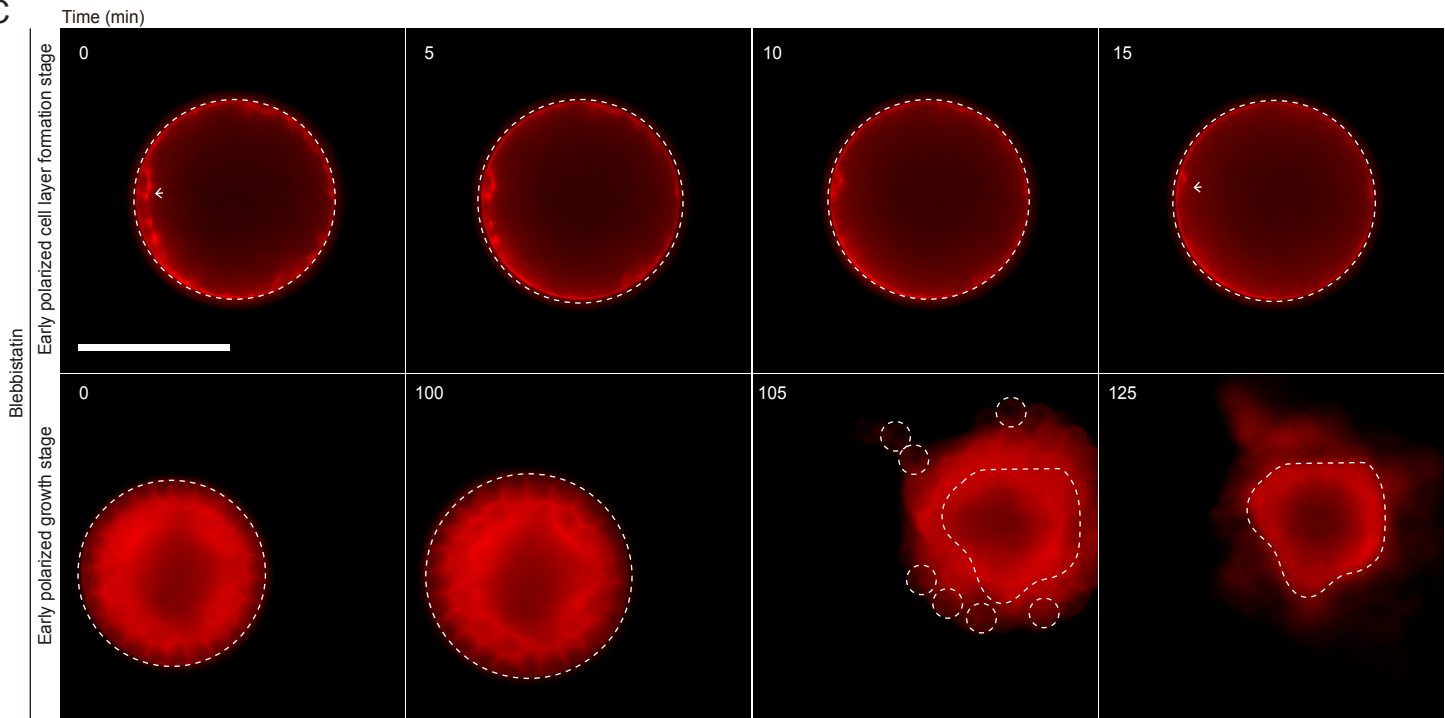

Supplement: supp [file elife_poa_e49801_Figure_6_figure_supplement_1.pdf › elife_poa_e49801_Figure_6_figure_supplement_1.pdf]
